# Supplementary material for: Intra-rater and inter-rater reliability of a handheld myotonometer measuring myofascial stiffness of lower lumbar myofascial tissue in healthy adults
Source: PeerJ. 2024 Nov 18;12:e18524. doi: 10.7717/peerj.18524 (PMC11580663; doi:10.7717/peerj.18524)
Supplement: Supplemental Information 1 [file peerj-12-18524-s001.xlsm]

## Sheet: Database
			C:\Program Files (x86)\MyotonPRO\myotonDB.sdf																						Delete	Delete	Delete	Delete	Delete
Measurement ID	Measurement time	Iteration	Subject ID		Birth date	Gender	Height	Weight	BMI	Dominant side	Pattern	Object	Location	Position	Side	State	Frequency	Stiffness	Decrement	Relaxation	Creep	Taptime	Operator	Device SN	Year	Month	Week	Weekday	Period
7.32468e+18	2024-01-16 14:16:22	1			1976-01-25	Male	175	89	29.1	Right	FIRST TEST	Erector Spin	Lateral	Lying	Left	Relaxed	16.3	323	1.26	16.5	1.02	15	Fabio Valenti	000560	2024	1	3	2	Day
7.32468e+18	2024-01-16 14:16:23	2			1976-01-25	Male	175	89	29.1	Right	FIRST TEST	Erector Spin	Lateral	Lying	Left	Relaxed	16.5	336	1.25	16.1	0.99	15	Fabio Valenti	000560	2024	1	3	2	Day
7.32468e+18	2024-01-16 14:16:23	3			1976-01-25	Male	175	89	29.1	Right	FIRST TEST	Erector Spin	Lateral	Lying	Left	Relaxed	16.5	334	1.26	16.2	1	15	Fabio Valenti	000560	2024	1	3	2	Day
7.32468e+18	2024-01-16 14:16:24	4			1976-01-25	Male	175	89	29.1	Right	FIRST TEST	Erector Spin	Lateral	Lying	Left	Relaxed	16.5	332	1.27	16.3	1.01	15	Fabio Valenti	000560	2024	1	3	2	Day
7.32468e+18	2024-01-16 14:16:25	5			1976-01-25	Male	175	89	29.1	Right	FIRST TEST	Erector Spin	Lateral	Lying	Left	Relaxed	16.6	337	1.24	16.2	1.01	15	Fabio Valenti	000560	2024	1	3	2	Day
7.32468e+18	2024-01-16 14:16:39	1			1976-01-25	Male	175	89	29.1	Right	FIRST TEST	Erector Spin	Lateral	Lying	Right	Relaxed	16.9	322	1.32	16.8	1.04	15	Fabio Valenti	000560	2024	1	3	2	Day
7.32468e+18	2024-01-16 14:16:40	2			1976-01-25	Male	175	89	29.1	Right	FIRST TEST	Erector Spin	Lateral	Lying	Right	Relaxed	16.9	334	1.31	16.2	1.01	15	Fabio Valenti	000560	2024	1	3	2	Day
7.32468e+18	2024-01-16 14:16:40	3			1976-01-25	Male	175	89	29.1	Right	FIRST TEST	Erector Spin	Lateral	Lying	Right	Relaxed	17.2	338	1.3	16	0.99	15	Fabio Valenti	000560	2024	1	3	2	Day
7.32468e+18	2024-01-16 14:16:41	4			1976-01-25	Male	175	89	29.1	Right	FIRST TEST	Erector Spin	Lateral	Lying	Right	Relaxed	17.1	335	1.3	16.3	1.01	15	Fabio Valenti	000560	2024	1	3	2	Day
7.32468e+18	2024-01-16 14:16:42	5			1976-01-25	Male	175	89	29.1	Right	FIRST TEST	Erector Spin	Lateral	Lying	Right	Relaxed	17.1	341	1.29	16.3	1.02	15	Fabio Valenti	000560	2024	1	3	2	Day
7.32468e+18	2024-01-16 14:16:57	1			1976-01-25	Male	175	89	29.1	Right	FIRST TEST	Erector Spin	Lateral	Sitting	Left	Relaxed	20.6	533	0.89	9.9	0.64	15	Fabio Valenti	000560	2024	1	3	2	Day
7.32468e+18	2024-01-16 14:16:58	2			1976-01-25	Male	175	89	29.1	Right	FIRST TEST	Erector Spin	Lateral	Sitting	Left	Relaxed	20.6	536	0.86	9.9	0.65	15	Fabio Valenti	000560	2024	1	3	2	Day
7.32468e+18	2024-01-16 14:16:59	3			1976-01-25	Male	175	89	29.1	Right	FIRST TEST	Erector Spin	Lateral	Sitting	Left	Relaxed	20.9	537	0.86	9.9	0.65	15	Fabio Valenti	000560	2024	1	3	2	Day
7.32468e+18	2024-01-16 14:16:59	4			1976-01-25	Male	175	89	29.1	Right	FIRST TEST	Erector Spin	Lateral	Sitting	Left	Relaxed	21	544	0.84	9.7	0.63	15	Fabio Valenti	000560	2024	1	3	2	Day
7.32468e+18	2024-01-16 14:17:00	5			1976-01-25	Male	175	89	29.1	Right	FIRST TEST	Erector Spin	Lateral	Sitting	Left	Relaxed	20.8	542	0.84	9.7	0.63	15	Fabio Valenti	000560	2024	1	3	2	Day
7.32468e+18	2024-01-16 14:17:07	1			1976-01-25	Male	175	89	29.1	Right	FIRST TEST	Erector Spin	Lateral	Sitting	Right	Relaxed	21.1	572	0.96	9.2	0.6	15	Fabio Valenti	000560	2024	1	3	2	Day
7.32468e+18	2024-01-16 14:17:08	2			1976-01-25	Male	175	89	29.1	Right	FIRST TEST	Erector Spin	Lateral	Sitting	Right	Relaxed	21.2	577	0.95	9.2	0.6	15	Fabio Valenti	000560	2024	1	3	2	Day
7.32468e+18	2024-01-16 14:17:08	3			1976-01-25	Male	175	89	29.1	Right	FIRST TEST	Erector Spin	Lateral	Sitting	Right	Relaxed	21.2	581	0.98	9.2	0.6	15	Fabio Valenti	000560	2024	1	3	2	Day
7.32468e+18	2024-01-16 14:17:09	4			1976-01-25	Male	175	89	29.1	Right	FIRST TEST	Erector Spin	Lateral	Sitting	Right	Relaxed	21.2	580	0.93	9.2	0.61	15	Fabio Valenti	000560	2024	1	3	2	Day
7.32468e+18	2024-01-16 14:17:10	5			1976-01-25	Male	175	89	29.1	Right	FIRST TEST	Erector Spin	Lateral	Sitting	Right	Relaxed	21.2	579	0.93	9.2	0.61	15	Fabio Valenti	000560	2024	1	3	2	Day
7.32469e+18	2024-01-16 14:46:14	1			1976-01-25	Male	175	89	29.1	Right	SECOND TESTING 30 min	Erector Spin	Lateral	Lying	Left	Relaxed	17.7	379	1.48	14.7	0.93	15	Fabio Valenti	000560	2024	1	3	2	Day
7.32469e+18	2024-01-16 14:46:15	2			1976-01-25	Male	175	89	29.1	Right	SECOND TESTING 30 min	Erector Spin	Lateral	Lying	Left	Relaxed	17.7	389	1.43	14.4	0.91	15	Fabio Valenti	000560	2024	1	3	2	Day
7.32469e+18	2024-01-16 14:46:16	3			1976-01-25	Male	175	89	29.1	Right	SECOND TESTING 30 min	Erector Spin	Lateral	Lying	Left	Relaxed	17.9	393	1.43	14.2	0.9	15	Fabio Valenti	000560	2024	1	3	2	Day
7.32469e+18	2024-01-16 14:46:16	4			1976-01-25	Male	175	89	29.1	Right	SECOND TESTING 30 min	Erector Spin	Lateral	Lying	Left	Relaxed	18.1	395	1.42	14.1	0.9	15	Fabio Valenti	000560	2024	1	3	2	Day
7.32469e+18	2024-01-16 14:46:17	5			1976-01-25	Male	175	89	29.1	Right	SECOND TESTING 30 min	Erector Spin	Lateral	Lying	Left	Relaxed	18.3	407	1.41	13.9	0.88	15	Fabio Valenti	000560	2024	1	3	2	Day
7.32469e+18	2024-01-16 14:46:23	1			1976-01-25	Male	175	89	29.1	Right	SECOND TESTING 30 min	Erector Spin	Lateral	Lying	Right	Relaxed	17.8	365	1.53	15.2	0.95	15	Fabio Valenti	000560	2024	1	3	2	Day
7.32469e+18	2024-01-16 14:46:24	2			1976-01-25	Male	175	89	29.1	Right	SECOND TESTING 30 min	Erector Spin	Lateral	Lying	Right	Relaxed	17.7	368	1.48	15.2	0.95	15	Fabio Valenti	000560	2024	1	3	2	Day
7.32469e+18	2024-01-16 14:46:25	3			1976-01-25	Male	175	89	29.1	Right	SECOND TESTING 30 min	Erector Spin	Lateral	Lying	Right	Relaxed	17.5	369	1.47	15.1	0.95	15	Fabio Valenti	000560	2024	1	3	2	Day
7.32469e+18	2024-01-16 14:46:26	4			1976-01-25	Male	175	89	29.1	Right	SECOND TESTING 30 min	Erector Spin	Lateral	Lying	Right	Relaxed	17.1	370	1.48	15.1	0.95	15	Fabio Valenti	000560	2024	1	3	2	Day
7.32469e+18	2024-01-16 14:46:26	5			1976-01-25	Male	175	89	29.1	Right	SECOND TESTING 30 min	Erector Spin	Lateral	Lying	Right	Relaxed	17.2	371	1.48	15.1	0.95	15	Fabio Valenti	000560	2024	1	3	2	Day
7.32469e+18	2024-01-16 14:47:04	1			1976-01-25	Male	175	89	29.1	Right	SECOND TESTING 30 min	Erector Spin	Lateral	Sitting	Left	Relaxed	20.4	507	0.82	10.4	0.67	15	Fabio Valenti	000560	2024	1	3	2	Day
7.32469e+18	2024-01-16 14:47:04	2			1976-01-25	Male	175	89	29.1	Right	SECOND TESTING 30 min	Erector Spin	Lateral	Sitting	Left	Relaxed	20.4	513	0.79	10.2	0.66	15	Fabio Valenti	000560	2024	1	3	2	Day
7.32469e+18	2024-01-16 14:47:05	3			1976-01-25	Male	175	89	29.1	Right	SECOND TESTING 30 min	Erector Spin	Lateral	Sitting	Left	Relaxed	20.4	510	0.83	10.3	0.66	15	Fabio Valenti	000560	2024	1	3	2	Day
7.32469e+18	2024-01-16 14:47:06	4			1976-01-25	Male	175	89	29.1	Right	SECOND TESTING 30 min	Erector Spin	Lateral	Sitting	Left	Relaxed	20.5	505	0.82	10.4	0.67	15	Fabio Valenti	000560	2024	1	3	2	Day
7.32469e+18	2024-01-16 14:47:07	5			1976-01-25	Male	175	89	29.1	Right	SECOND TESTING 30 min	Erector Spin	Lateral	Sitting	Left	Relaxed	20.3	501	0.83	10.5	0.68	15	Fabio Valenti	000560	2024	1	3	2	Day
7.32469e+18	2024-01-16 14:47:13	1			1976-01-25	Male	175	89	29.1	Right	SECOND TESTING 30 min	Erector Spin	Lateral	Sitting	Right	Relaxed	20.6	566	1.01	9.5	0.63	15	Fabio Valenti	000560	2024	1	3	2	Day
7.32469e+18	2024-01-16 14:47:14	2			1976-01-25	Male	175	89	29.1	Right	SECOND TESTING 30 min	Erector Spin	Lateral	Sitting	Right	Relaxed	19.9	561	0.99	9.7	0.64	15	Fabio Valenti	000560	2024	1	3	2	Day
7.32469e+18	2024-01-16 14:47:14	3			1976-01-25	Male	175	89	29.1	Right	SECOND TESTING 30 min	Erector Spin	Lateral	Sitting	Right	Relaxed	19.9	563	0.98	9.8	0.65	15	Fabio Valenti	000560	2024	1	3	2	Day
7.32469e+18	2024-01-16 14:47:15	4			1976-01-25	Male	175	89	29.1	Right	SECOND TESTING 30 min	Erector Spin	Lateral	Sitting	Right	Relaxed	19.6	558	0.96	9.8	0.65	15	Fabio Valenti	000560	2024	1	3	2	Day
7.32469e+18	2024-01-16 14:47:16	5			1976-01-25	Male	175	89	29.1	Right	SECOND TESTING 30 min	Erector Spin	Lateral	Sitting	Right	Relaxed	19.5	553	0.94	10	0.66	15	Fabio Valenti	000560	2024	1	3	2	Day
7.32506e+18	2024-01-17 14:50:09	1			1976-01-25	Male	175	89	29.1	Right	THIRD TEST 24h	Erector Spin	Lateral	Lying	Left	Relaxed	18.4	389	1.57	14.3	0.9	15	Fabio Valenti	000560	2024	1	3	3	Day
7.32506e+18	2024-01-17 14:50:10	2			1976-01-25	Male	175	89	29.1	Right	THIRD TEST 24h	Erector Spin	Lateral	Lying	Left	Relaxed	18.6	403	1.55	13.9	0.88	15	Fabio Valenti	000560	2024	1	3	3	Day
7.32506e+18	2024-01-17 14:50:11	3			1976-01-25	Male	175	89	29.1	Right	THIRD TEST 24h	Erector Spin	Lateral	Lying	Left	Relaxed	18.9	403	1.55	14	0.88	15	Fabio Valenti	000560	2024	1	3	3	Day
7.32506e+18	2024-01-17 14:50:12	4			1976-01-25	Male	175	89	29.1	Right	THIRD TEST 24h	Erector Spin	Lateral	Lying	Left	Relaxed	19.1	403	1.53	14	0.89	15	Fabio Valenti	000560	2024	1	3	3	Day
7.32506e+18	2024-01-17 14:50:12	5			1976-01-25	Male	175	89	29.1	Right	THIRD TEST 24h	Erector Spin	Lateral	Lying	Left	Relaxed	19.1	410	1.52	13.7	0.87	15	Fabio Valenti	000560	2024	1	3	3	Day
7.32506e+18	2024-01-17 14:50:19	1			1976-01-25	Male	175	89	29.1	Right	THIRD TEST 24h	Erector Spin	Lateral	Lying	Right	Relaxed	17.5	341	1.69	15.9	0.97	15	Fabio Valenti	000560	2024	1	3	3	Day
7.32506e+18	2024-01-17 14:50:20	2			1976-01-25	Male	175	89	29.1	Right	THIRD TEST 24h	Erector Spin	Lateral	Lying	Right	Relaxed	17.8	358	1.61	15.3	0.95	15	Fabio Valenti	000560	2024	1	3	3	Day
7.32506e+18	2024-01-17 14:50:22	3			1976-01-25	Male	175	89	29.1	Right	THIRD TEST 24h	Erector Spin	Lateral	Lying	Right	Relaxed	17.9	357	1.62	15.4	0.96	15	Fabio Valenti	000560	2024	1	3	3	Day
7.32506e+18	2024-01-17 14:50:23	4			1976-01-25	Male	175	89	29.1	Right	THIRD TEST 24h	Erector Spin	Lateral	Lying	Right	Relaxed	17.8	356	1.6	15.6	0.97	15	Fabio Valenti	000560	2024	1	3	3	Day
7.32506e+18	2024-01-17 14:50:24	5			1976-01-25	Male	175	89	29.1	Right	THIRD TEST 24h	Erector Spin	Lateral	Lying	Right	Relaxed	17.9	359	1.58	15.4	0.96	15	Fabio Valenti	000560	2024	1	3	3	Day
7.32506e+18	2024-01-17 14:50:43	1			1976-01-25	Male	175	89	29.1	Right	THIRD TEST 24h	Erector Spin	Lateral	Sitting	Left	Relaxed	22.4	552	0.87	9.5	0.61	15	Fabio Valenti	000560	2024	1	3	3	Day
7.32506e+18	2024-01-17 14:50:44	2			1976-01-25	Male	175	89	29.1	Right	THIRD TEST 24h	Erector Spin	Lateral	Sitting	Left	Relaxed	23.1	578	0.88	9.1	0.59	15	Fabio Valenti	000560	2024	1	3	3	Day
7.32506e+18	2024-01-17 14:50:44	3			1976-01-25	Male	175	89	29.1	Right	THIRD TEST 24h	Erector Spin	Lateral	Sitting	Left	Relaxed	23.2	589	0.86	9	0.59	15	Fabio Valenti	000560	2024	1	3	3	Day
7.32506e+18	2024-01-17 14:50:45	4			1976-01-25	Male	175	89	29.1	Right	THIRD TEST 24h	Erector Spin	Lateral	Sitting	Left	Relaxed	22.7	583	0.86	9	0.59	15	Fabio Valenti	000560	2024	1	3	3	Day
7.32506e+18	2024-01-17 14:50:46	5			1976-01-25	Male	175	89	29.1	Right	THIRD TEST 24h	Erector Spin	Lateral	Sitting	Left	Relaxed	22.9	583	0.84	9	0.59	15	Fabio Valenti	000560	2024	1	3	3	Day
7.32506e+18	2024-01-17 14:50:54	1			1976-01-25	Male	175	89	29.1	Right	THIRD TEST 24h	Erector Spin	Lateral	Sitting	Right	Relaxed	22.1	583	0.96	9.2	0.6	15	Fabio Valenti	000560	2024	1	3	3	Day
7.32506e+18	2024-01-17 14:50:55	2			1976-01-25	Male	175	89	29.1	Right	THIRD TEST 24h	Erector Spin	Lateral	Sitting	Right	Relaxed	22.1	587	0.94	9.1	0.6	15	Fabio Valenti	000560	2024	1	3	3	Day
7.32506e+18	2024-01-17 14:50:56	3			1976-01-25	Male	175	89	29.1	Right	THIRD TEST 24h	Erector Spin	Lateral	Sitting	Right	Relaxed	22.1	590	0.93	9.1	0.6	15	Fabio Valenti	000560	2024	1	3	3	Day
7.32506e+18	2024-01-17 14:50:57	4			1976-01-25	Male	175	89	29.1	Right	THIRD TEST 24h	Erector Spin	Lateral	Sitting	Right	Relaxed	22.1	592	0.91	9.1	0.6	15	Fabio Valenti	000560	2024	1	3	3	Day
7.32506e+18	2024-01-17 14:51:02	5			1976-01-25	Male	175	89	29.1	Right	THIRD TEST 24h	Erector Spin	Lateral	Sitting	Right	Relaxed	20.9	577	0.93	9.4	0.62	15	Fabio Valenti	000560	2024	1	3	3	Day
7.32276e+18	2024-01-11 09:55:12	1			1972-09-14	Female	170	63	21.8	Right	FIRST TEST	Erector Spin	Lateral	Lying	Left	Relaxed	13.9	233	1.2	24.7	1.52	15	Fabio Valenti	000560	2024	1	2	4	Morning
7.32276e+18	2024-01-11 09:55:13	2			1972-09-14	Female	170	63	21.8	Right	FIRST TEST	Erector Spin	Lateral	Lying	Left	Relaxed	13.8	233	1.18	24.8	1.53	15	Fabio Valenti	000560	2024	1	2	4	Morning
7.32276e+18	2024-01-11 09:55:14	3			1972-09-14	Female	170	63	21.8	Right	FIRST TEST	Erector Spin	Lateral	Lying	Left	Relaxed	13.7	232	1.17	24.8	1.53	15	Fabio Valenti	000560	2024	1	2	4	Morning
7.32276e+18	2024-01-11 09:55:14	4			1972-09-14	Female	170	63	21.8	Right	FIRST TEST	Erector Spin	Lateral	Lying	Left	Relaxed	13.7	228	1.15	25.2	1.55	15	Fabio Valenti	000560	2024	1	2	4	Morning
7.32276e+18	2024-01-11 09:55:17	5			1972-09-14	Female	170	63	21.8	Right	FIRST TEST	Erector Spin	Lateral	Lying	Left	Relaxed	13.7	231	1.2	25.1	1.55	15	Fabio Valenti	000560	2024	1	2	4	Morning
7.32276e+18	2024-01-11 09:55:38	1			1972-09-14	Female	170	63	21.8	Right	FIRST TEST	Erector Spin	Lateral	Lying	Right	Relaxed	12.9	224	1.27	25.3	1.55	15	Fabio Valenti	000560	2024	1	2	4	Morning
7.32276e+18	2024-01-11 09:55:40	2			1972-09-14	Female	170	63	21.8	Right	FIRST TEST	Erector Spin	Lateral	Lying	Right	Relaxed	13	229	1.28	24.8	1.53	15	Fabio Valenti	000560	2024	1	2	4	Morning
7.32276e+18	2024-01-11 09:55:41	3			1972-09-14	Female	170	63	21.8	Right	FIRST TEST	Erector Spin	Lateral	Lying	Right	Relaxed	13	224	1.25	25.1	1.54	15	Fabio Valenti	000560	2024	1	2	4	Morning
7.32276e+18	2024-01-11 09:55:42	4			1972-09-14	Female	170	63	21.8	Right	FIRST TEST	Erector Spin	Lateral	Lying	Right	Relaxed	12.9	228	1.26	24.8	1.53	15	Fabio Valenti	000560	2024	1	2	4	Morning
7.32276e+18	2024-01-11 09:55:42	5			1972-09-14	Female	170	63	21.8	Right	FIRST TEST	Erector Spin	Lateral	Lying	Right	Relaxed	12.9	222	1.22	25.4	1.56	15	Fabio Valenti	000560	2024	1	2	4	Morning
7.32276e+18	2024-01-11 09:56:19	1			1972-09-14	Female	170	63	21.8	Right	FIRST TEST	Erector Spin	Lateral	Sitting	Left	Relaxed	15.5	354	1.57	15.2	0.95	15	Fabio Valenti	000560	2024	1	2	4	Morning
7.32276e+18	2024-01-11 09:56:20	2			1972-09-14	Female	170	63	21.8	Right	FIRST TEST	Erector Spin	Lateral	Sitting	Left	Relaxed	15.4	359	1.53	15.2	0.96	15	Fabio Valenti	000560	2024	1	2	4	Morning
7.32276e+18	2024-01-11 09:56:20	3			1972-09-14	Female	170	63	21.8	Right	FIRST TEST	Erector Spin	Lateral	Sitting	Left	Relaxed	15.4	363	1.54	15.1	0.95	15	Fabio Valenti	000560	2024	1	2	4	Morning
7.32276e+18	2024-01-11 09:56:21	4			1972-09-14	Female	170	63	21.8	Right	FIRST TEST	Erector Spin	Lateral	Sitting	Left	Relaxed	15.5	364	1.53	15	0.95	15	Fabio Valenti	000560	2024	1	2	4	Morning
7.32276e+18	2024-01-11 09:56:22	5			1972-09-14	Female	170	63	21.8	Right	FIRST TEST	Erector Spin	Lateral	Sitting	Left	Relaxed	15.5	364	1.54	15	0.94	15	Fabio Valenti	000560	2024	1	2	4	Morning
7.32276e+18	2024-01-11 09:56:37	1			1972-09-14	Female	170	63	21.8	Right	FIRST TEST	Erector Spin	Lateral	Sitting	Right	Relaxed	16.4	403	1.5	13.8	0.88	15	Fabio Valenti	000560	2024	1	2	4	Morning
7.32276e+18	2024-01-11 09:56:38	2			1972-09-14	Female	170	63	21.8	Right	FIRST TEST	Erector Spin	Lateral	Sitting	Right	Relaxed	16.4	411	1.49	13.5	0.86	15	Fabio Valenti	000560	2024	1	2	4	Morning
7.32276e+18	2024-01-11 09:56:38	3			1972-09-14	Female	170	63	21.8	Right	FIRST TEST	Erector Spin	Lateral	Sitting	Right	Relaxed	16.4	413	1.49	13.5	0.86	15	Fabio Valenti	000560	2024	1	2	4	Morning
7.32276e+18	2024-01-11 09:56:39	4			1972-09-14	Female	170	63	21.8	Right	FIRST TEST	Erector Spin	Lateral	Sitting	Right	Relaxed	16.5	422	1.46	13.5	0.86	15	Fabio Valenti	000560	2024	1	2	4	Morning
7.32276e+18	2024-01-11 09:56:40	5			1972-09-14	Female	170	63	21.8	Right	FIRST TEST	Erector Spin	Lateral	Sitting	Right	Relaxed	16.6	425	1.46	13.3	0.85	15	Fabio Valenti	000560	2024	1	2	4	Morning
7.32277e+18	2024-01-11 10:38:45	1			1972-09-14	Female	170	63	21.8	Right	SECOND TESTING 30 min	Erector Spin	Lateral	Lying	Left	Relaxed	13	225	1.41	25.9	1.58	15	Fabio Valenti	000560	2024	1	2	4	Morning
7.32277e+18	2024-01-11 10:38:46	2			1972-09-14	Female	170	63	21.8	Right	SECOND TESTING 30 min	Erector Spin	Lateral	Lying	Left	Relaxed	13.2	229	1.39	25.3	1.54	15	Fabio Valenti	000560	2024	1	2	4	Morning
7.32277e+18	2024-01-11 10:38:47	3			1972-09-14	Female	170	63	21.8	Right	SECOND TESTING 30 min	Erector Spin	Lateral	Lying	Left	Relaxed	13.2	231	1.44	25.3	1.54	15	Fabio Valenti	000560	2024	1	2	4	Morning
7.32277e+18	2024-01-11 10:38:47	4			1972-09-14	Female	170	63	21.8	Right	SECOND TESTING 30 min	Erector Spin	Lateral	Lying	Left	Relaxed	13.2	230	1.44	25.2	1.53	15	Fabio Valenti	000560	2024	1	2	4	Morning
7.32277e+18	2024-01-11 10:38:48	5			1972-09-14	Female	170	63	21.8	Right	SECOND TESTING 30 min	Erector Spin	Lateral	Lying	Left	Relaxed	13.1	230	1.41	25.4	1.55	15	Fabio Valenti	000560	2024	1	2	4	Morning
7.32277e+18	2024-01-11 10:38:57	1			1972-09-14	Female	170	63	21.8	Right	SECOND TESTING 30 min	Erector Spin	Lateral	Lying	Right	Relaxed	13.7	235	1.5	25.7	1.57	15	Fabio Valenti	000560	2024	1	2	4	Morning
7.32277e+18	2024-01-11 10:38:58	2			1972-09-14	Female	170	63	21.8	Right	SECOND TESTING 30 min	Erector Spin	Lateral	Lying	Right	Relaxed	13.6	228	1.41	25.7	1.57	15	Fabio Valenti	000560	2024	1	2	4	Morning
7.32277e+18	2024-01-11 10:38:59	3			1972-09-14	Female	170	63	21.8	Right	SECOND TESTING 30 min	Erector Spin	Lateral	Lying	Right	Relaxed	13.6	228	1.42	25.4	1.55	15	Fabio Valenti	000560	2024	1	2	4	Morning
7.32277e+18	2024-01-11 10:38:59	4			1972-09-14	Female	170	63	21.8	Right	SECOND TESTING 30 min	Erector Spin	Lateral	Lying	Right	Relaxed	13.7	230	1.43	25.3	1.54	15	Fabio Valenti	000560	2024	1	2	4	Morning
7.32277e+18	2024-01-11 10:39:00	5			1972-09-14	Female	170	63	21.8	Right	SECOND TESTING 30 min	Erector Spin	Lateral	Lying	Right	Relaxed	13.5	228	1.43	25.6	1.55	15	Fabio Valenti	000560	2024	1	2	4	Morning
7.32277e+18	2024-01-11 10:39:39	1			1972-09-14	Female	170	63	21.8	Right	SECOND TESTING 30 min	Erector Spin	Lateral	Sitting	Left	Relaxed	16.9	356	1.29	15.9	0.99	15	Fabio Valenti	000560	2024	1	2	4	Morning
7.32277e+18	2024-01-11 10:39:40	2			1972-09-14	Female	170	63	21.8	Right	SECOND TESTING 30 min	Erector Spin	Lateral	Sitting	Left	Relaxed	17.4	370	1.26	15.2	0.95	15	Fabio Valenti	000560	2024	1	2	4	Morning
7.32277e+18	2024-01-11 10:39:43	3			1972-09-14	Female	170	63	21.8	Right	SECOND TESTING 30 min	Erector Spin	Lateral	Sitting	Left	Relaxed	17.2	373	1.26	15.1	0.95	15	Fabio Valenti	000560	2024	1	2	4	Morning
7.32277e+18	2024-01-11 10:39:43	4			1972-09-14	Female	170	63	21.8	Right	SECOND TESTING 30 min	Erector Spin	Lateral	Sitting	Left	Relaxed	17.3	370	1.23	15.3	0.96	15	Fabio Valenti	000560	2024	1	2	4	Morning
7.32277e+18	2024-01-11 10:39:44	5			1972-09-14	Female	170	63	21.8	Right	SECOND TESTING 30 min	Erector Spin	Lateral	Sitting	Left	Relaxed	17.1	372	1.25	15.2	0.96	15	Fabio Valenti	000560	2024	1	2	4	Morning
7.32277e+18	2024-01-11 10:40:08	1			1972-09-14	Female	170	63	21.8	Right	SECOND TESTING 30 min	Erector Spin	Lateral	Sitting	Right	Relaxed	17.4	375	1.18	14.1	0.87	15	Fabio Valenti	000560	2024	1	2	4	Morning
7.32277e+18	2024-01-11 10:40:09	2			1972-09-14	Female	170	63	21.8	Right	SECOND TESTING 30 min	Erector Spin	Lateral	Sitting	Right	Relaxed	17.2	375	1.16	14.2	0.88	15	Fabio Valenti	000560	2024	1	2	4	Morning
7.32277e+18	2024-01-11 10:40:10	3			1972-09-14	Female	170	63	21.8	Right	SECOND TESTING 30 min	Erector Spin	Lateral	Sitting	Right	Relaxed	17.2	376	1.15	14.2	0.88	15	Fabio Valenti	000560	2024	1	2	4	Morning
7.32277e+18	2024-01-11 10:40:11	4			1972-09-14	Female	170	63	21.8	Right	SECOND TESTING 30 min	Erector Spin	Lateral	Sitting	Right	Relaxed	17.3	378	1.14	14.1	0.87	15	Fabio Valenti	000560	2024	1	2	4	Morning
7.32277e+18	2024-01-11 10:40:11	5			1972-09-14	Female	170	63	21.8	Right	SECOND TESTING 30 min	Erector Spin	Lateral	Sitting	Right	Relaxed	17.3	377	1.12	14.1	0.87	15	Fabio Valenti	000560	2024	1	2	4	Morning
7.32313e+18	2024-01-12 10:02:59	1			1972-09-14	Female	170	63	21.8	Right	THIRD TEST 24h	Erector Spin	Lateral	Lying	Left	Relaxed	13	223	1.26	27.1	1.67	15	Fabio Valenti	000560	2024	1	2	5	Morning
7.32313e+18	2024-01-12 10:02:59	2			1972-09-14	Female	170	63	21.8	Right	THIRD TEST 24h	Erector Spin	Lateral	Lying	Left	Relaxed	13.1	225	1.28	27.2	1.68	15	Fabio Valenti	000560	2024	1	2	5	Morning
7.32313e+18	2024-01-12 10:03:00	3			1972-09-14	Female	170	63	21.8	Right	THIRD TEST 24h	Erector Spin	Lateral	Lying	Left	Relaxed	13.3	226	1.27	26.9	1.67	15	Fabio Valenti	000560	2024	1	2	5	Morning
7.32313e+18	2024-01-12 10:03:03	4			1972-09-14	Female	170	63	21.8	Right	THIRD TEST 24h	Erector Spin	Lateral	Lying	Left	Relaxed	13.3	227	1.27	27	1.67	15	Fabio Valenti	000560	2024	1	2	5	Morning
7.32313e+18	2024-01-12 10:03:03	5			1972-09-14	Female	170	63	21.8	Right	THIRD TEST 24h	Erector Spin	Lateral	Lying	Left	Relaxed	13.3	227	1.26	26.8	1.67	15	Fabio Valenti	000560	2024	1	2	5	Morning
7.32313e+18	2024-01-12 10:03:12	1			1972-09-14	Female	170	63	21.8	Right	THIRD TEST 24h	Erector Spin	Lateral	Lying	Right	Relaxed	16.3	306	1.64	21.5	1.37	15	Fabio Valenti	000560	2024	1	2	5	Morning
7.32313e+18	2024-01-12 10:03:12	2			1972-09-14	Female	170	63	21.8	Right	THIRD TEST 24h	Erector Spin	Lateral	Lying	Right	Relaxed	16	315	1.62	21.2	1.35	15	Fabio Valenti	000560	2024	1	2	5	Morning
7.32313e+18	2024-01-12 10:03:13	3			1972-09-14	Female	170	63	21.8	Right	THIRD TEST 24h	Erector Spin	Lateral	Lying	Right	Relaxed	16.2	319	1.64	21.2	1.35	15	Fabio Valenti	000560	2024	1	2	5	Morning
7.32313e+18	2024-01-12 10:03:14	4			1972-09-14	Female	170	63	21.8	Right	THIRD TEST 24h	Erector Spin	Lateral	Lying	Right	Relaxed	16.1	318	1.68	21.2	1.35	15	Fabio Valenti	000560	2024	1	2	5	Morning
7.32313e+18	2024-01-12 10:03:15	5			1972-09-14	Female	170	63	21.8	Right	THIRD TEST 24h	Erector Spin	Lateral	Lying	Right	Relaxed	16.1	324	1.65	20.8	1.33	15	Fabio Valenti	000560	2024	1	2	5	Morning
7.32313e+18	2024-01-12 10:03:51	1			1972-09-14	Female	170	63	21.8	Right	THIRD TEST 24h	Erector Spin	Lateral	Sitting	Left	Relaxed	17	349	1.25	15.4	0.96	15	Fabio Valenti	000560	2024	1	2	5	Morning
7.32313e+18	2024-01-12 10:03:52	2			1972-09-14	Female	170	63	21.8	Right	THIRD TEST 24h	Erector Spin	Lateral	Sitting	Left	Relaxed	17	351	1.22	15.2	0.95	15	Fabio Valenti	000560	2024	1	2	5	Morning
7.32313e+18	2024-01-12 10:03:53	3			1972-09-14	Female	170	63	21.8	Right	THIRD TEST 24h	Erector Spin	Lateral	Sitting	Left	Relaxed	17.1	353	1.21	15.2	0.95	15	Fabio Valenti	000560	2024	1	2	5	Morning
7.32313e+18	2024-01-12 10:03:53	4			1972-09-14	Female	170	63	21.8	Right	THIRD TEST 24h	Erector Spin	Lateral	Sitting	Left	Relaxed	17.1	354	1.21	15.1	0.94	15	Fabio Valenti	000560	2024	1	2	5	Morning
7.32313e+18	2024-01-12 10:03:54	5			1972-09-14	Female	170	63	21.8	Right	THIRD TEST 24h	Erector Spin	Lateral	Sitting	Left	Relaxed	16.9	352	1.19	15.3	0.96	15	Fabio Valenti	000560	2024	1	2	5	Morning
7.32314e+18	2024-01-12 10:04:25	1			1972-09-14	Female	170	63	21.8	Right	THIRD TEST 24h	Erector Spin	Lateral	Sitting	Right	Relaxed	17.9	391	1.4	13.8	0.87	15	Fabio Valenti	000560	2024	1	2	5	Morning
7.32314e+18	2024-01-12 10:04:26	2			1972-09-14	Female	170	63	21.8	Right	THIRD TEST 24h	Erector Spin	Lateral	Sitting	Right	Relaxed	17.6	384	1.32	14.3	0.9	15	Fabio Valenti	000560	2024	1	2	5	Morning
7.32314e+18	2024-01-12 10:04:27	3			1972-09-14	Female	170	63	21.8	Right	THIRD TEST 24h	Erector Spin	Lateral	Sitting	Right	Relaxed	17.6	387	1.32	14.1	0.89	15	Fabio Valenti	000560	2024	1	2	5	Morning
7.32314e+18	2024-01-12 10:04:28	4			1972-09-14	Female	170	63	21.8	Right	THIRD TEST 24h	Erector Spin	Lateral	Sitting	Right	Relaxed	17.7	382	1.32	14.2	0.89	15	Fabio Valenti	000560	2024	1	2	5	Morning
7.32314e+18	2024-01-12 10:04:28	5			1972-09-14	Female	170	63	21.8	Right	THIRD TEST 24h	Erector Spin	Lateral	Sitting	Right	Relaxed	17.9	389	1.31	14	0.88	15	Fabio Valenti	000560	2024	1	2	5	Morning
7.32431e+18	2024-01-15 14:02:39	1			1991-06-25	Male	185	83	24.3	Right	FIRST TEST	Erector Spin	Lateral	Lying	Left	Relaxed	20.6	509	1.24	10.3	0.66	15	Fabio Valenti	000560	2024	1	3	1	Day
7.32431e+18	2024-01-15 14:02:40	2			1991-06-25	Male	185	83	24.3	Right	FIRST TEST	Erector Spin	Lateral	Lying	Left	Relaxed	20.7	512	1.23	10.3	0.67	15	Fabio Valenti	000560	2024	1	3	1	Day
7.32431e+18	2024-01-15 14:02:40	3			1991-06-25	Male	185	83	24.3	Right	FIRST TEST	Erector Spin	Lateral	Lying	Left	Relaxed	20.7	517	1.21	10.2	0.66	15	Fabio Valenti	000560	2024	1	3	1	Day
7.32431e+18	2024-01-15 14:02:41	4			1991-06-25	Male	185	83	24.3	Right	FIRST TEST	Erector Spin	Lateral	Lying	Left	Relaxed	20.9	525	1.2	10.1	0.65	15	Fabio Valenti	000560	2024	1	3	1	Day
7.32431e+18	2024-01-15 14:02:42	5			1991-06-25	Male	185	83	24.3	Right	FIRST TEST	Erector Spin	Lateral	Lying	Left	Relaxed	21	534	1.21	10.1	0.66	15	Fabio Valenti	000560	2024	1	3	1	Day
7.32431e+18	2024-01-15 14:02:52	1			1991-06-25	Male	185	83	24.3	Right	FIRST TEST	Erector Spin	Lateral	Lying	Right	Relaxed	22.4	671	1.11	7.7	0.52	15	Fabio Valenti	000560	2024	1	3	1	Day
7.32431e+18	2024-01-15 14:02:52	2			1991-06-25	Male	185	83	24.3	Right	FIRST TEST	Erector Spin	Lateral	Lying	Right	Relaxed	22.5	668	1.12	7.8	0.52	15	Fabio Valenti	000560	2024	1	3	1	Day
7.32431e+18	2024-01-15 14:02:53	3			1991-06-25	Male	185	83	24.3	Right	FIRST TEST	Erector Spin	Lateral	Lying	Right	Relaxed	22.3	656	1.17	7.9	0.53	15	Fabio Valenti	000560	2024	1	3	1	Day
7.32431e+18	2024-01-15 14:02:54	4			1991-06-25	Male	185	83	24.3	Right	FIRST TEST	Erector Spin	Lateral	Lying	Right	Relaxed	22.4	661	1.15	7.9	0.53	15	Fabio Valenti	000560	2024	1	3	1	Day
7.32431e+18	2024-01-15 14:02:55	5			1991-06-25	Male	185	83	24.3	Right	FIRST TEST	Erector Spin	Lateral	Lying	Right	Relaxed	22.7	662	1.13	7.8	0.52	15	Fabio Valenti	000560	2024	1	3	1	Day
7.32431e+18	2024-01-15 14:03:23	1			1991-06-25	Male	185	83	24.3	Right	FIRST TEST	Erector Spin	Lateral	Sitting	Left	Relaxed	25.1	717	0.94	7.3	0.49	15	Fabio Valenti	000560	2024	1	3	1	Day
7.32431e+18	2024-01-15 14:03:24	2			1991-06-25	Male	185	83	24.3	Right	FIRST TEST	Erector Spin	Lateral	Sitting	Left	Relaxed	25.3	726	0.95	7.2	0.49	15	Fabio Valenti	000560	2024	1	3	1	Day
7.32431e+18	2024-01-15 14:03:25	3			1991-06-25	Male	185	83	24.3	Right	FIRST TEST	Erector Spin	Lateral	Sitting	Left	Relaxed	25.3	728	0.94	7.2	0.49	15	Fabio Valenti	000560	2024	1	3	1	Day
7.32431e+18	2024-01-15 14:03:25	4			1991-06-25	Male	185	83	24.3	Right	FIRST TEST	Erector Spin	Lateral	Sitting	Left	Relaxed	25.4	730	0.94	7.2	0.49	15	Fabio Valenti	000560	2024	1	3	1	Day
7.32431e+18	2024-01-15 14:03:26	5			1991-06-25	Male	185	83	24.3	Right	FIRST TEST	Erector Spin	Lateral	Sitting	Left	Relaxed	25.2	723	0.98	7.2	0.49	15	Fabio Valenti	000560	2024	1	3	1	Day
7.32431e+18	2024-01-15 14:03:35	1			1991-06-25	Male	185	83	24.3	Right	FIRST TEST	Erector Spin	Lateral	Sitting	Right	Relaxed	25.2	731	0.85	7.2	0.48	15	Fabio Valenti	000560	2024	1	3	1	Day
7.32431e+18	2024-01-15 14:03:35	2			1991-06-25	Male	185	83	24.3	Right	FIRST TEST	Erector Spin	Lateral	Sitting	Right	Relaxed	25.2	733	0.82	7.1	0.48	15	Fabio Valenti	000560	2024	1	3	1	Day
7.32431e+18	2024-01-15 14:03:36	3			1991-06-25	Male	185	83	24.3	Right	FIRST TEST	Erector Spin	Lateral	Sitting	Right	Relaxed	25.1	728	0.87	7.2	0.49	15	Fabio Valenti	000560	2024	1	3	1	Day
7.32431e+18	2024-01-15 14:03:37	4			1991-06-25	Male	185	83	24.3	Right	FIRST TEST	Erector Spin	Lateral	Sitting	Right	Relaxed	25.4	746	0.88	7.1	0.48	15	Fabio Valenti	000560	2024	1	3	1	Day
7.32431e+18	2024-01-15 14:03:38	5			1991-06-25	Male	185	83	24.3	Right	FIRST TEST	Erector Spin	Lateral	Sitting	Right	Relaxed	25.2	740	0.87	7.1	0.48	15	Fabio Valenti	000560	2024	1	3	1	Day
7.32432e+18	2024-01-15 14:32:21	1			1991-06-25	Male	185	83	24.3	Right	SECOND TESTING 30 min	Erector Spin	Lateral	Lying	Left	Relaxed	17.6	353	1.39	15.7	0.99	15	Fabio Valenti	000560	2024	1	3	1	Day
7.32432e+18	2024-01-15 14:32:21	2			1991-06-25	Male	185	83	24.3	Right	SECOND TESTING 30 min	Erector Spin	Lateral	Lying	Left	Relaxed	17.7	356	1.33	15.4	0.97	15	Fabio Valenti	000560	2024	1	3	1	Day
7.32432e+18	2024-01-15 14:32:22	3			1991-06-25	Male	185	83	24.3	Right	SECOND TESTING 30 min	Erector Spin	Lateral	Lying	Left	Relaxed	17.5	352	1.32	15.6	0.99	15	Fabio Valenti	000560	2024	1	3	1	Day
7.32432e+18	2024-01-15 14:32:23	4			1991-06-25	Male	185	83	24.3	Right	SECOND TESTING 30 min	Erector Spin	Lateral	Lying	Left	Relaxed	17.5	350	1.29	15.7	0.99	15	Fabio Valenti	000560	2024	1	3	1	Day
7.32432e+18	2024-01-15 14:32:24	5			1991-06-25	Male	185	83	24.3	Right	SECOND TESTING 30 min	Erector Spin	Lateral	Lying	Left	Relaxed	17.4	350	1.3	15.7	0.99	15	Fabio Valenti	000560	2024	1	3	1	Day
7.32432e+18	2024-01-15 14:32:46	1			1991-06-25	Male	185	83	24.3	Right	SECOND TESTING 30 min	Erector Spin	Lateral	Lying	Right	Relaxed	16.8	355	1.54	15.8	1.01	15	Fabio Valenti	000560	2024	1	3	1	Day
7.32432e+18	2024-01-15 14:32:47	2			1991-06-25	Male	185	83	24.3	Right	SECOND TESTING 30 min	Erector Spin	Lateral	Lying	Right	Relaxed	16.7	361	1.54	15.5	0.99	15	Fabio Valenti	000560	2024	1	3	1	Day
7.32432e+18	2024-01-15 14:32:48	3			1991-06-25	Male	185	83	24.3	Right	SECOND TESTING 30 min	Erector Spin	Lateral	Lying	Right	Relaxed	16.8	364	1.53	15.4	0.98	15	Fabio Valenti	000560	2024	1	3	1	Day
7.32432e+18	2024-01-15 14:32:48	4			1991-06-25	Male	185	83	24.3	Right	SECOND TESTING 30 min	Erector Spin	Lateral	Lying	Right	Relaxed	16.7	367	1.51	15.2	0.97	15	Fabio Valenti	000560	2024	1	3	1	Day
7.32432e+18	2024-01-15 14:32:49	5			1991-06-25	Male	185	83	24.3	Right	SECOND TESTING 30 min	Erector Spin	Lateral	Lying	Right	Relaxed	16.8	369	1.49	15.1	0.97	15	Fabio Valenti	000560	2024	1	3	1	Day
7.32432e+18	2024-01-15 14:33:13	1			1991-06-25	Male	185	83	24.3	Right	SECOND TESTING 30 min	Erector Spin	Lateral	Sitting	Left	Relaxed	28.8	797	0.97	6	0.43	15	Fabio Valenti	000560	2024	1	3	1	Day
7.32432e+18	2024-01-15 14:33:14	2			1991-06-25	Male	185	83	24.3	Right	SECOND TESTING 30 min	Erector Spin	Lateral	Sitting	Left	Relaxed	28.1	795	0.99	5.9	0.42	15	Fabio Valenti	000560	2024	1	3	1	Day
7.32432e+18	2024-01-15 14:33:14	3			1991-06-25	Male	185	83	24.3	Right	SECOND TESTING 30 min	Erector Spin	Lateral	Sitting	Left	Relaxed	27.6	786	1	6.1	0.44	15	Fabio Valenti	000560	2024	1	3	1	Day
7.32432e+18	2024-01-15 14:33:15	4			1991-06-25	Male	185	83	24.3	Right	SECOND TESTING 30 min	Erector Spin	Lateral	Sitting	Left	Relaxed	27.9	792	1	5.9	0.42	15	Fabio Valenti	000560	2024	1	3	1	Day
7.32432e+18	2024-01-15 14:33:16	5			1991-06-25	Male	185	83	24.3	Right	SECOND TESTING 30 min	Erector Spin	Lateral	Sitting	Left	Relaxed	27.9	800	0.97	5.9	0.42	15	Fabio Valenti	000560	2024	1	3	1	Day
7.32432e+18	2024-01-15 14:33:54	1			1991-06-25	Male	185	83	24.3	Right	SECOND TESTING 30 min	Erector Spin	Lateral	Sitting	Right	Relaxed	26.7	852	0.71	5.9	0.41	15	Fabio Valenti	000560	2024	1	3	1	Day
7.32432e+18	2024-01-15 14:33:54	2			1991-06-25	Male	185	83	24.3	Right	SECOND TESTING 30 min	Erector Spin	Lateral	Sitting	Right	Relaxed	26.4	853	0.69	5.9	0.41	15	Fabio Valenti	000560	2024	1	3	1	Day
7.32432e+18	2024-01-15 14:33:55	3			1991-06-25	Male	185	83	24.3	Right	SECOND TESTING 30 min	Erector Spin	Lateral	Sitting	Right	Relaxed	26.6	858	0.72	5.8	0.41	15	Fabio Valenti	000560	2024	1	3	1	Day
7.32432e+18	2024-01-15 14:33:56	4			1991-06-25	Male	185	83	24.3	Right	SECOND TESTING 30 min	Erector Spin	Lateral	Sitting	Right	Relaxed	26.4	854	0.71	5.9	0.41	15	Fabio Valenti	000560	2024	1	3	1	Day
7.32432e+18	2024-01-15 14:33:57	5			1991-06-25	Male	185	83	24.3	Right	SECOND TESTING 30 min	Erector Spin	Lateral	Sitting	Right	Relaxed	26.4	861	0.71	5.8	0.41	15	Fabio Valenti	000560	2024	1	3	1	Day
7.32468e+18	2024-01-16 14:01:18	1			1991-06-25	Male	185	83	24.3	Right	THIRD TEST 24h	Erector Spin	Lateral	Lying	Left	Relaxed	15.1	329	2.03	17.2	1.08	15	Fabio Valenti	000560	2024	1	3	2	Day
7.32468e+18	2024-01-16 14:01:19	2			1991-06-25	Male	185	83	24.3	Right	THIRD TEST 24h	Erector Spin	Lateral	Lying	Left	Relaxed	15	339	2.07	16.7	1.05	15	Fabio Valenti	000560	2024	1	3	2	Day
7.32468e+18	2024-01-16 14:01:19	3			1991-06-25	Male	185	83	24.3	Right	THIRD TEST 24h	Erector Spin	Lateral	Lying	Left	Relaxed	15.1	343	2.09	16.4	1.03	15	Fabio Valenti	000560	2024	1	3	2	Day
7.32468e+18	2024-01-16 14:01:20	4			1991-06-25	Male	185	83	24.3	Right	THIRD TEST 24h	Erector Spin	Lateral	Lying	Left	Relaxed	15	346	2.07	16.2	1.02	15	Fabio Valenti	000560	2024	1	3	2	Day
7.32468e+18	2024-01-16 14:01:21	5			1991-06-25	Male	185	83	24.3	Right	THIRD TEST 24h	Erector Spin	Lateral	Lying	Left	Relaxed	15.1	349	2.07	16.1	1.02	15	Fabio Valenti	000560	2024	1	3	2	Day
7.32468e+18	2024-01-16 14:01:30	1			1991-06-25	Male	185	83	24.3	Right	THIRD TEST 24h	Erector Spin	Lateral	Lying	Right	Relaxed	16.5	378	2.09	14.2	0.9	15	Fabio Valenti	000560	2024	1	3	2	Day
7.32468e+18	2024-01-16 14:01:31	2			1991-06-25	Male	185	83	24.3	Right	THIRD TEST 24h	Erector Spin	Lateral	Lying	Right	Relaxed	16.5	384	2.02	14.1	0.9	15	Fabio Valenti	000560	2024	1	3	2	Day
7.32468e+18	2024-01-16 14:01:32	3			1991-06-25	Male	185	83	24.3	Right	THIRD TEST 24h	Erector Spin	Lateral	Lying	Right	Relaxed	16.3	394	2.04	13.9	0.89	15	Fabio Valenti	000560	2024	1	3	2	Day
7.32468e+18	2024-01-16 14:01:32	4			1991-06-25	Male	185	83	24.3	Right	THIRD TEST 24h	Erector Spin	Lateral	Lying	Right	Relaxed	16.8	389	2.01	13.9	0.88	15	Fabio Valenti	000560	2024	1	3	2	Day
7.32468e+18	2024-01-16 14:01:33	5			1991-06-25	Male	185	83	24.3	Right	THIRD TEST 24h	Erector Spin	Lateral	Lying	Right	Relaxed	16.7	399	2	13.9	0.89	15	Fabio Valenti	000560	2024	1	3	2	Day
7.32468e+18	2024-01-16 14:01:58	1			1991-06-25	Male	185	83	24.3	Right	THIRD TEST 24h	Erector Spin	Lateral	Sitting	Left	Relaxed	24	664	1.06	7.8	0.52	15	Fabio Valenti	000560	2024	1	3	2	Day
7.32468e+18	2024-01-16 14:01:59	2			1991-06-25	Male	185	83	24.3	Right	THIRD TEST 24h	Erector Spin	Lateral	Sitting	Left	Relaxed	24	671	1.05	7.8	0.52	15	Fabio Valenti	000560	2024	1	3	2	Day
7.32468e+18	2024-01-16 14:01:59	3			1991-06-25	Male	185	83	24.3	Right	THIRD TEST 24h	Erector Spin	Lateral	Sitting	Left	Relaxed	23.8	673	1.05	7.8	0.52	15	Fabio Valenti	000560	2024	1	3	2	Day
7.32468e+18	2024-01-16 14:02:00	4			1991-06-25	Male	185	83	24.3	Right	THIRD TEST 24h	Erector Spin	Lateral	Sitting	Left	Relaxed	23.8	671	1.06	7.8	0.52	15	Fabio Valenti	000560	2024	1	3	2	Day
7.32468e+18	2024-01-16 14:02:01	5			1991-06-25	Male	185	83	24.3	Right	THIRD TEST 24h	Erector Spin	Lateral	Sitting	Left	Relaxed	23.7	677	1.05	7.8	0.52	15	Fabio Valenti	000560	2024	1	3	2	Day
7.32468e+18	2024-01-16 14:02:09	1			1991-06-25	Male	185	83	24.3	Right	THIRD TEST 24h	Erector Spin	Lateral	Sitting	Right	Relaxed	24	668	0.9	7.9	0.52	15	Fabio Valenti	000560	2024	1	3	2	Day
7.32468e+18	2024-01-16 14:02:09	2			1991-06-25	Male	185	83	24.3	Right	THIRD TEST 24h	Erector Spin	Lateral	Sitting	Right	Relaxed	23.9	672	0.89	7.9	0.52	15	Fabio Valenti	000560	2024	1	3	2	Day
7.32468e+18	2024-01-16 14:02:10	3			1991-06-25	Male	185	83	24.3	Right	THIRD TEST 24h	Erector Spin	Lateral	Sitting	Right	Relaxed	23.8	675	0.87	7.9	0.52	15	Fabio Valenti	000560	2024	1	3	2	Day
7.32468e+18	2024-01-16 14:02:11	4			1991-06-25	Male	185	83	24.3	Right	THIRD TEST 24h	Erector Spin	Lateral	Sitting	Right	Relaxed	23.9	673	0.87	7.9	0.52	15	Fabio Valenti	000560	2024	1	3	2	Day
7.32468e+18	2024-01-16 14:02:12	5			1991-06-25	Male	185	83	24.3	Right	THIRD TEST 24h	Erector Spin	Lateral	Sitting	Right	Relaxed	24	671	0.84	7.9	0.52	15	Fabio Valenti	000560	2024	1	3	2	Day
7.32279e+18	2024-01-11 11:28:12	1			1975-12-07	Female	162	57	21.7	Right	FIRST TEST	Erector Spin	Lateral	Lying	Left	Relaxed	15.2	314	1.43	17.5	1.08	15	Fabio Valenti	000560	2024	1	2	4	Morning
7.32279e+18	2024-01-11 11:28:13	2			1975-12-07	Female	162	57	21.7	Right	FIRST TEST	Erector Spin	Lateral	Lying	Left	Relaxed	15.1	317	1.45	17.4	1.08	15	Fabio Valenti	000560	2024	1	2	4	Morning
7.32279e+18	2024-01-11 11:28:14	3			1975-12-07	Female	162	57	21.7	Right	FIRST TEST	Erector Spin	Lateral	Lying	Left	Relaxed	15.1	318	1.42	17.3	1.07	15	Fabio Valenti	000560	2024	1	2	4	Morning
7.32279e+18	2024-01-11 11:28:15	4			1975-12-07	Female	162	57	21.7	Right	FIRST TEST	Erector Spin	Lateral	Lying	Left	Relaxed	15.2	321	1.42	17.3	1.07	15	Fabio Valenti	000560	2024	1	2	4	Morning
7.32279e+18	2024-01-11 11:28:15	5			1975-12-07	Female	162	57	21.7	Right	FIRST TEST	Erector Spin	Lateral	Lying	Left	Relaxed	15.3	324	1.41	17.1	1.06	15	Fabio Valenti	000560	2024	1	2	4	Morning
7.32279e+18	2024-01-11 11:28:30	1			1975-12-07	Female	162	57	21.7	Right	FIRST TEST	Erector Spin	Lateral	Lying	Right	Relaxed	12.8	248	1.29	22.1	1.32	15	Fabio Valenti	000560	2024	1	2	4	Morning
7.32279e+18	2024-01-11 11:28:31	2			1975-12-07	Female	162	57	21.7	Right	FIRST TEST	Erector Spin	Lateral	Lying	Right	Relaxed	12.8	243	1.27	22.2	1.33	15	Fabio Valenti	000560	2024	1	2	4	Morning
7.32279e+18	2024-01-11 11:28:31	3			1975-12-07	Female	162	57	21.7	Right	FIRST TEST	Erector Spin	Lateral	Lying	Right	Relaxed	12.7	243	1.26	22.1	1.32	15	Fabio Valenti	000560	2024	1	2	4	Morning
7.32279e+18	2024-01-11 11:28:32	4			1975-12-07	Female	162	57	21.7	Right	FIRST TEST	Erector Spin	Lateral	Lying	Right	Relaxed	12.7	243	1.26	22.1	1.32	15	Fabio Valenti	000560	2024	1	2	4	Morning
7.32279e+18	2024-01-11 11:28:33	5			1975-12-07	Female	162	57	21.7	Right	FIRST TEST	Erector Spin	Lateral	Lying	Right	Relaxed	12.8	244	1.26	21.9	1.3	15	Fabio Valenti	000560	2024	1	2	4	Morning
7.32279e+18	2024-01-11 11:29:04	1			1975-12-07	Female	162	57	21.7	Right	FIRST TEST	Erector Spin	Lateral	Sitting	Left	Relaxed	17.6	452	1.09	11.8	0.74	15	Fabio Valenti	000560	2024	1	2	4	Morning
7.32279e+18	2024-01-11 11:29:05	2			1975-12-07	Female	162	57	21.7	Right	FIRST TEST	Erector Spin	Lateral	Sitting	Left	Relaxed	17.4	456	1.06	11.7	0.74	15	Fabio Valenti	000560	2024	1	2	4	Morning
7.32279e+18	2024-01-11 11:29:05	3			1975-12-07	Female	162	57	21.7	Right	FIRST TEST	Erector Spin	Lateral	Sitting	Left	Relaxed	17.3	455	1.06	11.7	0.74	15	Fabio Valenti	000560	2024	1	2	4	Morning
7.32279e+18	2024-01-11 11:29:06	4			1975-12-07	Female	162	57	21.7	Right	FIRST TEST	Erector Spin	Lateral	Sitting	Left	Relaxed	17.3	455	1.03	11.9	0.75	15	Fabio Valenti	000560	2024	1	2	4	Morning
7.32279e+18	2024-01-11 11:29:07	5			1975-12-07	Female	162	57	21.7	Right	FIRST TEST	Erector Spin	Lateral	Sitting	Left	Relaxed	17.4	457	1.04	11.8	0.74	15	Fabio Valenti	000560	2024	1	2	4	Morning
7.32279e+18	2024-01-11 11:29:18	1			1975-12-07	Female	162	57	21.7	Right	FIRST TEST	Erector Spin	Lateral	Sitting	Right	Relaxed	20.1	549	1.16	9.8	0.63	15	Fabio Valenti	000560	2024	1	2	4	Morning
7.32279e+18	2024-01-11 11:29:19	2			1975-12-07	Female	162	57	21.7	Right	FIRST TEST	Erector Spin	Lateral	Sitting	Right	Relaxed	20	563	1.13	9.7	0.63	15	Fabio Valenti	000560	2024	1	2	4	Morning
7.32279e+18	2024-01-11 11:29:19	3			1975-12-07	Female	162	57	21.7	Right	FIRST TEST	Erector Spin	Lateral	Sitting	Right	Relaxed	19.9	562	1.12	9.9	0.64	15	Fabio Valenti	000560	2024	1	2	4	Morning
7.32279e+18	2024-01-11 11:29:20	4			1975-12-07	Female	162	57	21.7	Right	FIRST TEST	Erector Spin	Lateral	Sitting	Right	Relaxed	20.1	567	1.11	9.7	0.63	15	Fabio Valenti	000560	2024	1	2	4	Morning
7.32279e+18	2024-01-11 11:29:21	5			1975-12-07	Female	162	57	21.7	Right	FIRST TEST	Erector Spin	Lateral	Sitting	Right	Relaxed	19.9	569	1.12	9.6	0.62	15	Fabio Valenti	000560	2024	1	2	4	Morning
7.32279e+18	2024-01-11 12:03:57	1			1975-12-07	Female	162	57	21.7	Right	SECOND TESTING 30 min	Erector Spin	Lateral	Lying	Left	Relaxed	17.1	350	1.33	16	1	15	Fabio Valenti	000560	2024	1	2	4	Day
7.32279e+18	2024-01-11 12:03:57	2			1975-12-07	Female	162	57	21.7	Right	SECOND TESTING 30 min	Erector Spin	Lateral	Lying	Left	Relaxed	17.3	353	1.32	15.8	0.99	15	Fabio Valenti	000560	2024	1	2	4	Day
7.32279e+18	2024-01-11 12:03:58	3			1975-12-07	Female	162	57	21.7	Right	SECOND TESTING 30 min	Erector Spin	Lateral	Lying	Left	Relaxed	17.2	358	1.31	15.7	0.98	15	Fabio Valenti	000560	2024	1	2	4	Day
7.32279e+18	2024-01-11 12:03:59	4			1975-12-07	Female	162	57	21.7	Right	SECOND TESTING 30 min	Erector Spin	Lateral	Lying	Left	Relaxed	17.2	359	1.29	15.7	0.98	15	Fabio Valenti	000560	2024	1	2	4	Day
7.32279e+18	2024-01-11 12:03:59	5			1975-12-07	Female	162	57	21.7	Right	SECOND TESTING 30 min	Erector Spin	Lateral	Lying	Left	Relaxed	17.3	359	1.27	15.6	0.98	15	Fabio Valenti	000560	2024	1	2	4	Day
7.32279e+18	2024-01-11 12:04:11	1			1975-12-07	Female	162	57	21.7	Right	SECOND TESTING 30 min	Erector Spin	Lateral	Lying	Right	Relaxed	13.9	258	1.21	20.3	1.21	15	Fabio Valenti	000560	2024	1	2	4	Day
7.32279e+18	2024-01-11 12:04:12	2			1975-12-07	Female	162	57	21.7	Right	SECOND TESTING 30 min	Erector Spin	Lateral	Lying	Right	Relaxed	13.8	266	1.19	20.2	1.21	15	Fabio Valenti	000560	2024	1	2	4	Day
7.32279e+18	2024-01-11 12:04:12	3			1975-12-07	Female	162	57	21.7	Right	SECOND TESTING 30 min	Erector Spin	Lateral	Lying	Right	Relaxed	13.9	262	1.17	20.1	1.2	15	Fabio Valenti	000560	2024	1	2	4	Day
7.32279e+18	2024-01-11 12:04:13	4			1975-12-07	Female	162	57	21.7	Right	SECOND TESTING 30 min	Erector Spin	Lateral	Lying	Right	Relaxed	13.9	269	1.17	20.1	1.21	15	Fabio Valenti	000560	2024	1	2	4	Day
7.32279e+18	2024-01-11 12:04:14	5			1975-12-07	Female	162	57	21.7	Right	SECOND TESTING 30 min	Erector Spin	Lateral	Lying	Right	Relaxed	14	275	1.23	19.6	1.18	15	Fabio Valenti	000560	2024	1	2	4	Day
7.3228e+18	2024-01-11 12:05:18	1			1975-12-07	Female	162	57	21.7	Right	SECOND TESTING 30 min	Erector Spin	Lateral	Sitting	Left	Relaxed	17.1	452	1.15	11.6	0.73	15	Fabio Valenti	000560	2024	1	2	4	Day
7.3228e+18	2024-01-11 12:05:19	2			1975-12-07	Female	162	57	21.7	Right	SECOND TESTING 30 min	Erector Spin	Lateral	Sitting	Left	Relaxed	17	460	1.12	11.5	0.73	15	Fabio Valenti	000560	2024	1	2	4	Day
7.3228e+18	2024-01-11 12:05:19	3			1975-12-07	Female	162	57	21.7	Right	SECOND TESTING 30 min	Erector Spin	Lateral	Sitting	Left	Relaxed	17	468	1.1	11.4	0.72	15	Fabio Valenti	000560	2024	1	2	4	Day
7.3228e+18	2024-01-11 12:05:20	4			1975-12-07	Female	162	57	21.7	Right	SECOND TESTING 30 min	Erector Spin	Lateral	Sitting	Left	Relaxed	17	461	1.11	11.4	0.72	15	Fabio Valenti	000560	2024	1	2	4	Day
7.3228e+18	2024-01-11 12:05:21	5			1975-12-07	Female	162	57	21.7	Right	SECOND TESTING 30 min	Erector Spin	Lateral	Sitting	Left	Relaxed	17.1	461	1.09	11.4	0.72	15	Fabio Valenti	000560	2024	1	2	4	Day
7.3228e+18	2024-01-11 12:05:31	1			1975-12-07	Female	162	57	21.7	Right	SECOND TESTING 30 min	Erector Spin	Lateral	Sitting	Right	Relaxed	19.1	528	1.24	10.2	0.66	15	Fabio Valenti	000560	2024	1	2	4	Day
7.3228e+18	2024-01-11 12:05:32	2			1975-12-07	Female	162	57	21.7	Right	SECOND TESTING 30 min	Erector Spin	Lateral	Sitting	Right	Relaxed	19.2	543	1.23	10.2	0.66	15	Fabio Valenti	000560	2024	1	2	4	Day
7.3228e+18	2024-01-11 12:05:33	3			1975-12-07	Female	162	57	21.7	Right	SECOND TESTING 30 min	Erector Spin	Lateral	Sitting	Right	Relaxed	19	538	1.24	10.2	0.66	15	Fabio Valenti	000560	2024	1	2	4	Day
7.3228e+18	2024-01-11 12:05:34	4			1975-12-07	Female	162	57	21.7	Right	SECOND TESTING 30 min	Erector Spin	Lateral	Sitting	Right	Relaxed	19	529	1.2	10.4	0.67	15	Fabio Valenti	000560	2024	1	2	4	Day
7.3228e+18	2024-01-11 12:05:34	5			1975-12-07	Female	162	57	21.7	Right	SECOND TESTING 30 min	Erector Spin	Lateral	Sitting	Right	Relaxed	19	532	1.19	10.5	0.68	15	Fabio Valenti	000560	2024	1	2	4	Day
7.32315e+18	2024-01-12 10:45:00	1			1975-12-07	Female	162	57	21.7	Right	THIRD TEST 24h	Erector Spin	Lateral	Lying	Left	Relaxed	15.1	301	1.48	18.4	1.13	15	Fabio Valenti	000560	2024	1	2	5	Morning
7.32315e+18	2024-01-12 10:45:01	2			1975-12-07	Female	162	57	21.7	Right	THIRD TEST 24h	Erector Spin	Lateral	Lying	Left	Relaxed	15.3	307	1.45	18.1	1.11	15	Fabio Valenti	000560	2024	1	2	5	Morning
7.32315e+18	2024-01-12 10:45:02	3			1975-12-07	Female	162	57	21.7	Right	THIRD TEST 24h	Erector Spin	Lateral	Lying	Left	Relaxed	15.3	305	1.48	18.1	1.12	15	Fabio Valenti	000560	2024	1	2	5	Morning
7.32315e+18	2024-01-12 10:45:02	4			1975-12-07	Female	162	57	21.7	Right	THIRD TEST 24h	Erector Spin	Lateral	Lying	Left	Relaxed	15.3	305	1.47	18	1.1	15	Fabio Valenti	000560	2024	1	2	5	Morning
7.32315e+18	2024-01-12 10:45:03	5			1975-12-07	Female	162	57	21.7	Right	THIRD TEST 24h	Erector Spin	Lateral	Lying	Left	Relaxed	15.2	307	1.44	18	1.11	15	Fabio Valenti	000560	2024	1	2	5	Morning
7.32315e+18	2024-01-12 10:45:12	1			1975-12-07	Female	162	57	21.7	Right	THIRD TEST 24h	Erector Spin	Lateral	Lying	Right	Relaxed	17.3	368	1.75	15.3	0.96	15	Fabio Valenti	000560	2024	1	2	5	Morning
7.32315e+18	2024-01-12 10:45:13	2			1975-12-07	Female	162	57	21.7	Right	THIRD TEST 24h	Erector Spin	Lateral	Lying	Right	Relaxed	17.4	375	1.73	15.1	0.95	15	Fabio Valenti	000560	2024	1	2	5	Morning
7.32315e+18	2024-01-12 10:45:13	3			1975-12-07	Female	162	57	21.7	Right	THIRD TEST 24h	Erector Spin	Lateral	Lying	Right	Relaxed	17.4	377	1.69	15	0.95	15	Fabio Valenti	000560	2024	1	2	5	Morning
7.32315e+18	2024-01-12 10:45:14	4			1975-12-07	Female	162	57	21.7	Right	THIRD TEST 24h	Erector Spin	Lateral	Lying	Right	Relaxed	17.3	378	1.71	15.1	0.95	15	Fabio Valenti	000560	2024	1	2	5	Morning
7.32315e+18	2024-01-12 10:45:15	5			1975-12-07	Female	162	57	21.7	Right	THIRD TEST 24h	Erector Spin	Lateral	Lying	Right	Relaxed	17.4	380	1.69	15	0.95	15	Fabio Valenti	000560	2024	1	2	5	Morning
7.32315e+18	2024-01-12 10:45:36	1			1975-12-07	Female	162	57	21.7	Right	THIRD TEST 24h	Erector Spin	Lateral	Sitting	Left	Relaxed	18.6	470	1.11	11.4	0.72	15	Fabio Valenti	000560	2024	1	2	5	Morning
7.32315e+18	2024-01-12 10:45:37	2			1975-12-07	Female	162	57	21.7	Right	THIRD TEST 24h	Erector Spin	Lateral	Sitting	Left	Relaxed	18.4	474	1.1	11.5	0.73	15	Fabio Valenti	000560	2024	1	2	5	Morning
7.32315e+18	2024-01-12 10:45:38	3			1975-12-07	Female	162	57	21.7	Right	THIRD TEST 24h	Erector Spin	Lateral	Sitting	Left	Relaxed	18.2	474	1.08	11.5	0.73	15	Fabio Valenti	000560	2024	1	2	5	Morning
7.32315e+18	2024-01-12 10:45:39	4			1975-12-07	Female	162	57	21.7	Right	THIRD TEST 24h	Erector Spin	Lateral	Sitting	Left	Relaxed	18.1	472	1.09	11.5	0.73	15	Fabio Valenti	000560	2024	1	2	5	Morning
7.32315e+18	2024-01-12 10:45:39	5			1975-12-07	Female	162	57	21.7	Right	THIRD TEST 24h	Erector Spin	Lateral	Sitting	Left	Relaxed	17.9	469	1.09	11.7	0.74	15	Fabio Valenti	000560	2024	1	2	5	Morning
7.32315e+18	2024-01-12 10:45:50	1			1975-12-07	Female	162	57	21.7	Right	THIRD TEST 24h	Erector Spin	Lateral	Sitting	Right	Relaxed	17.2	469	1.32	11.2	0.71	15	Fabio Valenti	000560	2024	1	2	5	Morning
7.32315e+18	2024-01-12 10:45:50	2			1975-12-07	Female	162	57	21.7	Right	THIRD TEST 24h	Erector Spin	Lateral	Sitting	Right	Relaxed	17.1	473	1.25	11.3	0.72	15	Fabio Valenti	000560	2024	1	2	5	Morning
7.32315e+18	2024-01-12 10:45:51	3			1975-12-07	Female	162	57	21.7	Right	THIRD TEST 24h	Erector Spin	Lateral	Sitting	Right	Relaxed	17.1	473	1.26	11.5	0.73	15	Fabio Valenti	000560	2024	1	2	5	Morning
7.32315e+18	2024-01-12 10:45:52	4			1975-12-07	Female	162	57	21.7	Right	THIRD TEST 24h	Erector Spin	Lateral	Sitting	Right	Relaxed	16.9	466	1.26	11.7	0.74	15	Fabio Valenti	000560	2024	1	2	5	Morning
7.32315e+18	2024-01-12 10:45:53	5			1975-12-07	Female	162	57	21.7	Right	THIRD TEST 24h	Erector Spin	Lateral	Sitting	Right	Relaxed	17	465	1.26	11.8	0.75	15	Fabio Valenti	000560	2024	1	2	5	Morning
7.33024e+18	2024-01-31 13:26:09	1			1996-08-29	Male	178	78	24.6	Right	FIRST TEST	Erector Spin	Lateral	Lying	Left	Relaxed	15.1	303	1.02	17.3	1.06	15	Fabio Valenti	000560	2024	1	5	3	Day
7.33024e+18	2024-01-31 13:26:09	2			1996-08-29	Male	178	78	24.6	Right	FIRST TEST	Erector Spin	Lateral	Lying	Left	Relaxed	15	305	0.97	17.2	1.05	15	Fabio Valenti	000560	2024	1	5	3	Day
7.33024e+18	2024-01-31 13:26:10	3			1996-08-29	Male	178	78	24.6	Right	FIRST TEST	Erector Spin	Lateral	Lying	Left	Relaxed	15	305	0.98	17.3	1.06	15	Fabio Valenti	000560	2024	1	5	3	Day
7.33024e+18	2024-01-31 13:26:11	4			1996-08-29	Male	178	78	24.6	Right	FIRST TEST	Erector Spin	Lateral	Lying	Left	Relaxed	15	305	0.97	17.4	1.07	15	Fabio Valenti	000560	2024	1	5	3	Day
7.33024e+18	2024-01-31 13:26:11	5			1996-08-29	Male	178	78	24.6	Right	FIRST TEST	Erector Spin	Lateral	Lying	Left	Relaxed	15	307	0.97	17.2	1.05	15	Fabio Valenti	000560	2024	1	5	3	Day
7.33024e+18	2024-01-31 13:27:21	1			1996-08-29	Male	178	78	24.6	Right	FIRST TEST	Erector Spin	Lateral	Lying	Right	Relaxed	15	295	0.95	17.6	1.06	15	Fabio Valenti	000560	2024	1	5	3	Day
7.33024e+18	2024-01-31 13:27:22	2			1996-08-29	Male	178	78	24.6	Right	FIRST TEST	Erector Spin	Lateral	Lying	Right	Relaxed	15	299	0.93	17.5	1.05	15	Fabio Valenti	000560	2024	1	5	3	Day
7.33024e+18	2024-01-31 13:27:23	3			1996-08-29	Male	178	78	24.6	Right	FIRST TEST	Erector Spin	Lateral	Lying	Right	Relaxed	15	299	0.9	17.3	1.04	15	Fabio Valenti	000560	2024	1	5	3	Day
7.33024e+18	2024-01-31 13:27:23	4			1996-08-29	Male	178	78	24.6	Right	FIRST TEST	Erector Spin	Lateral	Lying	Right	Relaxed	15	296	0.91	17.3	1.04	15	Fabio Valenti	000560	2024	1	5	3	Day
7.33024e+18	2024-01-31 13:27:24	5			1996-08-29	Male	178	78	24.6	Right	FIRST TEST	Erector Spin	Lateral	Lying	Right	Relaxed	15.1	302	0.91	17.3	1.04	15	Fabio Valenti	000560	2024	1	5	3	Day
7.33024e+18	2024-01-31 13:27:56	1			1996-08-29	Male	178	78	24.6	Right	FIRST TEST	Erector Spin	Lateral	Sitting	Left	Relaxed	19.6	518	0.83	10.6	0.68	15	Fabio Valenti	000560	2024	1	5	3	Day
7.33024e+18	2024-01-31 13:27:57	2			1996-08-29	Male	178	78	24.6	Right	FIRST TEST	Erector Spin	Lateral	Sitting	Left	Relaxed	19	524	0.87	10.6	0.68	15	Fabio Valenti	000560	2024	1	5	3	Day
7.33024e+18	2024-01-31 13:27:58	3			1996-08-29	Male	178	78	24.6	Right	FIRST TEST	Erector Spin	Lateral	Sitting	Left	Relaxed	18.6	517	0.88	10.9	0.7	15	Fabio Valenti	000560	2024	1	5	3	Day
7.33024e+18	2024-01-31 13:27:58	4			1996-08-29	Male	178	78	24.6	Right	FIRST TEST	Erector Spin	Lateral	Sitting	Left	Relaxed	19.1	522	0.87	10.7	0.69	15	Fabio Valenti	000560	2024	1	5	3	Day
7.33024e+18	2024-01-31 13:27:59	5			1996-08-29	Male	178	78	24.6	Right	FIRST TEST	Erector Spin	Lateral	Sitting	Left	Relaxed	18.9	522	0.86	10.7	0.69	15	Fabio Valenti	000560	2024	1	5	3	Day
7.33024e+18	2024-01-31 13:28:06	1			1996-08-29	Male	178	78	24.6	Right	FIRST TEST	Erector Spin	Lateral	Sitting	Right	Relaxed	18.5	476	0.9	11.3	0.71	15	Fabio Valenti	000560	2024	1	5	3	Day
7.33024e+18	2024-01-31 13:28:07	2			1996-08-29	Male	178	78	24.6	Right	FIRST TEST	Erector Spin	Lateral	Sitting	Right	Relaxed	18	476	0.87	11.4	0.72	15	Fabio Valenti	000560	2024	1	5	3	Day
7.33024e+18	2024-01-31 13:28:08	3			1996-08-29	Male	178	78	24.6	Right	FIRST TEST	Erector Spin	Lateral	Sitting	Right	Relaxed	18.1	481	0.87	11.5	0.73	15	Fabio Valenti	000560	2024	1	5	3	Day
7.33024e+18	2024-01-31 13:28:08	4			1996-08-29	Male	178	78	24.6	Right	FIRST TEST	Erector Spin	Lateral	Sitting	Right	Relaxed	17.9	466	0.88	11.7	0.74	15	Fabio Valenti	000560	2024	1	5	3	Day
7.33024e+18	2024-01-31 13:28:09	5			1996-08-29	Male	178	78	24.6	Right	FIRST TEST	Erector Spin	Lateral	Sitting	Right	Relaxed	17.9	470	0.86	11.7	0.74	15	Fabio Valenti	000560	2024	1	5	3	Day
7.33025e+18	2024-01-31 14:04:01	1			1996-08-29	Male	178	78	24.6	Right	SECOND TESTING 30 min	Erector Spin	Lateral	Lying	Left	Relaxed	14.9	291	1.07	17.7	1.07	15	Fabio Valenti	000560	2024	1	5	3	Day
7.33025e+18	2024-01-31 14:04:01	2			1996-08-29	Male	178	78	24.6	Right	SECOND TESTING 30 min	Erector Spin	Lateral	Lying	Left	Relaxed	14.9	293	1.03	17.4	1.05	15	Fabio Valenti	000560	2024	1	5	3	Day
7.33025e+18	2024-01-31 14:04:02	3			1996-08-29	Male	178	78	24.6	Right	SECOND TESTING 30 min	Erector Spin	Lateral	Lying	Left	Relaxed	14.9	297	1.03	17.4	1.05	15	Fabio Valenti	000560	2024	1	5	3	Day
7.33025e+18	2024-01-31 14:04:03	4			1996-08-29	Male	178	78	24.6	Right	SECOND TESTING 30 min	Erector Spin	Lateral	Lying	Left	Relaxed	15	300	1.03	17.1	1.03	15	Fabio Valenti	000560	2024	1	5	3	Day
7.33025e+18	2024-01-31 14:04:03	5			1996-08-29	Male	178	78	24.6	Right	SECOND TESTING 30 min	Erector Spin	Lateral	Lying	Left	Relaxed	15	301	1.02	17.1	1.03	15	Fabio Valenti	000560	2024	1	5	3	Day
7.33025e+18	2024-01-31 14:04:36	1			1996-08-29	Male	178	78	24.6	Right	SECOND TESTING 30 min	Erector Spin	Lateral	Lying	Right	Relaxed	14.6	255	0.81	18.6	1.08	15	Fabio Valenti	000560	2024	1	5	3	Day
7.33025e+18	2024-01-31 14:04:36	2			1996-08-29	Male	178	78	24.6	Right	SECOND TESTING 30 min	Erector Spin	Lateral	Lying	Right	Relaxed	14.6	263	0.81	18.1	1.05	15	Fabio Valenti	000560	2024	1	5	3	Day
7.33025e+18	2024-01-31 14:04:37	3			1996-08-29	Male	178	78	24.6	Right	SECOND TESTING 30 min	Erector Spin	Lateral	Lying	Right	Relaxed	14.6	262	0.8	18.2	1.06	15	Fabio Valenti	000560	2024	1	5	3	Day
7.33025e+18	2024-01-31 14:04:38	4			1996-08-29	Male	178	78	24.6	Right	SECOND TESTING 30 min	Erector Spin	Lateral	Lying	Right	Relaxed	14.6	263	0.8	18.2	1.06	15	Fabio Valenti	000560	2024	1	5	3	Day
7.33025e+18	2024-01-31 14:04:39	5			1996-08-29	Male	178	78	24.6	Right	SECOND TESTING 30 min	Erector Spin	Lateral	Lying	Right	Relaxed	14.6	264	0.81	18.2	1.06	15	Fabio Valenti	000560	2024	1	5	3	Day
7.33025e+18	2024-01-31 14:04:56	1			1996-08-29	Male	178	78	24.6	Right	SECOND TESTING 30 min	Erector Spin	Lateral	Sitting	Left	Relaxed	18.9	507	0.87	10.9	0.7	15	Fabio Valenti	000560	2024	1	5	3	Day
7.33025e+18	2024-01-31 14:04:57	2			1996-08-29	Male	178	78	24.6	Right	SECOND TESTING 30 min	Erector Spin	Lateral	Sitting	Left	Relaxed	19	517	0.85	10.7	0.69	15	Fabio Valenti	000560	2024	1	5	3	Day
7.33025e+18	2024-01-31 14:04:57	3			1996-08-29	Male	178	78	24.6	Right	SECOND TESTING 30 min	Erector Spin	Lateral	Sitting	Left	Relaxed	18.6	512	0.85	10.9	0.7	15	Fabio Valenti	000560	2024	1	5	3	Day
7.33025e+18	2024-01-31 14:04:58	4			1996-08-29	Male	178	78	24.6	Right	SECOND TESTING 30 min	Erector Spin	Lateral	Sitting	Left	Relaxed	18.5	512	0.86	10.9	0.7	15	Fabio Valenti	000560	2024	1	5	3	Day
7.33025e+18	2024-01-31 14:04:59	5			1996-08-29	Male	178	78	24.6	Right	SECOND TESTING 30 min	Erector Spin	Lateral	Sitting	Left	Relaxed	18.4	512	0.86	10.9	0.7	15	Fabio Valenti	000560	2024	1	5	3	Day
7.33025e+18	2024-01-31 14:05:23	1			1996-08-29	Male	178	78	24.6	Right	SECOND TESTING 30 min	Erector Spin	Lateral	Sitting	Right	Relaxed	18.9	465	0.89	11.4	0.72	15	Fabio Valenti	000560	2024	1	5	3	Day
7.33025e+18	2024-01-31 14:05:23	2			1996-08-29	Male	178	78	24.6	Right	SECOND TESTING 30 min	Erector Spin	Lateral	Sitting	Right	Relaxed	17.7	469	0.92	11.5	0.73	15	Fabio Valenti	000560	2024	1	5	3	Day
7.33025e+18	2024-01-31 14:05:24	3			1996-08-29	Male	178	78	24.6	Right	SECOND TESTING 30 min	Erector Spin	Lateral	Sitting	Right	Relaxed	17.7	461	0.91	12	0.76	15	Fabio Valenti	000560	2024	1	5	3	Day
7.33025e+18	2024-01-31 14:05:25	4			1996-08-29	Male	178	78	24.6	Right	SECOND TESTING 30 min	Erector Spin	Lateral	Sitting	Right	Relaxed	17.9	459	0.87	11.8	0.75	15	Fabio Valenti	000560	2024	1	5	3	Day
7.33025e+18	2024-01-31 14:05:25	5			1996-08-29	Male	178	78	24.6	Right	SECOND TESTING 30 min	Erector Spin	Lateral	Sitting	Right	Relaxed	18.3	471	0.89	11.5	0.73	15	Fabio Valenti	000560	2024	1	5	3	Day
7.33061e+18	2024-02-01 13:18:21	1			1996-08-29	Male	178	78	24.6	Right	THIRD TEST 24h	Erector Spin	Lateral	Lying	Left	Relaxed	15.3	309	1.16	17	1.04	15	Fabio Valenti	000560	2024	2	5	4	Day
7.33061e+18	2024-02-01 13:18:22	2			1996-08-29	Male	178	78	24.6	Right	THIRD TEST 24h	Erector Spin	Lateral	Lying	Left	Relaxed	15.3	315	1.12	16.8	1.04	15	Fabio Valenti	000560	2024	2	5	4	Day
7.33061e+18	2024-02-01 13:18:23	3			1996-08-29	Male	178	78	24.6	Right	THIRD TEST 24h	Erector Spin	Lateral	Lying	Left	Relaxed	15.4	315	1.1	16.8	1.03	15	Fabio Valenti	000560	2024	2	5	4	Day
7.33061e+18	2024-02-01 13:18:24	4			1996-08-29	Male	178	78	24.6	Right	THIRD TEST 24h	Erector Spin	Lateral	Lying	Left	Relaxed	15.5	322	1.08	16.5	1.02	15	Fabio Valenti	000560	2024	2	5	4	Day
7.33061e+18	2024-02-01 13:18:24	5			1996-08-29	Male	178	78	24.6	Right	THIRD TEST 24h	Erector Spin	Lateral	Lying	Left	Relaxed	15.6	328	1.12	16.2	1	15	Fabio Valenti	000560	2024	2	5	4	Day
7.33061e+18	2024-02-01 13:18:35	1			1996-08-29	Male	178	78	24.6	Right	THIRD TEST 24h	Erector Spin	Lateral	Lying	Right	Relaxed	14.5	253	0.87	19.2	1.13	15	Fabio Valenti	000560	2024	2	5	4	Day
7.33061e+18	2024-02-01 13:18:36	2			1996-08-29	Male	178	78	24.6	Right	THIRD TEST 24h	Erector Spin	Lateral	Lying	Right	Relaxed	14.5	248	0.84	19.1	1.12	15	Fabio Valenti	000560	2024	2	5	4	Day
7.33061e+18	2024-02-01 13:18:38	3			1996-08-29	Male	178	78	24.6	Right	THIRD TEST 24h	Erector Spin	Lateral	Lying	Right	Relaxed	14.5	249	0.82	19.1	1.12	15	Fabio Valenti	000560	2024	2	5	4	Day
7.33061e+18	2024-02-01 13:18:39	4			1996-08-29	Male	178	78	24.6	Right	THIRD TEST 24h	Erector Spin	Lateral	Lying	Right	Relaxed	14.5	249	0.81	19	1.11	15	Fabio Valenti	000560	2024	2	5	4	Day
7.33061e+18	2024-02-01 13:18:41	5			1996-08-29	Male	178	78	24.6	Right	THIRD TEST 24h	Erector Spin	Lateral	Lying	Right	Relaxed	14.4	248	0.82	19.3	1.13	15	Fabio Valenti	000560	2024	2	5	4	Day
7.33061e+18	2024-02-01 13:19:05	1			1996-08-29	Male	178	78	24.6	Right	THIRD TEST 24h	Erector Spin	Lateral	Sitting	Left	Relaxed	19.9	514	0.91	10.4	0.67	15	Fabio Valenti	000560	2024	2	5	4	Day
7.33061e+18	2024-02-01 13:19:05	2			1996-08-29	Male	178	78	24.6	Right	THIRD TEST 24h	Erector Spin	Lateral	Sitting	Left	Relaxed	19.6	525	0.87	10.5	0.68	15	Fabio Valenti	000560	2024	2	5	4	Day
7.33061e+18	2024-02-01 13:19:06	3			1996-08-29	Male	178	78	24.6	Right	THIRD TEST 24h	Erector Spin	Lateral	Sitting	Left	Relaxed	19.4	524	0.86	10.5	0.68	15	Fabio Valenti	000560	2024	2	5	4	Day
7.33061e+18	2024-02-01 13:19:07	4			1996-08-29	Male	178	78	24.6	Right	THIRD TEST 24h	Erector Spin	Lateral	Sitting	Left	Relaxed	19.3	523	0.85	10.5	0.68	15	Fabio Valenti	000560	2024	2	5	4	Day
7.33061e+18	2024-02-01 13:19:08	5			1996-08-29	Male	178	78	24.6	Right	THIRD TEST 24h	Erector Spin	Lateral	Sitting	Left	Relaxed	19.1	521	0.85	10.6	0.69	15	Fabio Valenti	000560	2024	2	5	4	Day
7.33061e+18	2024-02-01 13:19:15	1			1996-08-29	Male	178	78	24.6	Right	THIRD TEST 24h	Erector Spin	Lateral	Sitting	Right	Relaxed	18.6	453	0.87	11.7	0.74	15	Fabio Valenti	000560	2024	2	5	4	Day
7.33061e+18	2024-02-01 13:19:16	2			1996-08-29	Male	178	78	24.6	Right	THIRD TEST 24h	Erector Spin	Lateral	Sitting	Right	Relaxed	18.7	464	0.89	11.6	0.74	15	Fabio Valenti	000560	2024	2	5	4	Day
7.33061e+18	2024-02-01 13:19:17	3			1996-08-29	Male	178	78	24.6	Right	THIRD TEST 24h	Erector Spin	Lateral	Sitting	Right	Relaxed	18.5	464	0.84	11.8	0.75	15	Fabio Valenti	000560	2024	2	5	4	Day
7.33061e+18	2024-02-01 13:19:18	4			1996-08-29	Male	178	78	24.6	Right	THIRD TEST 24h	Erector Spin	Lateral	Sitting	Right	Relaxed	18.5	470	0.84	11.5	0.73	15	Fabio Valenti	000560	2024	2	5	4	Day
7.33061e+18	2024-02-01 13:19:18	5			1996-08-29	Male	178	78	24.6	Right	THIRD TEST 24h	Erector Spin	Lateral	Sitting	Right	Relaxed	18.5	471	0.83	11.5	0.73	15	Fabio Valenti	000560	2024	2	5	4	Day
7.32464e+18	2024-01-16 11:12:49	1			1981-01-09	Male	185	80	23.4	Left	FIRST TEST	Erector Spin	Lateral	Lying	Left	Relaxed	14.8	326	1.36	17.7	1.11	15	Fabio Valenti	000560	2024	1	3	2	Morning
7.32464e+18	2024-01-16 11:12:50	2			1981-01-09	Male	185	80	23.4	Left	FIRST TEST	Erector Spin	Lateral	Lying	Left	Relaxed	14.8	325	1.36	17.9	1.12	15	Fabio Valenti	000560	2024	1	3	2	Morning
7.32464e+18	2024-01-16 11:12:51	3			1981-01-09	Male	185	80	23.4	Left	FIRST TEST	Erector Spin	Lateral	Lying	Left	Relaxed	14.8	323	1.35	18.3	1.16	15	Fabio Valenti	000560	2024	1	3	2	Morning
7.32464e+18	2024-01-16 11:12:51	4			1981-01-09	Male	185	80	23.4	Left	FIRST TEST	Erector Spin	Lateral	Lying	Left	Relaxed	14.9	326	1.36	18.1	1.13	15	Fabio Valenti	000560	2024	1	3	2	Morning
7.32464e+18	2024-01-16 11:12:52	5			1981-01-09	Male	185	80	23.4	Left	FIRST TEST	Erector Spin	Lateral	Lying	Left	Relaxed	15	328	1.35	17.7	1.11	15	Fabio Valenti	000560	2024	1	3	2	Morning
7.32464e+18	2024-01-16 11:13:02	1			1981-01-09	Male	185	80	23.4	Left	FIRST TEST	Erector Spin	Lateral	Lying	Right	Relaxed	17.1	371	1.31	15.2	0.95	15	Fabio Valenti	000560	2024	1	3	2	Morning
7.32464e+18	2024-01-16 11:13:03	2			1981-01-09	Male	185	80	23.4	Left	FIRST TEST	Erector Spin	Lateral	Lying	Right	Relaxed	17	379	1.28	15.2	0.96	15	Fabio Valenti	000560	2024	1	3	2	Morning
7.32464e+18	2024-01-16 11:13:04	3			1981-01-09	Male	185	80	23.4	Left	FIRST TEST	Erector Spin	Lateral	Lying	Right	Relaxed	17	386	1.27	14.9	0.94	15	Fabio Valenti	000560	2024	1	3	2	Morning
7.32464e+18	2024-01-16 11:13:04	4			1981-01-09	Male	185	80	23.4	Left	FIRST TEST	Erector Spin	Lateral	Lying	Right	Relaxed	17	389	1.27	14.8	0.94	15	Fabio Valenti	000560	2024	1	3	2	Morning
7.32464e+18	2024-01-16 11:13:05	5			1981-01-09	Male	185	80	23.4	Left	FIRST TEST	Erector Spin	Lateral	Lying	Right	Relaxed	16.9	387	1.26	15	0.95	15	Fabio Valenti	000560	2024	1	3	2	Morning
7.32464e+18	2024-01-16 11:13:26	1			1981-01-09	Male	185	80	23.4	Left	FIRST TEST	Erector Spin	Lateral	Sitting	Left	Relaxed	19.9	524	1.06	10.1	0.67	15	Fabio Valenti	000560	2024	1	3	2	Morning
7.32464e+18	2024-01-16 11:13:26	2			1981-01-09	Male	185	80	23.4	Left	FIRST TEST	Erector Spin	Lateral	Sitting	Left	Relaxed	19.8	530	1.03	10.1	0.67	15	Fabio Valenti	000560	2024	1	3	2	Morning
7.32464e+18	2024-01-16 11:13:27	3			1981-01-09	Male	185	80	23.4	Left	FIRST TEST	Erector Spin	Lateral	Sitting	Left	Relaxed	19.8	540	1.03	10.1	0.67	15	Fabio Valenti	000560	2024	1	3	2	Morning
7.32464e+18	2024-01-16 11:13:28	4			1981-01-09	Male	185	80	23.4	Left	FIRST TEST	Erector Spin	Lateral	Sitting	Left	Relaxed	19.9	544	1.04	9.9	0.66	15	Fabio Valenti	000560	2024	1	3	2	Morning
7.32464e+18	2024-01-16 11:13:28	5			1981-01-09	Male	185	80	23.4	Left	FIRST TEST	Erector Spin	Lateral	Sitting	Left	Relaxed	19.9	541	1.06	10.1	0.67	15	Fabio Valenti	000560	2024	1	3	2	Morning
7.32464e+18	2024-01-16 11:13:56	1			1981-01-09	Male	185	80	23.4	Left	FIRST TEST	Erector Spin	Lateral	Sitting	Right	Relaxed	21.6	614	1.09	8.9	0.6	15	Fabio Valenti	000560	2024	1	3	2	Morning
7.32464e+18	2024-01-16 11:13:57	2			1981-01-09	Male	185	80	23.4	Left	FIRST TEST	Erector Spin	Lateral	Sitting	Right	Relaxed	21.7	627	1.07	8.7	0.59	15	Fabio Valenti	000560	2024	1	3	2	Morning
7.32464e+18	2024-01-16 11:13:58	3			1981-01-09	Male	185	80	23.4	Left	FIRST TEST	Erector Spin	Lateral	Sitting	Right	Relaxed	21.6	622	1.08	8.9	0.6	15	Fabio Valenti	000560	2024	1	3	2	Morning
7.32464e+18	2024-01-16 11:13:58	4			1981-01-09	Male	185	80	23.4	Left	FIRST TEST	Erector Spin	Lateral	Sitting	Right	Relaxed	21.8	628	1.05	8.7	0.59	15	Fabio Valenti	000560	2024	1	3	2	Morning
7.32464e+18	2024-01-16 11:13:59	5			1981-01-09	Male	185	80	23.4	Left	FIRST TEST	Erector Spin	Lateral	Sitting	Right	Relaxed	21.7	630	1.05	8.7	0.59	15	Fabio Valenti	000560	2024	1	3	2	Morning
7.32464e+18	2024-01-16 11:40:59	1			1981-01-09	Male	185	80	23.4	Left	SECOND TESTING 30 min	Erector Spin	Lateral	Lying	Left	Relaxed	15	328	1.25	16.9	1.05	15	Fabio Valenti	000560	2024	1	3	2	Morning
7.32464e+18	2024-01-16 11:41:00	2			1981-01-09	Male	185	80	23.4	Left	SECOND TESTING 30 min	Erector Spin	Lateral	Lying	Left	Relaxed	15.1	338	1.23	16.8	1.05	15	Fabio Valenti	000560	2024	1	3	2	Morning
7.32464e+18	2024-01-16 11:41:00	3			1981-01-09	Male	185	80	23.4	Left	SECOND TESTING 30 min	Erector Spin	Lateral	Lying	Left	Relaxed	15.3	347	1.22	16.6	1.04	15	Fabio Valenti	000560	2024	1	3	2	Morning
7.32464e+18	2024-01-16 11:41:01	4			1981-01-09	Male	185	80	23.4	Left	SECOND TESTING 30 min	Erector Spin	Lateral	Lying	Left	Relaxed	15.3	351	1.22	16.5	1.03	15	Fabio Valenti	000560	2024	1	3	2	Morning
7.32464e+18	2024-01-16 11:41:02	5			1981-01-09	Male	185	80	23.4	Left	SECOND TESTING 30 min	Erector Spin	Lateral	Lying	Left	Relaxed	15.3	353	1.21	16.4	1.03	15	Fabio Valenti	000560	2024	1	3	2	Morning
7.32464e+18	2024-01-16 11:41:09	1			1981-01-09	Male	185	80	23.4	Left	SECOND TESTING 30 min	Erector Spin	Lateral	Lying	Right	Relaxed	17.4	369	1.33	15.4	0.96	15	Fabio Valenti	000560	2024	1	3	2	Morning
7.32464e+18	2024-01-16 11:41:10	2			1981-01-09	Male	185	80	23.4	Left	SECOND TESTING 30 min	Erector Spin	Lateral	Lying	Right	Relaxed	17.3	378	1.31	15.3	0.96	15	Fabio Valenti	000560	2024	1	3	2	Morning
7.32464e+18	2024-01-16 11:41:10	3			1981-01-09	Male	185	80	23.4	Left	SECOND TESTING 30 min	Erector Spin	Lateral	Lying	Right	Relaxed	17.4	385	1.27	15.1	0.95	15	Fabio Valenti	000560	2024	1	3	2	Morning
7.32464e+18	2024-01-16 11:41:11	4			1981-01-09	Male	185	80	23.4	Left	SECOND TESTING 30 min	Erector Spin	Lateral	Lying	Right	Relaxed	17.5	385	1.25	15.1	0.95	15	Fabio Valenti	000560	2024	1	3	2	Morning
7.32464e+18	2024-01-16 11:41:12	5			1981-01-09	Male	185	80	23.4	Left	SECOND TESTING 30 min	Erector Spin	Lateral	Lying	Right	Relaxed	17.5	387	1.25	15.1	0.96	15	Fabio Valenti	000560	2024	1	3	2	Morning
7.32464e+18	2024-01-16 11:41:35	1			1981-01-09	Male	185	80	23.4	Left	SECOND TESTING 30 min	Erector Spin	Lateral	Sitting	Left	Relaxed	20.2	532	1.08	10	0.65	15	Fabio Valenti	000560	2024	1	3	2	Morning
7.32464e+18	2024-01-16 11:41:35	2			1981-01-09	Male	185	80	23.4	Left	SECOND TESTING 30 min	Erector Spin	Lateral	Sitting	Left	Relaxed	20.4	549	1.06	9.8	0.65	15	Fabio Valenti	000560	2024	1	3	2	Morning
7.32464e+18	2024-01-16 11:41:36	3			1981-01-09	Male	185	80	23.4	Left	SECOND TESTING 30 min	Erector Spin	Lateral	Sitting	Left	Relaxed	20.4	549	1.07	9.8	0.65	15	Fabio Valenti	000560	2024	1	3	2	Morning
7.32464e+18	2024-01-16 11:41:37	4			1981-01-09	Male	185	80	23.4	Left	SECOND TESTING 30 min	Erector Spin	Lateral	Sitting	Left	Relaxed	20.3	551	1.05	9.8	0.65	15	Fabio Valenti	000560	2024	1	3	2	Morning
7.32464e+18	2024-01-16 11:41:38	5			1981-01-09	Male	185	80	23.4	Left	SECOND TESTING 30 min	Erector Spin	Lateral	Sitting	Left	Relaxed	20.2	555	1.06	9.8	0.65	15	Fabio Valenti	000560	2024	1	3	2	Morning
7.32464e+18	2024-01-16 11:41:47	1			1981-01-09	Male	185	80	23.4	Left	SECOND TESTING 30 min	Erector Spin	Lateral	Sitting	Right	Relaxed	22.3	614	1.07	8.7	0.58	15	Fabio Valenti	000560	2024	1	3	2	Morning
7.32464e+18	2024-01-16 11:41:48	2			1981-01-09	Male	185	80	23.4	Left	SECOND TESTING 30 min	Erector Spin	Lateral	Sitting	Right	Relaxed	22.1	627	1.04	8.8	0.59	15	Fabio Valenti	000560	2024	1	3	2	Morning
7.32464e+18	2024-01-16 11:41:49	3			1981-01-09	Male	185	80	23.4	Left	SECOND TESTING 30 min	Erector Spin	Lateral	Sitting	Right	Relaxed	21.9	621	1.03	8.9	0.6	15	Fabio Valenti	000560	2024	1	3	2	Morning
7.32464e+18	2024-01-16 11:41:49	4			1981-01-09	Male	185	80	23.4	Left	SECOND TESTING 30 min	Erector Spin	Lateral	Sitting	Right	Relaxed	22	622	1.02	8.9	0.6	15	Fabio Valenti	000560	2024	1	3	2	Morning
7.32464e+18	2024-01-16 11:41:50	5			1981-01-09	Male	185	80	23.4	Left	SECOND TESTING 30 min	Erector Spin	Lateral	Sitting	Right	Relaxed	22.1	627	1.03	8.8	0.59	15	Fabio Valenti	000560	2024	1	3	2	Morning
7.32501e+18	2024-01-17 11:16:51	1			1981-01-09	Male	185	80	23.4	Left	THIRD TEST 24h	Erector Spin	Lateral	Lying	Left	Relaxed	15	318	1.48	17.7	1.09	15	Fabio Valenti	000560	2024	1	3	3	Morning
7.32501e+18	2024-01-17 11:16:52	2			1981-01-09	Male	185	80	23.4	Left	THIRD TEST 24h	Erector Spin	Lateral	Lying	Left	Relaxed	14.9	325	1.46	17.5	1.08	15	Fabio Valenti	000560	2024	1	3	3	Morning
7.32501e+18	2024-01-17 11:16:52	3			1981-01-09	Male	185	80	23.4	Left	THIRD TEST 24h	Erector Spin	Lateral	Lying	Left	Relaxed	14.9	329	1.45	17.5	1.09	15	Fabio Valenti	000560	2024	1	3	3	Morning
7.32501e+18	2024-01-17 11:16:53	4			1981-01-09	Male	185	80	23.4	Left	THIRD TEST 24h	Erector Spin	Lateral	Lying	Left	Relaxed	14.9	329	1.45	17.4	1.08	15	Fabio Valenti	000560	2024	1	3	3	Morning
7.32501e+18	2024-01-17 11:16:54	5			1981-01-09	Male	185	80	23.4	Left	THIRD TEST 24h	Erector Spin	Lateral	Lying	Left	Relaxed	15	330	1.45	17.3	1.08	15	Fabio Valenti	000560	2024	1	3	3	Morning
7.32501e+18	2024-01-17 11:17:02	1			1981-01-09	Male	185	80	23.4	Left	THIRD TEST 24h	Erector Spin	Lateral	Lying	Right	Relaxed	16.5	339	1.35	16.4	1.01	15	Fabio Valenti	000560	2024	1	3	3	Morning
7.32501e+18	2024-01-17 11:17:03	2			1981-01-09	Male	185	80	23.4	Left	THIRD TEST 24h	Erector Spin	Lateral	Lying	Right	Relaxed	16.6	347	1.32	16.1	0.99	15	Fabio Valenti	000560	2024	1	3	3	Morning
7.32501e+18	2024-01-17 11:17:04	3			1981-01-09	Male	185	80	23.4	Left	THIRD TEST 24h	Erector Spin	Lateral	Lying	Right	Relaxed	16.6	350	1.31	15.9	0.98	15	Fabio Valenti	000560	2024	1	3	3	Morning
7.32501e+18	2024-01-17 11:17:04	4			1981-01-09	Male	185	80	23.4	Left	THIRD TEST 24h	Erector Spin	Lateral	Lying	Right	Relaxed	16.8	354	1.31	15.9	0.99	15	Fabio Valenti	000560	2024	1	3	3	Morning
7.32501e+18	2024-01-17 11:17:05	5			1981-01-09	Male	185	80	23.4	Left	THIRD TEST 24h	Erector Spin	Lateral	Lying	Right	Relaxed	16.7	356	1.33	15.9	0.99	15	Fabio Valenti	000560	2024	1	3	3	Morning
7.32501e+18	2024-01-17 11:17:35	1			1981-01-09	Male	185	80	23.4	Left	THIRD TEST 24h	Erector Spin	Lateral	Sitting	Left	Relaxed	21.1	548	1.06	9.8	0.64	15	Fabio Valenti	000560	2024	1	3	3	Morning
7.32501e+18	2024-01-17 11:17:36	2			1981-01-09	Male	185	80	23.4	Left	THIRD TEST 24h	Erector Spin	Lateral	Sitting	Left	Relaxed	21.3	553	1.01	9.7	0.64	15	Fabio Valenti	000560	2024	1	3	3	Morning
7.32501e+18	2024-01-17 11:17:37	3			1981-01-09	Male	185	80	23.4	Left	THIRD TEST 24h	Erector Spin	Lateral	Sitting	Left	Relaxed	21.1	552	1.02	9.8	0.65	15	Fabio Valenti	000560	2024	1	3	3	Morning
7.32501e+18	2024-01-17 11:17:37	4			1981-01-09	Male	185	80	23.4	Left	THIRD TEST 24h	Erector Spin	Lateral	Sitting	Left	Relaxed	21.1	552	1.01	9.8	0.65	15	Fabio Valenti	000560	2024	1	3	3	Morning
7.32501e+18	2024-01-17 11:17:38	5			1981-01-09	Male	185	80	23.4	Left	THIRD TEST 24h	Erector Spin	Lateral	Sitting	Left	Relaxed	21.1	553	1.03	9.8	0.65	15	Fabio Valenti	000560	2024	1	3	3	Morning
7.32501e+18	2024-01-17 11:17:46	1			1981-01-09	Male	185	80	23.4	Left	THIRD TEST 24h	Erector Spin	Lateral	Sitting	Right	Relaxed	23.6	622	1.07	8.7	0.58	15	Fabio Valenti	000560	2024	1	3	3	Morning
7.32501e+18	2024-01-17 11:17:47	2			1981-01-09	Male	185	80	23.4	Left	THIRD TEST 24h	Erector Spin	Lateral	Sitting	Right	Relaxed	23.3	634	1.04	8.5	0.57	15	Fabio Valenti	000560	2024	1	3	3	Morning
7.32501e+18	2024-01-17 11:17:47	3			1981-01-09	Male	185	80	23.4	Left	THIRD TEST 24h	Erector Spin	Lateral	Sitting	Right	Relaxed	23.2	634	1.03	8.6	0.58	15	Fabio Valenti	000560	2024	1	3	3	Morning
7.32501e+18	2024-01-17 11:17:48	4			1981-01-09	Male	185	80	23.4	Left	THIRD TEST 24h	Erector Spin	Lateral	Sitting	Right	Relaxed	23.3	635	1.03	8.6	0.58	15	Fabio Valenti	000560	2024	1	3	3	Morning
7.32501e+18	2024-01-17 11:17:49	5			1981-01-09	Male	185	80	23.4	Left	THIRD TEST 24h	Erector Spin	Lateral	Sitting	Right	Relaxed	23.3	637	1.01	8.5	0.57	15	Fabio Valenti	000560	2024	1	3	3	Morning
7.32277e+18	2024-01-11 10:22:27	1			1995-08-29	Female	170	65	22.5	Right	FIRST TEST	Erector Spin	Lateral	Lying	Left	Relaxed	11.8	176	0.87	27.9	1.63	15	Fabio Valenti	000560	2024	1	2	4	Morning
7.32277e+18	2024-01-11 10:22:28	2			1995-08-29	Female	170	65	22.5	Right	FIRST TEST	Erector Spin	Lateral	Lying	Left	Relaxed	11.8	176	0.84	28.1	1.64	15	Fabio Valenti	000560	2024	1	2	4	Morning
7.32277e+18	2024-01-11 10:22:29	3			1995-08-29	Female	170	65	22.5	Right	FIRST TEST	Erector Spin	Lateral	Lying	Left	Relaxed	11.8	176	0.84	28	1.64	15	Fabio Valenti	000560	2024	1	2	4	Morning
7.32277e+18	2024-01-11 10:22:30	4			1995-08-29	Female	170	65	22.5	Right	FIRST TEST	Erector Spin	Lateral	Lying	Left	Relaxed	11.8	177	0.85	27.9	1.63	15	Fabio Valenti	000560	2024	1	2	4	Morning
7.32277e+18	2024-01-11 10:22:30	5			1995-08-29	Female	170	65	22.5	Right	FIRST TEST	Erector Spin	Lateral	Lying	Left	Relaxed	11.9	182	0.85	27.8	1.64	15	Fabio Valenti	000560	2024	1	2	4	Morning
7.32277e+18	2024-01-11 10:22:45	1			1995-08-29	Female	170	65	22.5	Right	FIRST TEST	Erector Spin	Lateral	Lying	Right	Relaxed	12.3	189	0.99	26.4	1.54	15	Fabio Valenti	000560	2024	1	2	4	Morning
7.32277e+18	2024-01-11 10:22:46	2			1995-08-29	Female	170	65	22.5	Right	FIRST TEST	Erector Spin	Lateral	Lying	Right	Relaxed	12.3	189	0.96	26.2	1.52	15	Fabio Valenti	000560	2024	1	2	4	Morning
7.32277e+18	2024-01-11 10:22:46	3			1995-08-29	Female	170	65	22.5	Right	FIRST TEST	Erector Spin	Lateral	Lying	Right	Relaxed	12.3	190	0.96	26.5	1.56	15	Fabio Valenti	000560	2024	1	2	4	Morning
7.32277e+18	2024-01-11 10:22:47	4			1995-08-29	Female	170	65	22.5	Right	FIRST TEST	Erector Spin	Lateral	Lying	Right	Relaxed	12.3	190	0.95	26.3	1.55	15	Fabio Valenti	000560	2024	1	2	4	Morning
7.32277e+18	2024-01-11 10:22:49	5			1995-08-29	Female	170	65	22.5	Right	FIRST TEST	Erector Spin	Lateral	Lying	Right	Relaxed	12.3	196	0.98	26.3	1.56	15	Fabio Valenti	000560	2024	1	2	4	Morning
7.32277e+18	2024-01-11 10:23:17	1			1995-08-29	Female	170	65	22.5	Right	FIRST TEST	Erector Spin	Lateral	Sitting	Left	Relaxed	12.3	183	0.85	21.5	1.13	15	Fabio Valenti	000560	2024	1	2	4	Morning
7.32277e+18	2024-01-11 10:23:17	2			1995-08-29	Female	170	65	22.5	Right	FIRST TEST	Erector Spin	Lateral	Sitting	Left	Relaxed	12.1	180	0.82	21.2	1.09	15	Fabio Valenti	000560	2024	1	2	4	Morning
7.32277e+18	2024-01-11 10:23:18	3			1995-08-29	Female	170	65	22.5	Right	FIRST TEST	Erector Spin	Lateral	Sitting	Left	Relaxed	12	176	0.83	21.3	1.09	15	Fabio Valenti	000560	2024	1	2	4	Morning
7.32277e+18	2024-01-11 10:23:19	4			1995-08-29	Female	170	65	22.5	Right	FIRST TEST	Erector Spin	Lateral	Sitting	Left	Relaxed	12	174	0.82	21.4	1.09	15	Fabio Valenti	000560	2024	1	2	4	Morning
7.32277e+18	2024-01-11 10:23:19	5			1995-08-29	Female	170	65	22.5	Right	FIRST TEST	Erector Spin	Lateral	Sitting	Left	Relaxed	11.9	176	0.83	21.2	1.08	15	Fabio Valenti	000560	2024	1	2	4	Morning
7.32277e+18	2024-01-11 10:23:31	1			1995-08-29	Female	170	65	22.5	Right	FIRST TEST	Erector Spin	Lateral	Sitting	Right	Relaxed	12.9	235	0.97	19.8	1.11	15	Fabio Valenti	000560	2024	1	2	4	Morning
7.32277e+18	2024-01-11 10:23:32	2			1995-08-29	Female	170	65	22.5	Right	FIRST TEST	Erector Spin	Lateral	Sitting	Right	Relaxed	12.8	232	0.93	19.9	1.1	15	Fabio Valenti	000560	2024	1	2	4	Morning
7.32277e+18	2024-01-11 10:23:33	3			1995-08-29	Female	170	65	22.5	Right	FIRST TEST	Erector Spin	Lateral	Sitting	Right	Relaxed	12.8	242	0.95	19.6	1.11	15	Fabio Valenti	000560	2024	1	2	4	Morning
7.32277e+18	2024-01-11 10:23:33	4			1995-08-29	Female	170	65	22.5	Right	FIRST TEST	Erector Spin	Lateral	Sitting	Right	Relaxed	12.8	236	0.93	19.6	1.11	15	Fabio Valenti	000560	2024	1	2	4	Morning
7.32277e+18	2024-01-11 10:23:34	5			1995-08-29	Female	170	65	22.5	Right	FIRST TEST	Erector Spin	Lateral	Sitting	Right	Relaxed	12.7	235	0.95	19.8	1.1	15	Fabio Valenti	000560	2024	1	2	4	Morning
7.32278e+18	2024-01-11 11:07:47	1			1995-08-29	Female	170	65	22.5	Right	SECOND TESTING 30 min	Erector Spin	Lateral	Lying	Left	Relaxed	12.5	176	0.81	26.9	1.53	15	Fabio Valenti	000560	2024	1	2	4	Morning
7.32278e+18	2024-01-11 11:07:47	2			1995-08-29	Female	170	65	22.5	Right	SECOND TESTING 30 min	Erector Spin	Lateral	Lying	Left	Relaxed	12.5	176	0.79	26.6	1.51	15	Fabio Valenti	000560	2024	1	2	4	Morning
7.32278e+18	2024-01-11 11:07:48	3			1995-08-29	Female	170	65	22.5	Right	SECOND TESTING 30 min	Erector Spin	Lateral	Lying	Left	Relaxed	12.5	179	0.77	26.8	1.55	15	Fabio Valenti	000560	2024	1	2	4	Morning
7.32278e+18	2024-01-11 11:07:49	4			1995-08-29	Female	170	65	22.5	Right	SECOND TESTING 30 min	Erector Spin	Lateral	Lying	Left	Relaxed	12.5	175	0.77	26.6	1.52	15	Fabio Valenti	000560	2024	1	2	4	Morning
7.32278e+18	2024-01-11 11:07:49	5			1995-08-29	Female	170	65	22.5	Right	SECOND TESTING 30 min	Erector Spin	Lateral	Lying	Left	Relaxed	12.5	180	0.77	26.7	1.54	15	Fabio Valenti	000560	2024	1	2	4	Morning
7.32278e+18	2024-01-11 11:08:05	1			1995-08-29	Female	170	65	22.5	Right	SECOND TESTING 30 min	Erector Spin	Lateral	Lying	Right	Relaxed	13.1	203	0.96	24.7	1.45	15	Fabio Valenti	000560	2024	1	2	4	Morning
7.32278e+18	2024-01-11 11:08:06	2			1995-08-29	Female	170	65	22.5	Right	SECOND TESTING 30 min	Erector Spin	Lateral	Lying	Right	Relaxed	13.1	204	0.94	24.5	1.44	15	Fabio Valenti	000560	2024	1	2	4	Morning
7.32278e+18	2024-01-11 11:08:06	3			1995-08-29	Female	170	65	22.5	Right	SECOND TESTING 30 min	Erector Spin	Lateral	Lying	Right	Relaxed	13.1	204	0.92	24.5	1.44	15	Fabio Valenti	000560	2024	1	2	4	Morning
7.32278e+18	2024-01-11 11:08:07	4			1995-08-29	Female	170	65	22.5	Right	SECOND TESTING 30 min	Erector Spin	Lateral	Lying	Right	Relaxed	13.1	201	0.92	24.2	1.41	15	Fabio Valenti	000560	2024	1	2	4	Morning
7.32278e+18	2024-01-11 11:08:08	5			1995-08-29	Female	170	65	22.5	Right	SECOND TESTING 30 min	Erector Spin	Lateral	Lying	Right	Relaxed	13.1	205	0.92	24.2	1.42	15	Fabio Valenti	000560	2024	1	2	4	Morning
7.32278e+18	2024-01-11 11:08:28	1			1995-08-29	Female	170	65	22.5	Right	SECOND TESTING 30 min	Erector Spin	Lateral	Sitting	Left	Relaxed	12.5	185	0.73	22.1	1.17	15	Fabio Valenti	000560	2024	1	2	4	Morning
7.32278e+18	2024-01-11 11:08:29	2			1995-08-29	Female	170	65	22.5	Right	SECOND TESTING 30 min	Erector Spin	Lateral	Sitting	Left	Relaxed	12.2	173	0.78	22.1	1.14	15	Fabio Valenti	000560	2024	1	2	4	Morning
7.32278e+18	2024-01-11 11:08:29	3			1995-08-29	Female	170	65	22.5	Right	SECOND TESTING 30 min	Erector Spin	Lateral	Sitting	Left	Relaxed	12.1	174	0.76	22.1	1.14	15	Fabio Valenti	000560	2024	1	2	4	Morning
7.32278e+18	2024-01-11 11:08:30	4			1995-08-29	Female	170	65	22.5	Right	SECOND TESTING 30 min	Erector Spin	Lateral	Sitting	Left	Relaxed	12	175	0.75	22.7	1.19	15	Fabio Valenti	000560	2024	1	2	4	Morning
7.32278e+18	2024-01-11 11:08:31	5			1995-08-29	Female	170	65	22.5	Right	SECOND TESTING 30 min	Erector Spin	Lateral	Sitting	Left	Relaxed	11.9	173	0.76	22.3	1.14	15	Fabio Valenti	000560	2024	1	2	4	Morning
7.32278e+18	2024-01-11 11:08:46	1			1995-08-29	Female	170	65	22.5	Right	SECOND TESTING 30 min	Erector Spin	Lateral	Sitting	Right	Relaxed	14	270	0.99	18	1.04	15	Fabio Valenti	000560	2024	1	2	4	Morning
7.32278e+18	2024-01-11 11:08:46	2			1995-08-29	Female	170	65	22.5	Right	SECOND TESTING 30 min	Erector Spin	Lateral	Sitting	Right	Relaxed	13.8	275	0.98	17.7	1.02	15	Fabio Valenti	000560	2024	1	2	4	Morning
7.32278e+18	2024-01-11 11:08:49	3			1995-08-29	Female	170	65	22.5	Right	SECOND TESTING 30 min	Erector Spin	Lateral	Sitting	Right	Relaxed	13.9	283	0.95	17.5	1.02	15	Fabio Valenti	000560	2024	1	2	4	Morning
7.32278e+18	2024-01-11 11:08:49	4			1995-08-29	Female	170	65	22.5	Right	SECOND TESTING 30 min	Erector Spin	Lateral	Sitting	Right	Relaxed	13.9	283	0.95	17.4	1.01	15	Fabio Valenti	000560	2024	1	2	4	Morning
7.32278e+18	2024-01-11 11:08:50	5			1995-08-29	Female	170	65	22.5	Right	SECOND TESTING 30 min	Erector Spin	Lateral	Sitting	Right	Relaxed	13.8	281	0.95	17.4	1.01	15	Fabio Valenti	000560	2024	1	2	4	Morning
7.32314e+18	2024-01-12 10:21:50	1			1995-08-29	Female	170	65	22.5	Right	THIRD TEST 24h	Erector Spin	Lateral	Lying	Left	Relaxed	12.8	205	1.05	25.6	1.5	15	Fabio Valenti	000560	2024	1	2	5	Morning
7.32314e+18	2024-01-12 10:21:50	2			1995-08-29	Female	170	65	22.5	Right	THIRD TEST 24h	Erector Spin	Lateral	Lying	Left	Relaxed	12.8	206	1.04	25.5	1.5	15	Fabio Valenti	000560	2024	1	2	5	Morning
7.32314e+18	2024-01-12 10:21:51	3			1995-08-29	Female	170	65	22.5	Right	THIRD TEST 24h	Erector Spin	Lateral	Lying	Left	Relaxed	12.9	209	1.03	25.3	1.48	15	Fabio Valenti	000560	2024	1	2	5	Morning
7.32314e+18	2024-01-12 10:21:52	4			1995-08-29	Female	170	65	22.5	Right	THIRD TEST 24h	Erector Spin	Lateral	Lying	Left	Relaxed	12.9	216	1.04	25.1	1.48	15	Fabio Valenti	000560	2024	1	2	5	Morning
7.32314e+18	2024-01-12 10:21:52	5			1995-08-29	Female	170	65	22.5	Right	THIRD TEST 24h	Erector Spin	Lateral	Lying	Left	Relaxed	12.9	217	1.02	25.1	1.49	15	Fabio Valenti	000560	2024	1	2	5	Morning
7.32314e+18	2024-01-12 10:22:01	1			1995-08-29	Female	170	65	22.5	Right	THIRD TEST 24h	Erector Spin	Lateral	Lying	Right	Relaxed	12.8	207	1.16	25	1.47	15	Fabio Valenti	000560	2024	1	2	5	Morning
7.32314e+18	2024-01-12 10:22:02	2			1995-08-29	Female	170	65	22.5	Right	THIRD TEST 24h	Erector Spin	Lateral	Lying	Right	Relaxed	12.7	210	1.09	25.4	1.5	15	Fabio Valenti	000560	2024	1	2	5	Morning
7.32314e+18	2024-01-12 10:22:02	3			1995-08-29	Female	170	65	22.5	Right	THIRD TEST 24h	Erector Spin	Lateral	Lying	Right	Relaxed	12.8	210	1.1	25.3	1.49	15	Fabio Valenti	000560	2024	1	2	5	Morning
7.32314e+18	2024-01-12 10:22:03	4			1995-08-29	Female	170	65	22.5	Right	THIRD TEST 24h	Erector Spin	Lateral	Lying	Right	Relaxed	12.7	209	1.08	25.4	1.5	15	Fabio Valenti	000560	2024	1	2	5	Morning
7.32314e+18	2024-01-12 10:22:04	5			1995-08-29	Female	170	65	22.5	Right	THIRD TEST 24h	Erector Spin	Lateral	Lying	Right	Relaxed	12.7	206	1.1	25.3	1.48	15	Fabio Valenti	000560	2024	1	2	5	Morning
7.32314e+18	2024-01-12 10:22:24	1			1995-08-29	Female	170	65	22.5	Right	THIRD TEST 24h	Erector Spin	Lateral	Sitting	Left	Relaxed	12	182	0.86	21.7	1.12	15	Fabio Valenti	000560	2024	1	2	5	Morning
7.32314e+18	2024-01-12 10:22:25	2			1995-08-29	Female	170	65	22.5	Right	THIRD TEST 24h	Erector Spin	Lateral	Sitting	Left	Relaxed	11.9	182	0.86	21.6	1.12	15	Fabio Valenti	000560	2024	1	2	5	Morning
7.32314e+18	2024-01-12 10:22:26	3			1995-08-29	Female	170	65	22.5	Right	THIRD TEST 24h	Erector Spin	Lateral	Sitting	Left	Relaxed	11.8	180	0.88	21.9	1.14	15	Fabio Valenti	000560	2024	1	2	5	Morning
7.32314e+18	2024-01-12 10:22:26	4			1995-08-29	Female	170	65	22.5	Right	THIRD TEST 24h	Erector Spin	Lateral	Sitting	Left	Relaxed	11.7	175	0.88	21.7	1.11	15	Fabio Valenti	000560	2024	1	2	5	Morning
7.32314e+18	2024-01-12 10:22:27	5			1995-08-29	Female	170	65	22.5	Right	THIRD TEST 24h	Erector Spin	Lateral	Sitting	Left	Relaxed	11.6	175	0.88	21.9	1.12	15	Fabio Valenti	000560	2024	1	2	5	Morning
7.32314e+18	2024-01-12 10:22:36	1			1995-08-29	Female	170	65	22.5	Right	THIRD TEST 24h	Erector Spin	Lateral	Sitting	Right	Relaxed	12.1	180	0.78	21.7	1.12	15	Fabio Valenti	000560	2024	1	2	5	Morning
7.32314e+18	2024-01-12 10:22:37	2			1995-08-29	Female	170	65	22.5	Right	THIRD TEST 24h	Erector Spin	Lateral	Sitting	Right	Relaxed	11.9	175	0.77	21.9	1.12	15	Fabio Valenti	000560	2024	1	2	5	Morning
7.32314e+18	2024-01-12 10:22:37	3			1995-08-29	Female	170	65	22.5	Right	THIRD TEST 24h	Erector Spin	Lateral	Sitting	Right	Relaxed	11.8	171	0.76	22	1.11	15	Fabio Valenti	000560	2024	1	2	5	Morning
7.32314e+18	2024-01-12 10:22:38	4			1995-08-29	Female	170	65	22.5	Right	THIRD TEST 24h	Erector Spin	Lateral	Sitting	Right	Relaxed	11.7	174	0.75	22	1.12	15	Fabio Valenti	000560	2024	1	2	5	Morning
7.32314e+18	2024-01-12 10:22:39	5			1995-08-29	Female	170	65	22.5	Right	THIRD TEST 24h	Erector Spin	Lateral	Sitting	Right	Relaxed	11.7	171	0.73	22	1.11	15	Fabio Valenti	000560	2024	1	2	5	Morning
7.33024e+18	2024-01-31 13:32:05	1			1991-08-10	Male	183	80	23.9	Right	FIRST TEST	Erector Spin	Lateral	Lying	Left	Relaxed	16.7	367	1.13	13.8	0.85	15	Fabio Valenti	000560	2024	1	5	3	Day
7.33024e+18	2024-01-31 13:32:06	2			1991-08-10	Male	183	80	23.9	Right	FIRST TEST	Erector Spin	Lateral	Lying	Left	Relaxed	16.5	368	1.14	14	0.86	15	Fabio Valenti	000560	2024	1	5	3	Day
7.33024e+18	2024-01-31 13:32:06	3			1991-08-10	Male	183	80	23.9	Right	FIRST TEST	Erector Spin	Lateral	Lying	Left	Relaxed	16.6	371	1.13	13.9	0.86	15	Fabio Valenti	000560	2024	1	5	3	Day
7.33024e+18	2024-01-31 13:32:07	4			1991-08-10	Male	183	80	23.9	Right	FIRST TEST	Erector Spin	Lateral	Lying	Left	Relaxed	16.6	372	1.12	13.9	0.86	15	Fabio Valenti	000560	2024	1	5	3	Day
7.33024e+18	2024-01-31 13:32:08	5			1991-08-10	Male	183	80	23.9	Right	FIRST TEST	Erector Spin	Lateral	Lying	Left	Relaxed	16.6	372	1.12	13.9	0.86	15	Fabio Valenti	000560	2024	1	5	3	Day
7.33024e+18	2024-01-31 13:32:15	1			1991-08-10	Male	183	80	23.9	Right	FIRST TEST	Erector Spin	Lateral	Lying	Right	Relaxed	17.6	423	1.27	12.8	0.8	15	Fabio Valenti	000560	2024	1	5	3	Day
7.33024e+18	2024-01-31 13:32:15	2			1991-08-10	Male	183	80	23.9	Right	FIRST TEST	Erector Spin	Lateral	Lying	Right	Relaxed	17.4	425	1.26	12.9	0.82	15	Fabio Valenti	000560	2024	1	5	3	Day
7.33024e+18	2024-01-31 13:32:16	3			1991-08-10	Male	183	80	23.9	Right	FIRST TEST	Erector Spin	Lateral	Lying	Right	Relaxed	17.4	428	1.26	12.8	0.81	15	Fabio Valenti	000560	2024	1	5	3	Day
7.33024e+18	2024-01-31 13:32:17	4			1991-08-10	Male	183	80	23.9	Right	FIRST TEST	Erector Spin	Lateral	Lying	Right	Relaxed	17.3	426	1.26	12.9	0.81	15	Fabio Valenti	000560	2024	1	5	3	Day
7.33024e+18	2024-01-31 13:32:18	5			1991-08-10	Male	183	80	23.9	Right	FIRST TEST	Erector Spin	Lateral	Lying	Right	Relaxed	17.3	422	1.26	13	0.82	15	Fabio Valenti	000560	2024	1	5	3	Day
7.33024e+18	2024-01-31 13:32:51	1			1991-08-10	Male	183	80	23.9	Right	FIRST TEST	Erector Spin	Lateral	Sitting	Left	Relaxed	19.9	524	0.97	10.1	0.65	15	Fabio Valenti	000560	2024	1	5	3	Day
7.33024e+18	2024-01-31 13:32:52	2			1991-08-10	Male	183	80	23.9	Right	FIRST TEST	Erector Spin	Lateral	Sitting	Left	Relaxed	19.9	526	0.98	10.1	0.65	15	Fabio Valenti	000560	2024	1	5	3	Day
7.33024e+18	2024-01-31 13:32:52	3			1991-08-10	Male	183	80	23.9	Right	FIRST TEST	Erector Spin	Lateral	Sitting	Left	Relaxed	19.8	528	1.01	10.1	0.65	15	Fabio Valenti	000560	2024	1	5	3	Day
7.33024e+18	2024-01-31 13:32:54	4			1991-08-10	Male	183	80	23.9	Right	FIRST TEST	Erector Spin	Lateral	Sitting	Left	Relaxed	19.9	526	1.01	10.2	0.66	15	Fabio Valenti	000560	2024	1	5	3	Day
7.33024e+18	2024-01-31 13:32:55	5			1991-08-10	Male	183	80	23.9	Right	FIRST TEST	Erector Spin	Lateral	Sitting	Left	Relaxed	19.9	529	1.02	10.1	0.65	15	Fabio Valenti	000560	2024	1	5	3	Day
7.33024e+18	2024-01-31 13:33:24	1			1991-08-10	Male	183	80	23.9	Right	FIRST TEST	Erector Spin	Lateral	Sitting	Right	Relaxed	19.2	509	1.06	10.4	0.67	15	Fabio Valenti	000560	2024	1	5	3	Day
7.33024e+18	2024-01-31 13:33:24	2			1991-08-10	Male	183	80	23.9	Right	FIRST TEST	Erector Spin	Lateral	Sitting	Right	Relaxed	19.3	517	1.04	10.4	0.67	15	Fabio Valenti	000560	2024	1	5	3	Day
7.33024e+18	2024-01-31 13:33:25	3			1991-08-10	Male	183	80	23.9	Right	FIRST TEST	Erector Spin	Lateral	Sitting	Right	Relaxed	19.3	523	1.01	10.4	0.67	15	Fabio Valenti	000560	2024	1	5	3	Day
7.33024e+18	2024-01-31 13:33:26	4			1991-08-10	Male	183	80	23.9	Right	FIRST TEST	Erector Spin	Lateral	Sitting	Right	Relaxed	19.4	523	1.01	10.3	0.66	15	Fabio Valenti	000560	2024	1	5	3	Day
7.33024e+18	2024-01-31 13:33:27	5			1991-08-10	Male	183	80	23.9	Right	FIRST TEST	Erector Spin	Lateral	Sitting	Right	Relaxed	19.4	528	1.01	10.2	0.66	15	Fabio Valenti	000560	2024	1	5	3	Day
7.33025e+18	2024-01-31 14:06:08	1			1991-08-10	Male	183	80	23.9	Right	SECOND TESTING 30 min	Erector Spin	Lateral	Lying	Left	Relaxed	14.7	291	1.31	17.8	1.08	15	Fabio Valenti	000560	2024	1	5	3	Day
7.33025e+18	2024-01-31 14:06:08	2			1991-08-10	Male	183	80	23.9	Right	SECOND TESTING 30 min	Erector Spin	Lateral	Lying	Left	Relaxed	14.5	288	1.27	18.1	1.1	15	Fabio Valenti	000560	2024	1	5	3	Day
7.33025e+18	2024-01-31 14:06:09	3			1991-08-10	Male	183	80	23.9	Right	SECOND TESTING 30 min	Erector Spin	Lateral	Lying	Left	Relaxed	14.5	286	1.27	18.1	1.1	15	Fabio Valenti	000560	2024	1	5	3	Day
7.33025e+18	2024-01-31 14:06:10	4			1991-08-10	Male	183	80	23.9	Right	SECOND TESTING 30 min	Erector Spin	Lateral	Lying	Left	Relaxed	14.4	286	1.26	18.2	1.11	15	Fabio Valenti	000560	2024	1	5	3	Day
7.33025e+18	2024-01-31 14:06:10	5			1991-08-10	Male	183	80	23.9	Right	SECOND TESTING 30 min	Erector Spin	Lateral	Lying	Left	Relaxed	14.5	290	1.25	18	1.1	15	Fabio Valenti	000560	2024	1	5	3	Day
7.33025e+18	2024-01-31 14:06:27	1			1991-08-10	Male	183	80	23.9	Right	SECOND TESTING 30 min	Erector Spin	Lateral	Lying	Right	Relaxed	14.8	318	1.46	16.8	1.03	15	Fabio Valenti	000560	2024	1	5	3	Day
7.33025e+18	2024-01-31 14:06:27	2			1991-08-10	Male	183	80	23.9	Right	SECOND TESTING 30 min	Erector Spin	Lateral	Lying	Right	Relaxed	14.8	325	1.43	16.6	1.03	15	Fabio Valenti	000560	2024	1	5	3	Day
7.33025e+18	2024-01-31 14:06:28	3			1991-08-10	Male	183	80	23.9	Right	SECOND TESTING 30 min	Erector Spin	Lateral	Lying	Right	Relaxed	14.8	325	1.42	16.6	1.03	15	Fabio Valenti	000560	2024	1	5	3	Day
7.33025e+18	2024-01-31 14:06:29	4			1991-08-10	Male	183	80	23.9	Right	SECOND TESTING 30 min	Erector Spin	Lateral	Lying	Right	Relaxed	14.8	325	1.42	16.6	1.03	15	Fabio Valenti	000560	2024	1	5	3	Day
7.33025e+18	2024-01-31 14:06:30	5			1991-08-10	Male	183	80	23.9	Right	SECOND TESTING 30 min	Erector Spin	Lateral	Lying	Right	Relaxed	14.9	330	1.38	16.4	1.02	15	Fabio Valenti	000560	2024	1	5	3	Day
7.33025e+18	2024-01-31 14:06:46	1			1991-08-10	Male	183	80	23.9	Right	SECOND TESTING 30 min	Erector Spin	Lateral	Sitting	Left	Relaxed	21.6	594	0.96	8.8	0.57	15	Fabio Valenti	000560	2024	1	5	3	Day
7.33025e+18	2024-01-31 14:06:49	2			1991-08-10	Male	183	80	23.9	Right	SECOND TESTING 30 min	Erector Spin	Lateral	Sitting	Left	Relaxed	22	617	0.95	8.6	0.56	15	Fabio Valenti	000560	2024	1	5	3	Day
7.33025e+18	2024-01-31 14:06:49	3			1991-08-10	Male	183	80	23.9	Right	SECOND TESTING 30 min	Erector Spin	Lateral	Sitting	Left	Relaxed	21.6	618	0.94	8.6	0.57	15	Fabio Valenti	000560	2024	1	5	3	Day
7.33025e+18	2024-01-31 14:06:50	4			1991-08-10	Male	183	80	23.9	Right	SECOND TESTING 30 min	Erector Spin	Lateral	Sitting	Left	Relaxed	21.5	617	0.93	8.7	0.57	15	Fabio Valenti	000560	2024	1	5	3	Day
7.33025e+18	2024-01-31 14:06:51	5			1991-08-10	Male	183	80	23.9	Right	SECOND TESTING 30 min	Erector Spin	Lateral	Sitting	Left	Relaxed	21.5	620	0.94	8.6	0.57	15	Fabio Valenti	000560	2024	1	5	3	Day
7.33025e+18	2024-01-31 14:06:59	1			1991-08-10	Male	183	80	23.9	Right	SECOND TESTING 30 min	Erector Spin	Lateral	Sitting	Right	Relaxed	20.4	560	1.13	9.6	0.62	15	Fabio Valenti	000560	2024	1	5	3	Day
7.33025e+18	2024-01-31 14:07:00	2			1991-08-10	Male	183	80	23.9	Right	SECOND TESTING 30 min	Erector Spin	Lateral	Sitting	Right	Relaxed	20.4	573	1.1	9.4	0.61	15	Fabio Valenti	000560	2024	1	5	3	Day
7.33025e+18	2024-01-31 14:07:01	3			1991-08-10	Male	183	80	23.9	Right	SECOND TESTING 30 min	Erector Spin	Lateral	Sitting	Right	Relaxed	20.5	579	1.11	9.4	0.61	15	Fabio Valenti	000560	2024	1	5	3	Day
7.33025e+18	2024-01-31 14:07:01	4			1991-08-10	Male	183	80	23.9	Right	SECOND TESTING 30 min	Erector Spin	Lateral	Sitting	Right	Relaxed	20.3	586	1.06	9.2	0.6	15	Fabio Valenti	000560	2024	1	5	3	Day
7.33025e+18	2024-01-31 14:07:02	5			1991-08-10	Male	183	80	23.9	Right	SECOND TESTING 30 min	Erector Spin	Lateral	Sitting	Right	Relaxed	20.3	589	1.06	9.2	0.6	15	Fabio Valenti	000560	2024	1	5	3	Day
7.33061e+18	2024-02-01 13:19:55	1			1991-08-10	Male	183	80	23.9	Right	THIRD TEST 24h	Erector Spin	Lateral	Lying	Left	Relaxed	19.4	363	1.88	14.4	0.91	15	Fabio Valenti	000560	2024	2	5	4	Day
7.33061e+18	2024-02-01 13:19:56	2			1991-08-10	Male	183	80	23.9	Right	THIRD TEST 24h	Erector Spin	Lateral	Lying	Left	Relaxed	19.6	367	1.82	14.5	0.92	15	Fabio Valenti	000560	2024	2	5	4	Day
7.33061e+18	2024-02-01 13:19:58	3			1991-08-10	Male	183	80	23.9	Right	THIRD TEST 24h	Erector Spin	Lateral	Lying	Left	Relaxed	19.5	369	1.77	14.4	0.91	15	Fabio Valenti	000560	2024	2	5	4	Day
7.33061e+18	2024-02-01 13:19:59	4			1991-08-10	Male	183	80	23.9	Right	THIRD TEST 24h	Erector Spin	Lateral	Lying	Left	Relaxed	19.5	366	1.78	14.5	0.92	15	Fabio Valenti	000560	2024	2	5	4	Day
7.33061e+18	2024-02-01 13:19:59	5			1991-08-10	Male	183	80	23.9	Right	THIRD TEST 24h	Erector Spin	Lateral	Lying	Left	Relaxed	19.3	362	1.8	14.8	0.94	15	Fabio Valenti	000560	2024	2	5	4	Day
7.33061e+18	2024-02-01 13:20:07	1			1991-08-10	Male	183	80	23.9	Right	THIRD TEST 24h	Erector Spin	Lateral	Lying	Right	Relaxed	14	297	1.75	17.7	1.09	15	Fabio Valenti	000560	2024	2	5	4	Day
7.33061e+18	2024-02-01 13:20:08	2			1991-08-10	Male	183	80	23.9	Right	THIRD TEST 24h	Erector Spin	Lateral	Lying	Right	Relaxed	13.9	301	1.71	17.7	1.09	15	Fabio Valenti	000560	2024	2	5	4	Day
7.33061e+18	2024-02-01 13:20:09	3			1991-08-10	Male	183	80	23.9	Right	THIRD TEST 24h	Erector Spin	Lateral	Lying	Right	Relaxed	13.9	305	1.74	17.5	1.08	15	Fabio Valenti	000560	2024	2	5	4	Day
7.33061e+18	2024-02-01 13:20:09	4			1991-08-10	Male	183	80	23.9	Right	THIRD TEST 24h	Erector Spin	Lateral	Lying	Right	Relaxed	14	306	1.71	17.5	1.08	15	Fabio Valenti	000560	2024	2	5	4	Day
7.33061e+18	2024-02-01 13:20:10	5			1991-08-10	Male	183	80	23.9	Right	THIRD TEST 24h	Erector Spin	Lateral	Lying	Right	Relaxed	14.1	307	1.7	17.4	1.07	15	Fabio Valenti	000560	2024	2	5	4	Day
7.33061e+18	2024-02-01 13:20:55	1			1991-08-10	Male	183	80	23.9	Right	THIRD TEST 24h	Erector Spin	Lateral	Sitting	Left	Relaxed	19.5	479	1.03	10.9	0.7	15	Fabio Valenti	000560	2024	2	5	4	Day
7.33061e+18	2024-02-01 13:20:56	2			1991-08-10	Male	183	80	23.9	Right	THIRD TEST 24h	Erector Spin	Lateral	Sitting	Left	Relaxed	19.6	489	1	10.7	0.69	15	Fabio Valenti	000560	2024	2	5	4	Day
7.33061e+18	2024-02-01 13:20:57	3			1991-08-10	Male	183	80	23.9	Right	THIRD TEST 24h	Erector Spin	Lateral	Sitting	Left	Relaxed	19.6	503	0.96	10.5	0.68	15	Fabio Valenti	000560	2024	2	5	4	Day
7.33061e+18	2024-02-01 13:20:57	4			1991-08-10	Male	183	80	23.9	Right	THIRD TEST 24h	Erector Spin	Lateral	Sitting	Left	Relaxed	19.5	504	0.98	10.5	0.68	15	Fabio Valenti	000560	2024	2	5	4	Day
7.33061e+18	2024-02-01 13:20:58	5			1991-08-10	Male	183	80	23.9	Right	THIRD TEST 24h	Erector Spin	Lateral	Sitting	Left	Relaxed	19.5	507	0.97	10.5	0.68	15	Fabio Valenti	000560	2024	2	5	4	Day
7.33061e+18	2024-02-01 13:21:51	1			1991-08-10	Male	183	80	23.9	Right	THIRD TEST 24h	Erector Spin	Lateral	Sitting	Right	Relaxed	19.4	560	1.18	9.8	0.63	15	Fabio Valenti	000560	2024	2	5	4	Day
7.33061e+18	2024-02-01 13:21:52	2			1991-08-10	Male	183	80	23.9	Right	THIRD TEST 24h	Erector Spin	Lateral	Sitting	Right	Relaxed	19.3	577	1.14	9.6	0.62	15	Fabio Valenti	000560	2024	2	5	4	Day
7.33061e+18	2024-02-01 13:21:52	3			1991-08-10	Male	183	80	23.9	Right	THIRD TEST 24h	Erector Spin	Lateral	Sitting	Right	Relaxed	19.3	580	1.13	9.6	0.62	15	Fabio Valenti	000560	2024	2	5	4	Day
7.33061e+18	2024-02-01 13:21:53	4			1991-08-10	Male	183	80	23.9	Right	THIRD TEST 24h	Erector Spin	Lateral	Sitting	Right	Relaxed	19.4	582	1.13	9.6	0.62	15	Fabio Valenti	000560	2024	2	5	4	Day
7.33061e+18	2024-02-01 13:21:54	5			1991-08-10	Male	183	80	23.9	Right	THIRD TEST 24h	Erector Spin	Lateral	Sitting	Right	Relaxed	19.4	583	1.12	9.6	0.62	15	Fabio Valenti	000560	2024	2	5	4	Day
7.32426e+18	2024-01-15 10:59:35	1			1980-12-21	Female	153	55	23.5	Right	FIRST TEST	Erector Spin	Lateral	Lying	Left	Relaxed	15.4	261	1.1	18.5	1.09	15	Fabio Valenti	000560	2024	1	3	1	Morning
7.32426e+18	2024-01-15 10:59:35	2			1980-12-21	Female	153	55	23.5	Right	FIRST TEST	Erector Spin	Lateral	Lying	Left	Relaxed	15.5	269	1.09	18.6	1.11	15	Fabio Valenti	000560	2024	1	3	1	Morning
7.32426e+18	2024-01-15 10:59:36	3			1980-12-21	Female	153	55	23.5	Right	FIRST TEST	Erector Spin	Lateral	Lying	Left	Relaxed	15.5	271	1.07	18.3	1.08	15	Fabio Valenti	000560	2024	1	3	1	Morning
7.32426e+18	2024-01-15 10:59:37	4			1980-12-21	Female	153	55	23.5	Right	FIRST TEST	Erector Spin	Lateral	Lying	Left	Relaxed	15.6	272	1.06	18.3	1.09	15	Fabio Valenti	000560	2024	1	3	1	Morning
7.32426e+18	2024-01-15 10:59:39	5			1980-12-21	Female	153	55	23.5	Right	FIRST TEST	Erector Spin	Lateral	Lying	Left	Relaxed	15.7	270	1.06	18.5	1.11	15	Fabio Valenti	000560	2024	1	3	1	Morning
7.32426e+18	2024-01-15 10:59:55	1			1980-12-21	Female	153	55	23.5	Right	FIRST TEST	Erector Spin	Lateral	Lying	Right	Relaxed	16.9	344	1.23	16.6	1.04	15	Fabio Valenti	000560	2024	1	3	1	Morning
7.32426e+18	2024-01-15 10:59:56	2			1980-12-21	Female	153	55	23.5	Right	FIRST TEST	Erector Spin	Lateral	Lying	Right	Relaxed	17	349	1.24	16.6	1.04	15	Fabio Valenti	000560	2024	1	3	1	Morning
7.32426e+18	2024-01-15 10:59:56	3			1980-12-21	Female	153	55	23.5	Right	FIRST TEST	Erector Spin	Lateral	Lying	Right	Relaxed	17	351	1.24	16.4	1.03	15	Fabio Valenti	000560	2024	1	3	1	Morning
7.32426e+18	2024-01-15 10:59:57	4			1980-12-21	Female	153	55	23.5	Right	FIRST TEST	Erector Spin	Lateral	Lying	Right	Relaxed	17	352	1.25	16.4	1.03	15	Fabio Valenti	000560	2024	1	3	1	Morning
7.32426e+18	2024-01-15 10:59:58	5			1980-12-21	Female	153	55	23.5	Right	FIRST TEST	Erector Spin	Lateral	Lying	Right	Relaxed	17	352	1.24	16.4	1.03	15	Fabio Valenti	000560	2024	1	3	1	Morning
7.32426e+18	2024-01-15 11:00:40	1			1980-12-21	Female	153	55	23.5	Right	FIRST TEST	Erector Spin	Lateral	Sitting	Left	Relaxed	23.1	620	0.98	8.6	0.57	15	Fabio Valenti	000560	2024	1	3	1	Morning
7.32426e+18	2024-01-15 11:00:40	2			1980-12-21	Female	153	55	23.5	Right	FIRST TEST	Erector Spin	Lateral	Sitting	Left	Relaxed	23.5	634	1.03	8.4	0.56	15	Fabio Valenti	000560	2024	1	3	1	Morning
7.32426e+18	2024-01-15 11:00:41	3			1980-12-21	Female	153	55	23.5	Right	FIRST TEST	Erector Spin	Lateral	Sitting	Left	Relaxed	23.3	634	1.02	8.4	0.56	15	Fabio Valenti	000560	2024	1	3	1	Morning
7.32426e+18	2024-01-15 11:00:42	4			1980-12-21	Female	153	55	23.5	Right	FIRST TEST	Erector Spin	Lateral	Sitting	Left	Relaxed	23.3	637	1.01	8.4	0.56	15	Fabio Valenti	000560	2024	1	3	1	Morning
7.32426e+18	2024-01-15 11:00:43	5			1980-12-21	Female	153	55	23.5	Right	FIRST TEST	Erector Spin	Lateral	Sitting	Left	Relaxed	23.3	637	1.02	8.4	0.56	15	Fabio Valenti	000560	2024	1	3	1	Morning
7.32426e+18	2024-01-15 11:01:39	1			1980-12-21	Female	153	55	23.5	Right	FIRST TEST	Erector Spin	Lateral	Sitting	Right	Relaxed	23.8	676	1.06	7.9	0.54	15	Fabio Valenti	000560	2024	1	3	1	Morning
7.32426e+18	2024-01-15 11:01:40	2			1980-12-21	Female	153	55	23.5	Right	FIRST TEST	Erector Spin	Lateral	Sitting	Right	Relaxed	23.4	669	1.08	8.1	0.55	15	Fabio Valenti	000560	2024	1	3	1	Morning
7.32426e+18	2024-01-15 11:01:40	3			1980-12-21	Female	153	55	23.5	Right	FIRST TEST	Erector Spin	Lateral	Sitting	Right	Relaxed	23.2	669	1.09	8.1	0.55	15	Fabio Valenti	000560	2024	1	3	1	Morning
7.32426e+18	2024-01-15 11:01:41	4			1980-12-21	Female	153	55	23.5	Right	FIRST TEST	Erector Spin	Lateral	Sitting	Right	Relaxed	23.4	670	1.06	8.1	0.55	15	Fabio Valenti	000560	2024	1	3	1	Morning
7.32426e+18	2024-01-15 11:01:42	5			1980-12-21	Female	153	55	23.5	Right	FIRST TEST	Erector Spin	Lateral	Sitting	Right	Relaxed	23.6	678	1.04	7.9	0.54	15	Fabio Valenti	000560	2024	1	3	1	Morning
7.32427e+18	2024-01-15 11:32:52	1			1980-12-21	Female	153	55	23.5	Right	SECOND TESTING 30 min	Erector Spin	Lateral	Lying	Left	Relaxed	16.7	324	1.29	17.3	1.08	15	Fabio Valenti	000560	2024	1	3	1	Morning
7.32427e+18	2024-01-15 11:32:52	2			1980-12-21	Female	153	55	23.5	Right	SECOND TESTING 30 min	Erector Spin	Lateral	Lying	Left	Relaxed	16.7	328	1.26	17.2	1.08	15	Fabio Valenti	000560	2024	1	3	1	Morning
7.32427e+18	2024-01-15 11:32:53	3			1980-12-21	Female	153	55	23.5	Right	SECOND TESTING 30 min	Erector Spin	Lateral	Lying	Left	Relaxed	16.7	331	1.24	17	1.06	15	Fabio Valenti	000560	2024	1	3	1	Morning
7.32427e+18	2024-01-15 11:32:54	4			1980-12-21	Female	153	55	23.5	Right	SECOND TESTING 30 min	Erector Spin	Lateral	Lying	Left	Relaxed	16.8	333	1.24	17.1	1.07	15	Fabio Valenti	000560	2024	1	3	1	Morning
7.32427e+18	2024-01-15 11:32:55	5			1980-12-21	Female	153	55	23.5	Right	SECOND TESTING 30 min	Erector Spin	Lateral	Lying	Left	Relaxed	16.9	335	1.22	16.8	1.05	15	Fabio Valenti	000560	2024	1	3	1	Morning
7.32427e+18	2024-01-15 11:33:03	1			1980-12-21	Female	153	55	23.5	Right	SECOND TESTING 30 min	Erector Spin	Lateral	Lying	Right	Relaxed	17.5	360	1.34	15.6	0.98	15	Fabio Valenti	000560	2024	1	3	1	Morning
7.32427e+18	2024-01-15 11:33:03	2			1980-12-21	Female	153	55	23.5	Right	SECOND TESTING 30 min	Erector Spin	Lateral	Lying	Right	Relaxed	17.6	370	1.33	15.3	0.96	15	Fabio Valenti	000560	2024	1	3	1	Morning
7.32427e+18	2024-01-15 11:33:04	3			1980-12-21	Female	153	55	23.5	Right	SECOND TESTING 30 min	Erector Spin	Lateral	Lying	Right	Relaxed	17.5	364	1.35	15.5	0.98	15	Fabio Valenti	000560	2024	1	3	1	Morning
7.32427e+18	2024-01-15 11:33:05	4			1980-12-21	Female	153	55	23.5	Right	SECOND TESTING 30 min	Erector Spin	Lateral	Lying	Right	Relaxed	17.9	377	1.33	15	0.95	15	Fabio Valenti	000560	2024	1	3	1	Morning
7.32427e+18	2024-01-15 11:33:06	5			1980-12-21	Female	153	55	23.5	Right	SECOND TESTING 30 min	Erector Spin	Lateral	Lying	Right	Relaxed	17.7	372	1.36	15.3	0.97	15	Fabio Valenti	000560	2024	1	3	1	Morning
7.32427e+18	2024-01-15 11:33:26	1			1980-12-21	Female	153	55	23.5	Right	SECOND TESTING 30 min	Erector Spin	Lateral	Sitting	Left	Relaxed	23.8	670	1.03	7.8	0.53	15	Fabio Valenti	000560	2024	1	3	1	Morning
7.32427e+18	2024-01-15 11:33:27	2			1980-12-21	Female	153	55	23.5	Right	SECOND TESTING 30 min	Erector Spin	Lateral	Sitting	Left	Relaxed	23.5	660	1.04	7.9	0.54	15	Fabio Valenti	000560	2024	1	3	1	Morning
7.32427e+18	2024-01-15 11:33:28	3			1980-12-21	Female	153	55	23.5	Right	SECOND TESTING 30 min	Erector Spin	Lateral	Sitting	Left	Relaxed	23.5	663	1.03	7.9	0.54	15	Fabio Valenti	000560	2024	1	3	1	Morning
7.32427e+18	2024-01-15 11:33:28	4			1980-12-21	Female	153	55	23.5	Right	SECOND TESTING 30 min	Erector Spin	Lateral	Sitting	Left	Relaxed	23.5	665	1	7.8	0.53	15	Fabio Valenti	000560	2024	1	3	1	Morning
7.32427e+18	2024-01-15 11:33:29	5			1980-12-21	Female	153	55	23.5	Right	SECOND TESTING 30 min	Erector Spin	Lateral	Sitting	Left	Relaxed	23.6	668	0.99	7.8	0.53	15	Fabio Valenti	000560	2024	1	3	1	Morning
7.32427e+18	2024-01-15 11:33:35	1			1980-12-21	Female	153	55	23.5	Right	SECOND TESTING 30 min	Erector Spin	Lateral	Sitting	Right	Relaxed	24.9	679	1.16	7.6	0.52	15	Fabio Valenti	000560	2024	1	3	1	Morning
7.32427e+18	2024-01-15 11:33:36	2			1980-12-21	Female	153	55	23.5	Right	SECOND TESTING 30 min	Erector Spin	Lateral	Sitting	Right	Relaxed	24.8	683	1.13	7.6	0.52	15	Fabio Valenti	000560	2024	1	3	1	Morning
7.32427e+18	2024-01-15 11:33:37	3			1980-12-21	Female	153	55	23.5	Right	SECOND TESTING 30 min	Erector Spin	Lateral	Sitting	Right	Relaxed	25	693	1.11	7.6	0.52	15	Fabio Valenti	000560	2024	1	3	1	Morning
7.32427e+18	2024-01-15 11:33:37	4			1980-12-21	Female	153	55	23.5	Right	SECOND TESTING 30 min	Erector Spin	Lateral	Sitting	Right	Relaxed	24.9	691	1.1	7.7	0.53	15	Fabio Valenti	000560	2024	1	3	1	Morning
7.32427e+18	2024-01-15 11:33:38	5			1980-12-21	Female	153	55	23.5	Right	SECOND TESTING 30 min	Erector Spin	Lateral	Sitting	Right	Relaxed	24.8	687	1.1	7.6	0.52	15	Fabio Valenti	000560	2024	1	3	1	Morning
7.32463e+18	2024-01-16 11:00:00	1			1980-12-21	Female	153	55	23.5	Right	THIRD TEST 24h	Erector Spin	Lateral	Lying	Left	Relaxed	15.4	288	1.34	19	1.15	15	Fabio Valenti	000560	2024	1	3	2	Morning
7.32463e+18	2024-01-16 11:00:03	2			1980-12-21	Female	153	55	23.5	Right	THIRD TEST 24h	Erector Spin	Lateral	Lying	Left	Relaxed	15.3	292	1.3	18.8	1.13	15	Fabio Valenti	000560	2024	1	3	2	Morning
7.32463e+18	2024-01-16 11:00:04	3			1980-12-21	Female	153	55	23.5	Right	THIRD TEST 24h	Erector Spin	Lateral	Lying	Left	Relaxed	15.3	286	1.31	19	1.14	15	Fabio Valenti	000560	2024	1	3	2	Morning
7.32463e+18	2024-01-16 11:00:04	4			1980-12-21	Female	153	55	23.5	Right	THIRD TEST 24h	Erector Spin	Lateral	Lying	Left	Relaxed	15.4	291	1.27	18.9	1.14	15	Fabio Valenti	000560	2024	1	3	2	Morning
7.32463e+18	2024-01-16 11:00:05	5			1980-12-21	Female	153	55	23.5	Right	THIRD TEST 24h	Erector Spin	Lateral	Lying	Left	Relaxed	15.5	295	1.29	18.7	1.13	15	Fabio Valenti	000560	2024	1	3	2	Morning
7.32463e+18	2024-01-16 11:00:23	1			1980-12-21	Female	153	55	23.5	Right	THIRD TEST 24h	Erector Spin	Lateral	Lying	Right	Relaxed	16	349	1.64	17	1.08	15	Fabio Valenti	000560	2024	1	3	2	Morning
7.32463e+18	2024-01-16 11:00:23	2			1980-12-21	Female	153	55	23.5	Right	THIRD TEST 24h	Erector Spin	Lateral	Lying	Right	Relaxed	16.4	359	1.54	16.5	1.05	15	Fabio Valenti	000560	2024	1	3	2	Morning
7.32463e+18	2024-01-16 11:00:24	3			1980-12-21	Female	153	55	23.5	Right	THIRD TEST 24h	Erector Spin	Lateral	Lying	Right	Relaxed	16.2	361	1.58	16.6	1.05	15	Fabio Valenti	000560	2024	1	3	2	Morning
7.32463e+18	2024-01-16 11:00:25	4			1980-12-21	Female	153	55	23.5	Right	THIRD TEST 24h	Erector Spin	Lateral	Lying	Right	Relaxed	16.2	369	1.55	16.5	1.05	15	Fabio Valenti	000560	2024	1	3	2	Morning
7.32463e+18	2024-01-16 11:00:25	5			1980-12-21	Female	153	55	23.5	Right	THIRD TEST 24h	Erector Spin	Lateral	Lying	Right	Relaxed	16.3	372	1.53	16.3	1.04	15	Fabio Valenti	000560	2024	1	3	2	Morning
7.32463e+18	2024-01-16 11:00:41	1			1980-12-21	Female	153	55	23.5	Right	THIRD TEST 24h	Erector Spin	Lateral	Sitting	Left	Relaxed	24.3	613	1.16	8.5	0.56	15	Fabio Valenti	000560	2024	1	3	2	Morning
7.32463e+18	2024-01-16 11:00:42	2			1980-12-21	Female	153	55	23.5	Right	THIRD TEST 24h	Erector Spin	Lateral	Sitting	Left	Relaxed	24.3	620	1.21	8.5	0.56	15	Fabio Valenti	000560	2024	1	3	2	Morning
7.32463e+18	2024-01-16 11:00:43	3			1980-12-21	Female	153	55	23.5	Right	THIRD TEST 24h	Erector Spin	Lateral	Sitting	Left	Relaxed	24.2	619	1.19	8.6	0.57	15	Fabio Valenti	000560	2024	1	3	2	Morning
7.32463e+18	2024-01-16 11:00:44	4			1980-12-21	Female	153	55	23.5	Right	THIRD TEST 24h	Erector Spin	Lateral	Sitting	Left	Relaxed	24.1	626	1.18	8.5	0.56	15	Fabio Valenti	000560	2024	1	3	2	Morning
7.32463e+18	2024-01-16 11:00:44	5			1980-12-21	Female	153	55	23.5	Right	THIRD TEST 24h	Erector Spin	Lateral	Sitting	Left	Relaxed	24.2	632	1.13	8.3	0.55	15	Fabio Valenti	000560	2024	1	3	2	Morning
7.32463e+18	2024-01-16 11:00:50	1			1980-12-21	Female	153	55	23.5	Right	THIRD TEST 24h	Erector Spin	Lateral	Sitting	Right	Relaxed	23.4	613	1.21	8.7	0.58	15	Fabio Valenti	000560	2024	1	3	2	Morning
7.32463e+18	2024-01-16 11:00:59	2			1980-12-21	Female	153	55	23.5	Right	THIRD TEST 24h	Erector Spin	Lateral	Sitting	Right	Relaxed	22.9	591	1.21	9	0.6	15	Fabio Valenti	000560	2024	1	3	2	Morning
7.32463e+18	2024-01-16 11:01:00	3			1980-12-21	Female	153	55	23.5	Right	THIRD TEST 24h	Erector Spin	Lateral	Sitting	Right	Relaxed	22.8	594	1.17	9	0.6	15	Fabio Valenti	000560	2024	1	3	2	Morning
7.32463e+18	2024-01-16 11:01:00	4			1980-12-21	Female	153	55	23.5	Right	THIRD TEST 24h	Erector Spin	Lateral	Sitting	Right	Relaxed	22.9	600	1.16	8.9	0.59	15	Fabio Valenti	000560	2024	1	3	2	Morning
7.32463e+18	2024-01-16 11:01:01	5			1980-12-21	Female	153	55	23.5	Right	THIRD TEST 24h	Erector Spin	Lateral	Sitting	Right	Relaxed	23.3	602	1.21	8.9	0.59	15	Fabio Valenti	000560	2024	1	3	2	Morning
7.32503e+18	2024-01-17 12:43:00	1			1988-01-23	Male	194	90	23.9	Right	FIRST TEST	Erector Spin	Lateral	Lying	Left	Relaxed	16.4	281	0.83	16.9	1.03	15	Fabio Valenti	000560	2024	1	3	3	Day
7.32503e+18	2024-01-17 12:43:01	2			1988-01-23	Male	194	90	23.9	Right	FIRST TEST	Erector Spin	Lateral	Lying	Left	Relaxed	16.1	278	0.83	17.4	1.06	15	Fabio Valenti	000560	2024	1	3	3	Day
7.32503e+18	2024-01-17 12:43:02	3			1988-01-23	Male	194	90	23.9	Right	FIRST TEST	Erector Spin	Lateral	Lying	Left	Relaxed	16.1	283	0.82	17.5	1.07	15	Fabio Valenti	000560	2024	1	3	3	Day
7.32503e+18	2024-01-17 12:43:02	4			1988-01-23	Male	194	90	23.9	Right	FIRST TEST	Erector Spin	Lateral	Lying	Left	Relaxed	16.2	282	0.83	17.7	1.09	15	Fabio Valenti	000560	2024	1	3	3	Day
7.32503e+18	2024-01-17 12:43:03	5			1988-01-23	Male	194	90	23.9	Right	FIRST TEST	Erector Spin	Lateral	Lying	Left	Relaxed	16.1	281	0.84	17.8	1.09	15	Fabio Valenti	000560	2024	1	3	3	Day
7.32503e+18	2024-01-17 12:43:12	1			1988-01-23	Male	194	90	23.9	Right	FIRST TEST	Erector Spin	Lateral	Lying	Right	Relaxed	17.6	347	1.09	15.5	0.97	15	Fabio Valenti	000560	2024	1	3	3	Day
7.32503e+18	2024-01-17 12:43:14	2			1988-01-23	Male	194	90	23.9	Right	FIRST TEST	Erector Spin	Lateral	Lying	Right	Relaxed	16.8	339	1.04	15.8	0.99	15	Fabio Valenti	000560	2024	1	3	3	Day
7.32503e+18	2024-01-17 12:43:15	3			1988-01-23	Male	194	90	23.9	Right	FIRST TEST	Erector Spin	Lateral	Lying	Right	Relaxed	16.8	338	1.02	16	1	15	Fabio Valenti	000560	2024	1	3	3	Day
7.32503e+18	2024-01-17 12:43:15	4			1988-01-23	Male	194	90	23.9	Right	FIRST TEST	Erector Spin	Lateral	Lying	Right	Relaxed	17	340	1.03	15.8	0.99	15	Fabio Valenti	000560	2024	1	3	3	Day
7.32503e+18	2024-01-17 12:43:16	5			1988-01-23	Male	194	90	23.9	Right	FIRST TEST	Erector Spin	Lateral	Lying	Right	Relaxed	16.9	339	1.03	15.9	1	15	Fabio Valenti	000560	2024	1	3	3	Day
7.32503e+18	2024-01-17 12:43:47	1			1988-01-23	Male	194	90	23.9	Right	FIRST TEST	Erector Spin	Lateral	Sitting	Left	Relaxed	26.1	741	0.75	7	0.47	15	Fabio Valenti	000560	2024	1	3	3	Day
7.32503e+18	2024-01-17 12:43:48	2			1988-01-23	Male	194	90	23.9	Right	FIRST TEST	Erector Spin	Lateral	Sitting	Left	Relaxed	25.7	730	0.75	7.1	0.48	15	Fabio Valenti	000560	2024	1	3	3	Day
7.32503e+18	2024-01-17 12:43:48	3			1988-01-23	Male	194	90	23.9	Right	FIRST TEST	Erector Spin	Lateral	Sitting	Left	Relaxed	25.8	738	0.75	7.1	0.48	15	Fabio Valenti	000560	2024	1	3	3	Day
7.32503e+18	2024-01-17 12:43:49	4			1988-01-23	Male	194	90	23.9	Right	FIRST TEST	Erector Spin	Lateral	Sitting	Left	Relaxed	25.6	736	0.74	7.1	0.48	15	Fabio Valenti	000560	2024	1	3	3	Day
7.32503e+18	2024-01-17 12:43:50	5			1988-01-23	Male	194	90	23.9	Right	FIRST TEST	Erector Spin	Lateral	Sitting	Left	Relaxed	25.8	747	0.74	6.8	0.46	15	Fabio Valenti	000560	2024	1	3	3	Day
7.32503e+18	2024-01-17 12:44:16	1			1988-01-23	Male	194	90	23.9	Right	FIRST TEST	Erector Spin	Lateral	Sitting	Right	Relaxed	26.6	826	0.9	5.9	0.41	15	Fabio Valenti	000560	2024	1	3	3	Day
7.32503e+18	2024-01-17 12:44:17	2			1988-01-23	Male	194	90	23.9	Right	FIRST TEST	Erector Spin	Lateral	Sitting	Right	Relaxed	26.4	836	0.88	6	0.42	15	Fabio Valenti	000560	2024	1	3	3	Day
7.32503e+18	2024-01-17 12:44:18	3			1988-01-23	Male	194	90	23.9	Right	FIRST TEST	Erector Spin	Lateral	Sitting	Right	Relaxed	26.8	841	0.87	5.9	0.41	15	Fabio Valenti	000560	2024	1	3	3	Day
7.32503e+18	2024-01-17 12:44:18	4			1988-01-23	Male	194	90	23.9	Right	FIRST TEST	Erector Spin	Lateral	Sitting	Right	Relaxed	26.6	839	0.88	5.9	0.41	15	Fabio Valenti	000560	2024	1	3	3	Day
7.32503e+18	2024-01-17 12:44:19	5			1988-01-23	Male	194	90	23.9	Right	FIRST TEST	Erector Spin	Lateral	Sitting	Right	Relaxed	26	837	0.9	5.9	0.41	15	Fabio Valenti	000560	2024	1	3	3	Day
7.32504e+18	2024-01-17 13:13:36	1			1988-01-23	Male	194	90	23.9	Right	SECOND TESTING 30 min	Erector Spin	Lateral	Lying	Left	Relaxed	15.3	289	1.25	18.3	1.13	15	Fabio Valenti	000560	2024	1	3	3	Day
7.32504e+18	2024-01-17 13:13:37	2			1988-01-23	Male	194	90	23.9	Right	SECOND TESTING 30 min	Erector Spin	Lateral	Lying	Left	Relaxed	15.4	297	1.22	18	1.12	15	Fabio Valenti	000560	2024	1	3	3	Day
7.32504e+18	2024-01-17 13:13:37	3			1988-01-23	Male	194	90	23.9	Right	SECOND TESTING 30 min	Erector Spin	Lateral	Lying	Left	Relaxed	15.5	300	1.24	17.8	1.11	15	Fabio Valenti	000560	2024	1	3	3	Day
7.32504e+18	2024-01-17 13:13:38	4			1988-01-23	Male	194	90	23.9	Right	SECOND TESTING 30 min	Erector Spin	Lateral	Lying	Left	Relaxed	15.4	301	1.23	17.8	1.11	15	Fabio Valenti	000560	2024	1	3	3	Day
7.32504e+18	2024-01-17 13:13:39	5			1988-01-23	Male	194	90	23.9	Right	SECOND TESTING 30 min	Erector Spin	Lateral	Lying	Left	Relaxed	15.5	309	1.21	17.6	1.1	15	Fabio Valenti	000560	2024	1	3	3	Day
7.32504e+18	2024-01-17 13:13:47	1			1988-01-23	Male	194	90	23.9	Right	SECOND TESTING 30 min	Erector Spin	Lateral	Lying	Right	Relaxed	16.6	318	1.18	16.9	1.05	15	Fabio Valenti	000560	2024	1	3	3	Day
7.32504e+18	2024-01-17 13:13:48	2			1988-01-23	Male	194	90	23.9	Right	SECOND TESTING 30 min	Erector Spin	Lateral	Lying	Right	Relaxed	16.7	333	1.15	16.6	1.04	15	Fabio Valenti	000560	2024	1	3	3	Day
7.32504e+18	2024-01-17 13:13:49	3			1988-01-23	Male	194	90	23.9	Right	SECOND TESTING 30 min	Erector Spin	Lateral	Lying	Right	Relaxed	16.8	330	1.14	16.3	1.02	15	Fabio Valenti	000560	2024	1	3	3	Day
7.32504e+18	2024-01-17 13:13:49	4			1988-01-23	Male	194	90	23.9	Right	SECOND TESTING 30 min	Erector Spin	Lateral	Lying	Right	Relaxed	16.9	336	1.15	16.4	1.02	15	Fabio Valenti	000560	2024	1	3	3	Day
7.32504e+18	2024-01-17 13:13:50	5			1988-01-23	Male	194	90	23.9	Right	SECOND TESTING 30 min	Erector Spin	Lateral	Lying	Right	Relaxed	16.9	337	1.11	16.3	1.02	15	Fabio Valenti	000560	2024	1	3	3	Day
7.32504e+18	2024-01-17 13:14:14	1			1988-01-23	Male	194	90	23.9	Right	SECOND TESTING 30 min	Erector Spin	Lateral	Sitting	Left	Relaxed	24.6	720	0.76	7.3	0.49	15	Fabio Valenti	000560	2024	1	3	3	Day
7.32504e+18	2024-01-17 13:14:15	2			1988-01-23	Male	194	90	23.9	Right	SECOND TESTING 30 min	Erector Spin	Lateral	Sitting	Left	Relaxed	23.9	720	0.82	7.1	0.48	15	Fabio Valenti	000560	2024	1	3	3	Day
7.32504e+18	2024-01-17 13:14:16	3			1988-01-23	Male	194	90	23.9	Right	SECOND TESTING 30 min	Erector Spin	Lateral	Sitting	Left	Relaxed	23.7	720	0.81	7	0.47	15	Fabio Valenti	000560	2024	1	3	3	Day
7.32504e+18	2024-01-17 13:14:16	4			1988-01-23	Male	194	90	23.9	Right	SECOND TESTING 30 min	Erector Spin	Lateral	Sitting	Left	Relaxed	23.8	728	0.79	7	0.47	15	Fabio Valenti	000560	2024	1	3	3	Day
7.32504e+18	2024-01-17 13:14:19	5			1988-01-23	Male	194	90	23.9	Right	SECOND TESTING 30 min	Erector Spin	Lateral	Sitting	Left	Relaxed	23.9	744	0.78	6.9	0.47	15	Fabio Valenti	000560	2024	1	3	3	Day
7.32504e+18	2024-01-17 13:14:40	1			1988-01-23	Male	194	90	23.9	Right	SECOND TESTING 30 min	Erector Spin	Lateral	Sitting	Right	Relaxed	25.5	791	0.76	6.5	0.45	15	Fabio Valenti	000560	2024	1	3	3	Day
7.32504e+18	2024-01-17 13:14:41	2			1988-01-23	Male	194	90	23.9	Right	SECOND TESTING 30 min	Erector Spin	Lateral	Sitting	Right	Relaxed	25.6	799	0.74	6.4	0.44	15	Fabio Valenti	000560	2024	1	3	3	Day
7.32504e+18	2024-01-17 13:14:41	3			1988-01-23	Male	194	90	23.9	Right	SECOND TESTING 30 min	Erector Spin	Lateral	Sitting	Right	Relaxed	25.7	793	0.72	6.4	0.44	15	Fabio Valenti	000560	2024	1	3	3	Day
7.32504e+18	2024-01-17 13:14:42	4			1988-01-23	Male	194	90	23.9	Right	SECOND TESTING 30 min	Erector Spin	Lateral	Sitting	Right	Relaxed	25.4	796	0.74	6.4	0.44	15	Fabio Valenti	000560	2024	1	3	3	Day
7.32504e+18	2024-01-17 13:14:44	5			1988-01-23	Male	194	90	23.9	Right	SECOND TESTING 30 min	Erector Spin	Lateral	Sitting	Right	Relaxed	25.6	790	0.71	6.4	0.44	15	Fabio Valenti	000560	2024	1	3	3	Day
7.3254e+18	2024-01-18 12:34:07	1			1988-01-23	Male	194	90	23.9	Right	THIRD TEST 24h	Erector Spin	Lateral	Lying	Left	Relaxed	15.4	264	1.15	19.9	1.23	15	Fabio Valenti	000560	2024	1	3	4	Day
7.3254e+18	2024-01-18 12:34:08	2			1988-01-23	Male	194	90	23.9	Right	THIRD TEST 24h	Erector Spin	Lateral	Lying	Left	Relaxed	15.4	266	1.13	19.7	1.23	15	Fabio Valenti	000560	2024	1	3	4	Day
7.3254e+18	2024-01-18 12:34:08	3			1988-01-23	Male	194	90	23.9	Right	THIRD TEST 24h	Erector Spin	Lateral	Lying	Left	Relaxed	15.4	275	1.11	19.7	1.23	15	Fabio Valenti	000560	2024	1	3	4	Day
7.3254e+18	2024-01-18 12:34:09	4			1988-01-23	Male	194	90	23.9	Right	THIRD TEST 24h	Erector Spin	Lateral	Lying	Left	Relaxed	15.4	277	1.12	19.5	1.22	15	Fabio Valenti	000560	2024	1	3	4	Day
7.3254e+18	2024-01-18 12:34:11	5			1988-01-23	Male	194	90	23.9	Right	THIRD TEST 24h	Erector Spin	Lateral	Lying	Left	Relaxed	15.5	275	1.12	19.5	1.22	15	Fabio Valenti	000560	2024	1	3	4	Day
7.3254e+18	2024-01-18 12:34:18	1			1988-01-23	Male	194	90	23.9	Right	THIRD TEST 24h	Erector Spin	Lateral	Lying	Right	Relaxed	16.2	287	1.07	18.4	1.12	15	Fabio Valenti	000560	2024	1	3	4	Day
7.3254e+18	2024-01-18 12:34:18	2			1988-01-23	Male	194	90	23.9	Right	THIRD TEST 24h	Erector Spin	Lateral	Lying	Right	Relaxed	16.1	289	1.04	18.2	1.13	15	Fabio Valenti	000560	2024	1	3	4	Day
7.3254e+18	2024-01-18 12:34:19	3			1988-01-23	Male	194	90	23.9	Right	THIRD TEST 24h	Erector Spin	Lateral	Lying	Right	Relaxed	16.1	297	1.03	18.2	1.13	15	Fabio Valenti	000560	2024	1	3	4	Day
7.3254e+18	2024-01-18 12:34:20	4			1988-01-23	Male	194	90	23.9	Right	THIRD TEST 24h	Erector Spin	Lateral	Lying	Right	Relaxed	16.2	300	1.03	17.9	1.12	15	Fabio Valenti	000560	2024	1	3	4	Day
7.3254e+18	2024-01-18 12:34:20	5			1988-01-23	Male	194	90	23.9	Right	THIRD TEST 24h	Erector Spin	Lateral	Lying	Right	Relaxed	16.2	303	1.02	17.8	1.11	15	Fabio Valenti	000560	2024	1	3	4	Day
7.3254e+18	2024-01-18 12:34:42	1			1988-01-23	Male	194	90	23.9	Right	THIRD TEST 24h	Erector Spin	Lateral	Sitting	Left	Relaxed	23.9	617	0.77	8.4	0.54	15	Fabio Valenti	000560	2024	1	3	4	Day
7.3254e+18	2024-01-18 12:34:43	2			1988-01-23	Male	194	90	23.9	Right	THIRD TEST 24h	Erector Spin	Lateral	Sitting	Left	Relaxed	23.5	611	0.75	8.4	0.54	15	Fabio Valenti	000560	2024	1	3	4	Day
7.3254e+18	2024-01-18 12:34:44	3			1988-01-23	Male	194	90	23.9	Right	THIRD TEST 24h	Erector Spin	Lateral	Sitting	Left	Relaxed	23.4	612	0.75	8.4	0.54	15	Fabio Valenti	000560	2024	1	3	4	Day
7.3254e+18	2024-01-18 12:34:45	4			1988-01-23	Male	194	90	23.9	Right	THIRD TEST 24h	Erector Spin	Lateral	Sitting	Left	Relaxed	23.4	621	0.74	8.3	0.54	15	Fabio Valenti	000560	2024	1	3	4	Day
7.3254e+18	2024-01-18 12:34:45	5			1988-01-23	Male	194	90	23.9	Right	THIRD TEST 24h	Erector Spin	Lateral	Sitting	Left	Relaxed	23.5	618	0.72	8.4	0.54	15	Fabio Valenti	000560	2024	1	3	4	Day
7.3254e+18	2024-01-18 12:34:52	1			1988-01-23	Male	194	90	23.9	Right	THIRD TEST 24h	Erector Spin	Lateral	Sitting	Right	Relaxed	25.5	694	0.75	7.5	0.49	15	Fabio Valenti	000560	2024	1	3	4	Day
7.3254e+18	2024-01-18 12:34:53	2			1988-01-23	Male	194	90	23.9	Right	THIRD TEST 24h	Erector Spin	Lateral	Sitting	Right	Relaxed	25.4	698	0.72	7.4	0.49	15	Fabio Valenti	000560	2024	1	3	4	Day
7.3254e+18	2024-01-18 12:34:53	3			1988-01-23	Male	194	90	23.9	Right	THIRD TEST 24h	Erector Spin	Lateral	Sitting	Right	Relaxed	25.2	698	0.72	7.4	0.49	15	Fabio Valenti	000560	2024	1	3	4	Day
7.3254e+18	2024-01-18 12:34:54	4			1988-01-23	Male	194	90	23.9	Right	THIRD TEST 24h	Erector Spin	Lateral	Sitting	Right	Relaxed	24.9	693	0.74	7.4	0.49	15	Fabio Valenti	000560	2024	1	3	4	Day
7.3254e+18	2024-01-18 12:34:55	5			1988-01-23	Male	194	90	23.9	Right	THIRD TEST 24h	Erector Spin	Lateral	Sitting	Right	Relaxed	25.4	708	0.72	7.4	0.49	15	Fabio Valenti	000560	2024	1	3	4	Day
7.32278e+18	2024-01-11 10:57:39	1			1978-07-17	Female	180	80	24.7	Right	FIRST TEST	Erector Spin	Lateral	Lying	Left	Relaxed	14.9	281	1.66	19	1.16	15	Fabio Valenti	000560	2024	1	2	4	Morning
7.32278e+18	2024-01-11 10:57:40	2			1978-07-17	Female	180	80	24.7	Right	FIRST TEST	Erector Spin	Lateral	Lying	Left	Relaxed	14.9	287	1.61	18.7	1.14	15	Fabio Valenti	000560	2024	1	2	4	Morning
7.32278e+18	2024-01-11 10:57:40	3			1978-07-17	Female	180	80	24.7	Right	FIRST TEST	Erector Spin	Lateral	Lying	Left	Relaxed	14.8	289	1.64	18.8	1.14	15	Fabio Valenti	000560	2024	1	2	4	Morning
7.32278e+18	2024-01-11 10:57:41	4			1978-07-17	Female	180	80	24.7	Right	FIRST TEST	Erector Spin	Lateral	Lying	Left	Relaxed	14.7	289	1.63	18.7	1.13	15	Fabio Valenti	000560	2024	1	2	4	Morning
7.32278e+18	2024-01-11 10:57:42	5			1978-07-17	Female	180	80	24.7	Right	FIRST TEST	Erector Spin	Lateral	Lying	Left	Relaxed	14.8	291	1.6	18.5	1.13	15	Fabio Valenti	000560	2024	1	2	4	Morning
7.32278e+18	2024-01-11 10:57:51	1			1978-07-17	Female	180	80	24.7	Right	FIRST TEST	Erector Spin	Lateral	Lying	Right	Relaxed	15	291	1.57	19	1.16	15	Fabio Valenti	000560	2024	1	2	4	Morning
7.32278e+18	2024-01-11 10:57:52	2			1978-07-17	Female	180	80	24.7	Right	FIRST TEST	Erector Spin	Lateral	Lying	Right	Relaxed	14.6	280	1.55	19.8	1.21	15	Fabio Valenti	000560	2024	1	2	4	Morning
7.32278e+18	2024-01-11 10:57:53	3			1978-07-17	Female	180	80	24.7	Right	FIRST TEST	Erector Spin	Lateral	Lying	Right	Relaxed	14.4	280	1.54	19.9	1.22	15	Fabio Valenti	000560	2024	1	2	4	Morning
7.32278e+18	2024-01-11 10:57:53	4			1978-07-17	Female	180	80	24.7	Right	FIRST TEST	Erector Spin	Lateral	Lying	Right	Relaxed	14.4	283	1.52	19.8	1.21	15	Fabio Valenti	000560	2024	1	2	4	Morning
7.32278e+18	2024-01-11 10:57:54	5			1978-07-17	Female	180	80	24.7	Right	FIRST TEST	Erector Spin	Lateral	Lying	Right	Relaxed	14.4	283	1.47	19.8	1.21	15	Fabio Valenti	000560	2024	1	2	4	Morning
7.32278e+18	2024-01-11 10:58:18	1			1978-07-17	Female	180	80	24.7	Right	FIRST TEST	Erector Spin	Lateral	Sitting	Left	Relaxed	21.3	543	0.96	9.8	0.63	15	Fabio Valenti	000560	2024	1	2	4	Morning
7.32278e+18	2024-01-11 10:58:19	2			1978-07-17	Female	180	80	24.7	Right	FIRST TEST	Erector Spin	Lateral	Sitting	Left	Relaxed	21	547	0.93	9.8	0.63	15	Fabio Valenti	000560	2024	1	2	4	Morning
7.32278e+18	2024-01-11 10:58:19	3			1978-07-17	Female	180	80	24.7	Right	FIRST TEST	Erector Spin	Lateral	Sitting	Left	Relaxed	20.7	547	0.93	9.8	0.63	15	Fabio Valenti	000560	2024	1	2	4	Morning
7.32278e+18	2024-01-11 10:58:20	4			1978-07-17	Female	180	80	24.7	Right	FIRST TEST	Erector Spin	Lateral	Sitting	Left	Relaxed	20.9	550	0.91	9.8	0.63	15	Fabio Valenti	000560	2024	1	2	4	Morning
7.32278e+18	2024-01-11 10:58:21	5			1978-07-17	Female	180	80	24.7	Right	FIRST TEST	Erector Spin	Lateral	Sitting	Left	Relaxed	20.8	552	0.91	9.8	0.63	15	Fabio Valenti	000560	2024	1	2	4	Morning
7.32278e+18	2024-01-11 10:58:30	1			1978-07-17	Female	180	80	24.7	Right	FIRST TEST	Erector Spin	Lateral	Sitting	Right	Relaxed	21.9	549	0.92	9.8	0.63	15	Fabio Valenti	000560	2024	1	2	4	Morning
7.32278e+18	2024-01-11 10:58:30	2			1978-07-17	Female	180	80	24.7	Right	FIRST TEST	Erector Spin	Lateral	Sitting	Right	Relaxed	21.5	548	0.9	9.9	0.64	15	Fabio Valenti	000560	2024	1	2	4	Morning
7.32278e+18	2024-01-11 10:58:31	3			1978-07-17	Female	180	80	24.7	Right	FIRST TEST	Erector Spin	Lateral	Sitting	Right	Relaxed	21.9	564	0.9	9.8	0.63	15	Fabio Valenti	000560	2024	1	2	4	Morning
7.32278e+18	2024-01-11 10:58:32	4			1978-07-17	Female	180	80	24.7	Right	FIRST TEST	Erector Spin	Lateral	Sitting	Right	Relaxed	22.1	568	0.89	9.6	0.62	15	Fabio Valenti	000560	2024	1	2	4	Morning
7.32278e+18	2024-01-11 10:58:33	5			1978-07-17	Female	180	80	24.7	Right	FIRST TEST	Erector Spin	Lateral	Sitting	Right	Relaxed	22.1	572	0.88	9.6	0.62	15	Fabio Valenti	000560	2024	1	2	4	Morning
7.3228e+18	2024-01-11 12:14:24	1			1978-07-17	Female	180	80	24.7	Right	SECOND TESTING 30 min	Erector Spin	Lateral	Lying	Left	Relaxed	17.1	374	1.68	14.8	0.92	15	Fabio Valenti	000560	2024	1	2	4	Day
7.3228e+18	2024-01-11 12:14:24	2			1978-07-17	Female	180	80	24.7	Right	SECOND TESTING 30 min	Erector Spin	Lateral	Lying	Left	Relaxed	17.1	388	1.67	14.8	0.93	15	Fabio Valenti	000560	2024	1	2	4	Day
7.3228e+18	2024-01-11 12:14:25	3			1978-07-17	Female	180	80	24.7	Right	SECOND TESTING 30 min	Erector Spin	Lateral	Lying	Left	Relaxed	17.2	388	1.69	14.9	0.94	15	Fabio Valenti	000560	2024	1	2	4	Day
7.3228e+18	2024-01-11 12:14:26	4			1978-07-17	Female	180	80	24.7	Right	SECOND TESTING 30 min	Erector Spin	Lateral	Lying	Left	Relaxed	17.3	393	1.65	14.5	0.93	15	Fabio Valenti	000560	2024	1	2	4	Day
7.3228e+18	2024-01-11 12:14:29	5			1978-07-17	Female	180	80	24.7	Right	SECOND TESTING 30 min	Erector Spin	Lateral	Lying	Left	Relaxed	16.9	388	1.69	14.8	0.93	15	Fabio Valenti	000560	2024	1	2	4	Day
7.3228e+18	2024-01-11 12:14:35	1			1978-07-17	Female	180	80	24.7	Right	SECOND TESTING 30 min	Erector Spin	Lateral	Lying	Right	Relaxed	15.4	319	1.49	17.7	1.09	15	Fabio Valenti	000560	2024	1	2	4	Day
7.3228e+18	2024-01-11 12:14:36	2			1978-07-17	Female	180	80	24.7	Right	SECOND TESTING 30 min	Erector Spin	Lateral	Lying	Right	Relaxed	15.3	324	1.45	17.6	1.09	15	Fabio Valenti	000560	2024	1	2	4	Day
7.3228e+18	2024-01-11 12:14:37	3			1978-07-17	Female	180	80	24.7	Right	SECOND TESTING 30 min	Erector Spin	Lateral	Lying	Right	Relaxed	15.3	326	1.44	17.5	1.09	15	Fabio Valenti	000560	2024	1	2	4	Day
7.3228e+18	2024-01-11 12:14:37	4			1978-07-17	Female	180	80	24.7	Right	SECOND TESTING 30 min	Erector Spin	Lateral	Lying	Right	Relaxed	15.2	328	1.44	17.4	1.08	15	Fabio Valenti	000560	2024	1	2	4	Day
7.3228e+18	2024-01-11 12:14:38	5			1978-07-17	Female	180	80	24.7	Right	SECOND TESTING 30 min	Erector Spin	Lateral	Lying	Right	Relaxed	15.2	328	1.45	17.4	1.08	15	Fabio Valenti	000560	2024	1	2	4	Day
7.3228e+18	2024-01-11 12:15:17	1			1978-07-17	Female	180	80	24.7	Right	SECOND TESTING 30 min	Erector Spin	Lateral	Sitting	Left	Relaxed	19.7	428	1.07	12.8	0.81	15	Fabio Valenti	000560	2024	1	2	4	Day
7.3228e+18	2024-01-11 12:15:18	2			1978-07-17	Female	180	80	24.7	Right	SECOND TESTING 30 min	Erector Spin	Lateral	Sitting	Left	Relaxed	19.5	432	1.06	12.6	0.79	15	Fabio Valenti	000560	2024	1	2	4	Day
7.3228e+18	2024-01-11 12:15:19	3			1978-07-17	Female	180	80	24.7	Right	SECOND TESTING 30 min	Erector Spin	Lateral	Sitting	Left	Relaxed	19.3	428	1.05	12.8	0.8	15	Fabio Valenti	000560	2024	1	2	4	Day
7.3228e+18	2024-01-11 12:15:19	4			1978-07-17	Female	180	80	24.7	Right	SECOND TESTING 30 min	Erector Spin	Lateral	Sitting	Left	Relaxed	19.1	431	1.05	12.8	0.8	15	Fabio Valenti	000560	2024	1	2	4	Day
7.3228e+18	2024-01-11 12:15:20	5			1978-07-17	Female	180	80	24.7	Right	SECOND TESTING 30 min	Erector Spin	Lateral	Sitting	Left	Relaxed	19.5	435	1.03	12.6	0.79	15	Fabio Valenti	000560	2024	1	2	4	Day
7.3228e+18	2024-01-11 12:15:26	1			1978-07-17	Female	180	80	24.7	Right	SECOND TESTING 30 min	Erector Spin	Lateral	Sitting	Right	Relaxed	22.8	602	1.13	9.1	0.6	15	Fabio Valenti	000560	2024	1	2	4	Day
7.3228e+18	2024-01-11 12:15:27	2			1978-07-17	Female	180	80	24.7	Right	SECOND TESTING 30 min	Erector Spin	Lateral	Sitting	Right	Relaxed	22.4	607	1.11	8.9	0.59	15	Fabio Valenti	000560	2024	1	2	4	Day
7.3228e+18	2024-01-11 12:15:28	3			1978-07-17	Female	180	80	24.7	Right	SECOND TESTING 30 min	Erector Spin	Lateral	Sitting	Right	Relaxed	22.2	610	1.11	9	0.59	15	Fabio Valenti	000560	2024	1	2	4	Day
7.3228e+18	2024-01-11 12:15:29	4			1978-07-17	Female	180	80	24.7	Right	SECOND TESTING 30 min	Erector Spin	Lateral	Sitting	Right	Relaxed	22.4	611	1.09	8.9	0.59	15	Fabio Valenti	000560	2024	1	2	4	Day
7.3228e+18	2024-01-11 12:15:29	5			1978-07-17	Female	180	80	24.7	Right	SECOND TESTING 30 min	Erector Spin	Lateral	Sitting	Right	Relaxed	22.1	610	1.09	9	0.59	15	Fabio Valenti	000560	2024	1	2	4	Day
7.32315e+18	2024-01-12 11:01:04	1			1978-07-17	Female	180	80	24.7	Right	THIRD TEST 24h	Erector Spin	Lateral	Lying	Left	Relaxed	17.3	380	1.54	14.7	0.92	15	Fabio Valenti	000560	2024	1	2	5	Morning
7.32315e+18	2024-01-12 11:01:05	2			1978-07-17	Female	180	80	24.7	Right	THIRD TEST 24h	Erector Spin	Lateral	Lying	Left	Relaxed	17.2	385	1.51	14.7	0.92	15	Fabio Valenti	000560	2024	1	2	5	Morning
7.32315e+18	2024-01-12 11:01:06	3			1978-07-17	Female	180	80	24.7	Right	THIRD TEST 24h	Erector Spin	Lateral	Lying	Left	Relaxed	17	388	1.52	14.7	0.92	15	Fabio Valenti	000560	2024	1	2	5	Morning
7.32315e+18	2024-01-12 11:01:06	4			1978-07-17	Female	180	80	24.7	Right	THIRD TEST 24h	Erector Spin	Lateral	Lying	Left	Relaxed	17.4	390	1.49	14.7	0.93	15	Fabio Valenti	000560	2024	1	2	5	Morning
7.32315e+18	2024-01-12 11:01:07	5			1978-07-17	Female	180	80	24.7	Right	THIRD TEST 24h	Erector Spin	Lateral	Lying	Left	Relaxed	17.6	395	1.48	14.4	0.91	15	Fabio Valenti	000560	2024	1	2	5	Morning
7.32315e+18	2024-01-12 11:01:43	1			1978-07-17	Female	180	80	24.7	Right	THIRD TEST 24h	Erector Spin	Lateral	Lying	Right	Relaxed	17.6	361	1.42	15.7	0.98	15	Fabio Valenti	000560	2024	1	2	5	Morning
7.32315e+18	2024-01-12 11:01:43	2			1978-07-17	Female	180	80	24.7	Right	THIRD TEST 24h	Erector Spin	Lateral	Lying	Right	Relaxed	17.6	362	1.39	15.6	0.97	15	Fabio Valenti	000560	2024	1	2	5	Morning
7.32315e+18	2024-01-12 11:01:44	3			1978-07-17	Female	180	80	24.7	Right	THIRD TEST 24h	Erector Spin	Lateral	Lying	Right	Relaxed	17.6	363	1.37	15.5	0.97	15	Fabio Valenti	000560	2024	1	2	5	Morning
7.32315e+18	2024-01-12 11:01:45	4			1978-07-17	Female	180	80	24.7	Right	THIRD TEST 24h	Erector Spin	Lateral	Lying	Right	Relaxed	17.6	364	1.37	15.6	0.98	15	Fabio Valenti	000560	2024	1	2	5	Morning
7.32315e+18	2024-01-12 11:01:45	5			1978-07-17	Female	180	80	24.7	Right	THIRD TEST 24h	Erector Spin	Lateral	Lying	Right	Relaxed	17.6	363	1.36	15.5	0.97	15	Fabio Valenti	000560	2024	1	2	5	Morning
7.32315e+18	2024-01-12 11:02:03	1			1978-07-17	Female	180	80	24.7	Right	THIRD TEST 24h	Erector Spin	Lateral	Sitting	Left	Relaxed	20.8	518	0.96	10.3	0.66	15	Fabio Valenti	000560	2024	1	2	5	Morning
7.32315e+18	2024-01-12 11:02:03	2			1978-07-17	Female	180	80	24.7	Right	THIRD TEST 24h	Erector Spin	Lateral	Sitting	Left	Relaxed	20.8	532	0.93	10.1	0.65	15	Fabio Valenti	000560	2024	1	2	5	Morning
7.32315e+18	2024-01-12 11:02:04	3			1978-07-17	Female	180	80	24.7	Right	THIRD TEST 24h	Erector Spin	Lateral	Sitting	Left	Relaxed	20.9	542	0.91	9.9	0.64	15	Fabio Valenti	000560	2024	1	2	5	Morning
7.32315e+18	2024-01-12 11:02:05	4			1978-07-17	Female	180	80	24.7	Right	THIRD TEST 24h	Erector Spin	Lateral	Sitting	Left	Relaxed	20.9	543	0.91	9.9	0.64	15	Fabio Valenti	000560	2024	1	2	5	Morning
7.32315e+18	2024-01-12 11:02:06	5			1978-07-17	Female	180	80	24.7	Right	THIRD TEST 24h	Erector Spin	Lateral	Sitting	Left	Relaxed	21.1	551	0.91	9.8	0.63	15	Fabio Valenti	000560	2024	1	2	5	Morning
7.32315e+18	2024-01-12 11:02:13	1			1978-07-17	Female	180	80	24.7	Right	THIRD TEST 24h	Erector Spin	Lateral	Sitting	Right	Relaxed	22.8	600	0.91	9.1	0.59	15	Fabio Valenti	000560	2024	1	2	5	Morning
7.32315e+18	2024-01-12 11:02:14	2			1978-07-17	Female	180	80	24.7	Right	THIRD TEST 24h	Erector Spin	Lateral	Sitting	Right	Relaxed	22.8	610	0.89	9	0.59	15	Fabio Valenti	000560	2024	1	2	5	Morning
7.32315e+18	2024-01-12 11:02:15	3			1978-07-17	Female	180	80	24.7	Right	THIRD TEST 24h	Erector Spin	Lateral	Sitting	Right	Relaxed	22.6	612	0.87	9	0.59	15	Fabio Valenti	000560	2024	1	2	5	Morning
7.32315e+18	2024-01-12 11:02:15	4			1978-07-17	Female	180	80	24.7	Right	THIRD TEST 24h	Erector Spin	Lateral	Sitting	Right	Relaxed	22.8	616	0.88	8.9	0.58	15	Fabio Valenti	000560	2024	1	2	5	Morning
7.32315e+18	2024-01-12 11:02:18	5			1978-07-17	Female	180	80	24.7	Right	THIRD TEST 24h	Erector Spin	Lateral	Sitting	Right	Relaxed	22.6	619	0.86	8.8	0.58	15	Fabio Valenti	000560	2024	1	2	5	Morning
7.32277e+18	2024-01-11 10:29:50	1			1976-02-02	Male	175	90	29.4	Right	FIRST TEST	Erector Spin	Lateral	Lying	Left	Relaxed	16.8	374	1.61	15.2	0.95	15	Fabio Valenti	000560	2024	1	2	4	Morning
7.32277e+18	2024-01-11 10:29:51	2			1976-02-02	Male	175	90	29.4	Right	FIRST TEST	Erector Spin	Lateral	Lying	Left	Relaxed	16.5	377	1.62	15.5	0.97	15	Fabio Valenti	000560	2024	1	2	4	Morning
7.32277e+18	2024-01-11 10:29:51	3			1976-02-02	Male	175	90	29.4	Right	FIRST TEST	Erector Spin	Lateral	Lying	Left	Relaxed	16.5	375	1.59	15.4	0.96	15	Fabio Valenti	000560	2024	1	2	4	Morning
7.32277e+18	2024-01-11 10:29:52	4			1976-02-02	Male	175	90	29.4	Right	FIRST TEST	Erector Spin	Lateral	Lying	Left	Relaxed	16.6	378	1.59	15.5	0.97	15	Fabio Valenti	000560	2024	1	2	4	Morning
7.32277e+18	2024-01-11 10:29:53	5			1976-02-02	Male	175	90	29.4	Right	FIRST TEST	Erector Spin	Lateral	Lying	Left	Relaxed	16.5	376	1.57	15.5	0.97	15	Fabio Valenti	000560	2024	1	2	4	Morning
7.32277e+18	2024-01-11 10:30:27	1			1976-02-02	Male	175	90	29.4	Right	FIRST TEST	Erector Spin	Lateral	Lying	Right	Relaxed	17.6	365	1.33	15.3	0.95	15	Fabio Valenti	000560	2024	1	2	4	Morning
7.32277e+18	2024-01-11 10:30:27	2			1976-02-02	Male	175	90	29.4	Right	FIRST TEST	Erector Spin	Lateral	Lying	Right	Relaxed	17.3	367	1.38	15.4	0.95	15	Fabio Valenti	000560	2024	1	2	4	Morning
7.32277e+18	2024-01-11 10:30:28	3			1976-02-02	Male	175	90	29.4	Right	FIRST TEST	Erector Spin	Lateral	Lying	Right	Relaxed	17.1	366	1.34	15.4	0.95	15	Fabio Valenti	000560	2024	1	2	4	Morning
7.32277e+18	2024-01-11 10:30:29	4			1976-02-02	Male	175	90	29.4	Right	FIRST TEST	Erector Spin	Lateral	Lying	Right	Relaxed	17	368	1.35	15.4	0.95	15	Fabio Valenti	000560	2024	1	2	4	Morning
7.32277e+18	2024-01-11 10:30:29	5			1976-02-02	Male	175	90	29.4	Right	FIRST TEST	Erector Spin	Lateral	Lying	Right	Relaxed	17	367	1.33	15.5	0.96	15	Fabio Valenti	000560	2024	1	2	4	Morning
7.32277e+18	2024-01-11 10:30:59	1			1976-02-02	Male	175	90	29.4	Right	FIRST TEST	Erector Spin	Lateral	Sitting	Left	Relaxed	21.9	596	1.02	9	0.59	15	Fabio Valenti	000560	2024	1	2	4	Morning
7.32277e+18	2024-01-11 10:31:00	2			1976-02-02	Male	175	90	29.4	Right	FIRST TEST	Erector Spin	Lateral	Sitting	Left	Relaxed	21.6	598	1.02	9.1	0.6	15	Fabio Valenti	000560	2024	1	2	4	Morning
7.32277e+18	2024-01-11 10:31:01	3			1976-02-02	Male	175	90	29.4	Right	FIRST TEST	Erector Spin	Lateral	Sitting	Left	Relaxed	21.5	599	0.99	9.1	0.6	15	Fabio Valenti	000560	2024	1	2	4	Morning
7.32277e+18	2024-01-11 10:31:02	4			1976-02-02	Male	175	90	29.4	Right	FIRST TEST	Erector Spin	Lateral	Sitting	Left	Relaxed	21.2	595	1	9.2	0.6	15	Fabio Valenti	000560	2024	1	2	4	Morning
7.32277e+18	2024-01-11 10:31:02	5			1976-02-02	Male	175	90	29.4	Right	FIRST TEST	Erector Spin	Lateral	Sitting	Left	Relaxed	21	594	0.99	9.2	0.6	15	Fabio Valenti	000560	2024	1	2	4	Morning
7.32277e+18	2024-01-11 10:31:12	1			1976-02-02	Male	175	90	29.4	Right	FIRST TEST	Erector Spin	Lateral	Sitting	Right	Relaxed	20.6	548	1.07	9.9	0.65	15	Fabio Valenti	000560	2024	1	2	4	Morning
7.32277e+18	2024-01-11 10:31:13	2			1976-02-02	Male	175	90	29.4	Right	FIRST TEST	Erector Spin	Lateral	Sitting	Right	Relaxed	20.4	554	1.1	9.8	0.64	15	Fabio Valenti	000560	2024	1	2	4	Morning
7.32277e+18	2024-01-11 10:31:13	3			1976-02-02	Male	175	90	29.4	Right	FIRST TEST	Erector Spin	Lateral	Sitting	Right	Relaxed	20.3	560	1.05	9.8	0.64	15	Fabio Valenti	000560	2024	1	2	4	Morning
7.32277e+18	2024-01-11 10:31:14	4			1976-02-02	Male	175	90	29.4	Right	FIRST TEST	Erector Spin	Lateral	Sitting	Right	Relaxed	20.3	560	1.03	9.8	0.64	15	Fabio Valenti	000560	2024	1	2	4	Morning
7.32277e+18	2024-01-11 10:31:15	5			1976-02-02	Male	175	90	29.4	Right	FIRST TEST	Erector Spin	Lateral	Sitting	Right	Relaxed	20.3	561	1.02	9.8	0.64	15	Fabio Valenti	000560	2024	1	2	4	Morning
7.32278e+18	2024-01-11 11:01:16	1			1976-02-02	Male	175	90	29.4	Right	SECOND TESTING 30 min	Erector Spin	Lateral	Lying	Left	Relaxed	16.4	332	1.62	16.9	1.05	15	Fabio Valenti	000560	2024	1	2	4	Morning
7.32278e+18	2024-01-11 11:01:17	2			1976-02-02	Male	175	90	29.4	Right	SECOND TESTING 30 min	Erector Spin	Lateral	Lying	Left	Relaxed	15.9	338	1.67	17	1.06	15	Fabio Valenti	000560	2024	1	2	4	Morning
7.32278e+18	2024-01-11 11:01:18	3			1976-02-02	Male	175	90	29.4	Right	SECOND TESTING 30 min	Erector Spin	Lateral	Lying	Left	Relaxed	15.9	343	1.65	16.7	1.04	15	Fabio Valenti	000560	2024	1	2	4	Morning
7.32278e+18	2024-01-11 11:01:19	4			1976-02-02	Male	175	90	29.4	Right	SECOND TESTING 30 min	Erector Spin	Lateral	Lying	Left	Relaxed	15.9	345	1.6	16.8	1.05	15	Fabio Valenti	000560	2024	1	2	4	Morning
7.32278e+18	2024-01-11 11:01:19	5			1976-02-02	Male	175	90	29.4	Right	SECOND TESTING 30 min	Erector Spin	Lateral	Lying	Left	Relaxed	15.9	350	1.61	16.5	1.03	15	Fabio Valenti	000560	2024	1	2	4	Morning
7.32278e+18	2024-01-11 11:01:29	1			1976-02-02	Male	175	90	29.4	Right	SECOND TESTING 30 min	Erector Spin	Lateral	Lying	Right	Relaxed	14.1	262	1.36	21.3	1.3	15	Fabio Valenti	000560	2024	1	2	4	Morning
7.32278e+18	2024-01-11 11:01:29	2			1976-02-02	Male	175	90	29.4	Right	SECOND TESTING 30 min	Erector Spin	Lateral	Lying	Right	Relaxed	14.1	264	1.33	21.1	1.29	15	Fabio Valenti	000560	2024	1	2	4	Morning
7.32278e+18	2024-01-11 11:01:30	3			1976-02-02	Male	175	90	29.4	Right	SECOND TESTING 30 min	Erector Spin	Lateral	Lying	Right	Relaxed	14	262	1.31	21.3	1.31	15	Fabio Valenti	000560	2024	1	2	4	Morning
7.32278e+18	2024-01-11 11:01:31	4			1976-02-02	Male	175	90	29.4	Right	SECOND TESTING 30 min	Erector Spin	Lateral	Lying	Right	Relaxed	14	265	1.32	21.1	1.3	15	Fabio Valenti	000560	2024	1	2	4	Morning
7.32278e+18	2024-01-11 11:01:31	5			1976-02-02	Male	175	90	29.4	Right	SECOND TESTING 30 min	Erector Spin	Lateral	Lying	Right	Relaxed	14	265	1.33	21	1.29	15	Fabio Valenti	000560	2024	1	2	4	Morning
7.32278e+18	2024-01-11 11:01:57	1			1976-02-02	Male	175	90	29.4	Right	SECOND TESTING 30 min	Erector Spin	Lateral	Sitting	Left	Relaxed	21.6	561	1.02	9.9	0.64	15	Fabio Valenti	000560	2024	1	2	4	Morning
7.32278e+18	2024-01-11 11:01:58	2			1976-02-02	Male	175	90	29.4	Right	SECOND TESTING 30 min	Erector Spin	Lateral	Sitting	Left	Relaxed	21.5	565	1.01	10	0.65	15	Fabio Valenti	000560	2024	1	2	4	Morning
7.32278e+18	2024-01-11 11:01:59	3			1976-02-02	Male	175	90	29.4	Right	SECOND TESTING 30 min	Erector Spin	Lateral	Sitting	Left	Relaxed	21.4	565	0.98	10	0.65	15	Fabio Valenti	000560	2024	1	2	4	Morning
7.32278e+18	2024-01-11 11:02:00	4			1976-02-02	Male	175	90	29.4	Right	SECOND TESTING 30 min	Erector Spin	Lateral	Sitting	Left	Relaxed	21.4	566	0.96	9.8	0.64	15	Fabio Valenti	000560	2024	1	2	4	Morning
7.32278e+18	2024-01-11 11:02:00	5			1976-02-02	Male	175	90	29.4	Right	SECOND TESTING 30 min	Erector Spin	Lateral	Sitting	Left	Relaxed	21.4	570	0.97	9.8	0.64	15	Fabio Valenti	000560	2024	1	2	4	Morning
7.32278e+18	2024-01-11 11:02:30	1			1976-02-02	Male	175	90	29.4	Right	SECOND TESTING 30 min	Erector Spin	Lateral	Sitting	Right	Relaxed	22.8	594	0.95	9.3	0.6	15	Fabio Valenti	000560	2024	1	2	4	Morning
7.32278e+18	2024-01-11 11:02:31	2			1976-02-02	Male	175	90	29.4	Right	SECOND TESTING 30 min	Erector Spin	Lateral	Sitting	Right	Relaxed	22.4	585	0.9	9.4	0.61	15	Fabio Valenti	000560	2024	1	2	4	Morning
7.32278e+18	2024-01-11 11:02:31	3			1976-02-02	Male	175	90	29.4	Right	SECOND TESTING 30 min	Erector Spin	Lateral	Sitting	Right	Relaxed	22.4	579	0.92	9.6	0.63	15	Fabio Valenti	000560	2024	1	2	4	Morning
7.32278e+18	2024-01-11 11:02:32	4			1976-02-02	Male	175	90	29.4	Right	SECOND TESTING 30 min	Erector Spin	Lateral	Sitting	Right	Relaxed	22.4	584	0.89	9.5	0.62	15	Fabio Valenti	000560	2024	1	2	4	Morning
7.32278e+18	2024-01-11 11:02:33	5			1976-02-02	Male	175	90	29.4	Right	SECOND TESTING 30 min	Erector Spin	Lateral	Sitting	Right	Relaxed	22.4	581	0.89	9.5	0.62	15	Fabio Valenti	000560	2024	1	2	4	Morning
7.32314e+18	2024-01-12 10:36:40	1			1976-02-02	Male	175	90	29.4	Right	THIRD TEST 24h	Erector Spin	Lateral	Lying	Left	Relaxed	18.3	398	1.64	14.2	0.9	15	Fabio Valenti	000560	2024	1	2	5	Morning
7.32314e+18	2024-01-12 10:36:40	2			1976-02-02	Male	175	90	29.4	Right	THIRD TEST 24h	Erector Spin	Lateral	Lying	Left	Relaxed	18.3	406	1.6	14	0.9	15	Fabio Valenti	000560	2024	1	2	5	Morning
7.32314e+18	2024-01-12 10:36:41	3			1976-02-02	Male	175	90	29.4	Right	THIRD TEST 24h	Erector Spin	Lateral	Lying	Left	Relaxed	18.3	408	1.56	14	0.9	15	Fabio Valenti	000560	2024	1	2	5	Morning
7.32314e+18	2024-01-12 10:36:42	4			1976-02-02	Male	175	90	29.4	Right	THIRD TEST 24h	Erector Spin	Lateral	Lying	Left	Relaxed	18.3	412	1.54	13.8	0.88	15	Fabio Valenti	000560	2024	1	2	5	Morning
7.32314e+18	2024-01-12 10:36:42	5			1976-02-02	Male	175	90	29.4	Right	THIRD TEST 24h	Erector Spin	Lateral	Lying	Left	Relaxed	18.3	414	1.53	13.8	0.88	15	Fabio Valenti	000560	2024	1	2	5	Morning
7.32314e+18	2024-01-12 10:36:50	1			1976-02-02	Male	175	90	29.4	Right	THIRD TEST 24h	Erector Spin	Lateral	Lying	Right	Relaxed	17.8	374	1.56	15.1	0.96	15	Fabio Valenti	000560	2024	1	2	5	Morning
7.32314e+18	2024-01-12 10:36:50	2			1976-02-02	Male	175	90	29.4	Right	THIRD TEST 24h	Erector Spin	Lateral	Lying	Right	Relaxed	17.8	382	1.53	14.8	0.94	15	Fabio Valenti	000560	2024	1	2	5	Morning
7.32314e+18	2024-01-12 10:36:51	3			1976-02-02	Male	175	90	29.4	Right	THIRD TEST 24h	Erector Spin	Lateral	Lying	Right	Relaxed	17.9	390	1.53	14.8	0.94	15	Fabio Valenti	000560	2024	1	2	5	Morning
7.32314e+18	2024-01-12 10:36:52	4			1976-02-02	Male	175	90	29.4	Right	THIRD TEST 24h	Erector Spin	Lateral	Lying	Right	Relaxed	17.8	390	1.53	14.8	0.94	15	Fabio Valenti	000560	2024	1	2	5	Morning
7.32314e+18	2024-01-12 10:36:52	5			1976-02-02	Male	175	90	29.4	Right	THIRD TEST 24h	Erector Spin	Lateral	Lying	Right	Relaxed	17.7	390	1.53	14.8	0.94	15	Fabio Valenti	000560	2024	1	2	5	Morning
7.32314e+18	2024-01-12 10:37:19	1			1976-02-02	Male	175	90	29.4	Right	THIRD TEST 24h	Erector Spin	Lateral	Sitting	Left	Relaxed	23.6	658	1.01	8.2	0.55	15	Fabio Valenti	000560	2024	1	2	5	Morning
7.32314e+18	2024-01-12 10:37:19	2			1976-02-02	Male	175	90	29.4	Right	THIRD TEST 24h	Erector Spin	Lateral	Sitting	Left	Relaxed	23.2	665	0.98	8.1	0.55	15	Fabio Valenti	000560	2024	1	2	5	Morning
7.32314e+18	2024-01-12 10:37:20	3			1976-02-02	Male	175	90	29.4	Right	THIRD TEST 24h	Erector Spin	Lateral	Sitting	Left	Relaxed	23	667	0.97	8.3	0.56	15	Fabio Valenti	000560	2024	1	2	5	Morning
7.32314e+18	2024-01-12 10:37:21	4			1976-02-02	Male	175	90	29.4	Right	THIRD TEST 24h	Erector Spin	Lateral	Sitting	Left	Relaxed	22.8	664	0.96	8.3	0.56	15	Fabio Valenti	000560	2024	1	2	5	Morning
7.32314e+18	2024-01-12 10:37:21	5			1976-02-02	Male	175	90	29.4	Right	THIRD TEST 24h	Erector Spin	Lateral	Sitting	Left	Relaxed	22.8	661	0.98	8.4	0.57	15	Fabio Valenti	000560	2024	1	2	5	Morning
7.32314e+18	2024-01-12 10:37:29	1			1976-02-02	Male	175	90	29.4	Right	THIRD TEST 24h	Erector Spin	Lateral	Sitting	Right	Relaxed	22	578	0.98	9.5	0.63	15	Fabio Valenti	000560	2024	1	2	5	Morning
7.32314e+18	2024-01-12 10:37:30	2			1976-02-02	Male	175	90	29.4	Right	THIRD TEST 24h	Erector Spin	Lateral	Sitting	Right	Relaxed	21.7	587	0.93	9.5	0.63	15	Fabio Valenti	000560	2024	1	2	5	Morning
7.32314e+18	2024-01-12 10:37:31	3			1976-02-02	Male	175	90	29.4	Right	THIRD TEST 24h	Erector Spin	Lateral	Sitting	Right	Relaxed	21.5	587	0.92	9.5	0.63	15	Fabio Valenti	000560	2024	1	2	5	Morning
7.32314e+18	2024-01-12 10:37:31	4			1976-02-02	Male	175	90	29.4	Right	THIRD TEST 24h	Erector Spin	Lateral	Sitting	Right	Relaxed	21.3	586	0.92	9.6	0.64	15	Fabio Valenti	000560	2024	1	2	5	Morning
7.32314e+18	2024-01-12 10:37:32	5			1976-02-02	Male	175	90	29.4	Right	THIRD TEST 24h	Erector Spin	Lateral	Sitting	Right	Relaxed	21.6	593	0.91	9.3	0.62	15	Fabio Valenti	000560	2024	1	2	5	Morning
7.32277e+18	2024-01-11 10:10:30	1			2000-01-18	Female	160	55	21.5	Right	FIRST TEST	Erector Spin	Lateral	Lying	Left	Relaxed	14.3	277	1.03	17.3	1	15	Fabio Valenti	000560	2024	1	2	4	Morning
7.32277e+18	2024-01-11 10:10:31	2			2000-01-18	Female	160	55	21.5	Right	FIRST TEST	Erector Spin	Lateral	Lying	Left	Relaxed	14.2	274	1.02	17.4	1	15	Fabio Valenti	000560	2024	1	2	4	Morning
7.32277e+18	2024-01-11 10:10:32	3			2000-01-18	Female	160	55	21.5	Right	FIRST TEST	Erector Spin	Lateral	Lying	Left	Relaxed	14.2	276	1.01	17.2	0.99	15	Fabio Valenti	000560	2024	1	2	4	Morning
7.32277e+18	2024-01-11 10:10:33	4			2000-01-18	Female	160	55	21.5	Right	FIRST TEST	Erector Spin	Lateral	Lying	Left	Relaxed	14.1	273	1.02	17.3	0.98	15	Fabio Valenti	000560	2024	1	2	4	Morning
7.32277e+18	2024-01-11 10:10:33	5			2000-01-18	Female	160	55	21.5	Right	FIRST TEST	Erector Spin	Lateral	Lying	Left	Relaxed	14.2	277	1.01	17.2	0.98	15	Fabio Valenti	000560	2024	1	2	4	Morning
7.32277e+18	2024-01-11 10:10:50	1			2000-01-18	Female	160	55	21.5	Right	FIRST TEST	Erector Spin	Lateral	Lying	Right	Relaxed	14.2	249	1.09	19.4	1.12	15	Fabio Valenti	000560	2024	1	2	4	Morning
7.32277e+18	2024-01-11 10:10:50	2			2000-01-18	Female	160	55	21.5	Right	FIRST TEST	Erector Spin	Lateral	Lying	Right	Relaxed	14.1	242	1.08	19.4	1.1	15	Fabio Valenti	000560	2024	1	2	4	Morning
7.32277e+18	2024-01-11 10:10:51	3			2000-01-18	Female	160	55	21.5	Right	FIRST TEST	Erector Spin	Lateral	Lying	Right	Relaxed	14.1	245	1.05	19.1	1.09	15	Fabio Valenti	000560	2024	1	2	4	Morning
7.32277e+18	2024-01-11 10:10:52	4			2000-01-18	Female	160	55	21.5	Right	FIRST TEST	Erector Spin	Lateral	Lying	Right	Relaxed	14	239	1.05	19.1	1.08	15	Fabio Valenti	000560	2024	1	2	4	Morning
7.32277e+18	2024-01-11 10:10:54	5			2000-01-18	Female	160	55	21.5	Right	FIRST TEST	Erector Spin	Lateral	Lying	Right	Relaxed	14.4	257	1.09	18.3	1.04	15	Fabio Valenti	000560	2024	1	2	4	Morning
7.32277e+18	2024-01-11 10:11:29	1			2000-01-18	Female	160	55	21.5	Right	FIRST TEST	Erector Spin	Lateral	Sitting	Left	Relaxed	14.8	331	1	16	0.97	15	Fabio Valenti	000560	2024	1	2	4	Morning
7.32277e+18	2024-01-11 10:11:30	2			2000-01-18	Female	160	55	21.5	Right	FIRST TEST	Erector Spin	Lateral	Sitting	Left	Relaxed	14.7	338	1.02	15.8	0.96	15	Fabio Valenti	000560	2024	1	2	4	Morning
7.32277e+18	2024-01-11 10:11:31	3			2000-01-18	Female	160	55	21.5	Right	FIRST TEST	Erector Spin	Lateral	Sitting	Left	Relaxed	14.7	341	1.02	15.8	0.96	15	Fabio Valenti	000560	2024	1	2	4	Morning
7.32277e+18	2024-01-11 10:11:31	4			2000-01-18	Female	160	55	21.5	Right	FIRST TEST	Erector Spin	Lateral	Sitting	Left	Relaxed	14.7	343	1.02	15.7	0.96	15	Fabio Valenti	000560	2024	1	2	4	Morning
7.32277e+18	2024-01-11 10:11:32	5			2000-01-18	Female	160	55	21.5	Right	FIRST TEST	Erector Spin	Lateral	Sitting	Left	Relaxed	14.6	341	1.02	15.8	0.98	15	Fabio Valenti	000560	2024	1	2	4	Morning
7.32277e+18	2024-01-11 10:11:44	1			2000-01-18	Female	160	55	21.5	Right	FIRST TEST	Erector Spin	Lateral	Sitting	Right	Relaxed	15.5	352	1	15.8	0.97	15	Fabio Valenti	000560	2024	1	2	4	Morning
7.32277e+18	2024-01-11 10:11:45	2			2000-01-18	Female	160	55	21.5	Right	FIRST TEST	Erector Spin	Lateral	Sitting	Right	Relaxed	15.4	356	1	15.8	0.97	15	Fabio Valenti	000560	2024	1	2	4	Morning
7.32277e+18	2024-01-11 10:11:45	3			2000-01-18	Female	160	55	21.5	Right	FIRST TEST	Erector Spin	Lateral	Sitting	Right	Relaxed	15.4	358	1	15.6	0.96	15	Fabio Valenti	000560	2024	1	2	4	Morning
7.32277e+18	2024-01-11 10:11:46	4			2000-01-18	Female	160	55	21.5	Right	FIRST TEST	Erector Spin	Lateral	Sitting	Right	Relaxed	15.3	357	1.01	15.9	0.98	15	Fabio Valenti	000560	2024	1	2	4	Morning
7.32277e+18	2024-01-11 10:11:47	5			2000-01-18	Female	160	55	21.5	Right	FIRST TEST	Erector Spin	Lateral	Sitting	Right	Relaxed	15.2	358	1.02	15.8	0.97	15	Fabio Valenti	000560	2024	1	2	4	Morning
7.32278e+18	2024-01-11 10:53:52	1			2000-01-18	Female	160	55	21.5	Right	SECOND TESTING 30 min	Erector Spin	Lateral	Lying	Left	Relaxed	13.7	245	1.15	19.5	1.13	15	Fabio Valenti	000560	2024	1	2	4	Morning
7.32278e+18	2024-01-11 10:53:53	2			2000-01-18	Female	160	55	21.5	Right	SECOND TESTING 30 min	Erector Spin	Lateral	Lying	Left	Relaxed	13.7	248	1.12	19.2	1.1	15	Fabio Valenti	000560	2024	1	2	4	Morning
7.32278e+18	2024-01-11 10:53:53	3			2000-01-18	Female	160	55	21.5	Right	SECOND TESTING 30 min	Erector Spin	Lateral	Lying	Left	Relaxed	13.7	248	1.12	19.2	1.09	15	Fabio Valenti	000560	2024	1	2	4	Morning
7.32278e+18	2024-01-11 10:53:54	4			2000-01-18	Female	160	55	21.5	Right	SECOND TESTING 30 min	Erector Spin	Lateral	Lying	Left	Relaxed	13.7	247	1.1	19.2	1.09	15	Fabio Valenti	000560	2024	1	2	4	Morning
7.32278e+18	2024-01-11 10:53:55	5			2000-01-18	Female	160	55	21.5	Right	SECOND TESTING 30 min	Erector Spin	Lateral	Lying	Left	Relaxed	13.8	249	1.1	19.2	1.09	15	Fabio Valenti	000560	2024	1	2	4	Morning
7.32278e+18	2024-01-11 10:54:05	1			2000-01-18	Female	160	55	21.5	Right	SECOND TESTING 30 min	Erector Spin	Lateral	Lying	Right	Relaxed	13.6	230	1.15	21.6	1.25	15	Fabio Valenti	000560	2024	1	2	4	Morning
7.32278e+18	2024-01-11 10:54:06	2			2000-01-18	Female	160	55	21.5	Right	SECOND TESTING 30 min	Erector Spin	Lateral	Lying	Right	Relaxed	13.6	233	1.1	21.5	1.24	15	Fabio Valenti	000560	2024	1	2	4	Morning
7.32278e+18	2024-01-11 10:54:06	3			2000-01-18	Female	160	55	21.5	Right	SECOND TESTING 30 min	Erector Spin	Lateral	Lying	Right	Relaxed	13.6	233	1.09	21.6	1.25	15	Fabio Valenti	000560	2024	1	2	4	Morning
7.32278e+18	2024-01-11 10:54:07	4			2000-01-18	Female	160	55	21.5	Right	SECOND TESTING 30 min	Erector Spin	Lateral	Lying	Right	Relaxed	13.7	231	1.09	21.2	1.22	15	Fabio Valenti	000560	2024	1	2	4	Morning
7.32278e+18	2024-01-11 10:54:08	5			2000-01-18	Female	160	55	21.5	Right	SECOND TESTING 30 min	Erector Spin	Lateral	Lying	Right	Relaxed	13.7	232	1.1	21.3	1.23	15	Fabio Valenti	000560	2024	1	2	4	Morning
7.32278e+18	2024-01-11 10:54:29	1			2000-01-18	Female	160	55	21.5	Right	SECOND TESTING 30 min	Erector Spin	Lateral	Sitting	Left	Relaxed	15.5	356	1.01	15.3	0.94	15	Fabio Valenti	000560	2024	1	2	4	Morning
7.32278e+18	2024-01-11 10:54:30	2			2000-01-18	Female	160	55	21.5	Right	SECOND TESTING 30 min	Erector Spin	Lateral	Sitting	Left	Relaxed	15.4	363	1.04	15.2	0.94	15	Fabio Valenti	000560	2024	1	2	4	Morning
7.32278e+18	2024-01-11 10:54:31	3			2000-01-18	Female	160	55	21.5	Right	SECOND TESTING 30 min	Erector Spin	Lateral	Sitting	Left	Relaxed	15.4	365	1.02	15.2	0.94	15	Fabio Valenti	000560	2024	1	2	4	Morning
7.32278e+18	2024-01-11 10:54:31	4			2000-01-18	Female	160	55	21.5	Right	SECOND TESTING 30 min	Erector Spin	Lateral	Sitting	Left	Relaxed	15.4	366	1.02	15.3	0.95	15	Fabio Valenti	000560	2024	1	2	4	Morning
7.32278e+18	2024-01-11 10:54:32	5			2000-01-18	Female	160	55	21.5	Right	SECOND TESTING 30 min	Erector Spin	Lateral	Sitting	Left	Relaxed	15.4	366	1.02	15.3	0.94	15	Fabio Valenti	000560	2024	1	2	4	Morning
7.32278e+18	2024-01-11 10:54:44	1			2000-01-18	Female	160	55	21.5	Right	SECOND TESTING 30 min	Erector Spin	Lateral	Sitting	Right	Relaxed	15.8	378	1.17	14.7	0.92	15	Fabio Valenti	000560	2024	1	2	4	Morning
7.32278e+18	2024-01-11 10:54:44	2			2000-01-18	Female	160	55	21.5	Right	SECOND TESTING 30 min	Erector Spin	Lateral	Sitting	Right	Relaxed	15.7	386	1.18	14.7	0.93	15	Fabio Valenti	000560	2024	1	2	4	Morning
7.32278e+18	2024-01-11 10:54:45	3			2000-01-18	Female	160	55	21.5	Right	SECOND TESTING 30 min	Erector Spin	Lateral	Sitting	Right	Relaxed	15.7	387	1.15	14.7	0.93	15	Fabio Valenti	000560	2024	1	2	4	Morning
7.32278e+18	2024-01-11 10:54:46	4			2000-01-18	Female	160	55	21.5	Right	SECOND TESTING 30 min	Erector Spin	Lateral	Sitting	Right	Relaxed	15.6	387	1.13	14.7	0.92	15	Fabio Valenti	000560	2024	1	2	4	Morning
7.32278e+18	2024-01-11 10:54:46	5			2000-01-18	Female	160	55	21.5	Right	SECOND TESTING 30 min	Erector Spin	Lateral	Sitting	Right	Relaxed	15.6	385	1.11	14.9	0.94	15	Fabio Valenti	000560	2024	1	2	4	Morning
7.32314e+18	2024-01-12 10:10:48	1			2000-01-18	Female	160	55	21.5	Right	THIRD TEST 24h	Erector Spin	Lateral	Lying	Left	Relaxed	13.3	190	0.74	20	1.04	15	Fabio Valenti	000560	2024	1	2	5	Morning
7.32314e+18	2024-01-12 10:10:49	2			2000-01-18	Female	160	55	21.5	Right	THIRD TEST 24h	Erector Spin	Lateral	Lying	Left	Relaxed	13.4	194	0.74	20	1.05	15	Fabio Valenti	000560	2024	1	2	5	Morning
7.32314e+18	2024-01-12 10:10:50	3			2000-01-18	Female	160	55	21.5	Right	THIRD TEST 24h	Erector Spin	Lateral	Lying	Left	Relaxed	13.4	198	0.73	20.4	1.09	15	Fabio Valenti	000560	2024	1	2	5	Morning
7.32314e+18	2024-01-12 10:10:50	4			2000-01-18	Female	160	55	21.5	Right	THIRD TEST 24h	Erector Spin	Lateral	Lying	Left	Relaxed	13.4	196	0.72	19.7	1.03	15	Fabio Valenti	000560	2024	1	2	5	Morning
7.32314e+18	2024-01-12 10:10:51	5			2000-01-18	Female	160	55	21.5	Right	THIRD TEST 24h	Erector Spin	Lateral	Lying	Left	Relaxed	13.5	195	0.71	20	1.06	15	Fabio Valenti	000560	2024	1	2	5	Morning
7.32314e+18	2024-01-12 10:11:11	1			2000-01-18	Female	160	55	21.5	Right	THIRD TEST 24h	Erector Spin	Lateral	Lying	Right	Relaxed	15.5	260	1.08	18.4	1.09	15	Fabio Valenti	000560	2024	1	2	5	Morning
7.32314e+18	2024-01-12 10:11:12	2			2000-01-18	Female	160	55	21.5	Right	THIRD TEST 24h	Erector Spin	Lateral	Lying	Right	Relaxed	15.4	260	1.04	18.4	1.08	15	Fabio Valenti	000560	2024	1	2	5	Morning
7.32314e+18	2024-01-12 10:11:13	3			2000-01-18	Female	160	55	21.5	Right	THIRD TEST 24h	Erector Spin	Lateral	Lying	Right	Relaxed	15.5	256	1.01	18.2	1.07	15	Fabio Valenti	000560	2024	1	2	5	Morning
7.32314e+18	2024-01-12 10:11:13	4			2000-01-18	Female	160	55	21.5	Right	THIRD TEST 24h	Erector Spin	Lateral	Lying	Right	Relaxed	15.5	262	1.01	18.3	1.08	15	Fabio Valenti	000560	2024	1	2	5	Morning
7.32314e+18	2024-01-12 10:11:14	5			2000-01-18	Female	160	55	21.5	Right	THIRD TEST 24h	Erector Spin	Lateral	Lying	Right	Relaxed	15.5	258	1.01	18.2	1.07	15	Fabio Valenti	000560	2024	1	2	5	Morning
7.32314e+18	2024-01-12 10:11:43	1			2000-01-18	Female	160	55	21.5	Right	THIRD TEST 24h	Erector Spin	Lateral	Sitting	Left	Relaxed	16	405	1.01	13.7	0.86	15	Fabio Valenti	000560	2024	1	2	5	Morning
7.32314e+18	2024-01-12 10:11:44	2			2000-01-18	Female	160	55	21.5	Right	THIRD TEST 24h	Erector Spin	Lateral	Sitting	Left	Relaxed	15.5	401	1.01	14.1	0.88	15	Fabio Valenti	000560	2024	1	2	5	Morning
7.32314e+18	2024-01-12 10:11:45	3			2000-01-18	Female	160	55	21.5	Right	THIRD TEST 24h	Erector Spin	Lateral	Sitting	Left	Relaxed	15.4	400	1	14.1	0.88	15	Fabio Valenti	000560	2024	1	2	5	Morning
7.32314e+18	2024-01-12 10:11:46	4			2000-01-18	Female	160	55	21.5	Right	THIRD TEST 24h	Erector Spin	Lateral	Sitting	Left	Relaxed	15.4	401	1	14.3	0.9	15	Fabio Valenti	000560	2024	1	2	5	Morning
7.32314e+18	2024-01-12 10:11:46	5			2000-01-18	Female	160	55	21.5	Right	THIRD TEST 24h	Erector Spin	Lateral	Sitting	Left	Relaxed	15.4	396	0.99	14.4	0.9	15	Fabio Valenti	000560	2024	1	2	5	Morning
7.32314e+18	2024-01-12 10:11:55	1			2000-01-18	Female	160	55	21.5	Right	THIRD TEST 24h	Erector Spin	Lateral	Sitting	Right	Relaxed	14.1	302	1	17.8	1.08	15	Fabio Valenti	000560	2024	1	2	5	Morning
7.32314e+18	2024-01-12 10:11:56	2			2000-01-18	Female	160	55	21.5	Right	THIRD TEST 24h	Erector Spin	Lateral	Sitting	Right	Relaxed	14	303	0.98	17.8	1.08	15	Fabio Valenti	000560	2024	1	2	5	Morning
7.32314e+18	2024-01-12 10:11:56	3			2000-01-18	Female	160	55	21.5	Right	THIRD TEST 24h	Erector Spin	Lateral	Sitting	Right	Relaxed	13.9	302	0.97	18	1.09	15	Fabio Valenti	000560	2024	1	2	5	Morning
7.32314e+18	2024-01-12 10:11:57	4			2000-01-18	Female	160	55	21.5	Right	THIRD TEST 24h	Erector Spin	Lateral	Sitting	Right	Relaxed	13.9	303	0.97	18	1.09	15	Fabio Valenti	000560	2024	1	2	5	Morning
7.32314e+18	2024-01-12 10:11:58	5			2000-01-18	Female	160	55	21.5	Right	THIRD TEST 24h	Erector Spin	Lateral	Sitting	Right	Relaxed	13.9	301	0.95	18	1.08	15	Fabio Valenti	000560	2024	1	2	5	Morning
7.32277e+18	2024-01-11 10:35:40	1			1988-03-19	Female	175	85	27.8	Right	FIRST TEST	Erector Spin	Lateral	Lying	Left	Relaxed	14.1	257	1.58	21.6	1.31	15	Fabio Valenti	000560	2024	1	2	4	Morning
7.32277e+18	2024-01-11 10:35:41	2			1988-03-19	Female	175	85	27.8	Right	FIRST TEST	Erector Spin	Lateral	Lying	Left	Relaxed	14.2	261	1.58	21.4	1.3	15	Fabio Valenti	000560	2024	1	2	4	Morning
7.32277e+18	2024-01-11 10:35:41	3			1988-03-19	Female	175	85	27.8	Right	FIRST TEST	Erector Spin	Lateral	Lying	Left	Relaxed	14.1	258	1.57	21.8	1.33	15	Fabio Valenti	000560	2024	1	2	4	Morning
7.32277e+18	2024-01-11 10:35:42	4			1988-03-19	Female	175	85	27.8	Right	FIRST TEST	Erector Spin	Lateral	Lying	Left	Relaxed	14.1	268	1.55	21.6	1.32	15	Fabio Valenti	000560	2024	1	2	4	Morning
7.32277e+18	2024-01-11 10:35:43	5			1988-03-19	Female	175	85	27.8	Right	FIRST TEST	Erector Spin	Lateral	Lying	Left	Relaxed	14.1	265	1.55	21.7	1.33	15	Fabio Valenti	000560	2024	1	2	4	Morning
7.32277e+18	2024-01-11 10:35:51	1			1988-03-19	Female	175	85	27.8	Right	FIRST TEST	Erector Spin	Lateral	Lying	Right	Relaxed	15.5	263	1.13	19	1.13	15	Fabio Valenti	000560	2024	1	2	4	Morning
7.32277e+18	2024-01-11 10:35:51	2			1988-03-19	Female	175	85	27.8	Right	FIRST TEST	Erector Spin	Lateral	Lying	Right	Relaxed	15.4	273	1.1	18.9	1.14	15	Fabio Valenti	000560	2024	1	2	4	Morning
7.32277e+18	2024-01-11 10:35:52	3			1988-03-19	Female	175	85	27.8	Right	FIRST TEST	Erector Spin	Lateral	Lying	Right	Relaxed	15.4	273	1.08	18.9	1.14	15	Fabio Valenti	000560	2024	1	2	4	Morning
7.32277e+18	2024-01-11 10:35:53	4			1988-03-19	Female	175	85	27.8	Right	FIRST TEST	Erector Spin	Lateral	Lying	Right	Relaxed	15.4	273	1.07	18.8	1.13	15	Fabio Valenti	000560	2024	1	2	4	Morning
7.32277e+18	2024-01-11 10:35:53	5			1988-03-19	Female	175	85	27.8	Right	FIRST TEST	Erector Spin	Lateral	Lying	Right	Relaxed	15.5	275	1.08	18.6	1.12	15	Fabio Valenti	000560	2024	1	2	4	Morning
7.32277e+18	2024-01-11 10:36:12	1			1988-03-19	Female	175	85	27.8	Right	FIRST TEST	Erector Spin	Lateral	Sitting	Left	Relaxed	13.9	265	0.98	18.5	1.08	15	Fabio Valenti	000560	2024	1	2	4	Morning
7.32277e+18	2024-01-11 10:36:12	2			1988-03-19	Female	175	85	27.8	Right	FIRST TEST	Erector Spin	Lateral	Sitting	Left	Relaxed	13.7	264	0.97	18.6	1.08	15	Fabio Valenti	000560	2024	1	2	4	Morning
7.32277e+18	2024-01-11 10:36:13	3			1988-03-19	Female	175	85	27.8	Right	FIRST TEST	Erector Spin	Lateral	Sitting	Left	Relaxed	13.6	256	0.95	18.7	1.07	15	Fabio Valenti	000560	2024	1	2	4	Morning
7.32277e+18	2024-01-11 10:36:14	4			1988-03-19	Female	175	85	27.8	Right	FIRST TEST	Erector Spin	Lateral	Sitting	Left	Relaxed	13.5	253	0.96	18.5	1.05	15	Fabio Valenti	000560	2024	1	2	4	Morning
7.32277e+18	2024-01-11 10:36:15	5			1988-03-19	Female	175	85	27.8	Right	FIRST TEST	Erector Spin	Lateral	Sitting	Left	Relaxed	13.4	249	0.97	18.5	1.03	15	Fabio Valenti	000560	2024	1	2	4	Morning
7.32277e+18	2024-01-11 10:36:37	1			1988-03-19	Female	175	85	27.8	Right	FIRST TEST	Erector Spin	Lateral	Sitting	Right	Relaxed	15.1	336	1.03	16.1	0.97	15	Fabio Valenti	000560	2024	1	2	4	Morning
7.32277e+18	2024-01-11 10:36:38	2			1988-03-19	Female	175	85	27.8	Right	FIRST TEST	Erector Spin	Lateral	Sitting	Right	Relaxed	15	338	1	16.2	0.97	15	Fabio Valenti	000560	2024	1	2	4	Morning
7.32277e+18	2024-01-11 10:36:39	3			1988-03-19	Female	175	85	27.8	Right	FIRST TEST	Erector Spin	Lateral	Sitting	Right	Relaxed	15	342	1	15.9	0.96	15	Fabio Valenti	000560	2024	1	2	4	Morning
7.32277e+18	2024-01-11 10:36:39	4			1988-03-19	Female	175	85	27.8	Right	FIRST TEST	Erector Spin	Lateral	Sitting	Right	Relaxed	15.1	347	1	16	0.97	15	Fabio Valenti	000560	2024	1	2	4	Morning
7.32277e+18	2024-01-11 10:36:40	5			1988-03-19	Female	175	85	27.8	Right	FIRST TEST	Erector Spin	Lateral	Sitting	Right	Relaxed	15.1	347	0.99	15.9	0.96	15	Fabio Valenti	000560	2024	1	2	4	Morning
7.32278e+18	2024-01-11 11:04:07	1			1988-03-19	Female	175	85	27.8	Right	SECOND TESTING 30 min	Erector Spin	Lateral	Lying	Left	Relaxed	14.6	261	1.56	21.1	1.29	15	Fabio Valenti	000560	2024	1	2	4	Morning
7.32278e+18	2024-01-11 11:04:08	2			1988-03-19	Female	175	85	27.8	Right	SECOND TESTING 30 min	Erector Spin	Lateral	Lying	Left	Relaxed	14.6	263	1.55	21.1	1.29	15	Fabio Valenti	000560	2024	1	2	4	Morning
7.32278e+18	2024-01-11 11:04:09	3			1988-03-19	Female	175	85	27.8	Right	SECOND TESTING 30 min	Erector Spin	Lateral	Lying	Left	Relaxed	14.6	265	1.53	21.1	1.3	15	Fabio Valenti	000560	2024	1	2	4	Morning
7.32278e+18	2024-01-11 11:04:10	4			1988-03-19	Female	175	85	27.8	Right	SECOND TESTING 30 min	Erector Spin	Lateral	Lying	Left	Relaxed	14.5	266	1.51	20.8	1.28	15	Fabio Valenti	000560	2024	1	2	4	Morning
7.32278e+18	2024-01-11 11:04:10	5			1988-03-19	Female	175	85	27.8	Right	SECOND TESTING 30 min	Erector Spin	Lateral	Lying	Left	Relaxed	14.7	267	1.5	20.8	1.28	15	Fabio Valenti	000560	2024	1	2	4	Morning
7.32278e+18	2024-01-11 11:04:18	1			1988-03-19	Female	175	85	27.8	Right	SECOND TESTING 30 min	Erector Spin	Lateral	Lying	Right	Relaxed	13.3	227	1.27	23.9	1.44	15	Fabio Valenti	000560	2024	1	2	4	Morning
7.32278e+18	2024-01-11 11:04:19	2			1988-03-19	Female	175	85	27.8	Right	SECOND TESTING 30 min	Erector Spin	Lateral	Lying	Right	Relaxed	13.2	225	1.22	24	1.44	15	Fabio Valenti	000560	2024	1	2	4	Morning
7.32278e+18	2024-01-11 11:04:19	3			1988-03-19	Female	175	85	27.8	Right	SECOND TESTING 30 min	Erector Spin	Lateral	Lying	Right	Relaxed	13.1	226	1.2	23.9	1.43	15	Fabio Valenti	000560	2024	1	2	4	Morning
7.32278e+18	2024-01-11 11:04:20	4			1988-03-19	Female	175	85	27.8	Right	SECOND TESTING 30 min	Erector Spin	Lateral	Lying	Right	Relaxed	13.1	220	1.2	23.8	1.42	15	Fabio Valenti	000560	2024	1	2	4	Morning
7.32278e+18	2024-01-11 11:04:21	5			1988-03-19	Female	175	85	27.8	Right	SECOND TESTING 30 min	Erector Spin	Lateral	Lying	Right	Relaxed	13.1	224	1.19	24.2	1.46	15	Fabio Valenti	000560	2024	1	2	4	Morning
7.32278e+18	2024-01-11 11:04:55	1			1988-03-19	Female	175	85	27.8	Right	SECOND TESTING 30 min	Erector Spin	Lateral	Sitting	Left	Relaxed	11.8	164	0.77	22.3	1.12	15	Fabio Valenti	000560	2024	1	2	4	Morning
7.32278e+18	2024-01-11 11:04:56	2			1988-03-19	Female	175	85	27.8	Right	SECOND TESTING 30 min	Erector Spin	Lateral	Sitting	Left	Relaxed	11.8	162	0.74	22.3	1.11	15	Fabio Valenti	000560	2024	1	2	4	Morning
7.32278e+18	2024-01-11 11:04:56	3			1988-03-19	Female	175	85	27.8	Right	SECOND TESTING 30 min	Erector Spin	Lateral	Sitting	Left	Relaxed	11.8	162	0.75	22	1.09	15	Fabio Valenti	000560	2024	1	2	4	Morning
7.32278e+18	2024-01-11 11:04:57	4			1988-03-19	Female	175	85	27.8	Right	SECOND TESTING 30 min	Erector Spin	Lateral	Sitting	Left	Relaxed	11.8	161	0.75	22.1	1.09	15	Fabio Valenti	000560	2024	1	2	4	Morning
7.32278e+18	2024-01-11 11:04:58	5			1988-03-19	Female	175	85	27.8	Right	SECOND TESTING 30 min	Erector Spin	Lateral	Sitting	Left	Relaxed	11.7	166	0.75	22.3	1.12	15	Fabio Valenti	000560	2024	1	2	4	Morning
7.32278e+18	2024-01-11 11:05:19	1			1988-03-19	Female	175	85	27.8	Right	SECOND TESTING 30 min	Erector Spin	Lateral	Sitting	Right	Relaxed	14.2	296	0.93	16.6	0.97	15	Fabio Valenti	000560	2024	1	2	4	Morning
7.32278e+18	2024-01-11 11:05:20	2			1988-03-19	Female	175	85	27.8	Right	SECOND TESTING 30 min	Erector Spin	Lateral	Sitting	Right	Relaxed	14.1	295	0.91	16.4	0.94	15	Fabio Valenti	000560	2024	1	2	4	Morning
7.32278e+18	2024-01-11 11:05:21	3			1988-03-19	Female	175	85	27.8	Right	SECOND TESTING 30 min	Erector Spin	Lateral	Sitting	Right	Relaxed	14.1	295	0.89	16.4	0.94	15	Fabio Valenti	000560	2024	1	2	4	Morning
7.32278e+18	2024-01-11 11:05:21	4			1988-03-19	Female	175	85	27.8	Right	SECOND TESTING 30 min	Erector Spin	Lateral	Sitting	Right	Relaxed	14.1	297	0.88	16.3	0.93	15	Fabio Valenti	000560	2024	1	2	4	Morning
7.32278e+18	2024-01-11 11:05:22	5			1988-03-19	Female	175	85	27.8	Right	SECOND TESTING 30 min	Erector Spin	Lateral	Sitting	Right	Relaxed	14.1	298	0.88	16.3	0.94	15	Fabio Valenti	000560	2024	1	2	4	Morning
7.32315e+18	2024-01-12 10:59:02	1			1988-03-19	Female	175	85	27.8	Right	THIRD TEST 24h	Erector Spin	Lateral	Lying	Left	Relaxed	13.7	239	1.42	22.4	1.36	15	Fabio Valenti	000560	2024	1	2	5	Morning
7.32315e+18	2024-01-12 10:59:03	2			1988-03-19	Female	175	85	27.8	Right	THIRD TEST 24h	Erector Spin	Lateral	Lying	Left	Relaxed	13.7	247	1.4	22.4	1.37	15	Fabio Valenti	000560	2024	1	2	5	Morning
7.32315e+18	2024-01-12 10:59:04	3			1988-03-19	Female	175	85	27.8	Right	THIRD TEST 24h	Erector Spin	Lateral	Lying	Left	Relaxed	13.8	247	1.39	22.3	1.37	15	Fabio Valenti	000560	2024	1	2	5	Morning
7.32315e+18	2024-01-12 10:59:05	4			1988-03-19	Female	175	85	27.8	Right	THIRD TEST 24h	Erector Spin	Lateral	Lying	Left	Relaxed	13.8	249	1.39	22.2	1.36	15	Fabio Valenti	000560	2024	1	2	5	Morning
7.32315e+18	2024-01-12 10:59:05	5			1988-03-19	Female	175	85	27.8	Right	THIRD TEST 24h	Erector Spin	Lateral	Lying	Left	Relaxed	13.8	250	1.39	22.2	1.36	15	Fabio Valenti	000560	2024	1	2	5	Morning
7.32315e+18	2024-01-12 10:59:13	1			1988-03-19	Female	175	85	27.8	Right	THIRD TEST 24h	Erector Spin	Lateral	Lying	Right	Relaxed	14.9	266	1.45	20.2	1.24	15	Fabio Valenti	000560	2024	1	2	5	Morning
7.32315e+18	2024-01-12 10:59:14	2			1988-03-19	Female	175	85	27.8	Right	THIRD TEST 24h	Erector Spin	Lateral	Lying	Right	Relaxed	14.8	267	1.46	20.1	1.24	15	Fabio Valenti	000560	2024	1	2	5	Morning
7.32315e+18	2024-01-12 10:59:15	3			1988-03-19	Female	175	85	27.8	Right	THIRD TEST 24h	Erector Spin	Lateral	Lying	Right	Relaxed	15	271	1.43	19.9	1.23	15	Fabio Valenti	000560	2024	1	2	5	Morning
7.32315e+18	2024-01-12 10:59:15	4			1988-03-19	Female	175	85	27.8	Right	THIRD TEST 24h	Erector Spin	Lateral	Lying	Right	Relaxed	15.3	275	1.43	19.6	1.21	15	Fabio Valenti	000560	2024	1	2	5	Morning
7.32315e+18	2024-01-12 10:59:16	5			1988-03-19	Female	175	85	27.8	Right	THIRD TEST 24h	Erector Spin	Lateral	Lying	Right	Relaxed	15.1	279	1.44	19.6	1.21	15	Fabio Valenti	000560	2024	1	2	5	Morning
7.32315e+18	2024-01-12 10:59:30	1			1988-03-19	Female	175	85	27.8	Right	THIRD TEST 24h	Erector Spin	Lateral	Sitting	Left	Relaxed	12.2	212	1.13	22.4	1.29	15	Fabio Valenti	000560	2024	1	2	5	Morning
7.32315e+18	2024-01-12 10:59:31	2			1988-03-19	Female	175	85	27.8	Right	THIRD TEST 24h	Erector Spin	Lateral	Sitting	Left	Relaxed	12.2	211	1.08	22.3	1.28	15	Fabio Valenti	000560	2024	1	2	5	Morning
7.32315e+18	2024-01-12 10:59:31	3			1988-03-19	Female	175	85	27.8	Right	THIRD TEST 24h	Erector Spin	Lateral	Sitting	Left	Relaxed	12	211	1.09	22.3	1.27	15	Fabio Valenti	000560	2024	1	2	5	Morning
7.32315e+18	2024-01-12 10:59:32	4			1988-03-19	Female	175	85	27.8	Right	THIRD TEST 24h	Erector Spin	Lateral	Sitting	Left	Relaxed	12	205	1.07	22.4	1.27	15	Fabio Valenti	000560	2024	1	2	5	Morning
7.32315e+18	2024-01-12 10:59:33	5			1988-03-19	Female	175	85	27.8	Right	THIRD TEST 24h	Erector Spin	Lateral	Sitting	Left	Relaxed	12.1	202	1.05	22.4	1.26	15	Fabio Valenti	000560	2024	1	2	5	Morning
7.32315e+18	2024-01-12 10:59:40	1			1988-03-19	Female	175	85	27.8	Right	THIRD TEST 24h	Erector Spin	Lateral	Sitting	Right	Relaxed	13.2	252	1.06	19.3	1.13	15	Fabio Valenti	000560	2024	1	2	5	Morning
7.32315e+18	2024-01-12 10:59:41	2			1988-03-19	Female	175	85	27.8	Right	THIRD TEST 24h	Erector Spin	Lateral	Sitting	Right	Relaxed	13	249	1.02	19.4	1.12	15	Fabio Valenti	000560	2024	1	2	5	Morning
7.32315e+18	2024-01-12 10:59:42	3			1988-03-19	Female	175	85	27.8	Right	THIRD TEST 24h	Erector Spin	Lateral	Sitting	Right	Relaxed	13	241	0.99	19.5	1.13	15	Fabio Valenti	000560	2024	1	2	5	Morning
7.32315e+18	2024-01-12 10:59:44	4			1988-03-19	Female	175	85	27.8	Right	THIRD TEST 24h	Erector Spin	Lateral	Sitting	Right	Relaxed	13	249	1.02	19.3	1.12	15	Fabio Valenti	000560	2024	1	2	5	Morning
7.32315e+18	2024-01-12 10:59:44	5			1988-03-19	Female	175	85	27.8	Right	THIRD TEST 24h	Erector Spin	Lateral	Sitting	Right	Relaxed	13	250	1.02	19.2	1.11	15	Fabio Valenti	000560	2024	1	2	5	Morning
7.33024e+18	2024-01-31 13:29:10	1			1979-07-18	Male	187	78	22.3	Left	FIRST TEST	Erector Spin	Lateral	Lying	Left	Relaxed	19.2	440	1.27	12.4	0.79	15	Fabio Valenti	000560	2024	1	5	3	Day
7.33024e+18	2024-01-31 13:29:11	2			1979-07-18	Male	187	78	22.3	Left	FIRST TEST	Erector Spin	Lateral	Lying	Left	Relaxed	19.3	444	1.23	12.4	0.79	15	Fabio Valenti	000560	2024	1	5	3	Day
7.33024e+18	2024-01-31 13:29:11	3			1979-07-18	Male	187	78	22.3	Left	FIRST TEST	Erector Spin	Lateral	Lying	Left	Relaxed	19.4	447	1.21	12.4	0.79	15	Fabio Valenti	000560	2024	1	5	3	Day
7.33024e+18	2024-01-31 13:29:12	4			1979-07-18	Male	187	78	22.3	Left	FIRST TEST	Erector Spin	Lateral	Lying	Left	Relaxed	19.5	448	1.2	12.3	0.78	15	Fabio Valenti	000560	2024	1	5	3	Day
7.33024e+18	2024-01-31 13:29:13	5			1979-07-18	Male	187	78	22.3	Left	FIRST TEST	Erector Spin	Lateral	Lying	Left	Relaxed	19.6	451	1.19	12.2	0.78	15	Fabio Valenti	000560	2024	1	5	3	Day
7.33024e+18	2024-01-31 13:29:21	1			1979-07-18	Male	187	78	22.3	Left	FIRST TEST	Erector Spin	Lateral	Lying	Right	Relaxed	18.3	442	1.69	12.8	0.82	15	Fabio Valenti	000560	2024	1	5	3	Day
7.33024e+18	2024-01-31 13:29:22	2			1979-07-18	Male	187	78	22.3	Left	FIRST TEST	Erector Spin	Lateral	Lying	Right	Relaxed	18.1	442	1.66	12.8	0.82	15	Fabio Valenti	000560	2024	1	5	3	Day
7.33024e+18	2024-01-31 13:29:22	3			1979-07-18	Male	187	78	22.3	Left	FIRST TEST	Erector Spin	Lateral	Lying	Right	Relaxed	18.1	445	1.67	12.7	0.81	15	Fabio Valenti	000560	2024	1	5	3	Day
7.33024e+18	2024-01-31 13:29:23	4			1979-07-18	Male	187	78	22.3	Left	FIRST TEST	Erector Spin	Lateral	Lying	Right	Relaxed	18.2	447	1.64	12.6	0.81	15	Fabio Valenti	000560	2024	1	5	3	Day
7.33024e+18	2024-01-31 13:29:24	5			1979-07-18	Male	187	78	22.3	Left	FIRST TEST	Erector Spin	Lateral	Lying	Right	Relaxed	18.1	447	1.65	12.6	0.81	15	Fabio Valenti	000560	2024	1	5	3	Day
7.33024e+18	2024-01-31 13:30:27	1			1979-07-18	Male	187	78	22.3	Left	FIRST TEST	Erector Spin	Lateral	Sitting	Left	Relaxed	25.4	687	0.64	7.6	0.5	15	Fabio Valenti	000560	2024	1	5	3	Day
7.33024e+18	2024-01-31 13:30:28	2			1979-07-18	Male	187	78	22.3	Left	FIRST TEST	Erector Spin	Lateral	Sitting	Left	Relaxed	25.8	700	0.65	7.4	0.49	15	Fabio Valenti	000560	2024	1	5	3	Day
7.33024e+18	2024-01-31 13:30:28	3			1979-07-18	Male	187	78	22.3	Left	FIRST TEST	Erector Spin	Lateral	Sitting	Left	Relaxed	25.8	709	0.63	7.4	0.49	15	Fabio Valenti	000560	2024	1	5	3	Day
7.33024e+18	2024-01-31 13:30:29	4			1979-07-18	Male	187	78	22.3	Left	FIRST TEST	Erector Spin	Lateral	Sitting	Left	Relaxed	25.9	710	0.63	7.4	0.49	15	Fabio Valenti	000560	2024	1	5	3	Day
7.33024e+18	2024-01-31 13:30:30	5			1979-07-18	Male	187	78	22.3	Left	FIRST TEST	Erector Spin	Lateral	Sitting	Left	Relaxed	26	711	0.62	7.3	0.48	15	Fabio Valenti	000560	2024	1	5	3	Day
7.33024e+18	2024-01-31 13:30:47	1			1979-07-18	Male	187	78	22.3	Left	FIRST TEST	Erector Spin	Lateral	Sitting	Right	Relaxed	33.9	871	0.68	5.1	0.35	15	Fabio Valenti	000560	2024	1	5	3	Day
7.33024e+18	2024-01-31 13:30:48	2			1979-07-18	Male	187	78	22.3	Left	FIRST TEST	Erector Spin	Lateral	Sitting	Right	Relaxed	34.1	880	0.64	5	0.35	15	Fabio Valenti	000560	2024	1	5	3	Day
7.33024e+18	2024-01-31 13:30:48	3			1979-07-18	Male	187	78	22.3	Left	FIRST TEST	Erector Spin	Lateral	Sitting	Right	Relaxed	34.2	875	0.64	5	0.35	15	Fabio Valenti	000560	2024	1	5	3	Day
7.33024e+18	2024-01-31 13:30:49	4			1979-07-18	Male	187	78	22.3	Left	FIRST TEST	Erector Spin	Lateral	Sitting	Right	Relaxed	34.1	883	0.63	5.1	0.36	15	Fabio Valenti	000560	2024	1	5	3	Day
7.33024e+18	2024-01-31 13:30:53	5			1979-07-18	Male	187	78	22.3	Left	FIRST TEST	Erector Spin	Lateral	Sitting	Right	Relaxed	33.9	880	0.64	5.1	0.35	15	Fabio Valenti	000560	2024	1	5	3	Day
7.33025e+18	2024-01-31 13:59:01	1			1979-07-18	Male	187	78	22.3	Left	SECOND TESTING 30 min	Erector Spin	Lateral	Lying	Left	Relaxed	22.5	447	2.04	12.7	0.82	15	Fabio Valenti	000560	2024	1	5	3	Day
7.33025e+18	2024-01-31 13:59:02	2			1979-07-18	Male	187	78	22.3	Left	SECOND TESTING 30 min	Erector Spin	Lateral	Lying	Left	Relaxed	22.7	449	2.11	12.5	0.82	15	Fabio Valenti	000560	2024	1	5	3	Day
7.33025e+18	2024-01-31 13:59:03	3			1979-07-18	Male	187	78	22.3	Left	SECOND TESTING 30 min	Erector Spin	Lateral	Lying	Left	Relaxed	23	456	2	12.4	0.81	15	Fabio Valenti	000560	2024	1	5	3	Day
7.33025e+18	2024-01-31 13:59:03	4			1979-07-18	Male	187	78	22.3	Left	SECOND TESTING 30 min	Erector Spin	Lateral	Lying	Left	Relaxed	22.8	457	2.01	12.4	0.81	15	Fabio Valenti	000560	2024	1	5	3	Day
7.33025e+18	2024-01-31 13:59:04	5			1979-07-18	Male	187	78	22.3	Left	SECOND TESTING 30 min	Erector Spin	Lateral	Lying	Left	Relaxed	22.8	457	2.02	12.5	0.82	15	Fabio Valenti	000560	2024	1	5	3	Day
7.33025e+18	2024-01-31 13:59:21	1			1979-07-18	Male	187	78	22.3	Left	SECOND TESTING 30 min	Erector Spin	Lateral	Lying	Right	Relaxed	18.1	449	1.89	12.2	0.79	15	Fabio Valenti	000560	2024	1	5	3	Day
7.33025e+18	2024-01-31 13:59:22	2			1979-07-18	Male	187	78	22.3	Left	SECOND TESTING 30 min	Erector Spin	Lateral	Lying	Right	Relaxed	18.2	454	1.86	12.1	0.79	15	Fabio Valenti	000560	2024	1	5	3	Day
7.33025e+18	2024-01-31 13:59:23	3			1979-07-18	Male	187	78	22.3	Left	SECOND TESTING 30 min	Erector Spin	Lateral	Lying	Right	Relaxed	17.9	455	1.87	12.1	0.79	15	Fabio Valenti	000560	2024	1	5	3	Day
7.33025e+18	2024-01-31 13:59:24	4			1979-07-18	Male	187	78	22.3	Left	SECOND TESTING 30 min	Erector Spin	Lateral	Lying	Right	Relaxed	18	458	1.87	12	0.78	15	Fabio Valenti	000560	2024	1	5	3	Day
7.33025e+18	2024-01-31 13:59:24	5			1979-07-18	Male	187	78	22.3	Left	SECOND TESTING 30 min	Erector Spin	Lateral	Lying	Right	Relaxed	18.4	461	1.83	11.9	0.78	15	Fabio Valenti	000560	2024	1	5	3	Day
7.33025e+18	2024-01-31 14:00:06	1			1979-07-18	Male	187	78	22.3	Left	SECOND TESTING 30 min	Erector Spin	Lateral	Sitting	Left	Relaxed	24.3	587	0.69	8.8	0.57	15	Fabio Valenti	000560	2024	1	5	3	Day
7.33025e+18	2024-01-31 14:00:06	2			1979-07-18	Male	187	78	22.3	Left	SECOND TESTING 30 min	Erector Spin	Lateral	Sitting	Left	Relaxed	24.3	585	0.7	8.8	0.58	15	Fabio Valenti	000560	2024	1	5	3	Day
7.33025e+18	2024-01-31 14:00:07	3			1979-07-18	Male	187	78	22.3	Left	SECOND TESTING 30 min	Erector Spin	Lateral	Sitting	Left	Relaxed	24.4	596	0.7	8.8	0.58	15	Fabio Valenti	000560	2024	1	5	3	Day
7.33025e+18	2024-01-31 14:00:08	4			1979-07-18	Male	187	78	22.3	Left	SECOND TESTING 30 min	Erector Spin	Lateral	Sitting	Left	Relaxed	24.7	600	0.69	8.8	0.58	15	Fabio Valenti	000560	2024	1	5	3	Day
7.33025e+18	2024-01-31 14:00:09	5			1979-07-18	Male	187	78	22.3	Left	SECOND TESTING 30 min	Erector Spin	Lateral	Sitting	Left	Relaxed	24.7	603	0.68	8.7	0.57	15	Fabio Valenti	000560	2024	1	5	3	Day
7.33025e+18	2024-01-31 14:01:05	1			1979-07-18	Male	187	78	22.3	Left	SECOND TESTING 30 min	Erector Spin	Lateral	Sitting	Right	Relaxed	32.1	863	0.62	5.6	0.39	15	Fabio Valenti	000560	2024	1	5	3	Day
7.33025e+18	2024-01-31 14:01:05	2			1979-07-18	Male	187	78	22.3	Left	SECOND TESTING 30 min	Erector Spin	Lateral	Sitting	Right	Relaxed	32.5	871	0.61	5.6	0.39	15	Fabio Valenti	000560	2024	1	5	3	Day
7.33025e+18	2024-01-31 14:01:06	3			1979-07-18	Male	187	78	22.3	Left	SECOND TESTING 30 min	Erector Spin	Lateral	Sitting	Right	Relaxed	32.4	873	0.6	5.6	0.39	15	Fabio Valenti	000560	2024	1	5	3	Day
7.33025e+18	2024-01-31 14:01:07	4			1979-07-18	Male	187	78	22.3	Left	SECOND TESTING 30 min	Erector Spin	Lateral	Sitting	Right	Relaxed	32.8	881	0.6	5.6	0.39	15	Fabio Valenti	000560	2024	1	5	3	Day
7.33025e+18	2024-01-31 14:01:08	5			1979-07-18	Male	187	78	22.3	Left	SECOND TESTING 30 min	Erector Spin	Lateral	Sitting	Right	Relaxed	32.7	883	0.59	5.6	0.39	15	Fabio Valenti	000560	2024	1	5	3	Day
7.33061e+18	2024-02-01 13:23:25	1			1979-07-18	Male	187	78	22.3	Left	THIRD TEST 24h	Erector Spin	Lateral	Lying	Left	Relaxed	23.2	439	1.99	12.9	0.82	15	Fabio Valenti	000560	2024	2	5	4	Day
7.33061e+18	2024-02-01 13:23:26	2			1979-07-18	Male	187	78	22.3	Left	THIRD TEST 24h	Erector Spin	Lateral	Lying	Left	Relaxed	23.1	442	1.95	12.8	0.82	15	Fabio Valenti	000560	2024	2	5	4	Day
7.33061e+18	2024-02-01 13:23:26	3			1979-07-18	Male	187	78	22.3	Left	THIRD TEST 24h	Erector Spin	Lateral	Lying	Left	Relaxed	23.1	441	1.92	12.8	0.82	15	Fabio Valenti	000560	2024	2	5	4	Day
7.33061e+18	2024-02-01 13:23:27	4			1979-07-18	Male	187	78	22.3	Left	THIRD TEST 24h	Erector Spin	Lateral	Lying	Left	Relaxed	23.2	445	1.91	12.7	0.81	15	Fabio Valenti	000560	2024	2	5	4	Day
7.33061e+18	2024-02-01 13:23:28	5			1979-07-18	Male	187	78	22.3	Left	THIRD TEST 24h	Erector Spin	Lateral	Lying	Left	Relaxed	23.3	446	1.95	12.7	0.81	15	Fabio Valenti	000560	2024	2	5	4	Day
7.33061e+18	2024-02-01 13:23:35	1			1979-07-18	Male	187	78	22.3	Left	THIRD TEST 24h	Erector Spin	Lateral	Lying	Right	Relaxed	17.8	446	1.98	12.2	0.78	15	Fabio Valenti	000560	2024	2	5	4	Day
7.33061e+18	2024-02-01 13:23:36	2			1979-07-18	Male	187	78	22.3	Left	THIRD TEST 24h	Erector Spin	Lateral	Lying	Right	Relaxed	17.6	449	1.99	12.1	0.77	15	Fabio Valenti	000560	2024	2	5	4	Day
7.33061e+18	2024-02-01 13:23:37	3			1979-07-18	Male	187	78	22.3	Left	THIRD TEST 24h	Erector Spin	Lateral	Lying	Right	Relaxed	17.4	450	1.99	12.1	0.77	15	Fabio Valenti	000560	2024	2	5	4	Day
7.33061e+18	2024-02-01 13:23:37	4			1979-07-18	Male	187	78	22.3	Left	THIRD TEST 24h	Erector Spin	Lateral	Lying	Right	Relaxed	17.6	455	1.99	11.8	0.75	15	Fabio Valenti	000560	2024	2	5	4	Day
7.33061e+18	2024-02-01 13:23:39	5			1979-07-18	Male	187	78	22.3	Left	THIRD TEST 24h	Erector Spin	Lateral	Lying	Right	Relaxed	17.6	452	1.92	11.9	0.76	15	Fabio Valenti	000560	2024	2	5	4	Day
7.33061e+18	2024-02-01 13:24:22	1			1979-07-18	Male	187	78	22.3	Left	THIRD TEST 24h	Erector Spin	Lateral	Sitting	Left	Relaxed	20.5	478	0.97	11.1	0.7	15	Fabio Valenti	000560	2024	2	5	4	Day
7.33061e+18	2024-02-01 13:24:22	2			1979-07-18	Male	187	78	22.3	Left	THIRD TEST 24h	Erector Spin	Lateral	Sitting	Left	Relaxed	20.6	485	0.95	11	0.7	15	Fabio Valenti	000560	2024	2	5	4	Day
7.33061e+18	2024-02-01 13:24:23	3			1979-07-18	Male	187	78	22.3	Left	THIRD TEST 24h	Erector Spin	Lateral	Sitting	Left	Relaxed	20.6	487	0.92	10.9	0.7	15	Fabio Valenti	000560	2024	2	5	4	Day
7.33061e+18	2024-02-01 13:24:24	4			1979-07-18	Male	187	78	22.3	Left	THIRD TEST 24h	Erector Spin	Lateral	Sitting	Left	Relaxed	20.7	491	0.93	11	0.7	15	Fabio Valenti	000560	2024	2	5	4	Day
7.33061e+18	2024-02-01 13:24:25	5			1979-07-18	Male	187	78	22.3	Left	THIRD TEST 24h	Erector Spin	Lateral	Sitting	Left	Relaxed	20.6	491	0.94	11	0.7	15	Fabio Valenti	000560	2024	2	5	4	Day
7.33061e+18	2024-02-01 13:24:43	1			1979-07-18	Male	187	78	22.3	Left	THIRD TEST 24h	Erector Spin	Lateral	Sitting	Right	Relaxed	24.6	600	0.77	8.6	0.55	15	Fabio Valenti	000560	2024	2	5	4	Day
7.33061e+18	2024-02-01 13:24:44	2			1979-07-18	Male	187	78	22.3	Left	THIRD TEST 24h	Erector Spin	Lateral	Sitting	Right	Relaxed	24.4	611	0.77	8.5	0.55	15	Fabio Valenti	000560	2024	2	5	4	Day
7.33061e+18	2024-02-01 13:24:45	3			1979-07-18	Male	187	78	22.3	Left	THIRD TEST 24h	Erector Spin	Lateral	Sitting	Right	Relaxed	24.6	615	0.74	8.5	0.55	15	Fabio Valenti	000560	2024	2	5	4	Day
7.33061e+18	2024-02-01 13:24:46	4			1979-07-18	Male	187	78	22.3	Left	THIRD TEST 24h	Erector Spin	Lateral	Sitting	Right	Relaxed	24.6	614	0.73	8.5	0.55	15	Fabio Valenti	000560	2024	2	5	4	Day
7.33061e+18	2024-02-01 13:24:46	5			1979-07-18	Male	187	78	22.3	Left	THIRD TEST 24h	Erector Spin	Lateral	Sitting	Right	Relaxed	24.6	615	0.74	8.4	0.54	15	Fabio Valenti	000560	2024	2	5	4	Day
7.32984e+18	2024-01-30 11:41:36	1			2002-06-05	Male	188	79	22.4	Right	FIRST TEST	Erector Spin	Lateral	Lying	Left	Relaxed	16.9	342	1.12	15.2	0.94	15	Fabio Valenti	000560	2024	1	5	2	Morning
7.32984e+18	2024-01-30 11:41:36	2			2002-06-05	Male	188	79	22.4	Right	FIRST TEST	Erector Spin	Lateral	Lying	Left	Relaxed	16.9	353	1.07	15.4	0.96	15	Fabio Valenti	000560	2024	1	5	2	Morning
7.32984e+18	2024-01-30 11:41:37	3			2002-06-05	Male	188	79	22.4	Right	FIRST TEST	Erector Spin	Lateral	Lying	Left	Relaxed	17	359	1.05	15.2	0.95	15	Fabio Valenti	000560	2024	1	5	2	Morning
7.32984e+18	2024-01-30 11:41:38	4			2002-06-05	Male	188	79	22.4	Right	FIRST TEST	Erector Spin	Lateral	Lying	Left	Relaxed	17	355	1.05	15.1	0.94	15	Fabio Valenti	000560	2024	1	5	2	Morning
7.32984e+18	2024-01-30 11:41:39	5			2002-06-05	Male	188	79	22.4	Right	FIRST TEST	Erector Spin	Lateral	Lying	Left	Relaxed	17.1	357	1.07	15.1	0.94	15	Fabio Valenti	000560	2024	1	5	2	Morning
7.32984e+18	2024-01-30 11:41:49	1			2002-06-05	Male	188	79	22.4	Right	FIRST TEST	Erector Spin	Lateral	Lying	Right	Relaxed	18.7	431	1.05	12.9	0.82	15	Fabio Valenti	000560	2024	1	5	2	Morning
7.32984e+18	2024-01-30 11:41:50	2			2002-06-05	Male	188	79	22.4	Right	FIRST TEST	Erector Spin	Lateral	Lying	Right	Relaxed	18.6	435	1.03	12.7	0.81	15	Fabio Valenti	000560	2024	1	5	2	Morning
7.32984e+18	2024-01-30 11:41:50	3			2002-06-05	Male	188	79	22.4	Right	FIRST TEST	Erector Spin	Lateral	Lying	Right	Relaxed	18.7	440	1.05	12.6	0.81	15	Fabio Valenti	000560	2024	1	5	2	Morning
7.32984e+18	2024-01-30 11:41:51	4			2002-06-05	Male	188	79	22.4	Right	FIRST TEST	Erector Spin	Lateral	Lying	Right	Relaxed	18.8	444	1.03	12.5	0.8	15	Fabio Valenti	000560	2024	1	5	2	Morning
7.32984e+18	2024-01-30 11:41:52	5			2002-06-05	Male	188	79	22.4	Right	FIRST TEST	Erector Spin	Lateral	Lying	Right	Relaxed	18.6	445	1.03	12.5	0.8	15	Fabio Valenti	000560	2024	1	5	2	Morning
7.32984e+18	2024-01-30 11:43:12	1			2002-06-05	Male	188	79	22.4	Right	FIRST TEST	Erector Spin	Lateral	Sitting	Left	Relaxed	28.1	842	0.65	6.1	0.42	15	Fabio Valenti	000560	2024	1	5	2	Morning
7.32984e+18	2024-01-30 11:43:13	2			2002-06-05	Male	188	79	22.4	Right	FIRST TEST	Erector Spin	Lateral	Sitting	Left	Relaxed	28.2	835	0.64	5.9	0.41	15	Fabio Valenti	000560	2024	1	5	2	Morning
7.32984e+18	2024-01-30 11:43:14	3			2002-06-05	Male	188	79	22.4	Right	FIRST TEST	Erector Spin	Lateral	Sitting	Left	Relaxed	28.1	839	0.64	6.1	0.42	15	Fabio Valenti	000560	2024	1	5	2	Morning
7.32984e+18	2024-01-30 11:43:14	4			2002-06-05	Male	188	79	22.4	Right	FIRST TEST	Erector Spin	Lateral	Sitting	Left	Relaxed	28.3	837	0.64	6	0.42	15	Fabio Valenti	000560	2024	1	5	2	Morning
7.32984e+18	2024-01-30 11:43:15	5			2002-06-05	Male	188	79	22.4	Right	FIRST TEST	Erector Spin	Lateral	Sitting	Left	Relaxed	28.6	846	0.62	5.9	0.41	15	Fabio Valenti	000560	2024	1	5	2	Morning
7.32984e+18	2024-01-30 11:43:22	1			2002-06-05	Male	188	79	22.4	Right	FIRST TEST	Erector Spin	Lateral	Sitting	Right	Relaxed	22.6	611	0.76	8.5	0.55	15	Fabio Valenti	000560	2024	1	5	2	Morning
7.32984e+18	2024-01-30 11:43:23	2			2002-06-05	Male	188	79	22.4	Right	FIRST TEST	Erector Spin	Lateral	Sitting	Right	Relaxed	22.5	614	0.75	8.4	0.55	15	Fabio Valenti	000560	2024	1	5	2	Morning
7.32984e+18	2024-01-30 11:43:23	3			2002-06-05	Male	188	79	22.4	Right	FIRST TEST	Erector Spin	Lateral	Sitting	Right	Relaxed	22.4	617	0.73	8.4	0.54	15	Fabio Valenti	000560	2024	1	5	2	Morning
7.32984e+18	2024-01-30 11:43:24	4			2002-06-05	Male	188	79	22.4	Right	FIRST TEST	Erector Spin	Lateral	Sitting	Right	Relaxed	22.6	610	0.74	8.4	0.54	15	Fabio Valenti	000560	2024	1	5	2	Morning
7.32984e+18	2024-01-30 11:43:25	5			2002-06-05	Male	188	79	22.4	Right	FIRST TEST	Erector Spin	Lateral	Sitting	Right	Relaxed	22.4	607	0.73	8.4	0.54	15	Fabio Valenti	000560	2024	1	5	2	Morning
7.32985e+18	2024-01-30 12:10:14	1			2002-06-05	Male	188	79	22.4	Right	SECOND TESTING 30 min	Erector Spin	Lateral	Lying	Left	Relaxed	17.7	363	1.02	14.6	0.9	15	Fabio Valenti	000560	2024	1	5	2	Day
7.32985e+18	2024-01-30 12:10:15	2			2002-06-05	Male	188	79	22.4	Right	SECOND TESTING 30 min	Erector Spin	Lateral	Lying	Left	Relaxed	17.7	362	0.99	14.7	0.91	15	Fabio Valenti	000560	2024	1	5	2	Day
7.32985e+18	2024-01-30 12:10:15	3			2002-06-05	Male	188	79	22.4	Right	SECOND TESTING 30 min	Erector Spin	Lateral	Lying	Left	Relaxed	17.8	365	0.99	14.6	0.9	15	Fabio Valenti	000560	2024	1	5	2	Day
7.32985e+18	2024-01-30 12:10:16	4			2002-06-05	Male	188	79	22.4	Right	SECOND TESTING 30 min	Erector Spin	Lateral	Lying	Left	Relaxed	17.8	366	0.98	14.6	0.9	15	Fabio Valenti	000560	2024	1	5	2	Day
7.32985e+18	2024-01-30 12:10:17	5			2002-06-05	Male	188	79	22.4	Right	SECOND TESTING 30 min	Erector Spin	Lateral	Lying	Left	Relaxed	17.9	368	0.98	14.6	0.9	15	Fabio Valenti	000560	2024	1	5	2	Day
7.32985e+18	2024-01-30 12:10:24	1			2002-06-05	Male	188	79	22.4	Right	SECOND TESTING 30 min	Erector Spin	Lateral	Lying	Right	Relaxed	17.4	363	0.92	14.5	0.89	15	Fabio Valenti	000560	2024	1	5	2	Day
7.32985e+18	2024-01-30 12:10:25	2			2002-06-05	Male	188	79	22.4	Right	SECOND TESTING 30 min	Erector Spin	Lateral	Lying	Right	Relaxed	17.5	370	0.88	14.3	0.88	15	Fabio Valenti	000560	2024	1	5	2	Day
7.32985e+18	2024-01-30 12:10:25	3			2002-06-05	Male	188	79	22.4	Right	SECOND TESTING 30 min	Erector Spin	Lateral	Lying	Right	Relaxed	17.5	372	0.88	14.1	0.87	15	Fabio Valenti	000560	2024	1	5	2	Day
7.32985e+18	2024-01-30 12:10:26	4			2002-06-05	Male	188	79	22.4	Right	SECOND TESTING 30 min	Erector Spin	Lateral	Lying	Right	Relaxed	17.7	377	0.88	14	0.86	15	Fabio Valenti	000560	2024	1	5	2	Day
7.32985e+18	2024-01-30 12:10:27	5			2002-06-05	Male	188	79	22.4	Right	SECOND TESTING 30 min	Erector Spin	Lateral	Lying	Right	Relaxed	17.7	382	0.86	13.8	0.85	15	Fabio Valenti	000560	2024	1	5	2	Day
7.32985e+18	2024-01-30 12:10:53	1			2002-06-05	Male	188	79	22.4	Right	SECOND TESTING 30 min	Erector Spin	Lateral	Sitting	Left	Relaxed	26.7	742	0.67	7	0.47	15	Fabio Valenti	000560	2024	1	5	2	Day
7.32985e+18	2024-01-30 12:10:54	2			2002-06-05	Male	188	79	22.4	Right	SECOND TESTING 30 min	Erector Spin	Lateral	Sitting	Left	Relaxed	26.8	747	0.66	7	0.47	15	Fabio Valenti	000560	2024	1	5	2	Day
7.32985e+18	2024-01-30 12:10:55	3			2002-06-05	Male	188	79	22.4	Right	SECOND TESTING 30 min	Erector Spin	Lateral	Sitting	Left	Relaxed	27	750	0.68	7	0.47	15	Fabio Valenti	000560	2024	1	5	2	Day
7.32985e+18	2024-01-30 12:10:56	4			2002-06-05	Male	188	79	22.4	Right	SECOND TESTING 30 min	Erector Spin	Lateral	Sitting	Left	Relaxed	26.9	746	0.66	6.9	0.46	15	Fabio Valenti	000560	2024	1	5	2	Day
7.32985e+18	2024-01-30 12:10:57	5			2002-06-05	Male	188	79	22.4	Right	SECOND TESTING 30 min	Erector Spin	Lateral	Sitting	Left	Relaxed	26.8	749	0.68	6.9	0.46	15	Fabio Valenti	000560	2024	1	5	2	Day
7.32985e+18	2024-01-30 12:11:20	1			2002-06-05	Male	188	79	22.4	Right	SECOND TESTING 30 min	Erector Spin	Lateral	Sitting	Right	Relaxed	21.7	631	0.75	8.4	0.54	15	Fabio Valenti	000560	2024	1	5	2	Day
7.32985e+18	2024-01-30 12:11:23	2			2002-06-05	Male	188	79	22.4	Right	SECOND TESTING 30 min	Erector Spin	Lateral	Sitting	Right	Relaxed	21.9	631	0.73	8.4	0.55	15	Fabio Valenti	000560	2024	1	5	2	Day
7.32985e+18	2024-01-30 12:11:23	3			2002-06-05	Male	188	79	22.4	Right	SECOND TESTING 30 min	Erector Spin	Lateral	Sitting	Right	Relaxed	21.8	628	0.71	8.4	0.55	15	Fabio Valenti	000560	2024	1	5	2	Day
7.32985e+18	2024-01-30 12:11:24	4			2002-06-05	Male	188	79	22.4	Right	SECOND TESTING 30 min	Erector Spin	Lateral	Sitting	Right	Relaxed	21.8	634	0.71	8.4	0.55	15	Fabio Valenti	000560	2024	1	5	2	Day
7.32985e+18	2024-01-30 12:11:25	5			2002-06-05	Male	188	79	22.4	Right	SECOND TESTING 30 min	Erector Spin	Lateral	Sitting	Right	Relaxed	21.8	636	0.7	8.4	0.55	15	Fabio Valenti	000560	2024	1	5	2	Day
7.33021e+18	2024-01-31 11:42:34	1			2002-06-05	Male	188	79	22.4	Right	THIRD TEST 24h	Erector Spin	Lateral	Lying	Left	Relaxed	17.6	357	1.16	14.7	0.91	15	Fabio Valenti	000560	2024	1	5	3	Morning
7.33021e+18	2024-01-31 11:42:35	2			2002-06-05	Male	188	79	22.4	Right	THIRD TEST 24h	Erector Spin	Lateral	Lying	Left	Relaxed	17.7	366	1.18	14.5	0.9	15	Fabio Valenti	000560	2024	1	5	3	Morning
7.33021e+18	2024-01-31 11:42:36	3			2002-06-05	Male	188	79	22.4	Right	THIRD TEST 24h	Erector Spin	Lateral	Lying	Left	Relaxed	17.8	370	1.18	14.3	0.89	15	Fabio Valenti	000560	2024	1	5	3	Morning
7.33021e+18	2024-01-31 11:42:36	4			2002-06-05	Male	188	79	22.4	Right	THIRD TEST 24h	Erector Spin	Lateral	Lying	Left	Relaxed	17.9	373	1.17	14.2	0.89	15	Fabio Valenti	000560	2024	1	5	3	Morning
7.33021e+18	2024-01-31 11:42:37	5			2002-06-05	Male	188	79	22.4	Right	THIRD TEST 24h	Erector Spin	Lateral	Lying	Left	Relaxed	17.9	380	1.19	14.2	0.89	15	Fabio Valenti	000560	2024	1	5	3	Morning
7.33021e+18	2024-01-31 11:42:43	1			2002-06-05	Male	188	79	22.4	Right	THIRD TEST 24h	Erector Spin	Lateral	Lying	Right	Relaxed	17.3	357	0.91	14.3	0.88	15	Fabio Valenti	000560	2024	1	5	3	Morning
7.33021e+18	2024-01-31 11:42:44	2			2002-06-05	Male	188	79	22.4	Right	THIRD TEST 24h	Erector Spin	Lateral	Lying	Right	Relaxed	17.4	366	0.9	14	0.86	15	Fabio Valenti	000560	2024	1	5	3	Morning
7.33021e+18	2024-01-31 11:42:45	3			2002-06-05	Male	188	79	22.4	Right	THIRD TEST 24h	Erector Spin	Lateral	Lying	Right	Relaxed	17.4	369	0.87	14	0.86	15	Fabio Valenti	000560	2024	1	5	3	Morning
7.33021e+18	2024-01-31 11:42:45	4			2002-06-05	Male	188	79	22.4	Right	THIRD TEST 24h	Erector Spin	Lateral	Lying	Right	Relaxed	17.6	376	0.88	13.8	0.86	15	Fabio Valenti	000560	2024	1	5	3	Morning
7.33021e+18	2024-01-31 11:42:46	5			2002-06-05	Male	188	79	22.4	Right	THIRD TEST 24h	Erector Spin	Lateral	Lying	Right	Relaxed	17.7	380	0.88	13.7	0.85	15	Fabio Valenti	000560	2024	1	5	3	Morning
7.33021e+18	2024-01-31 11:44:28	1			2002-06-05	Male	188	79	22.4	Right	THIRD TEST 24h	Erector Spin	Lateral	Sitting	Left	Relaxed	24.9	731	0.68	7.2	0.48	15	Fabio Valenti	000560	2024	1	5	3	Morning
7.33021e+18	2024-01-31 11:44:29	2			2002-06-05	Male	188	79	22.4	Right	THIRD TEST 24h	Erector Spin	Lateral	Sitting	Left	Relaxed	24.9	728	0.68	7.2	0.48	15	Fabio Valenti	000560	2024	1	5	3	Morning
7.33021e+18	2024-01-31 11:44:30	3			2002-06-05	Male	188	79	22.4	Right	THIRD TEST 24h	Erector Spin	Lateral	Sitting	Left	Relaxed	24.8	728	0.67	7.2	0.48	15	Fabio Valenti	000560	2024	1	5	3	Morning
7.33021e+18	2024-01-31 11:44:31	4			2002-06-05	Male	188	79	22.4	Right	THIRD TEST 24h	Erector Spin	Lateral	Sitting	Left	Relaxed	24.9	732	0.66	7.2	0.48	15	Fabio Valenti	000560	2024	1	5	3	Morning
7.33021e+18	2024-01-31 11:44:32	5			2002-06-05	Male	188	79	22.4	Right	THIRD TEST 24h	Erector Spin	Lateral	Sitting	Left	Relaxed	24.9	736	0.67	7	0.47	15	Fabio Valenti	000560	2024	1	5	3	Morning
7.33021e+18	2024-01-31 11:44:55	1			2002-06-05	Male	188	79	22.4	Right	THIRD TEST 24h	Erector Spin	Lateral	Sitting	Right	Relaxed	21.8	619	0.71	8.4	0.55	15	Fabio Valenti	000560	2024	1	5	3	Morning
7.33021e+18	2024-01-31 11:44:55	2			2002-06-05	Male	188	79	22.4	Right	THIRD TEST 24h	Erector Spin	Lateral	Sitting	Right	Relaxed	21.7	627	0.71	8.2	0.54	15	Fabio Valenti	000560	2024	1	5	3	Morning
7.33021e+18	2024-01-31 11:44:56	3			2002-06-05	Male	188	79	22.4	Right	THIRD TEST 24h	Erector Spin	Lateral	Sitting	Right	Relaxed	21.8	639	0.69	8.2	0.54	15	Fabio Valenti	000560	2024	1	5	3	Morning
7.33021e+18	2024-01-31 11:44:57	4			2002-06-05	Male	188	79	22.4	Right	THIRD TEST 24h	Erector Spin	Lateral	Sitting	Right	Relaxed	21.9	642	0.69	8.2	0.54	15	Fabio Valenti	000560	2024	1	5	3	Morning
7.33021e+18	2024-01-31 11:44:58	5			2002-06-05	Male	188	79	22.4	Right	THIRD TEST 24h	Erector Spin	Lateral	Sitting	Right	Relaxed	22.1	642	0.68	8.1	0.53	15	Fabio Valenti	000560	2024	1	5	3	Morning
7.32253e+18	2024-01-10 18:43:39	1			1981-05-10	Female	173	60	20	Right	FIRST TEST	Erector Spin	Lateral	Lying	Left	Relaxed	13.4	235	1.43	24.4	1.48	15	Fabio Valenti	000560	2024	1	2	3	Evening
7.32253e+18	2024-01-10 18:43:40	2			1981-05-10	Female	173	60	20	Right	FIRST TEST	Erector Spin	Lateral	Lying	Left	Relaxed	13.6	239	1.42	24.1	1.46	15	Fabio Valenti	000560	2024	1	2	3	Evening
7.32253e+18	2024-01-10 18:43:41	3			1981-05-10	Female	173	60	20	Right	FIRST TEST	Erector Spin	Lateral	Lying	Left	Relaxed	13.6	240	1.45	24.3	1.48	15	Fabio Valenti	000560	2024	1	2	3	Evening
7.32253e+18	2024-01-10 18:43:42	4			1981-05-10	Female	173	60	20	Right	FIRST TEST	Erector Spin	Lateral	Lying	Left	Relaxed	13.7	242	1.46	24.1	1.47	15	Fabio Valenti	000560	2024	1	2	3	Evening
7.32253e+18	2024-01-10 18:43:43	5			1981-05-10	Female	173	60	20	Right	FIRST TEST	Erector Spin	Lateral	Lying	Left	Relaxed	13.7	242	1.44	24.2	1.47	15	Fabio Valenti	000560	2024	1	2	3	Evening
7.32253e+18	2024-01-10 18:44:06	1			1981-05-10	Female	173	60	20	Right	FIRST TEST	Erector Spin	Lateral	Lying	Right	Relaxed	16.3	288	1.36	19	1.16	15	Fabio Valenti	000560	2024	1	2	3	Evening
7.32253e+18	2024-01-10 18:44:16	2			1981-05-10	Female	173	60	20	Right	FIRST TEST	Erector Spin	Lateral	Lying	Right	Relaxed	16.6	302	1.34	18.5	1.14	15	Fabio Valenti	000560	2024	1	2	3	Evening
7.32253e+18	2024-01-10 18:44:16	3			1981-05-10	Female	173	60	20	Right	FIRST TEST	Erector Spin	Lateral	Lying	Right	Relaxed	16.5	300	1.32	18.5	1.14	15	Fabio Valenti	000560	2024	1	2	3	Evening
7.32253e+18	2024-01-10 18:44:17	4			1981-05-10	Female	173	60	20	Right	FIRST TEST	Erector Spin	Lateral	Lying	Right	Relaxed	16.5	300	1.31	18.5	1.14	15	Fabio Valenti	000560	2024	1	2	3	Evening
7.32253e+18	2024-01-10 18:44:18	5			1981-05-10	Female	173	60	20	Right	FIRST TEST	Erector Spin	Lateral	Lying	Right	Relaxed	16.6	299	1.31	18.5	1.14	15	Fabio Valenti	000560	2024	1	2	3	Evening
7.32253e+18	2024-01-10 18:45:10	1			1981-05-10	Female	173	60	20	Right	FIRST TEST	Erector Spin	Lateral	Sitting	Left	Relaxed	14.2	347	1.58	15.3	0.93	15	Fabio Valenti	000560	2024	1	2	3	Evening
7.32253e+18	2024-01-10 18:45:11	2			1981-05-10	Female	173	60	20	Right	FIRST TEST	Erector Spin	Lateral	Sitting	Left	Relaxed	13.8	346	1.56	15.5	0.94	15	Fabio Valenti	000560	2024	1	2	3	Evening
7.32253e+18	2024-01-10 18:45:11	3			1981-05-10	Female	173	60	20	Right	FIRST TEST	Erector Spin	Lateral	Sitting	Left	Relaxed	13.9	335	1.53	15.4	0.92	15	Fabio Valenti	000560	2024	1	2	3	Evening
7.32253e+18	2024-01-10 18:45:12	4			1981-05-10	Female	173	60	20	Right	FIRST TEST	Erector Spin	Lateral	Sitting	Left	Relaxed	13.9	345	1.58	15.4	0.93	15	Fabio Valenti	000560	2024	1	2	3	Evening
7.32253e+18	2024-01-10 18:45:13	5			1981-05-10	Female	173	60	20	Right	FIRST TEST	Erector Spin	Lateral	Sitting	Left	Relaxed	13.8	327	1.54	15.9	0.95	15	Fabio Valenti	000560	2024	1	2	3	Evening
7.32253e+18	2024-01-10 18:45:54	1			1981-05-10	Female	173	60	20	Right	FIRST TEST	Erector Spin	Lateral	Sitting	Right	Relaxed	17.5	504	1.37	11.4	0.74	15	Fabio Valenti	000560	2024	1	2	3	Evening
7.32253e+18	2024-01-10 18:45:54	2			1981-05-10	Female	173	60	20	Right	FIRST TEST	Erector Spin	Lateral	Sitting	Right	Relaxed	17.8	520	1.32	11.2	0.74	15	Fabio Valenti	000560	2024	1	2	3	Evening
7.32253e+18	2024-01-10 18:45:55	3			1981-05-10	Female	173	60	20	Right	FIRST TEST	Erector Spin	Lateral	Sitting	Right	Relaxed	17.6	518	1.38	11.3	0.74	15	Fabio Valenti	000560	2024	1	2	3	Evening
7.32253e+18	2024-01-10 18:45:56	4			1981-05-10	Female	173	60	20	Right	FIRST TEST	Erector Spin	Lateral	Sitting	Right	Relaxed	17.5	521	1.35	11.3	0.74	15	Fabio Valenti	000560	2024	1	2	3	Evening
7.32253e+18	2024-01-10 18:45:57	5			1981-05-10	Female	173	60	20	Right	FIRST TEST	Erector Spin	Lateral	Sitting	Right	Relaxed	17.6	526	1.33	11.1	0.73	15	Fabio Valenti	000560	2024	1	2	3	Evening
7.32253e+18	2024-01-10 19:12:51	1			1981-05-10	Female	173	60	20	Right	SECOND TESTING 30 min	Erector Spin	Lateral	Lying	Left	Relaxed	16.4	290	1.22	19.1	1.17	15	Fabio Valenti	000560	2024	1	2	3	Evening
7.32253e+18	2024-01-10 19:12:51	2			1981-05-10	Female	173	60	20	Right	SECOND TESTING 30 min	Erector Spin	Lateral	Lying	Left	Relaxed	16.4	295	1.23	18.6	1.14	15	Fabio Valenti	000560	2024	1	2	3	Evening
7.32253e+18	2024-01-10 19:12:52	3			1981-05-10	Female	173	60	20	Right	SECOND TESTING 30 min	Erector Spin	Lateral	Lying	Left	Relaxed	16.6	304	1.26	18.3	1.13	15	Fabio Valenti	000560	2024	1	2	3	Evening
7.32253e+18	2024-01-10 19:12:53	4			1981-05-10	Female	173	60	20	Right	SECOND TESTING 30 min	Erector Spin	Lateral	Lying	Left	Relaxed	16.6	306	1.28	18.3	1.13	15	Fabio Valenti	000560	2024	1	2	3	Evening
7.32253e+18	2024-01-10 19:12:54	5			1981-05-10	Female	173	60	20	Right	SECOND TESTING 30 min	Erector Spin	Lateral	Lying	Left	Relaxed	16.5	299	1.23	18.6	1.15	15	Fabio Valenti	000560	2024	1	2	3	Evening
7.32253e+18	2024-01-10 19:13:16	1			1981-05-10	Female	173	60	20	Right	SECOND TESTING 30 min	Erector Spin	Lateral	Lying	Right	Relaxed	14.4	241	1.31	23.6	1.44	15	Fabio Valenti	000560	2024	1	2	3	Evening
7.32253e+18	2024-01-10 19:13:16	2			1981-05-10	Female	173	60	20	Right	SECOND TESTING 30 min	Erector Spin	Lateral	Lying	Right	Relaxed	14.3	250	1.29	23.4	1.43	15	Fabio Valenti	000560	2024	1	2	3	Evening
7.32253e+18	2024-01-10 19:13:17	3			1981-05-10	Female	173	60	20	Right	SECOND TESTING 30 min	Erector Spin	Lateral	Lying	Right	Relaxed	14.3	252	1.29	23.4	1.43	15	Fabio Valenti	000560	2024	1	2	3	Evening
7.32253e+18	2024-01-10 19:13:18	4			1981-05-10	Female	173	60	20	Right	SECOND TESTING 30 min	Erector Spin	Lateral	Lying	Right	Relaxed	14.4	252	1.28	23.2	1.42	15	Fabio Valenti	000560	2024	1	2	3	Evening
7.32253e+18	2024-01-10 19:13:19	5			1981-05-10	Female	173	60	20	Right	SECOND TESTING 30 min	Erector Spin	Lateral	Lying	Right	Relaxed	14.4	246	1.28	23.3	1.42	15	Fabio Valenti	000560	2024	1	2	3	Evening
7.32253e+18	2024-01-10 19:13:44	1			1981-05-10	Female	173	60	20	Right	SECOND TESTING 30 min	Erector Spin	Lateral	Sitting	Left	Relaxed	15.6	396	1.56	13.9	0.87	15	Fabio Valenti	000560	2024	1	2	3	Evening
7.32253e+18	2024-01-10 19:13:44	2			1981-05-10	Female	173	60	20	Right	SECOND TESTING 30 min	Erector Spin	Lateral	Sitting	Left	Relaxed	15.2	392	1.55	14	0.87	15	Fabio Valenti	000560	2024	1	2	3	Evening
7.32253e+18	2024-01-10 19:13:45	3			1981-05-10	Female	173	60	20	Right	SECOND TESTING 30 min	Erector Spin	Lateral	Sitting	Left	Relaxed	15	388	1.54	14.1	0.87	15	Fabio Valenti	000560	2024	1	2	3	Evening
7.32253e+18	2024-01-10 19:13:46	4			1981-05-10	Female	173	60	20	Right	SECOND TESTING 30 min	Erector Spin	Lateral	Sitting	Left	Relaxed	15.2	389	1.54	14	0.87	15	Fabio Valenti	000560	2024	1	2	3	Evening
7.32253e+18	2024-01-10 19:13:47	5			1981-05-10	Female	173	60	20	Right	SECOND TESTING 30 min	Erector Spin	Lateral	Sitting	Left	Relaxed	15	385	1.54	14.2	0.88	15	Fabio Valenti	000560	2024	1	2	3	Evening
7.32253e+18	2024-01-10 19:14:00	1			1981-05-10	Female	173	60	20	Right	SECOND TESTING 30 min	Erector Spin	Lateral	Sitting	Right	Relaxed	20.1	582	1.36	9.6	0.63	15	Fabio Valenti	000560	2024	1	2	3	Evening
7.32253e+18	2024-01-10 19:14:01	2			1981-05-10	Female	173	60	20	Right	SECOND TESTING 30 min	Erector Spin	Lateral	Sitting	Right	Relaxed	19.6	598	1.3	9.6	0.64	15	Fabio Valenti	000560	2024	1	2	3	Evening
7.32253e+18	2024-01-10 19:14:02	3			1981-05-10	Female	173	60	20	Right	SECOND TESTING 30 min	Erector Spin	Lateral	Sitting	Right	Relaxed	19.7	603	1.33	9.6	0.64	15	Fabio Valenti	000560	2024	1	2	3	Evening
7.32253e+18	2024-01-10 19:14:03	4			1981-05-10	Female	173	60	20	Right	SECOND TESTING 30 min	Erector Spin	Lateral	Sitting	Right	Relaxed	19.6	606	1.31	9.5	0.64	15	Fabio Valenti	000560	2024	1	2	3	Evening
7.32253e+18	2024-01-10 19:14:03	5			1981-05-10	Female	173	60	20	Right	SECOND TESTING 30 min	Erector Spin	Lateral	Sitting	Right	Relaxed	19.6	608	1.31	9.5	0.64	15	Fabio Valenti	000560	2024	1	2	3	Evening
7.3229e+18	2024-01-11 18:53:50	1			1981-05-10	Female	173	60	20	Right	THIRD TEST 24h	Erector Spin	Lateral	Lying	Left	Relaxed	14.4	265	1.49	21.4	1.33	15	Fabio Valenti	000560	2024	1	2	4	Evening
7.3229e+18	2024-01-11 18:53:51	2			1981-05-10	Female	173	60	20	Right	THIRD TEST 24h	Erector Spin	Lateral	Lying	Left	Relaxed	14.2	268	1.48	21.6	1.34	15	Fabio Valenti	000560	2024	1	2	4	Evening
7.3229e+18	2024-01-11 18:53:52	3			1981-05-10	Female	173	60	20	Right	THIRD TEST 24h	Erector Spin	Lateral	Lying	Left	Relaxed	14.1	266	1.42	21.9	1.35	15	Fabio Valenti	000560	2024	1	2	4	Evening
7.3229e+18	2024-01-11 18:53:52	4			1981-05-10	Female	173	60	20	Right	THIRD TEST 24h	Erector Spin	Lateral	Lying	Left	Relaxed	14	265	1.42	21.9	1.35	15	Fabio Valenti	000560	2024	1	2	4	Evening
7.3229e+18	2024-01-11 18:53:53	5			1981-05-10	Female	173	60	20	Right	THIRD TEST 24h	Erector Spin	Lateral	Lying	Left	Relaxed	14.1	266	1.43	21.9	1.35	15	Fabio Valenti	000560	2024	1	2	4	Evening
7.3229e+18	2024-01-11 18:54:05	1			1981-05-10	Female	173	60	20	Right	THIRD TEST 24h	Erector Spin	Lateral	Lying	Right	Relaxed	14.6	252	1.19	21.5	1.32	15	Fabio Valenti	000560	2024	1	2	4	Evening
7.3229e+18	2024-01-11 18:54:05	2			1981-05-10	Female	173	60	20	Right	THIRD TEST 24h	Erector Spin	Lateral	Lying	Right	Relaxed	14.7	253	1.18	21.4	1.31	15	Fabio Valenti	000560	2024	1	2	4	Evening
7.3229e+18	2024-01-11 18:54:06	3			1981-05-10	Female	173	60	20	Right	THIRD TEST 24h	Erector Spin	Lateral	Lying	Right	Relaxed	14.6	252	1.19	21.6	1.32	15	Fabio Valenti	000560	2024	1	2	4	Evening
7.3229e+18	2024-01-11 18:54:07	4			1981-05-10	Female	173	60	20	Right	THIRD TEST 24h	Erector Spin	Lateral	Lying	Right	Relaxed	14.6	252	1.19	21.5	1.32	15	Fabio Valenti	000560	2024	1	2	4	Evening
7.3229e+18	2024-01-11 18:54:08	5			1981-05-10	Female	173	60	20	Right	THIRD TEST 24h	Erector Spin	Lateral	Lying	Right	Relaxed	14.6	254	1.19	21.3	1.3	15	Fabio Valenti	000560	2024	1	2	4	Evening
7.3229e+18	2024-01-11 18:54:32	1			1981-05-10	Female	173	60	20	Right	THIRD TEST 24h	Erector Spin	Lateral	Sitting	Left	Relaxed	14.9	316	1.29	16.8	1.03	15	Fabio Valenti	000560	2024	1	2	4	Evening
7.3229e+18	2024-01-11 18:54:32	2			1981-05-10	Female	173	60	20	Right	THIRD TEST 24h	Erector Spin	Lateral	Sitting	Left	Relaxed	14.6	317	1.3	17.2	1.05	15	Fabio Valenti	000560	2024	1	2	4	Evening
7.3229e+18	2024-01-11 18:54:33	3			1981-05-10	Female	173	60	20	Right	THIRD TEST 24h	Erector Spin	Lateral	Sitting	Left	Relaxed	14.6	332	1.29	17	1.05	15	Fabio Valenti	000560	2024	1	2	4	Evening
7.3229e+18	2024-01-11 18:54:34	4			1981-05-10	Female	173	60	20	Right	THIRD TEST 24h	Erector Spin	Lateral	Sitting	Left	Relaxed	14.5	328	1.28	17	1.05	15	Fabio Valenti	000560	2024	1	2	4	Evening
7.3229e+18	2024-01-11 18:54:35	5			1981-05-10	Female	173	60	20	Right	THIRD TEST 24h	Erector Spin	Lateral	Sitting	Left	Relaxed	14.5	331	1.27	17	1.05	15	Fabio Valenti	000560	2024	1	2	4	Evening
7.3229e+18	2024-01-11 18:54:42	1			1981-05-10	Female	173	60	20	Right	THIRD TEST 24h	Erector Spin	Lateral	Sitting	Right	Relaxed	18.1	499	1.32	11.8	0.77	15	Fabio Valenti	000560	2024	1	2	4	Evening
7.3229e+18	2024-01-11 18:54:42	2			1981-05-10	Female	173	60	20	Right	THIRD TEST 24h	Erector Spin	Lateral	Sitting	Right	Relaxed	17.9	502	1.28	11.9	0.78	15	Fabio Valenti	000560	2024	1	2	4	Evening
7.3229e+18	2024-01-11 18:54:43	3			1981-05-10	Female	173	60	20	Right	THIRD TEST 24h	Erector Spin	Lateral	Sitting	Right	Relaxed	17.9	502	1.26	11.9	0.79	15	Fabio Valenti	000560	2024	1	2	4	Evening
7.3229e+18	2024-01-11 18:54:44	4			1981-05-10	Female	173	60	20	Right	THIRD TEST 24h	Erector Spin	Lateral	Sitting	Right	Relaxed	17.9	505	1.26	11.9	0.79	15	Fabio Valenti	000560	2024	1	2	4	Evening
7.3229e+18	2024-01-11 18:54:45	5			1981-05-10	Female	173	60	20	Right	THIRD TEST 24h	Erector Spin	Lateral	Sitting	Right	Relaxed	17.8	506	1.27	11.9	0.79	15	Fabio Valenti	000560	2024	1	2	4	Evening
7.32313e+18	2024-01-12 09:46:16	1			1982-12-22	Male	175	70	22.9	Right	FIRST TEST	Erector Spin	Lateral	Lying	Left	Relaxed	16.3	323	1.1	15.2	0.92	15	Fabio Valenti	000560	2024	1	2	5	Morning
7.32313e+18	2024-01-12 09:46:17	2			1982-12-22	Male	175	70	22.9	Right	FIRST TEST	Erector Spin	Lateral	Lying	Left	Relaxed	16.3	329	1.08	15	0.91	15	Fabio Valenti	000560	2024	1	2	5	Morning
7.32313e+18	2024-01-12 09:46:17	3			1982-12-22	Male	175	70	22.9	Right	FIRST TEST	Erector Spin	Lateral	Lying	Left	Relaxed	16.4	332	1.08	15	0.92	15	Fabio Valenti	000560	2024	1	2	5	Morning
7.32313e+18	2024-01-12 09:46:18	4			1982-12-22	Male	175	70	22.9	Right	FIRST TEST	Erector Spin	Lateral	Lying	Left	Relaxed	16.6	334	1.07	14.8	0.9	15	Fabio Valenti	000560	2024	1	2	5	Morning
7.32313e+18	2024-01-12 09:46:19	5			1982-12-22	Male	175	70	22.9	Right	FIRST TEST	Erector Spin	Lateral	Lying	Left	Relaxed	16.5	335	1.07	14.8	0.91	15	Fabio Valenti	000560	2024	1	2	5	Morning
7.32313e+18	2024-01-12 09:47:08	1			1982-12-22	Male	175	70	22.9	Right	FIRST TEST	Erector Spin	Lateral	Lying	Right	Relaxed	16.4	294	1.09	16.3	0.98	15	Fabio Valenti	000560	2024	1	2	5	Morning
7.32313e+18	2024-01-12 09:47:09	2			1982-12-22	Male	175	70	22.9	Right	FIRST TEST	Erector Spin	Lateral	Lying	Right	Relaxed	16.3	292	1.07	16.3	0.98	15	Fabio Valenti	000560	2024	1	2	5	Morning
7.32313e+18	2024-01-12 09:47:10	3			1982-12-22	Male	175	70	22.9	Right	FIRST TEST	Erector Spin	Lateral	Lying	Right	Relaxed	16.5	301	1.11	16	0.96	15	Fabio Valenti	000560	2024	1	2	5	Morning
7.32313e+18	2024-01-12 09:47:11	4			1982-12-22	Male	175	70	22.9	Right	FIRST TEST	Erector Spin	Lateral	Lying	Right	Relaxed	16.4	301	1.1	16	0.96	15	Fabio Valenti	000560	2024	1	2	5	Morning
7.32313e+18	2024-01-12 09:47:12	5			1982-12-22	Male	175	70	22.9	Right	FIRST TEST	Erector Spin	Lateral	Lying	Right	Relaxed	16.4	305	1.09	16.1	0.97	15	Fabio Valenti	000560	2024	1	2	5	Morning
7.32313e+18	2024-01-12 09:47:58	1			1982-12-22	Male	175	70	22.9	Right	FIRST TEST	Erector Spin	Lateral	Sitting	Left	Relaxed	19.1	375	1.13	13.4	0.83	15	Fabio Valenti	000560	2024	1	2	5	Morning
7.32313e+18	2024-01-12 09:47:58	2			1982-12-22	Male	175	70	22.9	Right	FIRST TEST	Erector Spin	Lateral	Sitting	Left	Relaxed	19.1	375	1.13	13.5	0.84	15	Fabio Valenti	000560	2024	1	2	5	Morning
7.32313e+18	2024-01-12 09:47:59	3			1982-12-22	Male	175	70	22.9	Right	FIRST TEST	Erector Spin	Lateral	Sitting	Left	Relaxed	18.9	377	1.14	13.4	0.83	15	Fabio Valenti	000560	2024	1	2	5	Morning
7.32313e+18	2024-01-12 09:48:00	4			1982-12-22	Male	175	70	22.9	Right	FIRST TEST	Erector Spin	Lateral	Sitting	Left	Relaxed	19.1	370	1.14	13.5	0.83	15	Fabio Valenti	000560	2024	1	2	5	Morning
7.32313e+18	2024-01-12 09:48:00	5			1982-12-22	Male	175	70	22.9	Right	FIRST TEST	Erector Spin	Lateral	Sitting	Left	Relaxed	18.9	368	1.15	13.6	0.83	15	Fabio Valenti	000560	2024	1	2	5	Morning
7.32313e+18	2024-01-12 09:48:07	1			1982-12-22	Male	175	70	22.9	Right	FIRST TEST	Erector Spin	Lateral	Sitting	Right	Relaxed	19.9	376	0.97	13.1	0.81	15	Fabio Valenti	000560	2024	1	2	5	Morning
7.32313e+18	2024-01-12 09:48:08	2			1982-12-22	Male	175	70	22.9	Right	FIRST TEST	Erector Spin	Lateral	Sitting	Right	Relaxed	19.9	376	0.96	13.1	0.81	15	Fabio Valenti	000560	2024	1	2	5	Morning
7.32313e+18	2024-01-12 09:48:09	3			1982-12-22	Male	175	70	22.9	Right	FIRST TEST	Erector Spin	Lateral	Sitting	Right	Relaxed	19.9	379	0.95	13.1	0.81	15	Fabio Valenti	000560	2024	1	2	5	Morning
7.32313e+18	2024-01-12 09:48:10	4			1982-12-22	Male	175	70	22.9	Right	FIRST TEST	Erector Spin	Lateral	Sitting	Right	Relaxed	20	382	0.94	13.1	0.81	15	Fabio Valenti	000560	2024	1	2	5	Morning
7.32313e+18	2024-01-12 09:48:10	5			1982-12-22	Male	175	70	22.9	Right	FIRST TEST	Erector Spin	Lateral	Sitting	Right	Relaxed	20.2	384	0.92	13	0.8	15	Fabio Valenti	000560	2024	1	2	5	Morning
7.32314e+18	2024-01-12 10:15:33	1			1982-12-22	Male	175	70	22.9	Right	SECOND TESTING 30 min	Erector Spin	Lateral	Lying	Left	Relaxed	17.8	320	1.06	15.5	0.93	15	Fabio Valenti	000560	2024	1	2	5	Morning
7.32314e+18	2024-01-12 10:15:33	2			1982-12-22	Male	175	70	22.9	Right	SECOND TESTING 30 min	Erector Spin	Lateral	Lying	Left	Relaxed	17.6	325	1.05	15.5	0.93	15	Fabio Valenti	000560	2024	1	2	5	Morning
7.32314e+18	2024-01-12 10:15:34	3			1982-12-22	Male	175	70	22.9	Right	SECOND TESTING 30 min	Erector Spin	Lateral	Lying	Left	Relaxed	17.9	333	1.05	15.2	0.92	15	Fabio Valenti	000560	2024	1	2	5	Morning
7.32314e+18	2024-01-12 10:15:35	4			1982-12-22	Male	175	70	22.9	Right	SECOND TESTING 30 min	Erector Spin	Lateral	Lying	Left	Relaxed	17.9	335	1.04	15	0.91	15	Fabio Valenti	000560	2024	1	2	5	Morning
7.32314e+18	2024-01-12 10:15:35	5			1982-12-22	Male	175	70	22.9	Right	SECOND TESTING 30 min	Erector Spin	Lateral	Lying	Left	Relaxed	18.1	340	1.05	14.9	0.9	15	Fabio Valenti	000560	2024	1	2	5	Morning
7.32314e+18	2024-01-12 10:15:44	1			1982-12-22	Male	175	70	22.9	Right	SECOND TESTING 30 min	Erector Spin	Lateral	Lying	Right	Relaxed	17.4	295	1.05	16.3	0.97	15	Fabio Valenti	000560	2024	1	2	5	Morning
7.32314e+18	2024-01-12 10:15:45	2			1982-12-22	Male	175	70	22.9	Right	SECOND TESTING 30 min	Erector Spin	Lateral	Lying	Right	Relaxed	17.4	298	1.02	16	0.95	15	Fabio Valenti	000560	2024	1	2	5	Morning
7.32314e+18	2024-01-12 10:15:45	3			1982-12-22	Male	175	70	22.9	Right	SECOND TESTING 30 min	Erector Spin	Lateral	Lying	Right	Relaxed	17.4	300	1	16	0.95	15	Fabio Valenti	000560	2024	1	2	5	Morning
7.32314e+18	2024-01-12 10:15:46	4			1982-12-22	Male	175	70	22.9	Right	SECOND TESTING 30 min	Erector Spin	Lateral	Lying	Right	Relaxed	17.4	303	0.99	15.9	0.95	15	Fabio Valenti	000560	2024	1	2	5	Morning
7.32314e+18	2024-01-12 10:15:47	5			1982-12-22	Male	175	70	22.9	Right	SECOND TESTING 30 min	Erector Spin	Lateral	Lying	Right	Relaxed	17.6	307	0.98	15.7	0.94	15	Fabio Valenti	000560	2024	1	2	5	Morning
7.32314e+18	2024-01-12 10:16:08	1			1982-12-22	Male	175	70	22.9	Right	SECOND TESTING 30 min	Erector Spin	Lateral	Sitting	Left	Relaxed	21.6	442	0.79	10.9	0.67	15	Fabio Valenti	000560	2024	1	2	5	Morning
7.32314e+18	2024-01-12 10:16:09	2			1982-12-22	Male	175	70	22.9	Right	SECOND TESTING 30 min	Erector Spin	Lateral	Sitting	Left	Relaxed	21.5	443	0.81	10.9	0.67	15	Fabio Valenti	000560	2024	1	2	5	Morning
7.32314e+18	2024-01-12 10:16:10	3			1982-12-22	Male	175	70	22.9	Right	SECOND TESTING 30 min	Erector Spin	Lateral	Sitting	Left	Relaxed	21.3	430	0.81	11.2	0.68	15	Fabio Valenti	000560	2024	1	2	5	Morning
7.32314e+18	2024-01-12 10:16:10	4			1982-12-22	Male	175	70	22.9	Right	SECOND TESTING 30 min	Erector Spin	Lateral	Sitting	Left	Relaxed	21.4	434	0.8	11.2	0.69	15	Fabio Valenti	000560	2024	1	2	5	Morning
7.32314e+18	2024-01-12 10:16:11	5			1982-12-22	Male	175	70	22.9	Right	SECOND TESTING 30 min	Erector Spin	Lateral	Sitting	Left	Relaxed	21.1	417	0.82	11.7	0.71	15	Fabio Valenti	000560	2024	1	2	5	Morning
7.32314e+18	2024-01-12 10:16:23	1			1982-12-22	Male	175	70	22.9	Right	SECOND TESTING 30 min	Erector Spin	Lateral	Sitting	Right	Relaxed	23.5	516	1.06	9.7	0.61	15	Fabio Valenti	000560	2024	1	2	5	Morning
7.32314e+18	2024-01-12 10:16:23	2			1982-12-22	Male	175	70	22.9	Right	SECOND TESTING 30 min	Erector Spin	Lateral	Sitting	Right	Relaxed	23.4	513	1.06	9.8	0.62	15	Fabio Valenti	000560	2024	1	2	5	Morning
7.32314e+18	2024-01-12 10:16:24	3			1982-12-22	Male	175	70	22.9	Right	SECOND TESTING 30 min	Erector Spin	Lateral	Sitting	Right	Relaxed	23.6	513	1.01	9.7	0.61	15	Fabio Valenti	000560	2024	1	2	5	Morning
7.32314e+18	2024-01-12 10:16:25	4			1982-12-22	Male	175	70	22.9	Right	SECOND TESTING 30 min	Erector Spin	Lateral	Sitting	Right	Relaxed	23.3	506	1.07	9.9	0.62	15	Fabio Valenti	000560	2024	1	2	5	Morning
7.32314e+18	2024-01-12 10:16:26	5			1982-12-22	Male	175	70	22.9	Right	SECOND TESTING 30 min	Erector Spin	Lateral	Sitting	Right	Relaxed	23.2	503	1.08	10	0.63	15	Fabio Valenti	000560	2024	1	2	5	Morning
7.3235e+18	2024-01-13 09:37:41	1			1982-12-22	Male	175	70	22.9	Right	THIRD TEST 24h	Erector Spin	Lateral	Lying	Left	Relaxed	17	321	1.01	15.5	0.94	15	Fabio Valenti	000560	2024	1	2	6	Morning
7.3235e+18	2024-01-13 09:37:43	2			1982-12-22	Male	175	70	22.9	Right	THIRD TEST 24h	Erector Spin	Lateral	Lying	Left	Relaxed	17.1	324	1.01	15.4	0.94	15	Fabio Valenti	000560	2024	1	2	6	Morning
7.3235e+18	2024-01-13 09:37:44	3			1982-12-22	Male	175	70	22.9	Right	THIRD TEST 24h	Erector Spin	Lateral	Lying	Left	Relaxed	17	323	1.03	15.5	0.94	15	Fabio Valenti	000560	2024	1	2	6	Morning
7.3235e+18	2024-01-13 09:37:44	4			1982-12-22	Male	175	70	22.9	Right	THIRD TEST 24h	Erector Spin	Lateral	Lying	Left	Relaxed	17	326	1.03	15.4	0.94	15	Fabio Valenti	000560	2024	1	2	6	Morning
7.3235e+18	2024-01-13 09:37:45	5			1982-12-22	Male	175	70	22.9	Right	THIRD TEST 24h	Erector Spin	Lateral	Lying	Left	Relaxed	17	325	1.05	15.5	0.94	15	Fabio Valenti	000560	2024	1	2	6	Morning
7.3235e+18	2024-01-13 09:38:05	1			1982-12-22	Male	175	70	22.9	Right	THIRD TEST 24h	Erector Spin	Lateral	Lying	Right	Relaxed	17.2	313	0.88	16.5	1.01	15	Fabio Valenti	000560	2024	1	2	6	Morning
7.3235e+18	2024-01-13 09:38:08	2			1982-12-22	Male	175	70	22.9	Right	THIRD TEST 24h	Erector Spin	Lateral	Lying	Right	Relaxed	17.5	320	0.89	16.2	0.99	15	Fabio Valenti	000560	2024	1	2	6	Morning
7.3235e+18	2024-01-13 09:38:09	3			1982-12-22	Male	175	70	22.9	Right	THIRD TEST 24h	Erector Spin	Lateral	Lying	Right	Relaxed	17.5	322	0.89	16.2	0.99	15	Fabio Valenti	000560	2024	1	2	6	Morning
7.3235e+18	2024-01-13 09:38:09	4			1982-12-22	Male	175	70	22.9	Right	THIRD TEST 24h	Erector Spin	Lateral	Lying	Right	Relaxed	17.5	322	0.92	16.2	0.99	15	Fabio Valenti	000560	2024	1	2	6	Morning
7.3235e+18	2024-01-13 09:38:10	5			1982-12-22	Male	175	70	22.9	Right	THIRD TEST 24h	Erector Spin	Lateral	Lying	Right	Relaxed	17.5	323	0.91	16.2	0.99	15	Fabio Valenti	000560	2024	1	2	6	Morning
7.3235e+18	2024-01-13 09:39:25	1			1982-12-22	Male	175	70	22.9	Right	THIRD TEST 24h	Erector Spin	Lateral	Sitting	Left	Relaxed	21	401	0.9	12.2	0.74	15	Fabio Valenti	000560	2024	1	2	6	Morning
7.3235e+18	2024-01-13 09:39:25	2			1982-12-22	Male	175	70	22.9	Right	THIRD TEST 24h	Erector Spin	Lateral	Sitting	Left	Relaxed	20.8	394	0.9	12.3	0.75	15	Fabio Valenti	000560	2024	1	2	6	Morning
7.3235e+18	2024-01-13 09:39:26	3			1982-12-22	Male	175	70	22.9	Right	THIRD TEST 24h	Erector Spin	Lateral	Sitting	Left	Relaxed	21.1	398	0.86	12.2	0.74	15	Fabio Valenti	000560	2024	1	2	6	Morning
7.3235e+18	2024-01-13 09:39:27	4			1982-12-22	Male	175	70	22.9	Right	THIRD TEST 24h	Erector Spin	Lateral	Sitting	Left	Relaxed	21.4	406	0.88	12	0.73	15	Fabio Valenti	000560	2024	1	2	6	Morning
7.3235e+18	2024-01-13 09:39:28	5			1982-12-22	Male	175	70	22.9	Right	THIRD TEST 24h	Erector Spin	Lateral	Sitting	Left	Relaxed	21.4	416	0.9	11.8	0.72	15	Fabio Valenti	000560	2024	1	2	6	Morning
7.3235e+18	2024-01-13 09:39:56	1			1982-12-22	Male	175	70	22.9	Right	THIRD TEST 24h	Erector Spin	Lateral	Sitting	Right	Relaxed	21.9	418	0.92	11.8	0.73	15	Fabio Valenti	000560	2024	1	2	6	Morning
7.3235e+18	2024-01-13 09:39:57	2			1982-12-22	Male	175	70	22.9	Right	THIRD TEST 24h	Erector Spin	Lateral	Sitting	Right	Relaxed	22	419	0.89	11.8	0.73	15	Fabio Valenti	000560	2024	1	2	6	Morning
7.3235e+18	2024-01-13 09:39:58	3			1982-12-22	Male	175	70	22.9	Right	THIRD TEST 24h	Erector Spin	Lateral	Sitting	Right	Relaxed	22	410	0.9	11.8	0.72	15	Fabio Valenti	000560	2024	1	2	6	Morning
7.3235e+18	2024-01-13 09:39:59	4			1982-12-22	Male	175	70	22.9	Right	THIRD TEST 24h	Erector Spin	Lateral	Sitting	Right	Relaxed	22	413	0.91	11.9	0.73	15	Fabio Valenti	000560	2024	1	2	6	Morning
7.3235e+18	2024-01-13 09:40:00	5			1982-12-22	Male	175	70	22.9	Right	THIRD TEST 24h	Erector Spin	Lateral	Sitting	Right	Relaxed	22	410	0.91	11.9	0.73	15	Fabio Valenti	000560	2024	1	2	6	Morning
7.32986e+18	2024-01-30 12:43:19	1			1988-08-09	Male	185	85	24.8	Right	FIRST TEST	Erector Spin	Lateral	Lying	Left	Relaxed	12.4	229	1.8	27.9	1.73	15	Fabio Valenti	000560	2024	1	5	2	Day
7.32986e+18	2024-01-30 12:43:20	2			1988-08-09	Male	185	85	24.8	Right	FIRST TEST	Erector Spin	Lateral	Lying	Left	Relaxed	12.2	232	1.81	27.9	1.74	15	Fabio Valenti	000560	2024	1	5	2	Day
7.32986e+18	2024-01-30 12:43:21	3			1988-08-09	Male	185	85	24.8	Right	FIRST TEST	Erector Spin	Lateral	Lying	Left	Relaxed	12.6	234	1.82	27.7	1.72	15	Fabio Valenti	000560	2024	1	5	2	Day
7.32986e+18	2024-01-30 12:43:23	4			1988-08-09	Male	185	85	24.8	Right	FIRST TEST	Erector Spin	Lateral	Lying	Left	Relaxed	12.8	242	1.81	27	1.69	15	Fabio Valenti	000560	2024	1	5	2	Day
7.32986e+18	2024-01-30 12:43:24	5			1988-08-09	Male	185	85	24.8	Right	FIRST TEST	Erector Spin	Lateral	Lying	Left	Relaxed	12.6	243	1.81	27.1	1.7	15	Fabio Valenti	000560	2024	1	5	2	Day
7.32986e+18	2024-01-30 12:43:52	1			1988-08-09	Male	185	85	24.8	Right	FIRST TEST	Erector Spin	Lateral	Lying	Right	Relaxed	12.4	261	2.42	24.7	1.55	15	Fabio Valenti	000560	2024	1	5	2	Day
7.32986e+18	2024-01-30 12:43:53	2			1988-08-09	Male	185	85	24.8	Right	FIRST TEST	Erector Spin	Lateral	Lying	Right	Relaxed	12.4	265	2.47	24.3	1.53	15	Fabio Valenti	000560	2024	1	5	2	Day
7.32986e+18	2024-01-30 12:43:53	3			1988-08-09	Male	185	85	24.8	Right	FIRST TEST	Erector Spin	Lateral	Lying	Right	Relaxed	12.9	266	2.45	24.2	1.52	15	Fabio Valenti	000560	2024	1	5	2	Day
7.32986e+18	2024-01-30 12:43:54	4			1988-08-09	Male	185	85	24.8	Right	FIRST TEST	Erector Spin	Lateral	Lying	Right	Relaxed	12.8	269	2.49	24.1	1.52	15	Fabio Valenti	000560	2024	1	5	2	Day
7.32986e+18	2024-01-30 12:43:55	5			1988-08-09	Male	185	85	24.8	Right	FIRST TEST	Erector Spin	Lateral	Lying	Right	Relaxed	12.3	267	2.49	24	1.51	15	Fabio Valenti	000560	2024	1	5	2	Day
7.32986e+18	2024-01-30 12:44:35	1			1988-08-09	Male	185	85	24.8	Right	FIRST TEST	Erector Spin	Lateral	Sitting	Left	Relaxed	13.4	275	2.59	23.2	1.46	15	Fabio Valenti	000560	2024	1	5	2	Day
7.32986e+18	2024-01-30 12:44:35	2			1988-08-09	Male	185	85	24.8	Right	FIRST TEST	Erector Spin	Lateral	Sitting	Left	Relaxed	13.4	272	2.52	23.2	1.47	15	Fabio Valenti	000560	2024	1	5	2	Day
7.32986e+18	2024-01-30 12:44:36	3			1988-08-09	Male	185	85	24.8	Right	FIRST TEST	Erector Spin	Lateral	Sitting	Left	Relaxed	13.3	274	2.51	23	1.45	15	Fabio Valenti	000560	2024	1	5	2	Day
7.32986e+18	2024-01-30 12:44:37	4			1988-08-09	Male	185	85	24.8	Right	FIRST TEST	Erector Spin	Lateral	Sitting	Left	Relaxed	13.4	274	2.53	22.8	1.44	15	Fabio Valenti	000560	2024	1	5	2	Day
7.32986e+18	2024-01-30 12:44:39	5			1988-08-09	Male	185	85	24.8	Right	FIRST TEST	Erector Spin	Lateral	Sitting	Left	Relaxed	13.5	280	2.58	22.7	1.43	15	Fabio Valenti	000560	2024	1	5	2	Day
7.32986e+18	2024-01-30 12:45:34	1			1988-08-09	Male	185	85	24.8	Right	FIRST TEST	Erector Spin	Lateral	Sitting	Right	Relaxed	14.9	301	2.6	19.6	1.24	15	Fabio Valenti	000560	2024	1	5	2	Day
7.32986e+18	2024-01-30 12:45:35	2			1988-08-09	Male	185	85	24.8	Right	FIRST TEST	Erector Spin	Lateral	Sitting	Right	Relaxed	14.6	302	2.55	19.4	1.22	15	Fabio Valenti	000560	2024	1	5	2	Day
7.32986e+18	2024-01-30 12:45:35	3			1988-08-09	Male	185	85	24.8	Right	FIRST TEST	Erector Spin	Lateral	Sitting	Right	Relaxed	14.3	303	2.64	19.5	1.23	15	Fabio Valenti	000560	2024	1	5	2	Day
7.32986e+18	2024-01-30 12:45:36	4			1988-08-09	Male	185	85	24.8	Right	FIRST TEST	Erector Spin	Lateral	Sitting	Right	Relaxed	14.6	305	2.65	19.3	1.22	15	Fabio Valenti	000560	2024	1	5	2	Day
7.32986e+18	2024-01-30 12:45:37	5			1988-08-09	Male	185	85	24.8	Right	FIRST TEST	Erector Spin	Lateral	Sitting	Right	Relaxed	14.6	303	2.62	19.5	1.23	15	Fabio Valenti	000560	2024	1	5	2	Day
7.32986e+18	2024-01-30 13:13:16	1			1988-08-09	Male	185	85	24.8	Right	SECOND TESTING 30 min	Erector Spin	Lateral	Lying	Left	Relaxed	12.4	229	1.85	28.9	1.79	15	Fabio Valenti	000560	2024	1	5	2	Day
7.32986e+18	2024-01-30 13:13:17	2			1988-08-09	Male	185	85	24.8	Right	SECOND TESTING 30 min	Erector Spin	Lateral	Lying	Left	Relaxed	12.3	234	1.88	28.9	1.8	15	Fabio Valenti	000560	2024	1	5	2	Day
7.32986e+18	2024-01-30 13:13:18	3			1988-08-09	Male	185	85	24.8	Right	SECOND TESTING 30 min	Erector Spin	Lateral	Lying	Left	Relaxed	12.4	233	1.89	28.7	1.78	15	Fabio Valenti	000560	2024	1	5	2	Day
7.32986e+18	2024-01-30 13:13:18	4			1988-08-09	Male	185	85	24.8	Right	SECOND TESTING 30 min	Erector Spin	Lateral	Lying	Left	Relaxed	12.6	232	1.94	28.9	1.79	15	Fabio Valenti	000560	2024	1	5	2	Day
7.32986e+18	2024-01-30 13:13:19	5			1988-08-09	Male	185	85	24.8	Right	SECOND TESTING 30 min	Erector Spin	Lateral	Lying	Left	Relaxed	12.6	235	1.9	28.5	1.77	15	Fabio Valenti	000560	2024	1	5	2	Day
7.32986e+18	2024-01-30 13:13:32	1			1988-08-09	Male	185	85	24.8	Right	SECOND TESTING 30 min	Erector Spin	Lateral	Lying	Right	Relaxed	12.4	260	2.38	24.7	1.55	15	Fabio Valenti	000560	2024	1	5	2	Day
7.32986e+18	2024-01-30 13:13:32	2			1988-08-09	Male	185	85	24.8	Right	SECOND TESTING 30 min	Erector Spin	Lateral	Lying	Right	Relaxed	12.6	268	2.44	23.9	1.5	15	Fabio Valenti	000560	2024	1	5	2	Day
7.32986e+18	2024-01-30 13:13:33	3			1988-08-09	Male	185	85	24.8	Right	SECOND TESTING 30 min	Erector Spin	Lateral	Lying	Right	Relaxed	12.6	269	2.45	23.8	1.5	15	Fabio Valenti	000560	2024	1	5	2	Day
7.32986e+18	2024-01-30 13:13:34	4			1988-08-09	Male	185	85	24.8	Right	SECOND TESTING 30 min	Erector Spin	Lateral	Lying	Right	Relaxed	12.6	271	2.48	23.6	1.49	15	Fabio Valenti	000560	2024	1	5	2	Day
7.32986e+18	2024-01-30 13:13:34	5			1988-08-09	Male	185	85	24.8	Right	SECOND TESTING 30 min	Erector Spin	Lateral	Lying	Right	Relaxed	12.7	270	2.44	23.6	1.48	15	Fabio Valenti	000560	2024	1	5	2	Day
7.32986e+18	2024-01-30 13:14:08	1			1988-08-09	Male	185	85	24.8	Right	SECOND TESTING 30 min	Erector Spin	Lateral	Sitting	Left	Relaxed	13.2	266	2.55	24.6	1.55	15	Fabio Valenti	000560	2024	1	5	2	Day
7.32986e+18	2024-01-30 13:14:08	2			1988-08-09	Male	185	85	24.8	Right	SECOND TESTING 30 min	Erector Spin	Lateral	Sitting	Left	Relaxed	13.3	269	2.58	24.4	1.53	15	Fabio Valenti	000560	2024	1	5	2	Day
7.32986e+18	2024-01-30 13:14:09	3			1988-08-09	Male	185	85	24.8	Right	SECOND TESTING 30 min	Erector Spin	Lateral	Sitting	Left	Relaxed	13.3	271	2.55	24.5	1.55	15	Fabio Valenti	000560	2024	1	5	2	Day
7.32986e+18	2024-01-30 13:14:10	4			1988-08-09	Male	185	85	24.8	Right	SECOND TESTING 30 min	Erector Spin	Lateral	Sitting	Left	Relaxed	13.3	270	2.54	24.6	1.55	15	Fabio Valenti	000560	2024	1	5	2	Day
7.32986e+18	2024-01-30 13:14:10	5			1988-08-09	Male	185	85	24.8	Right	SECOND TESTING 30 min	Erector Spin	Lateral	Sitting	Left	Relaxed	13.3	272	2.54	24.5	1.55	15	Fabio Valenti	000560	2024	1	5	2	Day
7.32986e+18	2024-01-30 13:14:18	1			1988-08-09	Male	185	85	24.8	Right	SECOND TESTING 30 min	Erector Spin	Lateral	Sitting	Right	Relaxed	15.3	294	2.79	20.9	1.32	15	Fabio Valenti	000560	2024	1	5	2	Day
7.32986e+18	2024-01-30 13:14:19	2			1988-08-09	Male	185	85	24.8	Right	SECOND TESTING 30 min	Erector Spin	Lateral	Sitting	Right	Relaxed	14.8	296	2.8	20.8	1.3	15	Fabio Valenti	000560	2024	1	5	2	Day
7.32986e+18	2024-01-30 13:14:20	3			1988-08-09	Male	185	85	24.8	Right	SECOND TESTING 30 min	Erector Spin	Lateral	Sitting	Right	Relaxed	15.6	295	2.7	20.5	1.3	15	Fabio Valenti	000560	2024	1	5	2	Day
7.32986e+18	2024-01-30 13:14:20	4			1988-08-09	Male	185	85	24.8	Right	SECOND TESTING 30 min	Erector Spin	Lateral	Sitting	Right	Relaxed	15.6	300	2.74	20.1	1.28	15	Fabio Valenti	000560	2024	1	5	2	Day
7.32986e+18	2024-01-30 13:14:21	5			1988-08-09	Male	185	85	24.8	Right	SECOND TESTING 30 min	Erector Spin	Lateral	Sitting	Right	Relaxed	15.7	309	2.65	20	1.27	15	Fabio Valenti	000560	2024	1	5	2	Day
7.33023e+18	2024-01-31 12:41:24	1			1988-08-09	Male	185	85	24.8	Right	THIRD TEST 24h	Erector Spin	Lateral	Lying	Left	Relaxed	13.5	226	1.33	25.5	1.58	15	Fabio Valenti	000560	2024	1	5	3	Day
7.33023e+18	2024-01-31 12:41:24	2			1988-08-09	Male	185	85	24.8	Right	THIRD TEST 24h	Erector Spin	Lateral	Lying	Left	Relaxed	13.6	233	1.36	25.2	1.55	15	Fabio Valenti	000560	2024	1	5	3	Day
7.33023e+18	2024-01-31 12:41:25	3			1988-08-09	Male	185	85	24.8	Right	THIRD TEST 24h	Erector Spin	Lateral	Lying	Left	Relaxed	13.5	232	1.33	25.4	1.57	15	Fabio Valenti	000560	2024	1	5	3	Day
7.33023e+18	2024-01-31 12:41:26	4			1988-08-09	Male	185	85	24.8	Right	THIRD TEST 24h	Erector Spin	Lateral	Lying	Left	Relaxed	13.5	232	1.35	25.5	1.58	15	Fabio Valenti	000560	2024	1	5	3	Day
7.33023e+18	2024-01-31 12:41:27	5			1988-08-09	Male	185	85	24.8	Right	THIRD TEST 24h	Erector Spin	Lateral	Lying	Left	Relaxed	13.6	232	1.37	25.3	1.56	15	Fabio Valenti	000560	2024	1	5	3	Day
7.33023e+18	2024-01-31 12:41:40	1			1988-08-09	Male	185	85	24.8	Right	THIRD TEST 24h	Erector Spin	Lateral	Lying	Right	Relaxed	13.9	263	1.74	23.6	1.48	15	Fabio Valenti	000560	2024	1	5	3	Day
7.33023e+18	2024-01-31 12:41:40	2			1988-08-09	Male	185	85	24.8	Right	THIRD TEST 24h	Erector Spin	Lateral	Lying	Right	Relaxed	13.7	265	1.73	23.5	1.48	15	Fabio Valenti	000560	2024	1	5	3	Day
7.33023e+18	2024-01-31 12:41:41	3			1988-08-09	Male	185	85	24.8	Right	THIRD TEST 24h	Erector Spin	Lateral	Lying	Right	Relaxed	13.8	266	1.74	23.6	1.49	15	Fabio Valenti	000560	2024	1	5	3	Day
7.33023e+18	2024-01-31 12:41:42	4			1988-08-09	Male	185	85	24.8	Right	THIRD TEST 24h	Erector Spin	Lateral	Lying	Right	Relaxed	13.8	266	1.72	23.6	1.49	15	Fabio Valenti	000560	2024	1	5	3	Day
7.33023e+18	2024-01-31 12:41:42	5			1988-08-09	Male	185	85	24.8	Right	THIRD TEST 24h	Erector Spin	Lateral	Lying	Right	Relaxed	13.8	266	1.75	23.4	1.47	15	Fabio Valenti	000560	2024	1	5	3	Day
7.33023e+18	2024-01-31 12:42:04	1			1988-08-09	Male	185	85	24.8	Right	THIRD TEST 24h	Erector Spin	Lateral	Sitting	Left	Relaxed	14.1	278	2.84	25.1	1.6	15	Fabio Valenti	000560	2024	1	5	3	Day
7.33023e+18	2024-01-31 12:42:05	2			1988-08-09	Male	185	85	24.8	Right	THIRD TEST 24h	Erector Spin	Lateral	Sitting	Left	Relaxed	14	281	2.89	25	1.59	15	Fabio Valenti	000560	2024	1	5	3	Day
7.33023e+18	2024-01-31 12:42:06	3			1988-08-09	Male	185	85	24.8	Right	THIRD TEST 24h	Erector Spin	Lateral	Sitting	Left	Relaxed	14	281	2.85	25.4	1.62	15	Fabio Valenti	000560	2024	1	5	3	Day
7.33023e+18	2024-01-31 12:42:07	4			1988-08-09	Male	185	85	24.8	Right	THIRD TEST 24h	Erector Spin	Lateral	Sitting	Left	Relaxed	14.2	282	2.93	25.1	1.6	15	Fabio Valenti	000560	2024	1	5	3	Day
7.33023e+18	2024-01-31 12:42:07	5			1988-08-09	Male	185	85	24.8	Right	THIRD TEST 24h	Erector Spin	Lateral	Sitting	Left	Relaxed	14.3	282	2.75	25	1.59	15	Fabio Valenti	000560	2024	1	5	3	Day
7.33023e+18	2024-01-31 12:42:20	1			1988-08-09	Male	185	85	24.8	Right	THIRD TEST 24h	Erector Spin	Lateral	Sitting	Right	Relaxed	16.2	283	2.65	24.2	1.54	15	Fabio Valenti	000560	2024	1	5	3	Day
7.33023e+18	2024-01-31 12:42:21	2			1988-08-09	Male	185	85	24.8	Right	THIRD TEST 24h	Erector Spin	Lateral	Sitting	Right	Relaxed	16	285	2.66	24.6	1.56	15	Fabio Valenti	000560	2024	1	5	3	Day
7.33023e+18	2024-01-31 12:42:22	3			1988-08-09	Male	185	85	24.8	Right	THIRD TEST 24h	Erector Spin	Lateral	Sitting	Right	Relaxed	15.9	288	2.7	24.3	1.55	15	Fabio Valenti	000560	2024	1	5	3	Day
7.33023e+18	2024-01-31 12:42:23	4			1988-08-09	Male	185	85	24.8	Right	THIRD TEST 24h	Erector Spin	Lateral	Sitting	Right	Relaxed	16	288	2.81	24.7	1.57	15	Fabio Valenti	000560	2024	1	5	3	Day
7.33023e+18	2024-01-31 12:42:23	5			1988-08-09	Male	185	85	24.8	Right	THIRD TEST 24h	Erector Spin	Lateral	Sitting	Right	Relaxed	16.2	290	2.69	24.1	1.54	15	Fabio Valenti	000560	2024	1	5	3	Day
7.32426e+18	2024-01-15 11:07:17	1			1993-05-11	Female	165	51	18.7	Right	FIRST TEST	Erector Spin	Lateral	Lying	Left	Relaxed	14	252	1.08	20.5	1.24	15	Fabio Valenti	000560	2024	1	3	1	Morning
7.32426e+18	2024-01-15 11:07:20	2			1993-05-11	Female	165	51	18.7	Right	FIRST TEST	Erector Spin	Lateral	Lying	Left	Relaxed	13.8	250	1.07	20.5	1.23	15	Fabio Valenti	000560	2024	1	3	1	Morning
7.32426e+18	2024-01-15 11:07:21	3			1993-05-11	Female	165	51	18.7	Right	FIRST TEST	Erector Spin	Lateral	Lying	Left	Relaxed	13.8	254	1.09	20.4	1.23	15	Fabio Valenti	000560	2024	1	3	1	Morning
7.32426e+18	2024-01-15 11:07:22	4			1993-05-11	Female	165	51	18.7	Right	FIRST TEST	Erector Spin	Lateral	Lying	Left	Relaxed	13.8	251	1.06	20.4	1.23	15	Fabio Valenti	000560	2024	1	3	1	Morning
7.32426e+18	2024-01-15 11:07:24	5			1993-05-11	Female	165	51	18.7	Right	FIRST TEST	Erector Spin	Lateral	Lying	Left	Relaxed	13.6	239	1.06	20.8	1.24	15	Fabio Valenti	000560	2024	1	3	1	Morning
7.32426e+18	2024-01-15 11:08:13	1			1993-05-11	Female	165	51	18.7	Right	FIRST TEST	Erector Spin	Lateral	Lying	Right	Relaxed	15	285	1.02	18.7	1.16	15	Fabio Valenti	000560	2024	1	3	1	Morning
7.32426e+18	2024-01-15 11:08:14	2			1993-05-11	Female	165	51	18.7	Right	FIRST TEST	Erector Spin	Lateral	Lying	Right	Relaxed	14.9	285	1.01	18.8	1.17	15	Fabio Valenti	000560	2024	1	3	1	Morning
7.32426e+18	2024-01-15 11:08:14	3			1993-05-11	Female	165	51	18.7	Right	FIRST TEST	Erector Spin	Lateral	Lying	Right	Relaxed	14.8	282	1.01	19	1.18	15	Fabio Valenti	000560	2024	1	3	1	Morning
7.32426e+18	2024-01-15 11:08:15	4			1993-05-11	Female	165	51	18.7	Right	FIRST TEST	Erector Spin	Lateral	Lying	Right	Relaxed	14.7	281	1	19.3	1.2	15	Fabio Valenti	000560	2024	1	3	1	Morning
7.32426e+18	2024-01-15 11:08:16	5			1993-05-11	Female	165	51	18.7	Right	FIRST TEST	Erector Spin	Lateral	Lying	Right	Relaxed	14.7	281	0.99	19.2	1.19	15	Fabio Valenti	000560	2024	1	3	1	Morning
7.32426e+18	2024-01-15 11:08:40	1			1993-05-11	Female	165	51	18.7	Right	FIRST TEST	Erector Spin	Lateral	Sitting	Left	Relaxed	17.7	420	1.03	12.3	0.78	15	Fabio Valenti	000560	2024	1	3	1	Morning
7.32426e+18	2024-01-15 11:08:41	2			1993-05-11	Female	165	51	18.7	Right	FIRST TEST	Erector Spin	Lateral	Sitting	Left	Relaxed	17.6	429	1.03	12.1	0.77	15	Fabio Valenti	000560	2024	1	3	1	Morning
7.32426e+18	2024-01-15 11:08:42	3			1993-05-11	Female	165	51	18.7	Right	FIRST TEST	Erector Spin	Lateral	Sitting	Left	Relaxed	17.6	433	1.02	12.1	0.77	15	Fabio Valenti	000560	2024	1	3	1	Morning
7.32426e+18	2024-01-15 11:08:44	4			1993-05-11	Female	165	51	18.7	Right	FIRST TEST	Erector Spin	Lateral	Sitting	Left	Relaxed	17.5	434	1	12.1	0.78	15	Fabio Valenti	000560	2024	1	3	1	Morning
7.32426e+18	2024-01-15 11:08:45	5			1993-05-11	Female	165	51	18.7	Right	FIRST TEST	Erector Spin	Lateral	Sitting	Left	Relaxed	17.4	432	1	12.1	0.78	15	Fabio Valenti	000560	2024	1	3	1	Morning
7.32426e+18	2024-01-15 11:08:52	1			1993-05-11	Female	165	51	18.7	Right	FIRST TEST	Erector Spin	Lateral	Sitting	Right	Relaxed	22.6	636	0.94	8.1	0.53	15	Fabio Valenti	000560	2024	1	3	1	Morning
7.32426e+18	2024-01-15 11:08:53	2			1993-05-11	Female	165	51	18.7	Right	FIRST TEST	Erector Spin	Lateral	Sitting	Right	Relaxed	22.2	634	0.92	8.2	0.54	15	Fabio Valenti	000560	2024	1	3	1	Morning
7.32427e+18	2024-01-15 11:08:54	3			1993-05-11	Female	165	51	18.7	Right	FIRST TEST	Erector Spin	Lateral	Sitting	Right	Relaxed	22.3	639	0.93	8.1	0.55	15	Fabio Valenti	000560	2024	1	3	1	Morning
7.32427e+18	2024-01-15 11:08:54	4			1993-05-11	Female	165	51	18.7	Right	FIRST TEST	Erector Spin	Lateral	Sitting	Right	Relaxed	22.1	640	0.93	8.1	0.55	15	Fabio Valenti	000560	2024	1	3	1	Morning
7.32427e+18	2024-01-15 11:08:55	5			1993-05-11	Female	165	51	18.7	Right	FIRST TEST	Erector Spin	Lateral	Sitting	Right	Relaxed	22.3	640	0.92	8.1	0.54	15	Fabio Valenti	000560	2024	1	3	1	Morning
7.32427e+18	2024-01-15 11:34:26	1			1993-05-11	Female	165	51	18.7	Right	SECOND TESTING 30 min	Erector Spin	Lateral	Lying	Left	Relaxed	14.4	282	1.2	19.2	1.18	15	Fabio Valenti	000560	2024	1	3	1	Morning
7.32427e+18	2024-01-15 11:34:27	2			1993-05-11	Female	165	51	18.7	Right	SECOND TESTING 30 min	Erector Spin	Lateral	Lying	Left	Relaxed	14.4	285	1.17	19	1.17	15	Fabio Valenti	000560	2024	1	3	1	Morning
7.32427e+18	2024-01-15 11:34:28	3			1993-05-11	Female	165	51	18.7	Right	SECOND TESTING 30 min	Erector Spin	Lateral	Lying	Left	Relaxed	14.3	284	1.16	19.1	1.17	15	Fabio Valenti	000560	2024	1	3	1	Morning
7.32427e+18	2024-01-15 11:34:29	4			1993-05-11	Female	165	51	18.7	Right	SECOND TESTING 30 min	Erector Spin	Lateral	Lying	Left	Relaxed	14.5	289	1.14	18.9	1.16	15	Fabio Valenti	000560	2024	1	3	1	Morning
7.32427e+18	2024-01-15 11:34:29	5			1993-05-11	Female	165	51	18.7	Right	SECOND TESTING 30 min	Erector Spin	Lateral	Lying	Left	Relaxed	14.4	290	1.13	18.6	1.14	15	Fabio Valenti	000560	2024	1	3	1	Morning
7.32427e+18	2024-01-15 11:34:45	1			1993-05-11	Female	165	51	18.7	Right	SECOND TESTING 30 min	Erector Spin	Lateral	Lying	Right	Relaxed	15.5	313	1.26	18	1.13	15	Fabio Valenti	000560	2024	1	3	1	Morning
7.32427e+18	2024-01-15 11:34:46	2			1993-05-11	Female	165	51	18.7	Right	SECOND TESTING 30 min	Erector Spin	Lateral	Lying	Right	Relaxed	15.5	316	1.24	17.8	1.12	15	Fabio Valenti	000560	2024	1	3	1	Morning
7.32427e+18	2024-01-15 11:34:47	3			1993-05-11	Female	165	51	18.7	Right	SECOND TESTING 30 min	Erector Spin	Lateral	Lying	Right	Relaxed	15.5	320	1.23	17.7	1.11	15	Fabio Valenti	000560	2024	1	3	1	Morning
7.32427e+18	2024-01-15 11:34:47	4			1993-05-11	Female	165	51	18.7	Right	SECOND TESTING 30 min	Erector Spin	Lateral	Lying	Right	Relaxed	15.5	323	1.23	17.5	1.1	15	Fabio Valenti	000560	2024	1	3	1	Morning
7.32427e+18	2024-01-15 11:34:48	5			1993-05-11	Female	165	51	18.7	Right	SECOND TESTING 30 min	Erector Spin	Lateral	Lying	Right	Relaxed	15.5	323	1.23	17.5	1.1	15	Fabio Valenti	000560	2024	1	3	1	Morning
7.32427e+18	2024-01-15 11:35:29	1			1993-05-11	Female	165	51	18.7	Right	SECOND TESTING 30 min	Erector Spin	Lateral	Sitting	Left	Relaxed	18.9	489	0.99	10.9	0.7	15	Fabio Valenti	000560	2024	1	3	1	Morning
7.32427e+18	2024-01-15 11:35:29	2			1993-05-11	Female	165	51	18.7	Right	SECOND TESTING 30 min	Erector Spin	Lateral	Sitting	Left	Relaxed	18.8	491	0.96	10.9	0.7	15	Fabio Valenti	000560	2024	1	3	1	Morning
7.32427e+18	2024-01-15 11:35:30	3			1993-05-11	Female	165	51	18.7	Right	SECOND TESTING 30 min	Erector Spin	Lateral	Sitting	Left	Relaxed	18.6	491	0.95	10.9	0.7	15	Fabio Valenti	000560	2024	1	3	1	Morning
7.32427e+18	2024-01-15 11:35:31	4			1993-05-11	Female	165	51	18.7	Right	SECOND TESTING 30 min	Erector Spin	Lateral	Sitting	Left	Relaxed	18.5	490	0.96	11	0.7	15	Fabio Valenti	000560	2024	1	3	1	Morning
7.32427e+18	2024-01-15 11:35:32	5			1993-05-11	Female	165	51	18.7	Right	SECOND TESTING 30 min	Erector Spin	Lateral	Sitting	Left	Relaxed	18.6	493	0.94	10.9	0.7	15	Fabio Valenti	000560	2024	1	3	1	Morning
7.32427e+18	2024-01-15 11:35:38	1			1993-05-11	Female	165	51	18.7	Right	SECOND TESTING 30 min	Erector Spin	Lateral	Sitting	Right	Relaxed	23.1	668	0.85	7.8	0.52	15	Fabio Valenti	000560	2024	1	3	1	Morning
7.32427e+18	2024-01-15 11:35:38	2			1993-05-11	Female	165	51	18.7	Right	SECOND TESTING 30 min	Erector Spin	Lateral	Sitting	Right	Relaxed	23	676	0.89	7.7	0.51	15	Fabio Valenti	000560	2024	1	3	1	Morning
7.32427e+18	2024-01-15 11:35:39	3			1993-05-11	Female	165	51	18.7	Right	SECOND TESTING 30 min	Erector Spin	Lateral	Sitting	Right	Relaxed	22.9	676	0.89	7.7	0.51	15	Fabio Valenti	000560	2024	1	3	1	Morning
7.32427e+18	2024-01-15 11:35:40	4			1993-05-11	Female	165	51	18.7	Right	SECOND TESTING 30 min	Erector Spin	Lateral	Sitting	Right	Relaxed	22.9	677	0.87	7.6	0.51	15	Fabio Valenti	000560	2024	1	3	1	Morning
7.32427e+18	2024-01-15 11:35:41	5			1993-05-11	Female	165	51	18.7	Right	SECOND TESTING 30 min	Erector Spin	Lateral	Sitting	Right	Relaxed	23	681	0.86	7.5	0.51	15	Fabio Valenti	000560	2024	1	3	1	Morning
7.32463e+18	2024-01-16 11:04:26	1			1993-05-11	Female	165	51	18.7	Right	THIRD TEST 24h	Erector Spin	Lateral	Lying	Left	Relaxed	14.2	275	1.12	19	1.15	15	Fabio Valenti	000560	2024	1	3	2	Morning
7.32463e+18	2024-01-16 11:04:27	2			1993-05-11	Female	165	51	18.7	Right	THIRD TEST 24h	Erector Spin	Lateral	Lying	Left	Relaxed	14.1	277	1.12	19.1	1.16	15	Fabio Valenti	000560	2024	1	3	2	Morning
7.32463e+18	2024-01-16 11:04:28	3			1993-05-11	Female	165	51	18.7	Right	THIRD TEST 24h	Erector Spin	Lateral	Lying	Left	Relaxed	14.1	279	1.11	19	1.15	15	Fabio Valenti	000560	2024	1	3	2	Morning
7.32463e+18	2024-01-16 11:04:28	4			1993-05-11	Female	165	51	18.7	Right	THIRD TEST 24h	Erector Spin	Lateral	Lying	Left	Relaxed	14.2	280	1.11	18.8	1.14	15	Fabio Valenti	000560	2024	1	3	2	Morning
7.32463e+18	2024-01-16 11:04:29	5			1993-05-11	Female	165	51	18.7	Right	THIRD TEST 24h	Erector Spin	Lateral	Lying	Left	Relaxed	14.3	283	1.12	18.7	1.14	15	Fabio Valenti	000560	2024	1	3	2	Morning
7.32463e+18	2024-01-16 11:04:35	1			1993-05-11	Female	165	51	18.7	Right	THIRD TEST 24h	Erector Spin	Lateral	Lying	Right	Relaxed	16.1	335	1.64	16.7	1.05	15	Fabio Valenti	000560	2024	1	3	2	Morning
7.32463e+18	2024-01-16 11:04:36	2			1993-05-11	Female	165	51	18.7	Right	THIRD TEST 24h	Erector Spin	Lateral	Lying	Right	Relaxed	16.4	343	1.61	16.5	1.04	15	Fabio Valenti	000560	2024	1	3	2	Morning
7.32463e+18	2024-01-16 11:04:37	3			1993-05-11	Female	165	51	18.7	Right	THIRD TEST 24h	Erector Spin	Lateral	Lying	Right	Relaxed	16.2	345	1.57	16.4	1.03	15	Fabio Valenti	000560	2024	1	3	2	Morning
7.32463e+18	2024-01-16 11:04:38	4			1993-05-11	Female	165	51	18.7	Right	THIRD TEST 24h	Erector Spin	Lateral	Lying	Right	Relaxed	16.3	348	1.58	16.3	1.03	15	Fabio Valenti	000560	2024	1	3	2	Morning
7.32463e+18	2024-01-16 11:04:38	5			1993-05-11	Female	165	51	18.7	Right	THIRD TEST 24h	Erector Spin	Lateral	Lying	Right	Relaxed	16.3	350	1.6	16.2	1.02	15	Fabio Valenti	000560	2024	1	3	2	Morning
7.32464e+18	2024-01-16 11:04:56	1			1993-05-11	Female	165	51	18.7	Right	THIRD TEST 24h	Erector Spin	Lateral	Sitting	Left	Relaxed	19.6	489	0.94	10.6	0.67	15	Fabio Valenti	000560	2024	1	3	2	Morning
7.32464e+18	2024-01-16 11:04:57	2			1993-05-11	Female	165	51	18.7	Right	THIRD TEST 24h	Erector Spin	Lateral	Sitting	Left	Relaxed	19.3	492	0.88	10.6	0.68	15	Fabio Valenti	000560	2024	1	3	2	Morning
7.32464e+18	2024-01-16 11:04:58	3			1993-05-11	Female	165	51	18.7	Right	THIRD TEST 24h	Erector Spin	Lateral	Sitting	Left	Relaxed	19.4	495	0.91	10.6	0.68	15	Fabio Valenti	000560	2024	1	3	2	Morning
7.32464e+18	2024-01-16 11:04:59	4			1993-05-11	Female	165	51	18.7	Right	THIRD TEST 24h	Erector Spin	Lateral	Sitting	Left	Relaxed	19.3	495	0.89	10.6	0.68	15	Fabio Valenti	000560	2024	1	3	2	Morning
7.32464e+18	2024-01-16 11:04:59	5			1993-05-11	Female	165	51	18.7	Right	THIRD TEST 24h	Erector Spin	Lateral	Sitting	Left	Relaxed	19.3	495	0.88	10.6	0.68	15	Fabio Valenti	000560	2024	1	3	2	Morning
7.32464e+18	2024-01-16 11:05:06	1			1993-05-11	Female	165	51	18.7	Right	THIRD TEST 24h	Erector Spin	Lateral	Sitting	Right	Relaxed	23.5	689	0.84	7.5	0.5	15	Fabio Valenti	000560	2024	1	3	2	Morning
7.32464e+18	2024-01-16 11:05:07	2			1993-05-11	Female	165	51	18.7	Right	THIRD TEST 24h	Erector Spin	Lateral	Sitting	Right	Relaxed	23.4	690	0.83	7.5	0.5	15	Fabio Valenti	000560	2024	1	3	2	Morning
7.32464e+18	2024-01-16 11:05:08	3			1993-05-11	Female	165	51	18.7	Right	THIRD TEST 24h	Erector Spin	Lateral	Sitting	Right	Relaxed	23.1	700	0.83	7.5	0.5	15	Fabio Valenti	000560	2024	1	3	2	Morning
7.32464e+18	2024-01-16 11:05:08	4			1993-05-11	Female	165	51	18.7	Right	THIRD TEST 24h	Erector Spin	Lateral	Sitting	Right	Relaxed	23	705	0.82	7.3	0.49	15	Fabio Valenti	000560	2024	1	3	2	Morning
7.32464e+18	2024-01-16 11:05:10	5			1993-05-11	Female	165	51	18.7	Right	THIRD TEST 24h	Erector Spin	Lateral	Sitting	Right	Relaxed	23.3	711	0.82	7.4	0.5	15	Fabio Valenti	000560	2024	1	3	2	Morning
7.32279e+18	2024-01-11 11:55:13	1			1984-06-23	Female	172	63	21.3	Right	FIRST TEST	Erector Spin	Lateral	Lying	Left	Relaxed	12.8	236	1.47	24.7	1.5	15	Fabio Valenti	000560	2024	1	2	4	Morning
7.32279e+18	2024-01-11 11:55:13	2			1984-06-23	Female	172	63	21.3	Right	FIRST TEST	Erector Spin	Lateral	Lying	Left	Relaxed	12.8	243	1.45	24.7	1.51	15	Fabio Valenti	000560	2024	1	2	4	Morning
7.32279e+18	2024-01-11 11:55:14	3			1984-06-23	Female	172	63	21.3	Right	FIRST TEST	Erector Spin	Lateral	Lying	Left	Relaxed	12.9	243	1.43	24.7	1.51	15	Fabio Valenti	000560	2024	1	2	4	Morning
7.32279e+18	2024-01-11 11:55:15	4			1984-06-23	Female	172	63	21.3	Right	FIRST TEST	Erector Spin	Lateral	Lying	Left	Relaxed	12.9	243	1.42	24.6	1.5	15	Fabio Valenti	000560	2024	1	2	4	Morning
7.32279e+18	2024-01-11 11:55:16	5			1984-06-23	Female	172	63	21.3	Right	FIRST TEST	Erector Spin	Lateral	Lying	Left	Relaxed	12.9	244	1.41	24.6	1.51	15	Fabio Valenti	000560	2024	1	2	4	Morning
7.32279e+18	2024-01-11 11:55:27	1			1984-06-23	Female	172	63	21.3	Right	FIRST TEST	Erector Spin	Lateral	Lying	Right	Relaxed	12.7	207	1.24	28.4	1.73	15	Fabio Valenti	000560	2024	1	2	4	Morning
7.32279e+18	2024-01-11 11:55:28	2			1984-06-23	Female	172	63	21.3	Right	FIRST TEST	Erector Spin	Lateral	Lying	Right	Relaxed	12.7	211	1.24	28	1.7	15	Fabio Valenti	000560	2024	1	2	4	Morning
7.32279e+18	2024-01-11 11:55:29	3			1984-06-23	Female	172	63	21.3	Right	FIRST TEST	Erector Spin	Lateral	Lying	Right	Relaxed	12.7	211	1.22	28	1.71	15	Fabio Valenti	000560	2024	1	2	4	Morning
7.32279e+18	2024-01-11 11:55:30	4			1984-06-23	Female	172	63	21.3	Right	FIRST TEST	Erector Spin	Lateral	Lying	Right	Relaxed	12.8	218	1.22	27.9	1.7	15	Fabio Valenti	000560	2024	1	2	4	Morning
7.32279e+18	2024-01-11 11:55:30	5			1984-06-23	Female	172	63	21.3	Right	FIRST TEST	Erector Spin	Lateral	Lying	Right	Relaxed	12.7	217	1.22	27.9	1.71	15	Fabio Valenti	000560	2024	1	2	4	Morning
7.32279e+18	2024-01-11 11:56:03	1			1984-06-23	Female	172	63	21.3	Right	FIRST TEST	Erector Spin	Lateral	Sitting	Left	Relaxed	14.9	365	1.32	15.3	0.95	15	Fabio Valenti	000560	2024	1	2	4	Morning
7.32279e+18	2024-01-11 11:56:05	2			1984-06-23	Female	172	63	21.3	Right	FIRST TEST	Erector Spin	Lateral	Sitting	Left	Relaxed	15.1	382	1.35	14.7	0.92	15	Fabio Valenti	000560	2024	1	2	4	Morning
7.32279e+18	2024-01-11 11:56:06	3			1984-06-23	Female	172	63	21.3	Right	FIRST TEST	Erector Spin	Lateral	Sitting	Left	Relaxed	15.1	383	1.35	14.7	0.92	15	Fabio Valenti	000560	2024	1	2	4	Morning
7.32279e+18	2024-01-11 11:56:07	4			1984-06-23	Female	172	63	21.3	Right	FIRST TEST	Erector Spin	Lateral	Sitting	Left	Relaxed	15.1	384	1.34	14.7	0.92	15	Fabio Valenti	000560	2024	1	2	4	Morning
7.32279e+18	2024-01-11 11:56:07	5			1984-06-23	Female	172	63	21.3	Right	FIRST TEST	Erector Spin	Lateral	Sitting	Left	Relaxed	15	382	1.37	14.7	0.92	15	Fabio Valenti	000560	2024	1	2	4	Morning
7.32279e+18	2024-01-11 11:56:16	1			1984-06-23	Female	172	63	21.3	Right	FIRST TEST	Erector Spin	Lateral	Sitting	Right	Relaxed	15.9	382	1.38	14.3	0.9	15	Fabio Valenti	000560	2024	1	2	4	Morning
7.32279e+18	2024-01-11 11:56:17	2			1984-06-23	Female	172	63	21.3	Right	FIRST TEST	Erector Spin	Lateral	Sitting	Right	Relaxed	15.6	381	1.39	14.5	0.91	15	Fabio Valenti	000560	2024	1	2	4	Morning
7.32279e+18	2024-01-11 11:56:18	3			1984-06-23	Female	172	63	21.3	Right	FIRST TEST	Erector Spin	Lateral	Sitting	Right	Relaxed	15.4	379	1.4	14.7	0.93	15	Fabio Valenti	000560	2024	1	2	4	Morning
7.32279e+18	2024-01-11 11:56:19	4			1984-06-23	Female	172	63	21.3	Right	FIRST TEST	Erector Spin	Lateral	Sitting	Right	Relaxed	15.1	378	1.4	14.7	0.93	15	Fabio Valenti	000560	2024	1	2	4	Morning
7.32279e+18	2024-01-11 11:56:19	5			1984-06-23	Female	172	63	21.3	Right	FIRST TEST	Erector Spin	Lateral	Sitting	Right	Relaxed	15.1	375	1.42	15	0.94	15	Fabio Valenti	000560	2024	1	2	4	Morning
7.3228e+18	2024-01-11 12:27:57	1			1984-06-23	Female	172	63	21.3	Right	SECOND TESTING 30 min	Erector Spin	Lateral	Lying	Left	Relaxed	13.9	278	1.53	19.2	1.15	15	Fabio Valenti	000560	2024	1	2	4	Day
7.3228e+18	2024-01-11 12:27:58	2			1984-06-23	Female	172	63	21.3	Right	SECOND TESTING 30 min	Erector Spin	Lateral	Lying	Left	Relaxed	14	287	1.55	18.8	1.13	15	Fabio Valenti	000560	2024	1	2	4	Day
7.3228e+18	2024-01-11 12:27:59	3			1984-06-23	Female	172	63	21.3	Right	SECOND TESTING 30 min	Erector Spin	Lateral	Lying	Left	Relaxed	14	289	1.54	18.5	1.12	15	Fabio Valenti	000560	2024	1	2	4	Day
7.3228e+18	2024-01-11 12:27:59	4			1984-06-23	Female	172	63	21.3	Right	SECOND TESTING 30 min	Erector Spin	Lateral	Lying	Left	Relaxed	14.1	296	1.56	18.3	1.11	15	Fabio Valenti	000560	2024	1	2	4	Day
7.3228e+18	2024-01-11 12:28:00	5			1984-06-23	Female	172	63	21.3	Right	SECOND TESTING 30 min	Erector Spin	Lateral	Lying	Left	Relaxed	14.2	301	1.56	17.8	1.08	15	Fabio Valenti	000560	2024	1	2	4	Day
7.3228e+18	2024-01-11 12:28:07	1			1984-06-23	Female	172	63	21.3	Right	SECOND TESTING 30 min	Erector Spin	Lateral	Lying	Right	Relaxed	14.6	281	1.64	19.6	1.2	15	Fabio Valenti	000560	2024	1	2	4	Day
7.3228e+18	2024-01-11 12:28:07	2			1984-06-23	Female	172	63	21.3	Right	SECOND TESTING 30 min	Erector Spin	Lateral	Lying	Right	Relaxed	14.7	292	1.57	19	1.17	15	Fabio Valenti	000560	2024	1	2	4	Day
7.3228e+18	2024-01-11 12:28:08	3			1984-06-23	Female	172	63	21.3	Right	SECOND TESTING 30 min	Erector Spin	Lateral	Lying	Right	Relaxed	14.7	294	1.56	18.9	1.16	15	Fabio Valenti	000560	2024	1	2	4	Day
7.3228e+18	2024-01-11 12:28:09	4			1984-06-23	Female	172	63	21.3	Right	SECOND TESTING 30 min	Erector Spin	Lateral	Lying	Right	Relaxed	14.7	297	1.56	18.6	1.14	15	Fabio Valenti	000560	2024	1	2	4	Day
7.3228e+18	2024-01-11 12:28:09	5			1984-06-23	Female	172	63	21.3	Right	SECOND TESTING 30 min	Erector Spin	Lateral	Lying	Right	Relaxed	14.9	302	1.54	18.3	1.12	15	Fabio Valenti	000560	2024	1	2	4	Day
7.3228e+18	2024-01-11 12:28:34	1			1984-06-23	Female	172	63	21.3	Right	SECOND TESTING 30 min	Erector Spin	Lateral	Sitting	Left	Relaxed	15.8	375	1.38	14.8	0.92	15	Fabio Valenti	000560	2024	1	2	4	Day
7.3228e+18	2024-01-11 12:28:34	2			1984-06-23	Female	172	63	21.3	Right	SECOND TESTING 30 min	Erector Spin	Lateral	Sitting	Left	Relaxed	15.7	385	1.35	14.6	0.91	15	Fabio Valenti	000560	2024	1	2	4	Day
7.3228e+18	2024-01-11 12:28:35	3			1984-06-23	Female	172	63	21.3	Right	SECOND TESTING 30 min	Erector Spin	Lateral	Sitting	Left	Relaxed	15.7	386	1.34	14.6	0.91	15	Fabio Valenti	000560	2024	1	2	4	Day
7.3228e+18	2024-01-11 12:28:36	4			1984-06-23	Female	172	63	21.3	Right	SECOND TESTING 30 min	Erector Spin	Lateral	Sitting	Left	Relaxed	15.6	388	1.35	14.7	0.92	15	Fabio Valenti	000560	2024	1	2	4	Day
7.3228e+18	2024-01-11 12:28:37	5			1984-06-23	Female	172	63	21.3	Right	SECOND TESTING 30 min	Erector Spin	Lateral	Sitting	Left	Relaxed	15.6	387	1.33	14.8	0.92	15	Fabio Valenti	000560	2024	1	2	4	Day
7.3228e+18	2024-01-11 12:28:44	1			1984-06-23	Female	172	63	21.3	Right	SECOND TESTING 30 min	Erector Spin	Lateral	Sitting	Right	Relaxed	16.6	413	1.39	13.5	0.85	15	Fabio Valenti	000560	2024	1	2	4	Day
7.3228e+18	2024-01-11 12:28:45	2			1984-06-23	Female	172	63	21.3	Right	SECOND TESTING 30 min	Erector Spin	Lateral	Sitting	Right	Relaxed	16.3	415	1.36	13.5	0.85	15	Fabio Valenti	000560	2024	1	2	4	Day
7.3228e+18	2024-01-11 12:28:46	3			1984-06-23	Female	172	63	21.3	Right	SECOND TESTING 30 min	Erector Spin	Lateral	Sitting	Right	Relaxed	16.3	413	1.36	13.6	0.86	15	Fabio Valenti	000560	2024	1	2	4	Day
7.3228e+18	2024-01-11 12:28:46	4			1984-06-23	Female	172	63	21.3	Right	SECOND TESTING 30 min	Erector Spin	Lateral	Sitting	Right	Relaxed	16.1	413	1.37	13.7	0.86	15	Fabio Valenti	000560	2024	1	2	4	Day
7.3228e+18	2024-01-11 12:28:47	5			1984-06-23	Female	172	63	21.3	Right	SECOND TESTING 30 min	Erector Spin	Lateral	Sitting	Right	Relaxed	16.2	412	1.36	13.6	0.85	15	Fabio Valenti	000560	2024	1	2	4	Day
7.32316e+18	2024-01-12 11:59:58	1			1984-06-23	Female	172	63	21.3	Right	THIRD TEST 24h	Erector Spin	Lateral	Lying	Left	Relaxed	12.8	259	1.48	21.3	1.31	15	Fabio Valenti	000560	2024	1	2	5	Morning
7.32316e+18	2024-01-12 11:59:59	2			1984-06-23	Female	172	63	21.3	Right	THIRD TEST 24h	Erector Spin	Lateral	Lying	Left	Relaxed	12.7	263	1.41	20.8	1.28	15	Fabio Valenti	000560	2024	1	2	5	Morning
7.32316e+18	2024-01-12 12:00:01	3			1984-06-23	Female	172	63	21.3	Right	THIRD TEST 24h	Erector Spin	Lateral	Lying	Left	Relaxed	12.8	273	1.44	20.1	1.24	15	Fabio Valenti	000560	2024	1	2	5	Day
7.32316e+18	2024-01-12 12:00:02	4			1984-06-23	Female	172	63	21.3	Right	THIRD TEST 24h	Erector Spin	Lateral	Lying	Left	Relaxed	12.8	273	1.43	20.2	1.25	15	Fabio Valenti	000560	2024	1	2	5	Day
7.32316e+18	2024-01-12 12:00:03	5			1984-06-23	Female	172	63	21.3	Right	THIRD TEST 24h	Erector Spin	Lateral	Lying	Left	Relaxed	12.8	270	1.42	20.5	1.27	15	Fabio Valenti	000560	2024	1	2	5	Day
7.32316e+18	2024-01-12 12:00:12	1			1984-06-23	Female	172	63	21.3	Right	THIRD TEST 24h	Erector Spin	Lateral	Lying	Right	Relaxed	13.7	251	1.38	22	1.35	15	Fabio Valenti	000560	2024	1	2	5	Day
7.32316e+18	2024-01-12 12:00:13	2			1984-06-23	Female	172	63	21.3	Right	THIRD TEST 24h	Erector Spin	Lateral	Lying	Right	Relaxed	13.7	253	1.36	22	1.35	15	Fabio Valenti	000560	2024	1	2	5	Day
7.32316e+18	2024-01-12 12:00:14	3			1984-06-23	Female	172	63	21.3	Right	THIRD TEST 24h	Erector Spin	Lateral	Lying	Right	Relaxed	13.7	251	1.33	22.2	1.37	15	Fabio Valenti	000560	2024	1	2	5	Day
7.32316e+18	2024-01-12 12:00:15	4			1984-06-23	Female	172	63	21.3	Right	THIRD TEST 24h	Erector Spin	Lateral	Lying	Right	Relaxed	13.7	252	1.32	22	1.35	15	Fabio Valenti	000560	2024	1	2	5	Day
7.32316e+18	2024-01-12 12:00:15	5			1984-06-23	Female	172	63	21.3	Right	THIRD TEST 24h	Erector Spin	Lateral	Lying	Right	Relaxed	13.7	251	1.31	22.2	1.37	15	Fabio Valenti	000560	2024	1	2	5	Day
7.32317e+18	2024-01-12 12:00:46	1			1984-06-23	Female	172	63	21.3	Right	THIRD TEST 24h	Erector Spin	Lateral	Sitting	Left	Relaxed	15.1	368	1.48	15.5	0.97	15	Fabio Valenti	000560	2024	1	2	5	Day
7.32317e+18	2024-01-12 12:00:47	2			1984-06-23	Female	172	63	21.3	Right	THIRD TEST 24h	Erector Spin	Lateral	Sitting	Left	Relaxed	15	371	1.5	15.3	0.96	15	Fabio Valenti	000560	2024	1	2	5	Day
7.32317e+18	2024-01-12 12:00:47	3			1984-06-23	Female	172	63	21.3	Right	THIRD TEST 24h	Erector Spin	Lateral	Sitting	Left	Relaxed	14.7	374	1.48	15.3	0.96	15	Fabio Valenti	000560	2024	1	2	5	Day
7.32317e+18	2024-01-12 12:00:48	4			1984-06-23	Female	172	63	21.3	Right	THIRD TEST 24h	Erector Spin	Lateral	Sitting	Left	Relaxed	14.5	368	1.52	15.5	0.97	15	Fabio Valenti	000560	2024	1	2	5	Day
7.32317e+18	2024-01-12 12:00:49	5			1984-06-23	Female	172	63	21.3	Right	THIRD TEST 24h	Erector Spin	Lateral	Sitting	Left	Relaxed	14.4	364	1.53	15.7	0.98	15	Fabio Valenti	000560	2024	1	2	5	Day
7.32317e+18	2024-01-12 12:00:58	1			1984-06-23	Female	172	63	21.3	Right	THIRD TEST 24h	Erector Spin	Lateral	Sitting	Right	Relaxed	14.8	354	1.38	16.3	1.03	15	Fabio Valenti	000560	2024	1	2	5	Day
7.32317e+18	2024-01-12 12:00:59	2			1984-06-23	Female	172	63	21.3	Right	THIRD TEST 24h	Erector Spin	Lateral	Sitting	Right	Relaxed	14.7	356	1.37	16.3	1.03	15	Fabio Valenti	000560	2024	1	2	5	Day
7.32317e+18	2024-01-12 12:01:00	3			1984-06-23	Female	172	63	21.3	Right	THIRD TEST 24h	Erector Spin	Lateral	Sitting	Right	Relaxed	14.5	356	1.37	16.5	1.04	15	Fabio Valenti	000560	2024	1	2	5	Day
7.32317e+18	2024-01-12 12:01:00	4			1984-06-23	Female	172	63	21.3	Right	THIRD TEST 24h	Erector Spin	Lateral	Sitting	Right	Relaxed	14.6	355	1.35	16.5	1.04	15	Fabio Valenti	000560	2024	1	2	5	Day
7.32317e+18	2024-01-12 12:01:01	5			1984-06-23	Female	172	63	21.3	Right	THIRD TEST 24h	Erector Spin	Lateral	Sitting	Right	Relaxed	14.5	351	1.37	16.6	1.05	15	Fabio Valenti	000560	2024	1	2	5	Day
7.32427e+18	2024-01-15 11:14:40	1			1964-01-25	Female	170	70	24.2	Right	FIRST TEST	Erector Spin	Lateral	Lying	Left	Relaxed	16.7	343	1.48	17.1	1.09	15	Fabio Valenti	000560	2024	1	3	1	Morning
7.32427e+18	2024-01-15 11:14:41	2			1964-01-25	Female	170	70	24.2	Right	FIRST TEST	Erector Spin	Lateral	Lying	Left	Relaxed	16.7	349	1.45	17	1.09	15	Fabio Valenti	000560	2024	1	3	1	Morning
7.32427e+18	2024-01-15 11:14:42	3			1964-01-25	Female	170	70	24.2	Right	FIRST TEST	Erector Spin	Lateral	Lying	Left	Relaxed	16.8	353	1.46	16.8	1.08	15	Fabio Valenti	000560	2024	1	3	1	Morning
7.32427e+18	2024-01-15 11:14:43	4			1964-01-25	Female	170	70	24.2	Right	FIRST TEST	Erector Spin	Lateral	Lying	Left	Relaxed	16.9	354	1.46	16.5	1.06	15	Fabio Valenti	000560	2024	1	3	1	Morning
7.32427e+18	2024-01-15 11:14:43	5			1964-01-25	Female	170	70	24.2	Right	FIRST TEST	Erector Spin	Lateral	Lying	Left	Relaxed	17.1	359	1.45	16.4	1.05	15	Fabio Valenti	000560	2024	1	3	1	Morning
7.32427e+18	2024-01-15 11:15:08	1			1964-01-25	Female	170	70	24.2	Right	FIRST TEST	Erector Spin	Lateral	Lying	Right	Relaxed	17.3	372	1.59	15.7	1	15	Fabio Valenti	000560	2024	1	3	1	Morning
7.32427e+18	2024-01-15 11:15:09	2			1964-01-25	Female	170	70	24.2	Right	FIRST TEST	Erector Spin	Lateral	Lying	Right	Relaxed	17.1	373	1.61	15.7	1	15	Fabio Valenti	000560	2024	1	3	1	Morning
7.32427e+18	2024-01-15 11:15:09	3			1964-01-25	Female	170	70	24.2	Right	FIRST TEST	Erector Spin	Lateral	Lying	Right	Relaxed	17.9	393	1.53	15.4	1	15	Fabio Valenti	000560	2024	1	3	1	Morning
7.32427e+18	2024-01-15 11:15:10	4			1964-01-25	Female	170	70	24.2	Right	FIRST TEST	Erector Spin	Lateral	Lying	Right	Relaxed	17.6	387	1.54	15.3	0.99	15	Fabio Valenti	000560	2024	1	3	1	Morning
7.32427e+18	2024-01-15 11:15:11	5			1964-01-25	Female	170	70	24.2	Right	FIRST TEST	Erector Spin	Lateral	Lying	Right	Relaxed	17.8	391	1.51	15.1	0.98	15	Fabio Valenti	000560	2024	1	3	1	Morning
7.32427e+18	2024-01-15 11:15:48	1			1964-01-25	Female	170	70	24.2	Right	FIRST TEST	Erector Spin	Lateral	Sitting	Left	Relaxed	28.8	749	1.06	6.7	0.45	15	Fabio Valenti	000560	2024	1	3	1	Morning
7.32427e+18	2024-01-15 11:15:49	2			1964-01-25	Female	170	70	24.2	Right	FIRST TEST	Erector Spin	Lateral	Sitting	Left	Relaxed	28.8	758	1.02	6.7	0.45	15	Fabio Valenti	000560	2024	1	3	1	Morning
7.32427e+18	2024-01-15 11:15:50	3			1964-01-25	Female	170	70	24.2	Right	FIRST TEST	Erector Spin	Lateral	Sitting	Left	Relaxed	28.8	763	1	6.5	0.44	15	Fabio Valenti	000560	2024	1	3	1	Morning
7.32427e+18	2024-01-15 11:15:50	4			1964-01-25	Female	170	70	24.2	Right	FIRST TEST	Erector Spin	Lateral	Sitting	Left	Relaxed	29.1	772	0.99	6.5	0.44	15	Fabio Valenti	000560	2024	1	3	1	Morning
7.32427e+18	2024-01-15 11:15:51	5			1964-01-25	Female	170	70	24.2	Right	FIRST TEST	Erector Spin	Lateral	Sitting	Left	Relaxed	29.3	772	0.99	6.5	0.44	15	Fabio Valenti	000560	2024	1	3	1	Morning
7.32427e+18	2024-01-15 11:15:59	1			1964-01-25	Female	170	70	24.2	Right	FIRST TEST	Erector Spin	Lateral	Sitting	Right	Relaxed	27.1	723	0.83	7.3	0.49	15	Fabio Valenti	000560	2024	1	3	1	Morning
7.32427e+18	2024-01-15 11:16:00	2			1964-01-25	Female	170	70	24.2	Right	FIRST TEST	Erector Spin	Lateral	Sitting	Right	Relaxed	26.8	724	0.83	7.3	0.49	15	Fabio Valenti	000560	2024	1	3	1	Morning
7.32427e+18	2024-01-15 11:16:00	3			1964-01-25	Female	170	70	24.2	Right	FIRST TEST	Erector Spin	Lateral	Sitting	Right	Relaxed	26.8	727	0.83	7.3	0.49	15	Fabio Valenti	000560	2024	1	3	1	Morning
7.32427e+18	2024-01-15 11:16:01	4			1964-01-25	Female	170	70	24.2	Right	FIRST TEST	Erector Spin	Lateral	Sitting	Right	Relaxed	26.6	721	0.84	7.5	0.5	15	Fabio Valenti	000560	2024	1	3	1	Morning
7.32427e+18	2024-01-15 11:16:02	5			1964-01-25	Female	170	70	24.2	Right	FIRST TEST	Erector Spin	Lateral	Sitting	Right	Relaxed	26.8	727	0.83	7.3	0.49	15	Fabio Valenti	000560	2024	1	3	1	Morning
7.32427e+18	2024-01-15 11:45:51	1			1964-01-25	Female	170	70	24.2	Right	SECOND TESTING 30 min	Erector Spin	Lateral	Lying	Left	Relaxed	15.3	307	1.56	19.1	1.2	15	Fabio Valenti	000560	2024	1	3	1	Morning
7.32427e+18	2024-01-15 11:45:52	2			1964-01-25	Female	170	70	24.2	Right	SECOND TESTING 30 min	Erector Spin	Lateral	Lying	Left	Relaxed	15.4	314	1.56	18.7	1.18	15	Fabio Valenti	000560	2024	1	3	1	Morning
7.32427e+18	2024-01-15 11:45:53	3			1964-01-25	Female	170	70	24.2	Right	SECOND TESTING 30 min	Erector Spin	Lateral	Lying	Left	Relaxed	15.3	316	1.56	18.6	1.17	15	Fabio Valenti	000560	2024	1	3	1	Morning
7.32427e+18	2024-01-15 11:45:54	4			1964-01-25	Female	170	70	24.2	Right	SECOND TESTING 30 min	Erector Spin	Lateral	Lying	Left	Relaxed	15.5	318	1.54	18.4	1.16	15	Fabio Valenti	000560	2024	1	3	1	Morning
7.32427e+18	2024-01-15 11:45:54	5			1964-01-25	Female	170	70	24.2	Right	SECOND TESTING 30 min	Erector Spin	Lateral	Lying	Left	Relaxed	15.5	321	1.54	18.3	1.15	15	Fabio Valenti	000560	2024	1	3	1	Morning
7.32427e+18	2024-01-15 11:46:01	1			1964-01-25	Female	170	70	24.2	Right	SECOND TESTING 30 min	Erector Spin	Lateral	Lying	Right	Relaxed	20.1	419	1.76	13.4	0.86	15	Fabio Valenti	000560	2024	1	3	1	Morning
7.32427e+18	2024-01-15 11:46:02	2			1964-01-25	Female	170	70	24.2	Right	SECOND TESTING 30 min	Erector Spin	Lateral	Lying	Right	Relaxed	20.6	429	1.7	13	0.84	15	Fabio Valenti	000560	2024	1	3	1	Morning
7.32427e+18	2024-01-15 11:46:03	3			1964-01-25	Female	170	70	24.2	Right	SECOND TESTING 30 min	Erector Spin	Lateral	Lying	Right	Relaxed	20.4	445	1.71	12.9	0.84	15	Fabio Valenti	000560	2024	1	3	1	Morning
7.32427e+18	2024-01-15 11:46:04	4			1964-01-25	Female	170	70	24.2	Right	SECOND TESTING 30 min	Erector Spin	Lateral	Lying	Right	Relaxed	20.4	446	1.67	12.9	0.84	15	Fabio Valenti	000560	2024	1	3	1	Morning
7.32427e+18	2024-01-15 11:46:04	5			1964-01-25	Female	170	70	24.2	Right	SECOND TESTING 30 min	Erector Spin	Lateral	Lying	Right	Relaxed	20.6	450	1.64	12.7	0.83	15	Fabio Valenti	000560	2024	1	3	1	Morning
7.32427e+18	2024-01-15 11:46:35	1			1964-01-25	Female	170	70	24.2	Right	SECOND TESTING 30 min	Erector Spin	Lateral	Sitting	Left	Relaxed	26.4	682	1	7.5	0.51	15	Fabio Valenti	000560	2024	1	3	1	Morning
7.32427e+18	2024-01-15 11:46:36	2			1964-01-25	Female	170	70	24.2	Right	SECOND TESTING 30 min	Erector Spin	Lateral	Sitting	Left	Relaxed	26.6	688	0.97	7.5	0.51	15	Fabio Valenti	000560	2024	1	3	1	Morning
7.32427e+18	2024-01-15 11:46:37	3			1964-01-25	Female	170	70	24.2	Right	SECOND TESTING 30 min	Erector Spin	Lateral	Sitting	Left	Relaxed	26.5	690	0.95	7.4	0.5	15	Fabio Valenti	000560	2024	1	3	1	Morning
7.32427e+18	2024-01-15 11:46:38	4			1964-01-25	Female	170	70	24.2	Right	SECOND TESTING 30 min	Erector Spin	Lateral	Sitting	Left	Relaxed	26.7	694	0.94	7.4	0.5	15	Fabio Valenti	000560	2024	1	3	1	Morning
7.32427e+18	2024-01-15 11:46:38	5			1964-01-25	Female	170	70	24.2	Right	SECOND TESTING 30 min	Erector Spin	Lateral	Sitting	Left	Relaxed	26.8	694	0.94	7.3	0.5	15	Fabio Valenti	000560	2024	1	3	1	Morning
7.32427e+18	2024-01-15 11:46:44	1			1964-01-25	Female	170	70	24.2	Right	SECOND TESTING 30 min	Erector Spin	Lateral	Sitting	Right	Relaxed	23.7	600	1.06	9.1	0.61	15	Fabio Valenti	000560	2024	1	3	1	Morning
7.32427e+18	2024-01-15 11:46:45	2			1964-01-25	Female	170	70	24.2	Right	SECOND TESTING 30 min	Erector Spin	Lateral	Sitting	Right	Relaxed	24	617	1.02	8.9	0.6	15	Fabio Valenti	000560	2024	1	3	1	Morning
7.32427e+18	2024-01-15 11:46:45	3			1964-01-25	Female	170	70	24.2	Right	SECOND TESTING 30 min	Erector Spin	Lateral	Sitting	Right	Relaxed	23.9	617	1.01	8.9	0.6	15	Fabio Valenti	000560	2024	1	3	1	Morning
7.32427e+18	2024-01-15 11:46:46	4			1964-01-25	Female	170	70	24.2	Right	SECOND TESTING 30 min	Erector Spin	Lateral	Sitting	Right	Relaxed	23.7	612	0.99	8.9	0.6	15	Fabio Valenti	000560	2024	1	3	1	Morning
7.32427e+18	2024-01-15 11:46:47	5			1964-01-25	Female	170	70	24.2	Right	SECOND TESTING 30 min	Erector Spin	Lateral	Sitting	Right	Relaxed	23.6	615	1	8.9	0.6	15	Fabio Valenti	000560	2024	1	3	1	Morning
7.32464e+18	2024-01-16 11:08:16	1			1964-01-25	Female	170	70	24.2	Right	THIRD TEST 24h	Erector Spin	Lateral	Lying	Left	Relaxed	17.1	397	1.23	13.4	0.83	15	Fabio Valenti	000560	2024	1	3	2	Morning
7.32464e+18	2024-01-16 11:08:17	2			1964-01-25	Female	170	70	24.2	Right	THIRD TEST 24h	Erector Spin	Lateral	Lying	Left	Relaxed	17.1	398	1.21	13.7	0.85	15	Fabio Valenti	000560	2024	1	3	2	Morning
7.32464e+18	2024-01-16 11:08:17	3			1964-01-25	Female	170	70	24.2	Right	THIRD TEST 24h	Erector Spin	Lateral	Lying	Left	Relaxed	17.3	393	1.2	13.8	0.86	15	Fabio Valenti	000560	2024	1	3	2	Morning
7.32464e+18	2024-01-16 11:08:18	4			1964-01-25	Female	170	70	24.2	Right	THIRD TEST 24h	Erector Spin	Lateral	Lying	Left	Relaxed	17.3	388	1.18	13.7	0.85	15	Fabio Valenti	000560	2024	1	3	2	Morning
7.32464e+18	2024-01-16 11:08:19	5			1964-01-25	Female	170	70	24.2	Right	THIRD TEST 24h	Erector Spin	Lateral	Lying	Left	Relaxed	17.3	385	1.18	13.8	0.85	15	Fabio Valenti	000560	2024	1	3	2	Morning
7.32464e+18	2024-01-16 11:08:48	1			1964-01-25	Female	170	70	24.2	Right	THIRD TEST 24h	Erector Spin	Lateral	Lying	Right	Relaxed	18	388	1.29	14.4	0.91	15	Fabio Valenti	000560	2024	1	3	2	Morning
7.32464e+18	2024-01-16 11:08:49	2			1964-01-25	Female	170	70	24.2	Right	THIRD TEST 24h	Erector Spin	Lateral	Lying	Right	Relaxed	18	395	1.26	14.2	0.9	15	Fabio Valenti	000560	2024	1	3	2	Morning
7.32464e+18	2024-01-16 11:08:50	3			1964-01-25	Female	170	70	24.2	Right	THIRD TEST 24h	Erector Spin	Lateral	Lying	Right	Relaxed	18.1	406	1.24	14.1	0.9	15	Fabio Valenti	000560	2024	1	3	2	Morning
7.32464e+18	2024-01-16 11:08:51	4			1964-01-25	Female	170	70	24.2	Right	THIRD TEST 24h	Erector Spin	Lateral	Lying	Right	Relaxed	18.2	409	1.23	13.9	0.89	15	Fabio Valenti	000560	2024	1	3	2	Morning
7.32464e+18	2024-01-16 11:08:51	5			1964-01-25	Female	170	70	24.2	Right	THIRD TEST 24h	Erector Spin	Lateral	Lying	Right	Relaxed	18.3	413	1.22	13.9	0.89	15	Fabio Valenti	000560	2024	1	3	2	Morning
7.32464e+18	2024-01-16 11:09:31	1			1964-01-25	Female	170	70	24.2	Right	THIRD TEST 24h	Erector Spin	Lateral	Sitting	Left	Relaxed	24.7	637	0.94	8.2	0.54	15	Fabio Valenti	000560	2024	1	3	2	Morning
7.32464e+18	2024-01-16 11:09:31	2			1964-01-25	Female	170	70	24.2	Right	THIRD TEST 24h	Erector Spin	Lateral	Sitting	Left	Relaxed	24.5	635	0.91	8.3	0.55	15	Fabio Valenti	000560	2024	1	3	2	Morning
7.32464e+18	2024-01-16 11:09:32	3			1964-01-25	Female	170	70	24.2	Right	THIRD TEST 24h	Erector Spin	Lateral	Sitting	Left	Relaxed	24.4	634	0.9	8.3	0.55	15	Fabio Valenti	000560	2024	1	3	2	Morning
7.32464e+18	2024-01-16 11:09:33	4			1964-01-25	Female	170	70	24.2	Right	THIRD TEST 24h	Erector Spin	Lateral	Sitting	Left	Relaxed	24.4	630	0.91	8.3	0.55	15	Fabio Valenti	000560	2024	1	3	2	Morning
7.32464e+18	2024-01-16 11:09:34	5			1964-01-25	Female	170	70	24.2	Right	THIRD TEST 24h	Erector Spin	Lateral	Sitting	Left	Relaxed	24.4	632	0.91	8.3	0.55	15	Fabio Valenti	000560	2024	1	3	2	Morning
7.32464e+18	2024-01-16 11:09:40	1			1964-01-25	Female	170	70	24.2	Right	THIRD TEST 24h	Erector Spin	Lateral	Sitting	Right	Relaxed	23.5	601	1.05	8.8	0.58	15	Fabio Valenti	000560	2024	1	3	2	Morning
7.32464e+18	2024-01-16 11:09:41	2			1964-01-25	Female	170	70	24.2	Right	THIRD TEST 24h	Erector Spin	Lateral	Sitting	Right	Relaxed	23.4	607	1.02	8.8	0.58	15	Fabio Valenti	000560	2024	1	3	2	Morning
7.32464e+18	2024-01-16 11:09:42	3			1964-01-25	Female	170	70	24.2	Right	THIRD TEST 24h	Erector Spin	Lateral	Sitting	Right	Relaxed	23.6	612	1.01	8.7	0.57	15	Fabio Valenti	000560	2024	1	3	2	Morning
7.32464e+18	2024-01-16 11:09:43	4			1964-01-25	Female	170	70	24.2	Right	THIRD TEST 24h	Erector Spin	Lateral	Sitting	Right	Relaxed	23.3	611	1.05	8.6	0.57	15	Fabio Valenti	000560	2024	1	3	2	Morning
7.32464e+18	2024-01-16 11:09:43	5			1964-01-25	Female	170	70	24.2	Right	THIRD TEST 24h	Erector Spin	Lateral	Sitting	Right	Relaxed	23.6	617	1	8.6	0.57	15	Fabio Valenti	000560	2024	1	3	2	Morning
7.32398e+18	2024-01-14 16:28:41	1			1962-12-06	Female	165	55	20.2	Right	FIRST TEST	Erector Spin	Lateral	Lying	Left	Relaxed	14	276	1.42	19.7	1.21	15	Fabio Valenti	000560	2024	1	2	7	Day
7.32398e+18	2024-01-14 16:28:42	2			1962-12-06	Female	165	55	20.2	Right	FIRST TEST	Erector Spin	Lateral	Lying	Left	Relaxed	14	275	1.4	20.1	1.24	15	Fabio Valenti	000560	2024	1	2	7	Day
7.32398e+18	2024-01-14 16:28:43	3			1962-12-06	Female	165	55	20.2	Right	FIRST TEST	Erector Spin	Lateral	Lying	Left	Relaxed	13.8	273	1.38	20.4	1.26	15	Fabio Valenti	000560	2024	1	2	7	Day
7.32398e+18	2024-01-14 16:28:44	4			1962-12-06	Female	165	55	20.2	Right	FIRST TEST	Erector Spin	Lateral	Lying	Left	Relaxed	13.9	272	1.38	20.4	1.25	15	Fabio Valenti	000560	2024	1	2	7	Day
7.32398e+18	2024-01-14 16:28:44	5			1962-12-06	Female	165	55	20.2	Right	FIRST TEST	Erector Spin	Lateral	Lying	Left	Relaxed	13.9	271	1.41	20.3	1.25	15	Fabio Valenti	000560	2024	1	2	7	Day
7.32398e+18	2024-01-14 16:28:58	1			1962-12-06	Female	165	55	20.2	Right	FIRST TEST	Erector Spin	Lateral	Lying	Right	Relaxed	19.6	427	1.86	13	0.84	15	Fabio Valenti	000560	2024	1	2	7	Day
7.32398e+18	2024-01-14 16:28:59	2			1962-12-06	Female	165	55	20.2	Right	FIRST TEST	Erector Spin	Lateral	Lying	Right	Relaxed	19.9	439	1.85	12.6	0.81	15	Fabio Valenti	000560	2024	1	2	7	Day
7.32398e+18	2024-01-14 16:29:00	3			1962-12-06	Female	165	55	20.2	Right	FIRST TEST	Erector Spin	Lateral	Lying	Right	Relaxed	20.1	444	1.87	12.4	0.8	15	Fabio Valenti	000560	2024	1	2	7	Day
7.32398e+18	2024-01-14 16:29:00	4			1962-12-06	Female	165	55	20.2	Right	FIRST TEST	Erector Spin	Lateral	Lying	Right	Relaxed	20.2	451	1.83	12.3	0.8	15	Fabio Valenti	000560	2024	1	2	7	Day
7.32398e+18	2024-01-14 16:29:01	5			1962-12-06	Female	165	55	20.2	Right	FIRST TEST	Erector Spin	Lateral	Lying	Right	Relaxed	20.4	459	1.82	12.1	0.79	15	Fabio Valenti	000560	2024	1	2	7	Day
7.32398e+18	2024-01-14 16:29:33	1			1962-12-06	Female	165	55	20.2	Right	FIRST TEST	Erector Spin	Lateral	Sitting	Left	Relaxed	16.4	419	1.67	12.2	0.77	15	Fabio Valenti	000560	2024	1	2	7	Day
7.32398e+18	2024-01-14 16:29:34	2			1962-12-06	Female	165	55	20.2	Right	FIRST TEST	Erector Spin	Lateral	Sitting	Left	Relaxed	16.3	430	1.63	12.1	0.77	15	Fabio Valenti	000560	2024	1	2	7	Day
7.32398e+18	2024-01-14 16:29:35	3			1962-12-06	Female	165	55	20.2	Right	FIRST TEST	Erector Spin	Lateral	Sitting	Left	Relaxed	16.1	432	1.62	12.1	0.77	15	Fabio Valenti	000560	2024	1	2	7	Day
7.32398e+18	2024-01-14 16:29:35	4			1962-12-06	Female	165	55	20.2	Right	FIRST TEST	Erector Spin	Lateral	Sitting	Left	Relaxed	16	435	1.62	12.2	0.78	15	Fabio Valenti	000560	2024	1	2	7	Day
7.32398e+18	2024-01-14 16:29:36	5			1962-12-06	Female	165	55	20.2	Right	FIRST TEST	Erector Spin	Lateral	Sitting	Left	Relaxed	16	439	1.62	12.1	0.77	15	Fabio Valenti	000560	2024	1	2	7	Day
7.32398e+18	2024-01-14 16:29:57	1			1962-12-06	Female	165	55	20.2	Right	FIRST TEST	Erector Spin	Lateral	Sitting	Right	Relaxed	22.8	626	1.23	8.2	0.55	15	Fabio Valenti	000560	2024	1	2	7	Day
7.32398e+18	2024-01-14 16:29:57	2			1962-12-06	Female	165	55	20.2	Right	FIRST TEST	Erector Spin	Lateral	Sitting	Right	Relaxed	23	641	1.2	8.1	0.54	15	Fabio Valenti	000560	2024	1	2	7	Day
7.32398e+18	2024-01-14 16:29:58	3			1962-12-06	Female	165	55	20.2	Right	FIRST TEST	Erector Spin	Lateral	Sitting	Right	Relaxed	22.8	640	1.19	8.1	0.54	15	Fabio Valenti	000560	2024	1	2	7	Day
7.32398e+18	2024-01-14 16:29:59	4			1962-12-06	Female	165	55	20.2	Right	FIRST TEST	Erector Spin	Lateral	Sitting	Right	Relaxed	22.9	646	1.18	8	0.54	15	Fabio Valenti	000560	2024	1	2	7	Day
7.32398e+18	2024-01-14 16:30:00	5			1962-12-06	Female	165	55	20.2	Right	FIRST TEST	Erector Spin	Lateral	Sitting	Right	Relaxed	22.9	650	1.18	8	0.54	15	Fabio Valenti	000560	2024	1	2	7	Day
7.32398e+18	2024-01-14 16:55:48	1			1962-12-06	Female	165	55	20.2	Right	SECOND TESTING 30 min	Erector Spin	Lateral	Lying	Left	Relaxed	15.3	347	1.53	15.8	0.98	15	Fabio Valenti	000560	2024	1	2	7	Day
7.32398e+18	2024-01-14 16:55:49	2			1962-12-06	Female	165	55	20.2	Right	SECOND TESTING 30 min	Erector Spin	Lateral	Lying	Left	Relaxed	15.3	350	1.54	15.8	0.99	15	Fabio Valenti	000560	2024	1	2	7	Day
7.32398e+18	2024-01-14 16:55:50	3			1962-12-06	Female	165	55	20.2	Right	SECOND TESTING 30 min	Erector Spin	Lateral	Lying	Left	Relaxed	15.3	354	1.51	15.6	0.98	15	Fabio Valenti	000560	2024	1	2	7	Day
7.32398e+18	2024-01-14 16:55:50	4			1962-12-06	Female	165	55	20.2	Right	SECOND TESTING 30 min	Erector Spin	Lateral	Lying	Left	Relaxed	15.4	353	1.49	15.7	0.98	15	Fabio Valenti	000560	2024	1	2	7	Day
7.32398e+18	2024-01-14 16:55:51	5			1962-12-06	Female	165	55	20.2	Right	SECOND TESTING 30 min	Erector Spin	Lateral	Lying	Left	Relaxed	15.5	352	1.5	15.8	0.99	15	Fabio Valenti	000560	2024	1	2	7	Day
7.32398e+18	2024-01-14 16:56:03	1			1962-12-06	Female	165	55	20.2	Right	SECOND TESTING 30 min	Erector Spin	Lateral	Lying	Right	Relaxed	22.5	453	1.94	11.8	0.75	15	Fabio Valenti	000560	2024	1	2	7	Day
7.32398e+18	2024-01-14 16:56:04	2			1962-12-06	Female	165	55	20.2	Right	SECOND TESTING 30 min	Erector Spin	Lateral	Lying	Right	Relaxed	22.7	463	1.9	11.8	0.75	15	Fabio Valenti	000560	2024	1	2	7	Day
7.32398e+18	2024-01-14 16:56:04	3			1962-12-06	Female	165	55	20.2	Right	SECOND TESTING 30 min	Erector Spin	Lateral	Lying	Right	Relaxed	22.7	467	1.87	11.6	0.74	15	Fabio Valenti	000560	2024	1	2	7	Day
7.32398e+18	2024-01-14 16:56:05	4			1962-12-06	Female	165	55	20.2	Right	SECOND TESTING 30 min	Erector Spin	Lateral	Lying	Right	Relaxed	22.7	472	1.87	11.6	0.74	15	Fabio Valenti	000560	2024	1	2	7	Day
7.32398e+18	2024-01-14 16:56:06	5			1962-12-06	Female	165	55	20.2	Right	SECOND TESTING 30 min	Erector Spin	Lateral	Lying	Right	Relaxed	22.8	477	1.85	11.4	0.73	15	Fabio Valenti	000560	2024	1	2	7	Day
7.32398e+18	2024-01-14 16:56:44	1			1962-12-06	Female	165	55	20.2	Right	SECOND TESTING 30 min	Erector Spin	Lateral	Sitting	Left	Relaxed	16.9	417	1.53	12.5	0.79	15	Fabio Valenti	000560	2024	1	2	7	Day
7.32398e+18	2024-01-14 16:56:45	2			1962-12-06	Female	165	55	20.2	Right	SECOND TESTING 30 min	Erector Spin	Lateral	Sitting	Left	Relaxed	17.1	429	1.59	12.2	0.77	15	Fabio Valenti	000560	2024	1	2	7	Day
7.32398e+18	2024-01-14 16:56:46	3			1962-12-06	Female	165	55	20.2	Right	SECOND TESTING 30 min	Erector Spin	Lateral	Sitting	Left	Relaxed	17.1	423	1.54	12.3	0.77	15	Fabio Valenti	000560	2024	1	2	7	Day
7.32398e+18	2024-01-14 16:56:46	4			1962-12-06	Female	165	55	20.2	Right	SECOND TESTING 30 min	Erector Spin	Lateral	Sitting	Left	Relaxed	17.1	443	1.52	12	0.76	15	Fabio Valenti	000560	2024	1	2	7	Day
7.32398e+18	2024-01-14 16:56:47	5			1962-12-06	Female	165	55	20.2	Right	SECOND TESTING 30 min	Erector Spin	Lateral	Sitting	Left	Relaxed	17.1	445	1.53	11.8	0.75	15	Fabio Valenti	000560	2024	1	2	7	Day
7.32398e+18	2024-01-14 16:57:08	1			1962-12-06	Female	165	55	20.2	Right	SECOND TESTING 30 min	Erector Spin	Lateral	Sitting	Right	Relaxed	23.9	612	1.05	8.4	0.55	15	Fabio Valenti	000560	2024	1	2	7	Day
7.32398e+18	2024-01-14 16:57:08	2			1962-12-06	Female	165	55	20.2	Right	SECOND TESTING 30 min	Erector Spin	Lateral	Sitting	Right	Relaxed	23.8	618	1	8.4	0.55	15	Fabio Valenti	000560	2024	1	2	7	Day
7.32398e+18	2024-01-14 16:57:09	3			1962-12-06	Female	165	55	20.2	Right	SECOND TESTING 30 min	Erector Spin	Lateral	Sitting	Right	Relaxed	23	602	1.06	8.5	0.55	15	Fabio Valenti	000560	2024	1	2	7	Day
7.32398e+18	2024-01-14 16:57:10	4			1962-12-06	Female	165	55	20.2	Right	SECOND TESTING 30 min	Erector Spin	Lateral	Sitting	Right	Relaxed	22.8	592	1.06	8.5	0.55	15	Fabio Valenti	000560	2024	1	2	7	Day
7.32398e+18	2024-01-14 16:57:11	5			1962-12-06	Female	165	55	20.2	Right	SECOND TESTING 30 min	Erector Spin	Lateral	Sitting	Right	Relaxed	22.7	589	1.06	8.7	0.57	15	Fabio Valenti	000560	2024	1	2	7	Day
7.32435e+18	2024-01-15 16:47:51	1			1962-12-06	Female	165	55	20.2	Right	THIRD TEST 24h	Erector Spin	Lateral	Lying	Left	Relaxed	19.6	340	1.54	13.4	0.81	15	Fabio Valenti	000560	2024	1	3	1	Day
7.32435e+18	2024-01-15 16:47:52	2			1962-12-06	Female	165	55	20.2	Right	THIRD TEST 24h	Erector Spin	Lateral	Lying	Left	Relaxed	19.5	346	1.5	13.3	0.81	15	Fabio Valenti	000560	2024	1	3	1	Day
7.32435e+18	2024-01-15 16:47:53	3			1962-12-06	Female	165	55	20.2	Right	THIRD TEST 24h	Erector Spin	Lateral	Lying	Left	Relaxed	19.4	354	1.52	13.3	0.81	15	Fabio Valenti	000560	2024	1	3	1	Day
7.32435e+18	2024-01-15 16:47:53	4			1962-12-06	Female	165	55	20.2	Right	THIRD TEST 24h	Erector Spin	Lateral	Lying	Left	Relaxed	19.6	356	1.51	13.2	0.81	15	Fabio Valenti	000560	2024	1	3	1	Day
7.32435e+18	2024-01-15 16:47:54	5			1962-12-06	Female	165	55	20.2	Right	THIRD TEST 24h	Erector Spin	Lateral	Lying	Left	Relaxed	19.8	357	1.5	13.2	0.81	15	Fabio Valenti	000560	2024	1	3	1	Day
7.32435e+18	2024-01-15 16:48:02	1			1962-12-06	Female	165	55	20.2	Right	THIRD TEST 24h	Erector Spin	Lateral	Lying	Right	Relaxed	22.5	431	1.28	11.5	0.72	15	Fabio Valenti	000560	2024	1	3	1	Day
7.32435e+18	2024-01-15 16:48:03	2			1962-12-06	Female	165	55	20.2	Right	THIRD TEST 24h	Erector Spin	Lateral	Lying	Right	Relaxed	22.3	425	1.25	11.7	0.73	15	Fabio Valenti	000560	2024	1	3	1	Day
7.32435e+18	2024-01-15 16:48:04	3			1962-12-06	Female	165	55	20.2	Right	THIRD TEST 24h	Erector Spin	Lateral	Lying	Right	Relaxed	22.5	425	1.28	11.7	0.73	15	Fabio Valenti	000560	2024	1	3	1	Day
7.32435e+18	2024-01-15 16:48:04	4			1962-12-06	Female	165	55	20.2	Right	THIRD TEST 24h	Erector Spin	Lateral	Lying	Right	Relaxed	22.4	429	1.28	11.7	0.73	15	Fabio Valenti	000560	2024	1	3	1	Day
7.32435e+18	2024-01-15 16:48:05	5			1962-12-06	Female	165	55	20.2	Right	THIRD TEST 24h	Erector Spin	Lateral	Lying	Right	Relaxed	22.4	428	1.28	11.7	0.73	15	Fabio Valenti	000560	2024	1	3	1	Day
7.32435e+18	2024-01-15 16:48:31	1			1962-12-06	Female	165	55	20.2	Right	THIRD TEST 24h	Erector Spin	Lateral	Sitting	Left	Relaxed	22.5	461	1.41	11.2	0.71	15	Fabio Valenti	000560	2024	1	3	1	Day
7.32435e+18	2024-01-15 16:48:32	2			1962-12-06	Female	165	55	20.2	Right	THIRD TEST 24h	Erector Spin	Lateral	Sitting	Left	Relaxed	22.3	459	1.34	11.1	0.7	15	Fabio Valenti	000560	2024	1	3	1	Day
7.32435e+18	2024-01-15 16:48:32	3			1962-12-06	Female	165	55	20.2	Right	THIRD TEST 24h	Erector Spin	Lateral	Sitting	Left	Relaxed	22	462	1.35	11	0.69	15	Fabio Valenti	000560	2024	1	3	1	Day
7.32435e+18	2024-01-15 16:48:33	4			1962-12-06	Female	165	55	20.2	Right	THIRD TEST 24h	Erector Spin	Lateral	Sitting	Left	Relaxed	22.2	463	1.35	11	0.69	15	Fabio Valenti	000560	2024	1	3	1	Day
7.32435e+18	2024-01-15 16:48:34	5			1962-12-06	Female	165	55	20.2	Right	THIRD TEST 24h	Erector Spin	Lateral	Sitting	Left	Relaxed	22.1	465	1.35	10.9	0.69	15	Fabio Valenti	000560	2024	1	3	1	Day
7.32435e+18	2024-01-15 16:48:42	1			1962-12-06	Female	165	55	20.2	Right	THIRD TEST 24h	Erector Spin	Lateral	Sitting	Right	Relaxed	22.5	445	1.09	11.2	0.7	15	Fabio Valenti	000560	2024	1	3	1	Day
7.32435e+18	2024-01-15 16:48:43	2			1962-12-06	Female	165	55	20.2	Right	THIRD TEST 24h	Erector Spin	Lateral	Sitting	Right	Relaxed	22.6	445	1.11	11.2	0.7	15	Fabio Valenti	000560	2024	1	3	1	Day
7.32435e+18	2024-01-15 16:48:44	3			1962-12-06	Female	165	55	20.2	Right	THIRD TEST 24h	Erector Spin	Lateral	Sitting	Right	Relaxed	22.6	449	1.09	11.2	0.7	15	Fabio Valenti	000560	2024	1	3	1	Day
7.32435e+18	2024-01-15 16:48:44	4			1962-12-06	Female	165	55	20.2	Right	THIRD TEST 24h	Erector Spin	Lateral	Sitting	Right	Relaxed	22.8	453	1.07	11.2	0.7	15	Fabio Valenti	000560	2024	1	3	1	Day
7.32435e+18	2024-01-15 16:48:45	5			1962-12-06	Female	165	55	20.2	Right	THIRD TEST 24h	Erector Spin	Lateral	Sitting	Right	Relaxed	22.9	456	1.06	11.1	0.7	15	Fabio Valenti	000560	2024	1	3	1	Day
7.33024e+18	2024-01-31 13:23:40	1			1984-07-01	Male	175	75	24.5	Right	FIRST TEST	Erector Spin	Lateral	Lying	Left	Relaxed	16.8	344	0.99	15.5	0.96	15	Fabio Valenti	000560	2024	1	5	3	Day
7.33024e+18	2024-01-31 13:23:41	2			1984-07-01	Male	175	75	24.5	Right	FIRST TEST	Erector Spin	Lateral	Lying	Left	Relaxed	16.8	360	0.99	15.2	0.95	15	Fabio Valenti	000560	2024	1	5	3	Day
7.33024e+18	2024-01-31 13:23:42	3			1984-07-01	Male	175	75	24.5	Right	FIRST TEST	Erector Spin	Lateral	Lying	Left	Relaxed	16.9	365	0.98	14.9	0.93	15	Fabio Valenti	000560	2024	1	5	3	Day
7.33024e+18	2024-01-31 13:23:43	4			1984-07-01	Male	175	75	24.5	Right	FIRST TEST	Erector Spin	Lateral	Lying	Left	Relaxed	16.9	368	0.98	14.9	0.93	15	Fabio Valenti	000560	2024	1	5	3	Day
7.33024e+18	2024-01-31 13:23:43	5			1984-07-01	Male	175	75	24.5	Right	FIRST TEST	Erector Spin	Lateral	Lying	Left	Relaxed	16.9	369	0.99	14.9	0.93	15	Fabio Valenti	000560	2024	1	5	3	Day
7.33024e+18	2024-01-31 13:24:10	1			1984-07-01	Male	175	75	24.5	Right	FIRST TEST	Erector Spin	Lateral	Lying	Right	Relaxed	16.5	370	0.99	14.6	0.92	15	Fabio Valenti	000560	2024	1	5	3	Day
7.33024e+18	2024-01-31 13:24:11	2			1984-07-01	Male	175	75	24.5	Right	FIRST TEST	Erector Spin	Lateral	Lying	Right	Relaxed	16.5	372	0.97	14.6	0.92	15	Fabio Valenti	000560	2024	1	5	3	Day
7.33024e+18	2024-01-31 13:24:12	3			1984-07-01	Male	175	75	24.5	Right	FIRST TEST	Erector Spin	Lateral	Lying	Right	Relaxed	16.7	378	0.96	14.5	0.92	15	Fabio Valenti	000560	2024	1	5	3	Day
7.33024e+18	2024-01-31 13:24:13	4			1984-07-01	Male	175	75	24.5	Right	FIRST TEST	Erector Spin	Lateral	Lying	Right	Relaxed	16.6	369	0.96	14.9	0.94	15	Fabio Valenti	000560	2024	1	5	3	Day
7.33024e+18	2024-01-31 13:24:13	5			1984-07-01	Male	175	75	24.5	Right	FIRST TEST	Erector Spin	Lateral	Lying	Right	Relaxed	16.6	374	0.95	14.6	0.92	15	Fabio Valenti	000560	2024	1	5	3	Day
7.33024e+18	2024-01-31 13:24:48	1			1984-07-01	Male	175	75	24.5	Right	FIRST TEST	Erector Spin	Lateral	Sitting	Left	Relaxed	20.4	536	1	9.9	0.64	15	Fabio Valenti	000560	2024	1	5	3	Day
7.33024e+18	2024-01-31 13:24:49	2			1984-07-01	Male	175	75	24.5	Right	FIRST TEST	Erector Spin	Lateral	Sitting	Left	Relaxed	20.6	538	0.95	9.9	0.64	15	Fabio Valenti	000560	2024	1	5	3	Day
7.33024e+18	2024-01-31 13:24:50	3			1984-07-01	Male	175	75	24.5	Right	FIRST TEST	Erector Spin	Lateral	Sitting	Left	Relaxed	20.6	549	0.95	9.7	0.63	15	Fabio Valenti	000560	2024	1	5	3	Day
7.33024e+18	2024-01-31 13:24:51	4			1984-07-01	Male	175	75	24.5	Right	FIRST TEST	Erector Spin	Lateral	Sitting	Left	Relaxed	20.7	553	0.93	9.7	0.63	15	Fabio Valenti	000560	2024	1	5	3	Day
7.33024e+18	2024-01-31 13:24:51	5			1984-07-01	Male	175	75	24.5	Right	FIRST TEST	Erector Spin	Lateral	Sitting	Left	Relaxed	20.8	567	0.93	9.4	0.62	15	Fabio Valenti	000560	2024	1	5	3	Day
7.33024e+18	2024-01-31 13:25:02	1			1984-07-01	Male	175	75	24.5	Right	FIRST TEST	Erector Spin	Lateral	Sitting	Right	Relaxed	23.1	645	0.9	8.1	0.54	15	Fabio Valenti	000560	2024	1	5	3	Day
7.33024e+18	2024-01-31 13:25:03	2			1984-07-01	Male	175	75	24.5	Right	FIRST TEST	Erector Spin	Lateral	Sitting	Right	Relaxed	22.7	655	0.87	8	0.54	15	Fabio Valenti	000560	2024	1	5	3	Day
7.33024e+18	2024-01-31 13:25:03	3			1984-07-01	Male	175	75	24.5	Right	FIRST TEST	Erector Spin	Lateral	Sitting	Right	Relaxed	22.9	655	0.86	8	0.54	15	Fabio Valenti	000560	2024	1	5	3	Day
7.33024e+18	2024-01-31 13:25:04	4			1984-07-01	Male	175	75	24.5	Right	FIRST TEST	Erector Spin	Lateral	Sitting	Right	Relaxed	23	660	0.85	8	0.54	15	Fabio Valenti	000560	2024	1	5	3	Day
7.33024e+18	2024-01-31 13:25:05	5			1984-07-01	Male	175	75	24.5	Right	FIRST TEST	Erector Spin	Lateral	Sitting	Right	Relaxed	23.1	656	0.88	8.1	0.54	15	Fabio Valenti	000560	2024	1	5	3	Day
7.33025e+18	2024-01-31 14:01:45	1			1984-07-01	Male	175	75	24.5	Right	SECOND TESTING 30 min	Erector Spin	Lateral	Lying	Left	Relaxed	16.3	333	0.95	16	0.98	15	Fabio Valenti	000560	2024	1	5	3	Day
7.33025e+18	2024-01-31 14:01:46	2			1984-07-01	Male	175	75	24.5	Right	SECOND TESTING 30 min	Erector Spin	Lateral	Lying	Left	Relaxed	16.3	338	0.91	15.9	0.97	15	Fabio Valenti	000560	2024	1	5	3	Day
7.33025e+18	2024-01-31 14:01:46	3			1984-07-01	Male	175	75	24.5	Right	SECOND TESTING 30 min	Erector Spin	Lateral	Lying	Left	Relaxed	16.3	349	0.9	15.7	0.96	15	Fabio Valenti	000560	2024	1	5	3	Day
7.33025e+18	2024-01-31 14:01:47	4			1984-07-01	Male	175	75	24.5	Right	SECOND TESTING 30 min	Erector Spin	Lateral	Lying	Left	Relaxed	16.4	352	0.9	15.6	0.96	15	Fabio Valenti	000560	2024	1	5	3	Day
7.33025e+18	2024-01-31 14:01:48	5			1984-07-01	Male	175	75	24.5	Right	SECOND TESTING 30 min	Erector Spin	Lateral	Lying	Left	Relaxed	16.5	353	0.9	15.4	0.94	15	Fabio Valenti	000560	2024	1	5	3	Day
7.33025e+18	2024-01-31 14:01:56	1			1984-07-01	Male	175	75	24.5	Right	SECOND TESTING 30 min	Erector Spin	Lateral	Lying	Right	Relaxed	16.7	394	1.21	14.3	0.9	15	Fabio Valenti	000560	2024	1	5	3	Day
7.33025e+18	2024-01-31 14:01:57	2			1984-07-01	Male	175	75	24.5	Right	SECOND TESTING 30 min	Erector Spin	Lateral	Lying	Right	Relaxed	16.8	404	1.21	14	0.88	15	Fabio Valenti	000560	2024	1	5	3	Day
7.33025e+18	2024-01-31 14:01:58	3			1984-07-01	Male	175	75	24.5	Right	SECOND TESTING 30 min	Erector Spin	Lateral	Lying	Right	Relaxed	16.8	403	1.18	14	0.88	15	Fabio Valenti	000560	2024	1	5	3	Day
7.33025e+18	2024-01-31 14:01:58	4			1984-07-01	Male	175	75	24.5	Right	SECOND TESTING 30 min	Erector Spin	Lateral	Lying	Right	Relaxed	16.9	404	1.17	13.9	0.88	15	Fabio Valenti	000560	2024	1	5	3	Day
7.33025e+18	2024-01-31 14:01:59	5			1984-07-01	Male	175	75	24.5	Right	SECOND TESTING 30 min	Erector Spin	Lateral	Lying	Right	Relaxed	17	412	1.17	13.5	0.85	15	Fabio Valenti	000560	2024	1	5	3	Day
7.33025e+18	2024-01-31 14:02:36	1			1984-07-01	Male	175	75	24.5	Right	SECOND TESTING 30 min	Erector Spin	Lateral	Sitting	Left	Relaxed	21	555	0.98	9.7	0.62	15	Fabio Valenti	000560	2024	1	5	3	Day
7.33025e+18	2024-01-31 14:02:36	2			1984-07-01	Male	175	75	24.5	Right	SECOND TESTING 30 min	Erector Spin	Lateral	Sitting	Left	Relaxed	21	572	0.98	9.3	0.6	15	Fabio Valenti	000560	2024	1	5	3	Day
7.33025e+18	2024-01-31 14:02:37	3			1984-07-01	Male	175	75	24.5	Right	SECOND TESTING 30 min	Erector Spin	Lateral	Sitting	Left	Relaxed	20.8	583	0.97	9.2	0.6	15	Fabio Valenti	000560	2024	1	5	3	Day
7.33025e+18	2024-01-31 14:02:38	4			1984-07-01	Male	175	75	24.5	Right	SECOND TESTING 30 min	Erector Spin	Lateral	Sitting	Left	Relaxed	20.9	589	0.97	9.2	0.6	15	Fabio Valenti	000560	2024	1	5	3	Day
7.33025e+18	2024-01-31 14:02:38	5			1984-07-01	Male	175	75	24.5	Right	SECOND TESTING 30 min	Erector Spin	Lateral	Sitting	Left	Relaxed	21.1	591	0.97	9.1	0.59	15	Fabio Valenti	000560	2024	1	5	3	Day
7.33025e+18	2024-01-31 14:03:09	1			1984-07-01	Male	175	75	24.5	Right	SECOND TESTING 30 min	Erector Spin	Lateral	Sitting	Right	Relaxed	23.3	667	0.93	7.8	0.51	15	Fabio Valenti	000560	2024	1	5	3	Day
7.33025e+18	2024-01-31 14:03:09	2			1984-07-01	Male	175	75	24.5	Right	SECOND TESTING 30 min	Erector Spin	Lateral	Sitting	Right	Relaxed	23.3	676	0.93	7.7	0.51	15	Fabio Valenti	000560	2024	1	5	3	Day
7.33025e+18	2024-01-31 14:03:10	3			1984-07-01	Male	175	75	24.5	Right	SECOND TESTING 30 min	Erector Spin	Lateral	Sitting	Right	Relaxed	23.1	667	0.91	7.9	0.52	15	Fabio Valenti	000560	2024	1	5	3	Day
7.33025e+18	2024-01-31 14:03:11	4			1984-07-01	Male	175	75	24.5	Right	SECOND TESTING 30 min	Erector Spin	Lateral	Sitting	Right	Relaxed	23.2	675	0.9	7.8	0.52	15	Fabio Valenti	000560	2024	1	5	3	Day
7.33025e+18	2024-01-31 14:03:11	5			1984-07-01	Male	175	75	24.5	Right	SECOND TESTING 30 min	Erector Spin	Lateral	Sitting	Right	Relaxed	23.1	671	0.88	7.8	0.52	15	Fabio Valenti	000560	2024	1	5	3	Day
7.33061e+18	2024-02-01 13:16:01	1			1984-07-01	Male	175	75	24.5	Right	THIRD TEST 24h	Erector Spin	Lateral	Lying	Left	Relaxed	16.8	364	1.06	14.9	0.93	15	Fabio Valenti	000560	2024	2	5	4	Day
7.33061e+18	2024-02-01 13:16:02	2			1984-07-01	Male	175	75	24.5	Right	THIRD TEST 24h	Erector Spin	Lateral	Lying	Left	Relaxed	16.8	369	1.03	14.9	0.93	15	Fabio Valenti	000560	2024	2	5	4	Day
7.33061e+18	2024-02-01 13:16:02	3			1984-07-01	Male	175	75	24.5	Right	THIRD TEST 24h	Erector Spin	Lateral	Lying	Left	Relaxed	16.9	374	1.03	14.8	0.93	15	Fabio Valenti	000560	2024	2	5	4	Day
7.33061e+18	2024-02-01 13:16:03	4			1984-07-01	Male	175	75	24.5	Right	THIRD TEST 24h	Erector Spin	Lateral	Lying	Left	Relaxed	16.9	376	1.02	14.6	0.92	15	Fabio Valenti	000560	2024	2	5	4	Day
7.33061e+18	2024-02-01 13:16:04	5			1984-07-01	Male	175	75	24.5	Right	THIRD TEST 24h	Erector Spin	Lateral	Lying	Left	Relaxed	17	379	1.02	14.5	0.91	15	Fabio Valenti	000560	2024	2	5	4	Day
7.33061e+18	2024-02-01 13:16:15	1			1984-07-01	Male	175	75	24.5	Right	THIRD TEST 24h	Erector Spin	Lateral	Lying	Right	Relaxed	16.9	384	1.09	14.4	0.91	15	Fabio Valenti	000560	2024	2	5	4	Day
7.33061e+18	2024-02-01 13:16:16	2			1984-07-01	Male	175	75	24.5	Right	THIRD TEST 24h	Erector Spin	Lateral	Lying	Right	Relaxed	17	392	1.05	14.1	0.89	15	Fabio Valenti	000560	2024	2	5	4	Day
7.33061e+18	2024-02-01 13:16:16	3			1984-07-01	Male	175	75	24.5	Right	THIRD TEST 24h	Erector Spin	Lateral	Lying	Right	Relaxed	17.1	406	1.05	13.9	0.89	15	Fabio Valenti	000560	2024	2	5	4	Day
7.33061e+18	2024-02-01 13:16:17	4			1984-07-01	Male	175	75	24.5	Right	THIRD TEST 24h	Erector Spin	Lateral	Lying	Right	Relaxed	17.2	401	1.04	13.8	0.88	15	Fabio Valenti	000560	2024	2	5	4	Day
7.33061e+18	2024-02-01 13:16:18	5			1984-07-01	Male	175	75	24.5	Right	THIRD TEST 24h	Erector Spin	Lateral	Lying	Right	Relaxed	17.2	402	1.03	13.8	0.88	15	Fabio Valenti	000560	2024	2	5	4	Day
7.33061e+18	2024-02-01 13:17:09	1			1984-07-01	Male	175	75	24.5	Right	THIRD TEST 24h	Erector Spin	Lateral	Sitting	Left	Relaxed	19.1	566	1.03	9.7	0.64	15	Fabio Valenti	000560	2024	2	5	4	Day
7.33061e+18	2024-02-01 13:17:09	2			1984-07-01	Male	175	75	24.5	Right	THIRD TEST 24h	Erector Spin	Lateral	Sitting	Left	Relaxed	18.9	555	1.01	10	0.66	15	Fabio Valenti	000560	2024	2	5	4	Day
7.33061e+18	2024-02-01 13:17:10	3			1984-07-01	Male	175	75	24.5	Right	THIRD TEST 24h	Erector Spin	Lateral	Sitting	Left	Relaxed	19.3	549	1.01	10	0.65	15	Fabio Valenti	000560	2024	2	5	4	Day
7.33061e+18	2024-02-01 13:17:11	4			1984-07-01	Male	175	75	24.5	Right	THIRD TEST 24h	Erector Spin	Lateral	Sitting	Left	Relaxed	19.2	548	1	10	0.65	15	Fabio Valenti	000560	2024	2	5	4	Day
7.33061e+18	2024-02-01 13:17:12	5			1984-07-01	Male	175	75	24.5	Right	THIRD TEST 24h	Erector Spin	Lateral	Sitting	Left	Relaxed	19.4	547	1.01	10	0.65	15	Fabio Valenti	000560	2024	2	5	4	Day
7.33061e+18	2024-02-01 13:17:41	1			1984-07-01	Male	175	75	24.5	Right	THIRD TEST 24h	Erector Spin	Lateral	Sitting	Right	Relaxed	21.4	566	1.02	9.4	0.62	15	Fabio Valenti	000560	2024	2	5	4	Day
7.33061e+18	2024-02-01 13:17:42	2			1984-07-01	Male	175	75	24.5	Right	THIRD TEST 24h	Erector Spin	Lateral	Sitting	Right	Relaxed	21.6	590	1.03	9	0.6	15	Fabio Valenti	000560	2024	2	5	4	Day
7.33061e+18	2024-02-01 13:17:43	3			1984-07-01	Male	175	75	24.5	Right	THIRD TEST 24h	Erector Spin	Lateral	Sitting	Right	Relaxed	21.9	596	1	8.9	0.59	15	Fabio Valenti	000560	2024	2	5	4	Day
7.33061e+18	2024-02-01 13:17:44	4			1984-07-01	Male	175	75	24.5	Right	THIRD TEST 24h	Erector Spin	Lateral	Sitting	Right	Relaxed	21.4	598	1	8.7	0.58	15	Fabio Valenti	000560	2024	2	5	4	Day
7.33061e+18	2024-02-01 13:17:44	5			1984-07-01	Male	175	75	24.5	Right	THIRD TEST 24h	Erector Spin	Lateral	Sitting	Right	Relaxed	21.6	594	0.98	8.9	0.59	15	Fabio Valenti	000560	2024	2	5	4	Day
7.32276e+18	2024-01-11 09:58:05	1			1992-07-27	Female	165	50	18.4	Right	FIRST TEST	Erector Spin	Lateral	Lying	Left	Relaxed	19.3	563	1.28	9.7	0.64	15	Fabio Valenti	000560	2024	1	2	4	Morning
7.32276e+18	2024-01-11 09:58:05	2			1992-07-27	Female	165	50	18.4	Right	FIRST TEST	Erector Spin	Lateral	Lying	Left	Relaxed	18.8	569	1.26	9.8	0.65	15	Fabio Valenti	000560	2024	1	2	4	Morning
7.32276e+18	2024-01-11 09:58:06	3			1992-07-27	Female	165	50	18.4	Right	FIRST TEST	Erector Spin	Lateral	Lying	Left	Relaxed	18.6	568	1.26	9.9	0.65	15	Fabio Valenti	000560	2024	1	2	4	Morning
7.32276e+18	2024-01-11 09:58:07	4			1992-07-27	Female	165	50	18.4	Right	FIRST TEST	Erector Spin	Lateral	Lying	Left	Relaxed	18.6	566	1.25	9.9	0.65	15	Fabio Valenti	000560	2024	1	2	4	Morning
7.32276e+18	2024-01-11 09:58:07	5			1992-07-27	Female	165	50	18.4	Right	FIRST TEST	Erector Spin	Lateral	Lying	Left	Relaxed	18.8	576	1.23	9.7	0.64	15	Fabio Valenti	000560	2024	1	2	4	Morning
7.32276e+18	2024-01-11 09:58:19	1			1992-07-27	Female	165	50	18.4	Right	FIRST TEST	Erector Spin	Lateral	Lying	Right	Relaxed	22.2	673	1.17	8	0.54	15	Fabio Valenti	000560	2024	1	2	4	Morning
7.32276e+18	2024-01-11 09:58:20	2			1992-07-27	Female	165	50	18.4	Right	FIRST TEST	Erector Spin	Lateral	Lying	Right	Relaxed	21.9	698	1.12	7.8	0.53	15	Fabio Valenti	000560	2024	1	2	4	Morning
7.32276e+18	2024-01-11 09:58:20	3			1992-07-27	Female	165	50	18.4	Right	FIRST TEST	Erector Spin	Lateral	Lying	Right	Relaxed	21.8	698	1.13	7.8	0.53	15	Fabio Valenti	000560	2024	1	2	4	Morning
7.32276e+18	2024-01-11 09:58:21	4			1992-07-27	Female	165	50	18.4	Right	FIRST TEST	Erector Spin	Lateral	Lying	Right	Relaxed	22	701	1.13	7.7	0.52	15	Fabio Valenti	000560	2024	1	2	4	Morning
7.32276e+18	2024-01-11 09:58:22	5			1992-07-27	Female	165	50	18.4	Right	FIRST TEST	Erector Spin	Lateral	Lying	Right	Relaxed	21.9	696	1.18	7.8	0.53	15	Fabio Valenti	000560	2024	1	2	4	Morning
7.32276e+18	2024-01-11 10:00:27	1			1992-07-27	Female	165	50	18.4	Right	FIRST TEST	Erector Spin	Lateral	Sitting	Left	Relaxed	28.1	857	0.76	6	0.41	15	Fabio Valenti	000560	2024	1	2	4	Morning
7.32276e+18	2024-01-11 10:00:28	2			1992-07-27	Female	165	50	18.4	Right	FIRST TEST	Erector Spin	Lateral	Sitting	Left	Relaxed	27.9	855	0.74	6	0.41	15	Fabio Valenti	000560	2024	1	2	4	Morning
7.32276e+18	2024-01-11 10:00:29	3			1992-07-27	Female	165	50	18.4	Right	FIRST TEST	Erector Spin	Lateral	Sitting	Left	Relaxed	27.7	859	0.73	6	0.41	15	Fabio Valenti	000560	2024	1	2	4	Morning
7.32276e+18	2024-01-11 10:00:29	4			1992-07-27	Female	165	50	18.4	Right	FIRST TEST	Erector Spin	Lateral	Sitting	Left	Relaxed	27.7	856	0.75	6	0.41	15	Fabio Valenti	000560	2024	1	2	4	Morning
7.32276e+18	2024-01-11 10:00:30	5			1992-07-27	Female	165	50	18.4	Right	FIRST TEST	Erector Spin	Lateral	Sitting	Left	Relaxed	27.5	847	0.74	6	0.41	15	Fabio Valenti	000560	2024	1	2	4	Morning
7.32276e+18	2024-01-11 10:01:45	1			1992-07-27	Female	165	50	18.4	Right	FIRST TEST	Erector Spin	Lateral	Sitting	Right	Relaxed	29.7	880	0.74	5.5	0.38	15	Fabio Valenti	000560	2024	1	2	4	Morning
7.32276e+18	2024-01-11 10:01:45	2			1992-07-27	Female	165	50	18.4	Right	FIRST TEST	Erector Spin	Lateral	Sitting	Right	Relaxed	29.1	863	0.76	5.7	0.4	15	Fabio Valenti	000560	2024	1	2	4	Morning
7.32276e+18	2024-01-11 10:01:46	3			1992-07-27	Female	165	50	18.4	Right	FIRST TEST	Erector Spin	Lateral	Sitting	Right	Relaxed	29.5	872	0.74	5.6	0.39	15	Fabio Valenti	000560	2024	1	2	4	Morning
7.32276e+18	2024-01-11 10:01:47	4			1992-07-27	Female	165	50	18.4	Right	FIRST TEST	Erector Spin	Lateral	Sitting	Right	Relaxed	29.8	884	0.72	5.5	0.39	15	Fabio Valenti	000560	2024	1	2	4	Morning
7.32276e+18	2024-01-11 10:01:47	5			1992-07-27	Female	165	50	18.4	Right	FIRST TEST	Erector Spin	Lateral	Sitting	Right	Relaxed	29.7	882	0.71	5.5	0.39	15	Fabio Valenti	000560	2024	1	2	4	Morning
7.32277e+18	2024-01-11 10:41:18	1			1992-07-27	Female	165	50	18.4	Right	SECOND TESTING 30 min	Erector Spin	Lateral	Lying	Left	Relaxed	18.9	520	1.33	10.5	0.68	15	Fabio Valenti	000560	2024	1	2	4	Morning
7.32277e+18	2024-01-11 10:41:19	2			1992-07-27	Female	165	50	18.4	Right	SECOND TESTING 30 min	Erector Spin	Lateral	Lying	Left	Relaxed	18.8	532	1.32	10.5	0.68	15	Fabio Valenti	000560	2024	1	2	4	Morning
7.32277e+18	2024-01-11 10:41:20	3			1992-07-27	Female	165	50	18.4	Right	SECOND TESTING 30 min	Erector Spin	Lateral	Lying	Left	Relaxed	18.7	535	1.29	10.4	0.67	15	Fabio Valenti	000560	2024	1	2	4	Morning
7.32277e+18	2024-01-11 10:41:20	4			1992-07-27	Female	165	50	18.4	Right	SECOND TESTING 30 min	Erector Spin	Lateral	Lying	Left	Relaxed	18.7	538	1.31	10.3	0.67	15	Fabio Valenti	000560	2024	1	2	4	Morning
7.32277e+18	2024-01-11 10:41:21	5			1992-07-27	Female	165	50	18.4	Right	SECOND TESTING 30 min	Erector Spin	Lateral	Lying	Left	Relaxed	18.7	543	1.28	10.3	0.67	15	Fabio Valenti	000560	2024	1	2	4	Morning
7.32277e+18	2024-01-11 10:41:44	1			1992-07-27	Female	165	50	18.4	Right	SECOND TESTING 30 min	Erector Spin	Lateral	Lying	Right	Relaxed	19.5	539	1.26	10.2	0.66	15	Fabio Valenti	000560	2024	1	2	4	Morning
7.32277e+18	2024-01-11 10:41:45	2			1992-07-27	Female	165	50	18.4	Right	SECOND TESTING 30 min	Erector Spin	Lateral	Lying	Right	Relaxed	19.5	547	1.24	10.2	0.66	15	Fabio Valenti	000560	2024	1	2	4	Morning
7.32277e+18	2024-01-11 10:41:46	3			1992-07-27	Female	165	50	18.4	Right	SECOND TESTING 30 min	Erector Spin	Lateral	Lying	Right	Relaxed	19.6	545	1.23	10.2	0.66	15	Fabio Valenti	000560	2024	1	2	4	Morning
7.32277e+18	2024-01-11 10:41:46	4			1992-07-27	Female	165	50	18.4	Right	SECOND TESTING 30 min	Erector Spin	Lateral	Lying	Right	Relaxed	19.6	555	1.23	10.2	0.66	15	Fabio Valenti	000560	2024	1	2	4	Morning
7.32277e+18	2024-01-11 10:41:47	5			1992-07-27	Female	165	50	18.4	Right	SECOND TESTING 30 min	Erector Spin	Lateral	Lying	Right	Relaxed	19.7	555	1.22	10.1	0.65	15	Fabio Valenti	000560	2024	1	2	4	Morning
7.32277e+18	2024-01-11 10:42:08	1			1992-07-27	Female	165	50	18.4	Right	SECOND TESTING 30 min	Erector Spin	Lateral	Sitting	Left	Relaxed	30.3	898	0.72	5.5	0.38	15	Fabio Valenti	000560	2024	1	2	4	Morning
7.32277e+18	2024-01-11 10:42:09	2			1992-07-27	Female	165	50	18.4	Right	SECOND TESTING 30 min	Erector Spin	Lateral	Sitting	Left	Relaxed	30.8	890	0.74	5.3	0.37	15	Fabio Valenti	000560	2024	1	2	4	Morning
7.32277e+18	2024-01-11 10:42:10	3			1992-07-27	Female	165	50	18.4	Right	SECOND TESTING 30 min	Erector Spin	Lateral	Sitting	Left	Relaxed	30.4	886	0.73	5.4	0.38	15	Fabio Valenti	000560	2024	1	2	4	Morning
7.32277e+18	2024-01-11 10:42:10	4			1992-07-27	Female	165	50	18.4	Right	SECOND TESTING 30 min	Erector Spin	Lateral	Sitting	Left	Relaxed	30.6	892	0.7	5.4	0.38	15	Fabio Valenti	000560	2024	1	2	4	Morning
7.32277e+18	2024-01-11 10:42:11	5			1992-07-27	Female	165	50	18.4	Right	SECOND TESTING 30 min	Erector Spin	Lateral	Sitting	Left	Relaxed	30.1	886	0.71	5.4	0.38	15	Fabio Valenti	000560	2024	1	2	4	Morning
7.32277e+18	2024-01-11 10:44:01	1			1992-07-27	Female	165	50	18.4	Right	SECOND TESTING 30 min	Erector Spin	Lateral	Sitting	Right	Relaxed	26.2	837	0.94	6.3	0.44	15	Fabio Valenti	000560	2024	1	2	4	Morning
7.32277e+18	2024-01-11 10:44:01	2			1992-07-27	Female	165	50	18.4	Right	SECOND TESTING 30 min	Erector Spin	Lateral	Sitting	Right	Relaxed	26.1	854	0.91	6	0.42	15	Fabio Valenti	000560	2024	1	2	4	Morning
7.32277e+18	2024-01-11 10:44:02	3			1992-07-27	Female	165	50	18.4	Right	SECOND TESTING 30 min	Erector Spin	Lateral	Sitting	Right	Relaxed	26.3	865	0.89	6	0.43	15	Fabio Valenti	000560	2024	1	2	4	Morning
7.32277e+18	2024-01-11 10:44:03	4			1992-07-27	Female	165	50	18.4	Right	SECOND TESTING 30 min	Erector Spin	Lateral	Sitting	Right	Relaxed	26.3	861	0.89	6.1	0.43	15	Fabio Valenti	000560	2024	1	2	4	Morning
7.32277e+18	2024-01-11 10:44:04	5			1992-07-27	Female	165	50	18.4	Right	SECOND TESTING 30 min	Erector Spin	Lateral	Sitting	Right	Relaxed	26.3	862	0.9	6.2	0.44	15	Fabio Valenti	000560	2024	1	2	4	Morning
7.32314e+18	2024-01-12 10:05:14	1			1992-07-27	Female	165	50	18.4	Right	THIRD TEST 24h	Erector Spin	Lateral	Lying	Left	Relaxed	24.6	761	1	6.8	0.47	15	Fabio Valenti	000560	2024	1	2	5	Morning
7.32314e+18	2024-01-12 10:05:14	2			1992-07-27	Female	165	50	18.4	Right	THIRD TEST 24h	Erector Spin	Lateral	Lying	Left	Relaxed	24.5	764	0.97	6.8	0.47	15	Fabio Valenti	000560	2024	1	2	5	Morning
7.32314e+18	2024-01-12 10:05:15	3			1992-07-27	Female	165	50	18.4	Right	THIRD TEST 24h	Erector Spin	Lateral	Lying	Left	Relaxed	24.5	773	0.94	6.8	0.47	15	Fabio Valenti	000560	2024	1	2	5	Morning
7.32314e+18	2024-01-12 10:05:16	4			1992-07-27	Female	165	50	18.4	Right	THIRD TEST 24h	Erector Spin	Lateral	Lying	Left	Relaxed	24.7	778	0.93	6.8	0.47	15	Fabio Valenti	000560	2024	1	2	5	Morning
7.32314e+18	2024-01-12 10:05:17	5			1992-07-27	Female	165	50	18.4	Right	THIRD TEST 24h	Erector Spin	Lateral	Lying	Left	Relaxed	24.3	778	0.94	6.8	0.47	15	Fabio Valenti	000560	2024	1	2	5	Morning
7.32314e+18	2024-01-12 10:05:25	1			1992-07-27	Female	165	50	18.4	Right	THIRD TEST 24h	Erector Spin	Lateral	Lying	Right	Relaxed	22.7	654	1.15	8.2	0.55	15	Fabio Valenti	000560	2024	1	2	5	Morning
7.32314e+18	2024-01-12 10:05:26	2			1992-07-27	Female	165	50	18.4	Right	THIRD TEST 24h	Erector Spin	Lateral	Lying	Right	Relaxed	22.7	659	1.13	8.2	0.55	15	Fabio Valenti	000560	2024	1	2	5	Morning
7.32314e+18	2024-01-12 10:05:26	3			1992-07-27	Female	165	50	18.4	Right	THIRD TEST 24h	Erector Spin	Lateral	Lying	Right	Relaxed	22.9	651	1.11	8.3	0.56	15	Fabio Valenti	000560	2024	1	2	5	Morning
7.32314e+18	2024-01-12 10:05:27	4			1992-07-27	Female	165	50	18.4	Right	THIRD TEST 24h	Erector Spin	Lateral	Lying	Right	Relaxed	23.1	658	1.1	8.2	0.55	15	Fabio Valenti	000560	2024	1	2	5	Morning
7.32314e+18	2024-01-12 10:05:28	5			1992-07-27	Female	165	50	18.4	Right	THIRD TEST 24h	Erector Spin	Lateral	Lying	Right	Relaxed	23.1	667	1.11	8	0.54	15	Fabio Valenti	000560	2024	1	2	5	Morning
7.32314e+18	2024-01-12 10:05:52	1			1992-07-27	Female	165	50	18.4	Right	THIRD TEST 24h	Erector Spin	Lateral	Sitting	Left	Relaxed	22.6	629	1.03	8.4	0.56	15	Fabio Valenti	000560	2024	1	2	5	Morning
7.32314e+18	2024-01-12 10:05:53	2			1992-07-27	Female	165	50	18.4	Right	THIRD TEST 24h	Erector Spin	Lateral	Sitting	Left	Relaxed	22.6	640	1	8.4	0.56	15	Fabio Valenti	000560	2024	1	2	5	Morning
7.32314e+18	2024-01-12 10:05:54	3			1992-07-27	Female	165	50	18.4	Right	THIRD TEST 24h	Erector Spin	Lateral	Sitting	Left	Relaxed	22.5	631	1.03	8.5	0.57	15	Fabio Valenti	000560	2024	1	2	5	Morning
7.32314e+18	2024-01-12 10:05:55	4			1992-07-27	Female	165	50	18.4	Right	THIRD TEST 24h	Erector Spin	Lateral	Sitting	Left	Relaxed	22.5	636	1.01	8.4	0.56	15	Fabio Valenti	000560	2024	1	2	5	Morning
7.32314e+18	2024-01-12 10:05:55	5			1992-07-27	Female	165	50	18.4	Right	THIRD TEST 24h	Erector Spin	Lateral	Sitting	Left	Relaxed	22.5	648	1	8.3	0.56	15	Fabio Valenti	000560	2024	1	2	5	Morning
7.32314e+18	2024-01-12 10:07:27	1			1992-07-27	Female	165	50	18.4	Right	THIRD TEST 24h	Erector Spin	Lateral	Sitting	Right	Relaxed	22.3	593	0.94	9.2	0.59	15	Fabio Valenti	000560	2024	1	2	5	Morning
7.32314e+18	2024-01-12 10:07:29	2			1992-07-27	Female	165	50	18.4	Right	THIRD TEST 24h	Erector Spin	Lateral	Sitting	Right	Relaxed	21.8	592	0.91	9.2	0.59	15	Fabio Valenti	000560	2024	1	2	5	Morning
7.32314e+18	2024-01-12 10:07:30	3			1992-07-27	Female	165	50	18.4	Right	THIRD TEST 24h	Erector Spin	Lateral	Sitting	Right	Relaxed	21.7	594	0.89	9.2	0.59	15	Fabio Valenti	000560	2024	1	2	5	Morning
7.32314e+18	2024-01-12 10:07:31	4			1992-07-27	Female	165	50	18.4	Right	THIRD TEST 24h	Erector Spin	Lateral	Sitting	Right	Relaxed	21.6	596	0.9	9.2	0.59	15	Fabio Valenti	000560	2024	1	2	5	Morning
7.32314e+18	2024-01-12 10:07:31	5			1992-07-27	Female	165	50	18.4	Right	THIRD TEST 24h	Erector Spin	Lateral	Sitting	Right	Relaxed	21.7	596	0.9	9.2	0.59	15	Fabio Valenti	000560	2024	1	2	5	Morning
7.32278e+18	2024-01-11 11:20:16	1			1973-07-19	Female	157	50	20.3	Right	FIRST TEST	Erector Spin	Lateral	Lying	Left	Relaxed	17.2	341	1.03	15.8	0.98	15	Fabio Valenti	000560	2024	1	2	4	Morning
7.32278e+18	2024-01-11 11:20:17	2			1973-07-19	Female	157	50	20.3	Right	FIRST TEST	Erector Spin	Lateral	Lying	Left	Relaxed	17.1	340	1.03	15.7	0.97	15	Fabio Valenti	000560	2024	1	2	4	Morning
7.32278e+18	2024-01-11 11:20:17	3			1973-07-19	Female	157	50	20.3	Right	FIRST TEST	Erector Spin	Lateral	Lying	Left	Relaxed	17.6	352	0.99	15.2	0.94	15	Fabio Valenti	000560	2024	1	2	4	Morning
7.32278e+18	2024-01-11 11:20:18	4			1973-07-19	Female	157	50	20.3	Right	FIRST TEST	Erector Spin	Lateral	Lying	Left	Relaxed	17.5	358	1	15	0.93	15	Fabio Valenti	000560	2024	1	2	4	Morning
7.32278e+18	2024-01-11 11:20:19	5			1973-07-19	Female	157	50	20.3	Right	FIRST TEST	Erector Spin	Lateral	Lying	Left	Relaxed	17.1	337	1.03	16	0.99	15	Fabio Valenti	000560	2024	1	2	4	Morning
7.32278e+18	2024-01-11 11:21:21	1			1973-07-19	Female	157	50	20.3	Right	FIRST TEST	Erector Spin	Lateral	Lying	Right	Relaxed	14.5	263	1.12	20.1	1.22	15	Fabio Valenti	000560	2024	1	2	4	Morning
7.32278e+18	2024-01-11 11:21:22	2			1973-07-19	Female	157	50	20.3	Right	FIRST TEST	Erector Spin	Lateral	Lying	Right	Relaxed	14.3	263	1.08	20.4	1.24	15	Fabio Valenti	000560	2024	1	2	4	Morning
7.32278e+18	2024-01-11 11:21:22	3			1973-07-19	Female	157	50	20.3	Right	FIRST TEST	Erector Spin	Lateral	Lying	Right	Relaxed	14.4	262	1.08	20.4	1.24	15	Fabio Valenti	000560	2024	1	2	4	Morning
7.32278e+18	2024-01-11 11:21:23	4			1973-07-19	Female	157	50	20.3	Right	FIRST TEST	Erector Spin	Lateral	Lying	Right	Relaxed	14.4	270	1.05	20.2	1.23	15	Fabio Valenti	000560	2024	1	2	4	Morning
7.32278e+18	2024-01-11 11:21:24	5			1973-07-19	Female	157	50	20.3	Right	FIRST TEST	Erector Spin	Lateral	Lying	Right	Relaxed	14.5	265	1.04	20	1.22	15	Fabio Valenti	000560	2024	1	2	4	Morning
7.32278e+18	2024-01-11 11:22:06	1			1973-07-19	Female	157	50	20.3	Right	FIRST TEST	Erector Spin	Lateral	Sitting	Left	Relaxed	19.5	498	1.06	10.5	0.68	15	Fabio Valenti	000560	2024	1	2	4	Morning
7.32278e+18	2024-01-11 11:22:07	2			1973-07-19	Female	157	50	20.3	Right	FIRST TEST	Erector Spin	Lateral	Sitting	Left	Relaxed	19.3	504	1.03	10.5	0.68	15	Fabio Valenti	000560	2024	1	2	4	Morning
7.32278e+18	2024-01-11 11:22:08	3			1973-07-19	Female	157	50	20.3	Right	FIRST TEST	Erector Spin	Lateral	Sitting	Left	Relaxed	19.3	513	1.03	10.4	0.67	15	Fabio Valenti	000560	2024	1	2	4	Morning
7.32278e+18	2024-01-11 11:22:08	4			1973-07-19	Female	157	50	20.3	Right	FIRST TEST	Erector Spin	Lateral	Sitting	Left	Relaxed	19.1	507	1.04	10.4	0.67	15	Fabio Valenti	000560	2024	1	2	4	Morning
7.32278e+18	2024-01-11 11:22:09	5			1973-07-19	Female	157	50	20.3	Right	FIRST TEST	Erector Spin	Lateral	Sitting	Left	Relaxed	19.2	509	1.03	10.5	0.68	15	Fabio Valenti	000560	2024	1	2	4	Morning
7.32278e+18	2024-01-11 11:22:51	1			1973-07-19	Female	157	50	20.3	Right	FIRST TEST	Erector Spin	Lateral	Sitting	Right	Relaxed	20.7	496	0.96	10.6	0.68	15	Fabio Valenti	000560	2024	1	2	4	Morning
7.32278e+18	2024-01-11 11:22:52	2			1973-07-19	Female	157	50	20.3	Right	FIRST TEST	Erector Spin	Lateral	Sitting	Right	Relaxed	21.2	521	0.92	10.1	0.65	15	Fabio Valenti	000560	2024	1	2	4	Morning
7.32278e+18	2024-01-11 11:22:53	3			1973-07-19	Female	157	50	20.3	Right	FIRST TEST	Erector Spin	Lateral	Sitting	Right	Relaxed	20.7	515	0.91	10.2	0.66	15	Fabio Valenti	000560	2024	1	2	4	Morning
7.32278e+18	2024-01-11 11:22:53	4			1973-07-19	Female	157	50	20.3	Right	FIRST TEST	Erector Spin	Lateral	Sitting	Right	Relaxed	20.9	520	0.89	10.1	0.65	15	Fabio Valenti	000560	2024	1	2	4	Morning
7.32278e+18	2024-01-11 11:22:54	5			1973-07-19	Female	157	50	20.3	Right	FIRST TEST	Erector Spin	Lateral	Sitting	Right	Relaxed	20.6	510	0.9	10.4	0.67	15	Fabio Valenti	000560	2024	1	2	4	Morning
7.32279e+18	2024-01-11 11:48:05	1			1973-07-19	Female	157	50	20.3	Right	SECOND TESTING 30 min	Erector Spin	Lateral	Lying	Left	Relaxed	16.1	337	1.38	16.1	1.01	15	Fabio Valenti	000560	2024	1	2	4	Morning
7.32279e+18	2024-01-11 11:48:06	2			1973-07-19	Female	157	50	20.3	Right	SECOND TESTING 30 min	Erector Spin	Lateral	Lying	Left	Relaxed	16.1	339	1.35	16.2	1.01	15	Fabio Valenti	000560	2024	1	2	4	Morning
7.32279e+18	2024-01-11 11:48:07	3			1973-07-19	Female	157	50	20.3	Right	SECOND TESTING 30 min	Erector Spin	Lateral	Lying	Left	Relaxed	16.3	348	1.33	15.6	0.98	15	Fabio Valenti	000560	2024	1	2	4	Morning
7.32279e+18	2024-01-11 11:48:08	4			1973-07-19	Female	157	50	20.3	Right	SECOND TESTING 30 min	Erector Spin	Lateral	Lying	Left	Relaxed	16.3	349	1.3	15.6	0.97	15	Fabio Valenti	000560	2024	1	2	4	Morning
7.32279e+18	2024-01-11 11:48:08	5			1973-07-19	Female	157	50	20.3	Right	SECOND TESTING 30 min	Erector Spin	Lateral	Lying	Left	Relaxed	16.1	341	1.34	16.1	1.01	15	Fabio Valenti	000560	2024	1	2	4	Morning
7.32279e+18	2024-01-11 11:48:23	1			1973-07-19	Female	157	50	20.3	Right	SECOND TESTING 30 min	Erector Spin	Lateral	Lying	Right	Relaxed	15.6	289	1.14	18.8	1.15	15	Fabio Valenti	000560	2024	1	2	4	Morning
7.32279e+18	2024-01-11 11:48:23	2			1973-07-19	Female	157	50	20.3	Right	SECOND TESTING 30 min	Erector Spin	Lateral	Lying	Right	Relaxed	15.5	294	1.11	18.6	1.15	15	Fabio Valenti	000560	2024	1	2	4	Morning
7.32279e+18	2024-01-11 11:48:24	3			1973-07-19	Female	157	50	20.3	Right	SECOND TESTING 30 min	Erector Spin	Lateral	Lying	Right	Relaxed	15.8	299	1.09	18.2	1.13	15	Fabio Valenti	000560	2024	1	2	4	Morning
7.32279e+18	2024-01-11 11:48:25	4			1973-07-19	Female	157	50	20.3	Right	SECOND TESTING 30 min	Erector Spin	Lateral	Lying	Right	Relaxed	15.9	303	1.1	17.8	1.1	15	Fabio Valenti	000560	2024	1	2	4	Morning
7.32279e+18	2024-01-11 11:48:25	5			1973-07-19	Female	157	50	20.3	Right	SECOND TESTING 30 min	Erector Spin	Lateral	Lying	Right	Relaxed	15.6	293	1.13	18.7	1.15	15	Fabio Valenti	000560	2024	1	2	4	Morning
7.32279e+18	2024-01-11 11:49:16	1			1973-07-19	Female	157	50	20.3	Right	SECOND TESTING 30 min	Erector Spin	Lateral	Sitting	Left	Relaxed	15.3	328	1.03	16	0.99	15	Fabio Valenti	000560	2024	1	2	4	Morning
7.32279e+18	2024-01-11 11:49:17	2			1973-07-19	Female	157	50	20.3	Right	SECOND TESTING 30 min	Erector Spin	Lateral	Sitting	Left	Relaxed	15.2	322	0.99	16.2	1	15	Fabio Valenti	000560	2024	1	2	4	Morning
7.32279e+18	2024-01-11 11:49:18	3			1973-07-19	Female	157	50	20.3	Right	SECOND TESTING 30 min	Erector Spin	Lateral	Sitting	Left	Relaxed	15.1	315	0.97	16.2	0.99	15	Fabio Valenti	000560	2024	1	2	4	Morning
7.32279e+18	2024-01-11 11:49:19	4			1973-07-19	Female	157	50	20.3	Right	SECOND TESTING 30 min	Erector Spin	Lateral	Sitting	Left	Relaxed	15.2	322	1.02	16.2	1	15	Fabio Valenti	000560	2024	1	2	4	Morning
7.32279e+18	2024-01-11 11:49:19	5			1973-07-19	Female	157	50	20.3	Right	SECOND TESTING 30 min	Erector Spin	Lateral	Sitting	Left	Relaxed	15.3	328	1.01	16	0.99	15	Fabio Valenti	000560	2024	1	2	4	Morning
7.32279e+18	2024-01-11 11:49:26	1			1973-07-19	Female	157	50	20.3	Right	SECOND TESTING 30 min	Erector Spin	Lateral	Sitting	Right	Relaxed	15.6	306	1.14	17.7	1.11	15	Fabio Valenti	000560	2024	1	2	4	Morning
7.32279e+18	2024-01-11 11:49:27	2			1973-07-19	Female	157	50	20.3	Right	SECOND TESTING 30 min	Erector Spin	Lateral	Sitting	Right	Relaxed	15.6	307	1.14	17.5	1.09	15	Fabio Valenti	000560	2024	1	2	4	Morning
7.32279e+18	2024-01-11 11:49:28	3			1973-07-19	Female	157	50	20.3	Right	SECOND TESTING 30 min	Erector Spin	Lateral	Sitting	Right	Relaxed	15.4	313	1.16	17.2	1.08	15	Fabio Valenti	000560	2024	1	2	4	Morning
7.32279e+18	2024-01-11 11:49:28	4			1973-07-19	Female	157	50	20.3	Right	SECOND TESTING 30 min	Erector Spin	Lateral	Sitting	Right	Relaxed	15.7	318	1.1	16.9	1.06	15	Fabio Valenti	000560	2024	1	2	4	Morning
7.32279e+18	2024-01-11 11:49:29	5			1973-07-19	Female	157	50	20.3	Right	SECOND TESTING 30 min	Erector Spin	Lateral	Sitting	Right	Relaxed	15.6	315	1.1	17.1	1.07	15	Fabio Valenti	000560	2024	1	2	4	Morning
7.32315e+18	2024-01-12 11:21:13	1			1973-07-19	Female	157	50	20.3	Right	THIRD TEST 24h	Erector Spin	Lateral	Lying	Left	Relaxed	16.3	325	1.16	16.4	1.01	15	Fabio Valenti	000560	2024	1	2	5	Morning
7.32315e+18	2024-01-12 11:21:13	2			1973-07-19	Female	157	50	20.3	Right	THIRD TEST 24h	Erector Spin	Lateral	Lying	Left	Relaxed	16.1	320	1.16	16.5	1.02	15	Fabio Valenti	000560	2024	1	2	5	Morning
7.32315e+18	2024-01-12 11:21:14	3			1973-07-19	Female	157	50	20.3	Right	THIRD TEST 24h	Erector Spin	Lateral	Lying	Left	Relaxed	15.8	315	1.13	16.8	1.04	15	Fabio Valenti	000560	2024	1	2	5	Morning
7.32315e+18	2024-01-12 11:21:15	4			1973-07-19	Female	157	50	20.3	Right	THIRD TEST 24h	Erector Spin	Lateral	Lying	Left	Relaxed	15.8	316	1.14	16.7	1.03	15	Fabio Valenti	000560	2024	1	2	5	Morning
7.32315e+18	2024-01-12 11:21:15	5			1973-07-19	Female	157	50	20.3	Right	THIRD TEST 24h	Erector Spin	Lateral	Lying	Left	Relaxed	15.7	312	1.1	16.9	1.04	15	Fabio Valenti	000560	2024	1	2	5	Morning
7.32316e+18	2024-01-12 11:21:33	1			1973-07-19	Female	157	50	20.3	Right	THIRD TEST 24h	Erector Spin	Lateral	Lying	Right	Relaxed	16.8	387	1.8	14.2	0.9	15	Fabio Valenti	000560	2024	1	2	5	Morning
7.32316e+18	2024-01-12 11:21:34	2			1973-07-19	Female	157	50	20.3	Right	THIRD TEST 24h	Erector Spin	Lateral	Lying	Right	Relaxed	16.9	389	1.77	14	0.91	15	Fabio Valenti	000560	2024	1	2	5	Morning
7.32316e+18	2024-01-12 11:21:34	3			1973-07-19	Female	157	50	20.3	Right	THIRD TEST 24h	Erector Spin	Lateral	Lying	Right	Relaxed	16.9	393	1.76	14.2	0.92	15	Fabio Valenti	000560	2024	1	2	5	Morning
7.32316e+18	2024-01-12 11:21:36	4			1973-07-19	Female	157	50	20.3	Right	THIRD TEST 24h	Erector Spin	Lateral	Lying	Right	Relaxed	16.8	396	1.76	14.1	0.9	15	Fabio Valenti	000560	2024	1	2	5	Morning
7.32316e+18	2024-01-12 11:21:37	5			1973-07-19	Female	157	50	20.3	Right	THIRD TEST 24h	Erector Spin	Lateral	Lying	Right	Relaxed	16.8	394	1.78	14.2	0.9	15	Fabio Valenti	000560	2024	1	2	5	Morning
7.32316e+18	2024-01-12 11:22:07	1			1973-07-19	Female	157	50	20.3	Right	THIRD TEST 24h	Erector Spin	Lateral	Sitting	Left	Relaxed	20.1	556	1.22	9.5	0.61	15	Fabio Valenti	000560	2024	1	2	5	Morning
7.32316e+18	2024-01-12 11:22:08	2			1973-07-19	Female	157	50	20.3	Right	THIRD TEST 24h	Erector Spin	Lateral	Sitting	Left	Relaxed	20.6	575	1.21	9.3	0.6	15	Fabio Valenti	000560	2024	1	2	5	Morning
7.32316e+18	2024-01-12 11:22:09	3			1973-07-19	Female	157	50	20.3	Right	THIRD TEST 24h	Erector Spin	Lateral	Sitting	Left	Relaxed	20.6	579	1.22	9.2	0.6	15	Fabio Valenti	000560	2024	1	2	5	Morning
7.32316e+18	2024-01-12 11:22:09	4			1973-07-19	Female	157	50	20.3	Right	THIRD TEST 24h	Erector Spin	Lateral	Sitting	Left	Relaxed	20.3	569	1.2	9.3	0.6	15	Fabio Valenti	000560	2024	1	2	5	Morning
7.32316e+18	2024-01-12 11:22:10	5			1973-07-19	Female	157	50	20.3	Right	THIRD TEST 24h	Erector Spin	Lateral	Sitting	Left	Relaxed	20.2	568	1.24	9.4	0.61	15	Fabio Valenti	000560	2024	1	2	5	Morning
7.32316e+18	2024-01-12 11:22:17	1			1973-07-19	Female	157	50	20.3	Right	THIRD TEST 24h	Erector Spin	Lateral	Sitting	Right	Relaxed	17.9	384	1	14	0.88	15	Fabio Valenti	000560	2024	1	2	5	Morning
7.32316e+18	2024-01-12 11:22:17	2			1973-07-19	Female	157	50	20.3	Right	THIRD TEST 24h	Erector Spin	Lateral	Sitting	Right	Relaxed	17.4	376	0.98	14	0.87	15	Fabio Valenti	000560	2024	1	2	5	Morning
7.32316e+18	2024-01-12 11:22:18	3			1973-07-19	Female	157	50	20.3	Right	THIRD TEST 24h	Erector Spin	Lateral	Sitting	Right	Relaxed	17.4	378	0.99	14.3	0.9	15	Fabio Valenti	000560	2024	1	2	5	Morning
7.32316e+18	2024-01-12 11:22:19	4			1973-07-19	Female	157	50	20.3	Right	THIRD TEST 24h	Erector Spin	Lateral	Sitting	Right	Relaxed	17.6	380	1.02	14.3	0.9	15	Fabio Valenti	000560	2024	1	2	5	Morning
7.32316e+18	2024-01-12 11:22:19	5			1973-07-19	Female	157	50	20.3	Right	THIRD TEST 24h	Erector Spin	Lateral	Sitting	Right	Relaxed	17.3	377	0.99	14.3	0.9	15	Fabio Valenti	000560	2024	1	2	5	Morning
7.32984e+18	2024-01-30 11:31:53	1			1979-08-08	Male	185	90	26.3	Right	FIRST TEST	Erector Spin	Lateral	Lying	Left	Relaxed	14.9	254	0.79	18.8	1.11	15	Fabio Valenti	000560	2024	1	5	2	Morning
7.32984e+18	2024-01-30 11:31:54	2			1979-08-08	Male	185	90	26.3	Right	FIRST TEST	Erector Spin	Lateral	Lying	Left	Relaxed	15.1	258	0.77	18.2	1.07	15	Fabio Valenti	000560	2024	1	5	2	Morning
7.32984e+18	2024-01-30 11:31:54	3			1979-08-08	Male	185	90	26.3	Right	FIRST TEST	Erector Spin	Lateral	Lying	Left	Relaxed	15.3	261	0.76	18	1.06	15	Fabio Valenti	000560	2024	1	5	2	Morning
7.32984e+18	2024-01-30 11:31:55	4			1979-08-08	Male	185	90	26.3	Right	FIRST TEST	Erector Spin	Lateral	Lying	Left	Relaxed	15.4	263	0.75	17.9	1.05	15	Fabio Valenti	000560	2024	1	5	2	Morning
7.32984e+18	2024-01-30 11:31:56	5			1979-08-08	Male	185	90	26.3	Right	FIRST TEST	Erector Spin	Lateral	Lying	Left	Relaxed	15.6	265	0.75	17.7	1.04	15	Fabio Valenti	000560	2024	1	5	2	Morning
7.32984e+18	2024-01-30 11:32:07	1			1979-08-08	Male	185	90	26.3	Right	FIRST TEST	Erector Spin	Lateral	Lying	Right	Relaxed	15.6	289	0.84	16.6	0.98	15	Fabio Valenti	000560	2024	1	5	2	Morning
7.32984e+18	2024-01-30 11:32:08	2			1979-08-08	Male	185	90	26.3	Right	FIRST TEST	Erector Spin	Lateral	Lying	Right	Relaxed	15.5	290	0.82	16.6	0.98	15	Fabio Valenti	000560	2024	1	5	2	Morning
7.32984e+18	2024-01-30 11:32:09	3			1979-08-08	Male	185	90	26.3	Right	FIRST TEST	Erector Spin	Lateral	Lying	Right	Relaxed	15.6	291	0.81	16.4	0.96	15	Fabio Valenti	000560	2024	1	5	2	Morning
7.32984e+18	2024-01-30 11:32:09	4			1979-08-08	Male	185	90	26.3	Right	FIRST TEST	Erector Spin	Lateral	Lying	Right	Relaxed	15.6	291	0.83	16.5	0.97	15	Fabio Valenti	000560	2024	1	5	2	Morning
7.32984e+18	2024-01-30 11:32:10	5			1979-08-08	Male	185	90	26.3	Right	FIRST TEST	Erector Spin	Lateral	Lying	Right	Relaxed	15.6	293	0.81	16.3	0.96	15	Fabio Valenti	000560	2024	1	5	2	Morning
7.32984e+18	2024-01-30 11:32:49	1			1979-08-08	Male	185	90	26.3	Right	FIRST TEST	Erector Spin	Lateral	Sitting	Left	Relaxed	14.9	264	0.9	18.8	1.13	15	Fabio Valenti	000560	2024	1	5	2	Morning
7.32984e+18	2024-01-30 11:32:50	2			1979-08-08	Male	185	90	26.3	Right	FIRST TEST	Erector Spin	Lateral	Sitting	Left	Relaxed	14.8	270	0.9	18.9	1.14	15	Fabio Valenti	000560	2024	1	5	2	Morning
7.32984e+18	2024-01-30 11:32:50	3			1979-08-08	Male	185	90	26.3	Right	FIRST TEST	Erector Spin	Lateral	Sitting	Left	Relaxed	14.9	265	0.88	19.1	1.15	15	Fabio Valenti	000560	2024	1	5	2	Morning
7.32984e+18	2024-01-30 11:32:51	4			1979-08-08	Male	185	90	26.3	Right	FIRST TEST	Erector Spin	Lateral	Sitting	Left	Relaxed	15	272	0.88	18.9	1.14	15	Fabio Valenti	000560	2024	1	5	2	Morning
7.32984e+18	2024-01-30 11:32:52	5			1979-08-08	Male	185	90	26.3	Right	FIRST TEST	Erector Spin	Lateral	Sitting	Left	Relaxed	15.1	265	0.87	18.7	1.12	15	Fabio Valenti	000560	2024	1	5	2	Morning
7.32984e+18	2024-01-30 11:33:03	1			1979-08-08	Male	185	90	26.3	Right	FIRST TEST	Erector Spin	Lateral	Sitting	Right	Relaxed	15.3	316	0.95	16.3	0.99	15	Fabio Valenti	000560	2024	1	5	2	Morning
7.32984e+18	2024-01-30 11:33:03	2			1979-08-08	Male	185	90	26.3	Right	FIRST TEST	Erector Spin	Lateral	Sitting	Right	Relaxed	15.3	320	0.92	16.2	0.99	15	Fabio Valenti	000560	2024	1	5	2	Morning
7.32984e+18	2024-01-30 11:33:04	3			1979-08-08	Male	185	90	26.3	Right	FIRST TEST	Erector Spin	Lateral	Sitting	Right	Relaxed	15.3	325	0.92	16.3	1	15	Fabio Valenti	000560	2024	1	5	2	Morning
7.32984e+18	2024-01-30 11:33:05	4			1979-08-08	Male	185	90	26.3	Right	FIRST TEST	Erector Spin	Lateral	Sitting	Right	Relaxed	15.3	326	0.92	16.3	1	15	Fabio Valenti	000560	2024	1	5	2	Morning
7.32984e+18	2024-01-30 11:33:05	5			1979-08-08	Male	185	90	26.3	Right	FIRST TEST	Erector Spin	Lateral	Sitting	Right	Relaxed	15.2	327	0.9	16.3	1	15	Fabio Valenti	000560	2024	1	5	2	Morning
7.32984e+18	2024-01-30 11:59:48	1			1979-08-08	Male	185	90	26.3	Right	SECOND TESTING 30 min	Erector Spin	Lateral	Lying	Left	Relaxed	15	267	0.95	18.7	1.11	15	Fabio Valenti	000560	2024	1	5	2	Morning
7.32984e+18	2024-01-30 11:59:49	2			1979-08-08	Male	185	90	26.3	Right	SECOND TESTING 30 min	Erector Spin	Lateral	Lying	Left	Relaxed	15	266	0.94	18.6	1.1	15	Fabio Valenti	000560	2024	1	5	2	Morning
7.32984e+18	2024-01-30 11:59:49	3			1979-08-08	Male	185	90	26.3	Right	SECOND TESTING 30 min	Erector Spin	Lateral	Lying	Left	Relaxed	15.2	267	0.93	18.6	1.1	15	Fabio Valenti	000560	2024	1	5	2	Morning
7.32984e+18	2024-01-30 11:59:50	4			1979-08-08	Male	185	90	26.3	Right	SECOND TESTING 30 min	Erector Spin	Lateral	Lying	Left	Relaxed	15.3	268	0.91	18.5	1.1	15	Fabio Valenti	000560	2024	1	5	2	Morning
7.32984e+18	2024-01-30 11:59:51	5			1979-08-08	Male	185	90	26.3	Right	SECOND TESTING 30 min	Erector Spin	Lateral	Lying	Left	Relaxed	15.3	269	0.9	18.5	1.1	15	Fabio Valenti	000560	2024	1	5	2	Morning
7.32984e+18	2024-01-30 12:00:15	1			1979-08-08	Male	185	90	26.3	Right	SECOND TESTING 30 min	Erector Spin	Lateral	Lying	Right	Relaxed	15.3	288	0.87	17	1	15	Fabio Valenti	000560	2024	1	5	2	Day
7.32984e+18	2024-01-30 12:00:15	2			1979-08-08	Male	185	90	26.3	Right	SECOND TESTING 30 min	Erector Spin	Lateral	Lying	Right	Relaxed	15.3	287	0.87	17.2	1.02	15	Fabio Valenti	000560	2024	1	5	2	Day
7.32984e+18	2024-01-30 12:00:16	3			1979-08-08	Male	185	90	26.3	Right	SECOND TESTING 30 min	Erector Spin	Lateral	Lying	Right	Relaxed	15.3	287	0.86	17.2	1.02	15	Fabio Valenti	000560	2024	1	5	2	Day
7.32984e+18	2024-01-30 12:00:17	4			1979-08-08	Male	185	90	26.3	Right	SECOND TESTING 30 min	Erector Spin	Lateral	Lying	Right	Relaxed	15.4	288	0.86	17.1	1.01	15	Fabio Valenti	000560	2024	1	5	2	Day
7.32984e+18	2024-01-30 12:00:18	5			1979-08-08	Male	185	90	26.3	Right	SECOND TESTING 30 min	Erector Spin	Lateral	Lying	Right	Relaxed	15.5	291	0.85	17	1	15	Fabio Valenti	000560	2024	1	5	2	Day
7.32984e+18	2024-01-30 12:00:52	1			1979-08-08	Male	185	90	26.3	Right	SECOND TESTING 30 min	Erector Spin	Lateral	Sitting	Left	Relaxed	16.2	319	0.9	16.7	1.02	15	Fabio Valenti	000560	2024	1	5	2	Day
7.32984e+18	2024-01-30 12:00:53	2			1979-08-08	Male	185	90	26.3	Right	SECOND TESTING 30 min	Erector Spin	Lateral	Sitting	Left	Relaxed	16.4	319	0.92	16.7	1.02	15	Fabio Valenti	000560	2024	1	5	2	Day
7.32984e+18	2024-01-30 12:00:54	3			1979-08-08	Male	185	90	26.3	Right	SECOND TESTING 30 min	Erector Spin	Lateral	Sitting	Left	Relaxed	16.3	321	0.9	16.6	1.01	15	Fabio Valenti	000560	2024	1	5	2	Day
7.32984e+18	2024-01-30 12:00:55	4			1979-08-08	Male	185	90	26.3	Right	SECOND TESTING 30 min	Erector Spin	Lateral	Sitting	Left	Relaxed	16.2	315	0.9	16.7	1.02	15	Fabio Valenti	000560	2024	1	5	2	Day
7.32984e+18	2024-01-30 12:00:55	5			1979-08-08	Male	185	90	26.3	Right	SECOND TESTING 30 min	Erector Spin	Lateral	Sitting	Left	Relaxed	16.3	321	0.9	16.7	1.02	15	Fabio Valenti	000560	2024	1	5	2	Day
7.32984e+18	2024-01-30 12:01:05	1			1979-08-08	Male	185	90	26.3	Right	SECOND TESTING 30 min	Erector Spin	Lateral	Sitting	Right	Relaxed	14.7	331	1.04	15.9	0.95	15	Fabio Valenti	000560	2024	1	5	2	Day
7.32984e+18	2024-01-30 12:01:06	2			1979-08-08	Male	185	90	26.3	Right	SECOND TESTING 30 min	Erector Spin	Lateral	Sitting	Right	Relaxed	14.9	337	0.99	15.3	0.9	15	Fabio Valenti	000560	2024	1	5	2	Day
7.32984e+18	2024-01-30 12:01:07	3			1979-08-08	Male	185	90	26.3	Right	SECOND TESTING 30 min	Erector Spin	Lateral	Sitting	Right	Relaxed	15.1	340	0.99	15.4	0.92	15	Fabio Valenti	000560	2024	1	5	2	Day
7.32984e+18	2024-01-30 12:01:07	4			1979-08-08	Male	185	90	26.3	Right	SECOND TESTING 30 min	Erector Spin	Lateral	Sitting	Right	Relaxed	14.7	338	0.97	15.6	0.93	15	Fabio Valenti	000560	2024	1	5	2	Day
7.32984e+18	2024-01-30 12:01:08	5			1979-08-08	Male	185	90	26.3	Right	SECOND TESTING 30 min	Erector Spin	Lateral	Sitting	Right	Relaxed	14.9	333	0.98	15.6	0.93	15	Fabio Valenti	000560	2024	1	5	2	Day
7.33021e+18	2024-01-31 11:31:13	1			1979-08-08	Male	185	90	26.3	Right	THIRD TEST 24h	Erector Spin	Lateral	Lying	Left	Relaxed	15.3	288	0.99	18	1.08	15	Fabio Valenti	000560	2024	1	5	3	Morning
7.33021e+18	2024-01-31 11:31:13	2			1979-08-08	Male	185	90	26.3	Right	THIRD TEST 24h	Erector Spin	Lateral	Lying	Left	Relaxed	15.3	292	0.99	17.8	1.07	15	Fabio Valenti	000560	2024	1	5	3	Morning
7.33021e+18	2024-01-31 11:31:15	3			1979-08-08	Male	185	90	26.3	Right	THIRD TEST 24h	Erector Spin	Lateral	Lying	Left	Relaxed	15.3	294	0.97	17.7	1.06	15	Fabio Valenti	000560	2024	1	5	3	Morning
7.33021e+18	2024-01-31 11:31:16	4			1979-08-08	Male	185	90	26.3	Right	THIRD TEST 24h	Erector Spin	Lateral	Lying	Left	Relaxed	15.4	294	0.94	17.7	1.06	15	Fabio Valenti	000560	2024	1	5	3	Morning
7.33021e+18	2024-01-31 11:31:17	5			1979-08-08	Male	185	90	26.3	Right	THIRD TEST 24h	Erector Spin	Lateral	Lying	Left	Relaxed	15.4	296	0.95	17.7	1.06	15	Fabio Valenti	000560	2024	1	5	3	Morning
7.33021e+18	2024-01-31 11:31:35	1			1979-08-08	Male	185	90	26.3	Right	THIRD TEST 24h	Erector Spin	Lateral	Lying	Right	Relaxed	15.3	286	0.94	17.1	1	15	Fabio Valenti	000560	2024	1	5	3	Morning
7.33021e+18	2024-01-31 11:31:36	2			1979-08-08	Male	185	90	26.3	Right	THIRD TEST 24h	Erector Spin	Lateral	Lying	Right	Relaxed	15.3	285	0.92	17.3	1.01	15	Fabio Valenti	000560	2024	1	5	3	Morning
7.33021e+18	2024-01-31 11:31:37	3			1979-08-08	Male	185	90	26.3	Right	THIRD TEST 24h	Erector Spin	Lateral	Lying	Right	Relaxed	15.3	286	0.91	17.3	1.02	15	Fabio Valenti	000560	2024	1	5	3	Morning
7.33021e+18	2024-01-31 11:31:37	4			1979-08-08	Male	185	90	26.3	Right	THIRD TEST 24h	Erector Spin	Lateral	Lying	Right	Relaxed	15.3	285	0.9	17.3	1.01	15	Fabio Valenti	000560	2024	1	5	3	Morning
7.33021e+18	2024-01-31 11:31:38	5			1979-08-08	Male	185	90	26.3	Right	THIRD TEST 24h	Erector Spin	Lateral	Lying	Right	Relaxed	15.3	284	0.89	17.4	1.02	15	Fabio Valenti	000560	2024	1	5	3	Morning
7.33021e+18	2024-01-31 11:32:16	1			1979-08-08	Male	185	90	26.3	Right	THIRD TEST 24h	Erector Spin	Lateral	Sitting	Left	Relaxed	15.8	304	0.94	17	1.03	15	Fabio Valenti	000560	2024	1	5	3	Morning
7.33021e+18	2024-01-31 11:32:17	2			1979-08-08	Male	185	90	26.3	Right	THIRD TEST 24h	Erector Spin	Lateral	Sitting	Left	Relaxed	16	311	0.93	16.6	1.01	15	Fabio Valenti	000560	2024	1	5	3	Morning
7.33021e+18	2024-01-31 11:32:18	3			1979-08-08	Male	185	90	26.3	Right	THIRD TEST 24h	Erector Spin	Lateral	Sitting	Left	Relaxed	16	317	0.94	16.2	0.98	15	Fabio Valenti	000560	2024	1	5	3	Morning
7.33021e+18	2024-01-31 11:32:19	4			1979-08-08	Male	185	90	26.3	Right	THIRD TEST 24h	Erector Spin	Lateral	Sitting	Left	Relaxed	15.8	315	0.94	16.5	1	15	Fabio Valenti	000560	2024	1	5	3	Morning
7.33021e+18	2024-01-31 11:32:19	5			1979-08-08	Male	185	90	26.3	Right	THIRD TEST 24h	Erector Spin	Lateral	Sitting	Left	Relaxed	15.7	311	0.96	16.8	1.02	15	Fabio Valenti	000560	2024	1	5	3	Morning
7.33021e+18	2024-01-31 11:32:27	1			1979-08-08	Male	185	90	26.3	Right	THIRD TEST 24h	Erector Spin	Lateral	Sitting	Right	Relaxed	15.6	347	0.94	14.8	0.89	15	Fabio Valenti	000560	2024	1	5	3	Morning
7.33021e+18	2024-01-31 11:32:28	2			1979-08-08	Male	185	90	26.3	Right	THIRD TEST 24h	Erector Spin	Lateral	Sitting	Right	Relaxed	15.7	359	1	14.8	0.89	15	Fabio Valenti	000560	2024	1	5	3	Morning
7.33021e+18	2024-01-31 11:32:28	3			1979-08-08	Male	185	90	26.3	Right	THIRD TEST 24h	Erector Spin	Lateral	Sitting	Right	Relaxed	15.8	360	1.01	14.8	0.89	15	Fabio Valenti	000560	2024	1	5	3	Morning
7.33021e+18	2024-01-31 11:32:29	4			1979-08-08	Male	185	90	26.3	Right	THIRD TEST 24h	Erector Spin	Lateral	Sitting	Right	Relaxed	15.9	359	1	14.8	0.89	15	Fabio Valenti	000560	2024	1	5	3	Morning
7.33021e+18	2024-01-31 11:32:30	5			1979-08-08	Male	185	90	26.3	Right	THIRD TEST 24h	Erector Spin	Lateral	Sitting	Right	Relaxed	16	359	0.99	14.7	0.88	15	Fabio Valenti	000560	2024	1	5	3	Morning
7.32501e+18	2024-01-17 11:14:45	1			1972-01-17	Male	178	94	29.7	Right	FIRST TEST	Erector Spin	Lateral	Lying	Left	Relaxed	13.5	247	1.44	25.3	1.56	15	Fabio Valenti	000560	2024	1	3	3	Morning
7.32501e+18	2024-01-17 11:14:46	2			1972-01-17	Male	178	94	29.7	Right	FIRST TEST	Erector Spin	Lateral	Lying	Left	Relaxed	13.4	248	1.45	25.3	1.57	15	Fabio Valenti	000560	2024	1	3	3	Morning
7.32501e+18	2024-01-17 11:14:46	3			1972-01-17	Male	178	94	29.7	Right	FIRST TEST	Erector Spin	Lateral	Lying	Left	Relaxed	13.4	247	1.42	25.3	1.56	15	Fabio Valenti	000560	2024	1	3	3	Morning
7.32501e+18	2024-01-17 11:14:47	4			1972-01-17	Male	178	94	29.7	Right	FIRST TEST	Erector Spin	Lateral	Lying	Left	Relaxed	13.5	248	1.42	25.1	1.55	15	Fabio Valenti	000560	2024	1	3	3	Morning
7.32501e+18	2024-01-17 11:14:49	5			1972-01-17	Male	178	94	29.7	Right	FIRST TEST	Erector Spin	Lateral	Lying	Left	Relaxed	13.4	247	1.45	25.1	1.55	15	Fabio Valenti	000560	2024	1	3	3	Morning
7.32501e+18	2024-01-17 11:14:57	1			1972-01-17	Male	178	94	29.7	Right	FIRST TEST	Erector Spin	Lateral	Lying	Right	Relaxed	13.1	239	1.34	26.2	1.62	15	Fabio Valenti	000560	2024	1	3	3	Morning
7.32501e+18	2024-01-17 11:14:57	2			1972-01-17	Male	178	94	29.7	Right	FIRST TEST	Erector Spin	Lateral	Lying	Right	Relaxed	13	238	1.29	26.3	1.62	15	Fabio Valenti	000560	2024	1	3	3	Morning
7.32501e+18	2024-01-17 11:14:58	3			1972-01-17	Male	178	94	29.7	Right	FIRST TEST	Erector Spin	Lateral	Lying	Right	Relaxed	13	236	1.29	26.3	1.62	15	Fabio Valenti	000560	2024	1	3	3	Morning
7.32501e+18	2024-01-17 11:14:59	4			1972-01-17	Male	178	94	29.7	Right	FIRST TEST	Erector Spin	Lateral	Lying	Right	Relaxed	13	235	1.3	26.5	1.64	15	Fabio Valenti	000560	2024	1	3	3	Morning
7.32501e+18	2024-01-17 11:15:00	5			1972-01-17	Male	178	94	29.7	Right	FIRST TEST	Erector Spin	Lateral	Lying	Right	Relaxed	13.2	239	1.26	26.3	1.62	15	Fabio Valenti	000560	2024	1	3	3	Morning
7.32501e+18	2024-01-17 11:15:22	1			1972-01-17	Male	178	94	29.7	Right	FIRST TEST	Erector Spin	Lateral	Sitting	Left	Relaxed	18.3	406	1.07	13	0.81	15	Fabio Valenti	000560	2024	1	3	3	Morning
7.32501e+18	2024-01-17 11:15:23	2			1972-01-17	Male	178	94	29.7	Right	FIRST TEST	Erector Spin	Lateral	Sitting	Left	Relaxed	18	409	1.06	13.3	0.84	15	Fabio Valenti	000560	2024	1	3	3	Morning
7.32501e+18	2024-01-17 11:15:24	3			1972-01-17	Male	178	94	29.7	Right	FIRST TEST	Erector Spin	Lateral	Sitting	Left	Relaxed	17.9	409	1.04	13.2	0.83	15	Fabio Valenti	000560	2024	1	3	3	Morning
7.32501e+18	2024-01-17 11:15:25	4			1972-01-17	Male	178	94	29.7	Right	FIRST TEST	Erector Spin	Lateral	Sitting	Left	Relaxed	18	411	1.03	13.2	0.83	15	Fabio Valenti	000560	2024	1	3	3	Morning
7.32501e+18	2024-01-17 11:15:25	5			1972-01-17	Male	178	94	29.7	Right	FIRST TEST	Erector Spin	Lateral	Sitting	Left	Relaxed	18	412	1.04	13.2	0.83	15	Fabio Valenti	000560	2024	1	3	3	Morning
7.32501e+18	2024-01-17 11:15:33	1			1972-01-17	Male	178	94	29.7	Right	FIRST TEST	Erector Spin	Lateral	Sitting	Right	Relaxed	18.9	435	1.09	12	0.75	15	Fabio Valenti	000560	2024	1	3	3	Morning
7.32501e+18	2024-01-17 11:15:34	2			1972-01-17	Male	178	94	29.7	Right	FIRST TEST	Erector Spin	Lateral	Sitting	Right	Relaxed	18.5	440	1.06	12	0.75	15	Fabio Valenti	000560	2024	1	3	3	Morning
7.32501e+18	2024-01-17 11:15:35	3			1972-01-17	Male	178	94	29.7	Right	FIRST TEST	Erector Spin	Lateral	Sitting	Right	Relaxed	18.5	446	1.07	11.8	0.74	15	Fabio Valenti	000560	2024	1	3	3	Morning
7.32501e+18	2024-01-17 11:15:35	4			1972-01-17	Male	178	94	29.7	Right	FIRST TEST	Erector Spin	Lateral	Sitting	Right	Relaxed	18.7	450	1.05	11.8	0.74	15	Fabio Valenti	000560	2024	1	3	3	Morning
7.32501e+18	2024-01-17 11:15:36	5			1972-01-17	Male	178	94	29.7	Right	FIRST TEST	Erector Spin	Lateral	Sitting	Right	Relaxed	18.5	439	1.04	11.8	0.73	15	Fabio Valenti	000560	2024	1	3	3	Morning
7.32502e+18	2024-01-17 11:48:50	1			1972-01-17	Male	178	94	29.7	Right	SECOND TESTING 30 min	Erector Spin	Lateral	Lying	Left	Relaxed	13.2	239	1.43	25.9	1.6	15	Fabio Valenti	000560	2024	1	3	3	Morning
7.32502e+18	2024-01-17 11:48:51	2			1972-01-17	Male	178	94	29.7	Right	SECOND TESTING 30 min	Erector Spin	Lateral	Lying	Left	Relaxed	13.1	243	1.41	25.7	1.58	15	Fabio Valenti	000560	2024	1	3	3	Morning
7.32502e+18	2024-01-17 11:48:51	3			1972-01-17	Male	178	94	29.7	Right	SECOND TESTING 30 min	Erector Spin	Lateral	Lying	Left	Relaxed	13.2	240	1.39	25.9	1.6	15	Fabio Valenti	000560	2024	1	3	3	Morning
7.32502e+18	2024-01-17 11:48:52	4			1972-01-17	Male	178	94	29.7	Right	SECOND TESTING 30 min	Erector Spin	Lateral	Lying	Left	Relaxed	13.2	242	1.41	25.8	1.6	15	Fabio Valenti	000560	2024	1	3	3	Morning
7.32502e+18	2024-01-17 11:48:53	5			1972-01-17	Male	178	94	29.7	Right	SECOND TESTING 30 min	Erector Spin	Lateral	Lying	Left	Relaxed	13.1	242	1.41	25.7	1.6	15	Fabio Valenti	000560	2024	1	3	3	Morning
7.32502e+18	2024-01-17 11:49:01	1			1972-01-17	Male	178	94	29.7	Right	SECOND TESTING 30 min	Erector Spin	Lateral	Lying	Right	Relaxed	12.8	242	1.46	25.7	1.58	15	Fabio Valenti	000560	2024	1	3	3	Morning
7.32502e+18	2024-01-17 11:49:01	2			1972-01-17	Male	178	94	29.7	Right	SECOND TESTING 30 min	Erector Spin	Lateral	Lying	Right	Relaxed	12.9	245	1.44	25.4	1.57	15	Fabio Valenti	000560	2024	1	3	3	Morning
7.32502e+18	2024-01-17 11:49:02	3			1972-01-17	Male	178	94	29.7	Right	SECOND TESTING 30 min	Erector Spin	Lateral	Lying	Right	Relaxed	12.9	246	1.42	25.3	1.56	15	Fabio Valenti	000560	2024	1	3	3	Morning
7.32502e+18	2024-01-17 11:49:03	4			1972-01-17	Male	178	94	29.7	Right	SECOND TESTING 30 min	Erector Spin	Lateral	Lying	Right	Relaxed	12.9	245	1.39	25.3	1.56	15	Fabio Valenti	000560	2024	1	3	3	Morning
7.32502e+18	2024-01-17 11:49:04	5			1972-01-17	Male	178	94	29.7	Right	SECOND TESTING 30 min	Erector Spin	Lateral	Lying	Right	Relaxed	12.9	245	1.39	25.3	1.56	15	Fabio Valenti	000560	2024	1	3	3	Morning
7.32502e+18	2024-01-17 11:49:45	1			1972-01-17	Male	178	94	29.7	Right	SECOND TESTING 30 min	Erector Spin	Lateral	Sitting	Left	Relaxed	19.4	442	1.11	12.2	0.77	15	Fabio Valenti	000560	2024	1	3	3	Morning
7.32502e+18	2024-01-17 11:49:45	2			1972-01-17	Male	178	94	29.7	Right	SECOND TESTING 30 min	Erector Spin	Lateral	Sitting	Left	Relaxed	19.3	441	1.12	12.3	0.78	15	Fabio Valenti	000560	2024	1	3	3	Morning
7.32502e+18	2024-01-17 11:49:46	3			1972-01-17	Male	178	94	29.7	Right	SECOND TESTING 30 min	Erector Spin	Lateral	Sitting	Left	Relaxed	19.4	441	1.09	12.5	0.79	15	Fabio Valenti	000560	2024	1	3	3	Morning
7.32502e+18	2024-01-17 11:49:47	4			1972-01-17	Male	178	94	29.7	Right	SECOND TESTING 30 min	Erector Spin	Lateral	Sitting	Left	Relaxed	19.5	445	1.09	12.3	0.78	15	Fabio Valenti	000560	2024	1	3	3	Morning
7.32502e+18	2024-01-17 11:49:48	5			1972-01-17	Male	178	94	29.7	Right	SECOND TESTING 30 min	Erector Spin	Lateral	Sitting	Left	Relaxed	19.7	445	1.1	12.2	0.77	15	Fabio Valenti	000560	2024	1	3	3	Morning
7.32502e+18	2024-01-17 11:49:56	1			1972-01-17	Male	178	94	29.7	Right	SECOND TESTING 30 min	Erector Spin	Lateral	Sitting	Right	Relaxed	20.1	451	1.14	11.8	0.74	15	Fabio Valenti	000560	2024	1	3	3	Morning
7.32502e+18	2024-01-17 11:49:57	2			1972-01-17	Male	178	94	29.7	Right	SECOND TESTING 30 min	Erector Spin	Lateral	Sitting	Right	Relaxed	20	453	1.11	11.8	0.74	15	Fabio Valenti	000560	2024	1	3	3	Morning
7.32502e+18	2024-01-17 11:49:58	3			1972-01-17	Male	178	94	29.7	Right	SECOND TESTING 30 min	Erector Spin	Lateral	Sitting	Right	Relaxed	20	452	1.11	11.8	0.74	15	Fabio Valenti	000560	2024	1	3	3	Morning
7.32502e+18	2024-01-17 11:49:58	4			1972-01-17	Male	178	94	29.7	Right	SECOND TESTING 30 min	Erector Spin	Lateral	Sitting	Right	Relaxed	19.8	445	1.1	11.9	0.75	15	Fabio Valenti	000560	2024	1	3	3	Morning
7.32502e+18	2024-01-17 11:49:59	5			1972-01-17	Male	178	94	29.7	Right	SECOND TESTING 30 min	Erector Spin	Lateral	Sitting	Right	Relaxed	19.8	444	1.09	11.9	0.75	15	Fabio Valenti	000560	2024	1	3	3	Morning
7.32538e+18	2024-01-18 11:16:42	1			1972-01-17	Male	178	94	29.7	Right	THIRD TEST 24h	Erector Spin	Lateral	Lying	Left	Relaxed	13.1	239	1.48	25.9	1.61	15	Fabio Valenti	000560	2024	1	3	4	Morning
7.32538e+18	2024-01-18 11:16:43	2			1972-01-17	Male	178	94	29.7	Right	THIRD TEST 24h	Erector Spin	Lateral	Lying	Left	Relaxed	12.8	240	1.46	25.9	1.61	15	Fabio Valenti	000560	2024	1	3	4	Morning
7.32538e+18	2024-01-18 11:16:44	3			1972-01-17	Male	178	94	29.7	Right	THIRD TEST 24h	Erector Spin	Lateral	Lying	Left	Relaxed	12.8	240	1.46	25.9	1.61	15	Fabio Valenti	000560	2024	1	3	4	Morning
7.32538e+18	2024-01-18 11:16:44	4			1972-01-17	Male	178	94	29.7	Right	THIRD TEST 24h	Erector Spin	Lateral	Lying	Left	Relaxed	13.1	243	1.46	25.2	1.57	15	Fabio Valenti	000560	2024	1	3	4	Morning
7.32538e+18	2024-01-18 11:16:45	5			1972-01-17	Male	178	94	29.7	Right	THIRD TEST 24h	Erector Spin	Lateral	Lying	Left	Relaxed	13.1	247	1.47	25	1.56	15	Fabio Valenti	000560	2024	1	3	4	Morning
7.32538e+18	2024-01-18 11:16:57	1			1972-01-17	Male	178	94	29.7	Right	THIRD TEST 24h	Erector Spin	Lateral	Lying	Right	Relaxed	12.7	233	1.47	26.1	1.62	15	Fabio Valenti	000560	2024	1	3	4	Morning
7.32538e+18	2024-01-18 11:16:58	2			1972-01-17	Male	178	94	29.7	Right	THIRD TEST 24h	Erector Spin	Lateral	Lying	Right	Relaxed	12.7	237	1.45	25.7	1.6	15	Fabio Valenti	000560	2024	1	3	4	Morning
7.32538e+18	2024-01-18 11:16:59	3			1972-01-17	Male	178	94	29.7	Right	THIRD TEST 24h	Erector Spin	Lateral	Lying	Right	Relaxed	12.7	235	1.42	25.8	1.61	15	Fabio Valenti	000560	2024	1	3	4	Morning
7.32538e+18	2024-01-18 11:16:59	4			1972-01-17	Male	178	94	29.7	Right	THIRD TEST 24h	Erector Spin	Lateral	Lying	Right	Relaxed	12.8	236	1.42	25.7	1.6	15	Fabio Valenti	000560	2024	1	3	4	Morning
7.32538e+18	2024-01-18 11:17:00	5			1972-01-17	Male	178	94	29.7	Right	THIRD TEST 24h	Erector Spin	Lateral	Lying	Right	Relaxed	12.7	239	1.42	25.6	1.59	15	Fabio Valenti	000560	2024	1	3	4	Morning
7.32538e+18	2024-01-18 11:17:21	1			1972-01-17	Male	178	94	29.7	Right	THIRD TEST 24h	Erector Spin	Lateral	Sitting	Left	Relaxed	18.4	390	1.14	13.7	0.86	15	Fabio Valenti	000560	2024	1	3	4	Morning
7.32538e+18	2024-01-18 11:17:21	2			1972-01-17	Male	178	94	29.7	Right	THIRD TEST 24h	Erector Spin	Lateral	Sitting	Left	Relaxed	18.2	385	1.08	14	0.88	15	Fabio Valenti	000560	2024	1	3	4	Morning
7.32538e+18	2024-01-18 11:17:22	3			1972-01-17	Male	178	94	29.7	Right	THIRD TEST 24h	Erector Spin	Lateral	Sitting	Left	Relaxed	18.1	386	1.07	14	0.88	15	Fabio Valenti	000560	2024	1	3	4	Morning
7.32538e+18	2024-01-18 11:17:23	4			1972-01-17	Male	178	94	29.7	Right	THIRD TEST 24h	Erector Spin	Lateral	Sitting	Left	Relaxed	18	393	1.08	14	0.89	15	Fabio Valenti	000560	2024	1	3	4	Morning
7.32538e+18	2024-01-18 11:17:24	5			1972-01-17	Male	178	94	29.7	Right	THIRD TEST 24h	Erector Spin	Lateral	Sitting	Left	Relaxed	17.9	391	1.09	14	0.89	15	Fabio Valenti	000560	2024	1	3	4	Morning
7.32538e+18	2024-01-18 11:17:32	1			1972-01-17	Male	178	94	29.7	Right	THIRD TEST 24h	Erector Spin	Lateral	Sitting	Right	Relaxed	18.5	408	1.09	13.1	0.82	15	Fabio Valenti	000560	2024	1	3	4	Morning
7.32538e+18	2024-01-18 11:17:33	2			1972-01-17	Male	178	94	29.7	Right	THIRD TEST 24h	Erector Spin	Lateral	Sitting	Right	Relaxed	18.4	414	1.04	13	0.82	15	Fabio Valenti	000560	2024	1	3	4	Morning
7.32538e+18	2024-01-18 11:17:33	3			1972-01-17	Male	178	94	29.7	Right	THIRD TEST 24h	Erector Spin	Lateral	Sitting	Right	Relaxed	18.3	413	1.05	13.1	0.83	15	Fabio Valenti	000560	2024	1	3	4	Morning
7.32538e+18	2024-01-18 11:17:34	4			1972-01-17	Male	178	94	29.7	Right	THIRD TEST 24h	Erector Spin	Lateral	Sitting	Right	Relaxed	18.3	411	1.05	13	0.82	15	Fabio Valenti	000560	2024	1	3	4	Morning
7.32538e+18	2024-01-18 11:17:35	5			1972-01-17	Male	178	94	29.7	Right	THIRD TEST 24h	Erector Spin	Lateral	Sitting	Right	Relaxed	18.2	408	1.04	13.1	0.82	15	Fabio Valenti	000560	2024	1	3	4	Morning
7.32503e+18	2024-01-17 12:35:56	1			1994-08-15	Male	190	95	26.3	Right	FIRST TEST	Erector Spin	Lateral	Lying	Left	Relaxed	14.5	253	1.17	18.6	1.1	15	Fabio Valenti	000560	2024	1	3	3	Day
7.32503e+18	2024-01-17 12:36:07	2			1994-08-15	Male	190	95	26.3	Right	FIRST TEST	Erector Spin	Lateral	Lying	Left	Relaxed	14.4	266	1.12	18.5	1.09	15	Fabio Valenti	000560	2024	1	3	3	Day
7.32503e+18	2024-01-17 12:36:08	3			1994-08-15	Male	190	95	26.3	Right	FIRST TEST	Erector Spin	Lateral	Lying	Left	Relaxed	14.4	260	1.17	18.5	1.09	15	Fabio Valenti	000560	2024	1	3	3	Day
7.32503e+18	2024-01-17 12:36:08	4			1994-08-15	Male	190	95	26.3	Right	FIRST TEST	Erector Spin	Lateral	Lying	Left	Relaxed	14.5	261	1.1	18.3	1.07	15	Fabio Valenti	000560	2024	1	3	3	Day
7.32503e+18	2024-01-17 12:36:09	5			1994-08-15	Male	190	95	26.3	Right	FIRST TEST	Erector Spin	Lateral	Lying	Left	Relaxed	14.6	261	1.11	18.3	1.07	15	Fabio Valenti	000560	2024	1	3	3	Day
7.32503e+18	2024-01-17 12:36:20	1			1994-08-15	Male	190	95	26.3	Right	FIRST TEST	Erector Spin	Lateral	Lying	Right	Relaxed	15.1	281	1.3	18	1.07	15	Fabio Valenti	000560	2024	1	3	3	Day
7.32503e+18	2024-01-17 12:36:21	2			1994-08-15	Male	190	95	26.3	Right	FIRST TEST	Erector Spin	Lateral	Lying	Right	Relaxed	15.2	284	1.29	18	1.06	15	Fabio Valenti	000560	2024	1	3	3	Day
7.32503e+18	2024-01-17 12:36:21	3			1994-08-15	Male	190	95	26.3	Right	FIRST TEST	Erector Spin	Lateral	Lying	Right	Relaxed	15.2	285	1.26	18	1.07	15	Fabio Valenti	000560	2024	1	3	3	Day
7.32503e+18	2024-01-17 12:36:22	4			1994-08-15	Male	190	95	26.3	Right	FIRST TEST	Erector Spin	Lateral	Lying	Right	Relaxed	15.2	290	1.26	17.7	1.05	15	Fabio Valenti	000560	2024	1	3	3	Day
7.32503e+18	2024-01-17 12:36:23	5			1994-08-15	Male	190	95	26.3	Right	FIRST TEST	Erector Spin	Lateral	Lying	Right	Relaxed	15.2	289	1.28	17.7	1.04	15	Fabio Valenti	000560	2024	1	3	3	Day
7.32503e+18	2024-01-17 12:36:42	1			1994-08-15	Male	190	95	26.3	Right	FIRST TEST	Erector Spin	Lateral	Sitting	Left	Relaxed	17.6	412	1.11	13.2	0.82	15	Fabio Valenti	000560	2024	1	3	3	Day
7.32503e+18	2024-01-17 12:36:43	2			1994-08-15	Male	190	95	26.3	Right	FIRST TEST	Erector Spin	Lateral	Sitting	Left	Relaxed	17.6	410	1.11	13.2	0.82	15	Fabio Valenti	000560	2024	1	3	3	Day
7.32503e+18	2024-01-17 12:36:44	3			1994-08-15	Male	190	95	26.3	Right	FIRST TEST	Erector Spin	Lateral	Sitting	Left	Relaxed	17.6	416	1.12	13.2	0.82	15	Fabio Valenti	000560	2024	1	3	3	Day
7.32503e+18	2024-01-17 12:36:45	4			1994-08-15	Male	190	95	26.3	Right	FIRST TEST	Erector Spin	Lateral	Sitting	Left	Relaxed	17.4	423	1.08	13.2	0.82	15	Fabio Valenti	000560	2024	1	3	3	Day
7.32503e+18	2024-01-17 12:36:46	5			1994-08-15	Male	190	95	26.3	Right	FIRST TEST	Erector Spin	Lateral	Sitting	Left	Relaxed	17.6	429	1.09	13	0.81	15	Fabio Valenti	000560	2024	1	3	3	Day
7.32503e+18	2024-01-17 12:36:55	1			1994-08-15	Male	190	95	26.3	Right	FIRST TEST	Erector Spin	Lateral	Sitting	Right	Relaxed	17.4	425	1.17	13.2	0.82	15	Fabio Valenti	000560	2024	1	3	3	Day
7.32503e+18	2024-01-17 12:36:55	2			1994-08-15	Male	190	95	26.3	Right	FIRST TEST	Erector Spin	Lateral	Sitting	Right	Relaxed	17.3	426	1.14	13.3	0.82	15	Fabio Valenti	000560	2024	1	3	3	Day
7.32503e+18	2024-01-17 12:36:58	3			1994-08-15	Male	190	95	26.3	Right	FIRST TEST	Erector Spin	Lateral	Sitting	Right	Relaxed	17.6	433	1.17	13.1	0.81	15	Fabio Valenti	000560	2024	1	3	3	Day
7.32503e+18	2024-01-17 12:36:59	4			1994-08-15	Male	190	95	26.3	Right	FIRST TEST	Erector Spin	Lateral	Sitting	Right	Relaxed	17.8	444	1.17	12.7	0.79	15	Fabio Valenti	000560	2024	1	3	3	Day
7.32503e+18	2024-01-17 12:36:59	5			1994-08-15	Male	190	95	26.3	Right	FIRST TEST	Erector Spin	Lateral	Sitting	Right	Relaxed	17.8	441	1.16	12.9	0.8	15	Fabio Valenti	000560	2024	1	3	3	Day
7.32504e+18	2024-01-17 13:07:18	1			1994-08-15	Male	190	95	26.3	Right	SECOND TESTING 30 min	Erector Spin	Lateral	Lying	Left	Relaxed	15	258	1.11	18.2	1.07	15	Fabio Valenti	000560	2024	1	3	3	Day
7.32504e+18	2024-01-17 13:07:19	2			1994-08-15	Male	190	95	26.3	Right	SECOND TESTING 30 min	Erector Spin	Lateral	Lying	Left	Relaxed	14.9	265	1.11	18.2	1.07	15	Fabio Valenti	000560	2024	1	3	3	Day
7.32504e+18	2024-01-17 13:07:19	3			1994-08-15	Male	190	95	26.3	Right	SECOND TESTING 30 min	Erector Spin	Lateral	Lying	Left	Relaxed	15.2	267	1.1	18.2	1.08	15	Fabio Valenti	000560	2024	1	3	3	Day
7.32504e+18	2024-01-17 13:07:20	4			1994-08-15	Male	190	95	26.3	Right	SECOND TESTING 30 min	Erector Spin	Lateral	Lying	Left	Relaxed	15.3	269	1.1	18	1.07	15	Fabio Valenti	000560	2024	1	3	3	Day
7.32504e+18	2024-01-17 13:07:21	5			1994-08-15	Male	190	95	26.3	Right	SECOND TESTING 30 min	Erector Spin	Lateral	Lying	Left	Relaxed	15.4	269	1.1	18	1.07	15	Fabio Valenti	000560	2024	1	3	3	Day
7.32504e+18	2024-01-17 13:07:40	1			1994-08-15	Male	190	95	26.3	Right	SECOND TESTING 30 min	Erector Spin	Lateral	Lying	Right	Relaxed	15.1	272	1.11	18.1	1.08	15	Fabio Valenti	000560	2024	1	3	3	Day
7.32504e+18	2024-01-17 13:07:41	2			1994-08-15	Male	190	95	26.3	Right	SECOND TESTING 30 min	Erector Spin	Lateral	Lying	Right	Relaxed	15.1	273	1.12	18.2	1.09	15	Fabio Valenti	000560	2024	1	3	3	Day
7.32504e+18	2024-01-17 13:07:42	3			1994-08-15	Male	190	95	26.3	Right	SECOND TESTING 30 min	Erector Spin	Lateral	Lying	Right	Relaxed	15.2	280	1.11	18.2	1.09	15	Fabio Valenti	000560	2024	1	3	3	Day
7.32504e+18	2024-01-17 13:07:42	4			1994-08-15	Male	190	95	26.3	Right	SECOND TESTING 30 min	Erector Spin	Lateral	Lying	Right	Relaxed	15.3	278	1.11	17.9	1.07	15	Fabio Valenti	000560	2024	1	3	3	Day
7.32504e+18	2024-01-17 13:07:43	5			1994-08-15	Male	190	95	26.3	Right	SECOND TESTING 30 min	Erector Spin	Lateral	Lying	Right	Relaxed	15.4	284	1.14	18	1.09	15	Fabio Valenti	000560	2024	1	3	3	Day
7.32504e+18	2024-01-17 13:08:00	1			1994-08-15	Male	190	95	26.3	Right	SECOND TESTING 30 min	Erector Spin	Lateral	Sitting	Left	Relaxed	17	389	1.1	14.1	0.88	15	Fabio Valenti	000560	2024	1	3	3	Day
7.32504e+18	2024-01-17 13:08:01	2			1994-08-15	Male	190	95	26.3	Right	SECOND TESTING 30 min	Erector Spin	Lateral	Sitting	Left	Relaxed	16.9	395	1.12	14	0.88	15	Fabio Valenti	000560	2024	1	3	3	Day
7.32504e+18	2024-01-17 13:08:03	3			1994-08-15	Male	190	95	26.3	Right	SECOND TESTING 30 min	Erector Spin	Lateral	Sitting	Left	Relaxed	17	407	1.08	13.7	0.86	15	Fabio Valenti	000560	2024	1	3	3	Day
7.32504e+18	2024-01-17 13:08:04	4			1994-08-15	Male	190	95	26.3	Right	SECOND TESTING 30 min	Erector Spin	Lateral	Sitting	Left	Relaxed	16.8	404	1.09	13.9	0.87	15	Fabio Valenti	000560	2024	1	3	3	Day
7.32504e+18	2024-01-17 13:08:05	5			1994-08-15	Male	190	95	26.3	Right	SECOND TESTING 30 min	Erector Spin	Lateral	Sitting	Left	Relaxed	16.9	408	1.1	13.8	0.87	15	Fabio Valenti	000560	2024	1	3	3	Day
7.32504e+18	2024-01-17 13:08:12	1			1994-08-15	Male	190	95	26.3	Right	SECOND TESTING 30 min	Erector Spin	Lateral	Sitting	Right	Relaxed	17.8	420	1.16	13.2	0.83	15	Fabio Valenti	000560	2024	1	3	3	Day
7.32504e+18	2024-01-17 13:08:13	2			1994-08-15	Male	190	95	26.3	Right	SECOND TESTING 30 min	Erector Spin	Lateral	Sitting	Right	Relaxed	17.4	435	1.2	13	0.82	15	Fabio Valenti	000560	2024	1	3	3	Day
7.32504e+18	2024-01-17 13:08:14	3			1994-08-15	Male	190	95	26.3	Right	SECOND TESTING 30 min	Erector Spin	Lateral	Sitting	Right	Relaxed	17.4	438	1.2	13.2	0.84	15	Fabio Valenti	000560	2024	1	3	3	Day
7.32504e+18	2024-01-17 13:08:16	4			1994-08-15	Male	190	95	26.3	Right	SECOND TESTING 30 min	Erector Spin	Lateral	Sitting	Right	Relaxed	17.8	453	1.18	12.7	0.81	15	Fabio Valenti	000560	2024	1	3	3	Day
7.32504e+18	2024-01-17 13:08:16	5			1994-08-15	Male	190	95	26.3	Right	SECOND TESTING 30 min	Erector Spin	Lateral	Sitting	Right	Relaxed	17.7	447	1.18	12.9	0.82	15	Fabio Valenti	000560	2024	1	3	3	Day
7.3254e+18	2024-01-18 12:31:53	1			1994-08-15	Male	190	95	26.3	Right	THIRD TEST 24h	Erector Spin	Lateral	Lying	Left	Relaxed	15	252	1.26	19.4	1.16	15	Fabio Valenti	000560	2024	1	3	4	Day
7.3254e+18	2024-01-18 12:31:53	2			1994-08-15	Male	190	95	26.3	Right	THIRD TEST 24h	Erector Spin	Lateral	Lying	Left	Relaxed	15.1	264	1.26	19.4	1.17	15	Fabio Valenti	000560	2024	1	3	4	Day
7.3254e+18	2024-01-18 12:31:54	3			1994-08-15	Male	190	95	26.3	Right	THIRD TEST 24h	Erector Spin	Lateral	Lying	Left	Relaxed	15.2	260	1.22	19.1	1.14	15	Fabio Valenti	000560	2024	1	3	4	Day
7.3254e+18	2024-01-18 12:31:55	4			1994-08-15	Male	190	95	26.3	Right	THIRD TEST 24h	Erector Spin	Lateral	Lying	Left	Relaxed	15.2	260	1.23	19.1	1.14	15	Fabio Valenti	000560	2024	1	3	4	Day
7.3254e+18	2024-01-18 12:31:56	5			1994-08-15	Male	190	95	26.3	Right	THIRD TEST 24h	Erector Spin	Lateral	Lying	Left	Relaxed	15.3	263	1.24	19	1.14	15	Fabio Valenti	000560	2024	1	3	4	Day
7.3254e+18	2024-01-18 12:32:02	1			1994-08-15	Male	190	95	26.3	Right	THIRD TEST 24h	Erector Spin	Lateral	Lying	Right	Relaxed	14.9	268	1.27	18.4	1.1	15	Fabio Valenti	000560	2024	1	3	4	Day
7.3254e+18	2024-01-18 12:32:03	2			1994-08-15	Male	190	95	26.3	Right	THIRD TEST 24h	Erector Spin	Lateral	Lying	Right	Relaxed	14.7	266	1.22	18.5	1.11	15	Fabio Valenti	000560	2024	1	3	4	Day
7.3254e+18	2024-01-18 12:32:04	3			1994-08-15	Male	190	95	26.3	Right	THIRD TEST 24h	Erector Spin	Lateral	Lying	Right	Relaxed	14.7	270	1.21	18.4	1.1	15	Fabio Valenti	000560	2024	1	3	4	Day
7.3254e+18	2024-01-18 12:32:04	4			1994-08-15	Male	190	95	26.3	Right	THIRD TEST 24h	Erector Spin	Lateral	Lying	Right	Relaxed	14.8	278	1.24	18.3	1.1	15	Fabio Valenti	000560	2024	1	3	4	Day
7.3254e+18	2024-01-18 12:32:05	5			1994-08-15	Male	190	95	26.3	Right	THIRD TEST 24h	Erector Spin	Lateral	Lying	Right	Relaxed	14.8	276	1.22	18.3	1.1	15	Fabio Valenti	000560	2024	1	3	4	Day
7.3254e+18	2024-01-18 12:32:25	1			1994-08-15	Male	190	95	26.3	Right	THIRD TEST 24h	Erector Spin	Lateral	Sitting	Left	Relaxed	17.5	411	1.07	13.2	0.83	15	Fabio Valenti	000560	2024	1	3	4	Day
7.3254e+18	2024-01-18 12:32:26	2			1994-08-15	Male	190	95	26.3	Right	THIRD TEST 24h	Erector Spin	Lateral	Sitting	Left	Relaxed	17.4	421	1.05	13	0.82	15	Fabio Valenti	000560	2024	1	3	4	Day
7.3254e+18	2024-01-18 12:32:27	3			1994-08-15	Male	190	95	26.3	Right	THIRD TEST 24h	Erector Spin	Lateral	Sitting	Left	Relaxed	17.4	421	1.05	13.1	0.83	15	Fabio Valenti	000560	2024	1	3	4	Day
7.3254e+18	2024-01-18 12:32:27	4			1994-08-15	Male	190	95	26.3	Right	THIRD TEST 24h	Erector Spin	Lateral	Sitting	Left	Relaxed	17.4	422	1.04	13.1	0.83	15	Fabio Valenti	000560	2024	1	3	4	Day
7.3254e+18	2024-01-18 12:32:28	5			1994-08-15	Male	190	95	26.3	Right	THIRD TEST 24h	Erector Spin	Lateral	Sitting	Left	Relaxed	17.4	425	1.04	13	0.82	15	Fabio Valenti	000560	2024	1	3	4	Day
7.3254e+18	2024-01-18 12:32:34	1			1994-08-15	Male	190	95	26.3	Right	THIRD TEST 24h	Erector Spin	Lateral	Sitting	Right	Relaxed	17.7	432	1.16	13.2	0.84	15	Fabio Valenti	000560	2024	1	3	4	Day
7.3254e+18	2024-01-18 12:32:35	2			1994-08-15	Male	190	95	26.3	Right	THIRD TEST 24h	Erector Spin	Lateral	Sitting	Right	Relaxed	17.5	439	1.14	13.2	0.84	15	Fabio Valenti	000560	2024	1	3	4	Day
7.3254e+18	2024-01-18 12:32:35	3			1994-08-15	Male	190	95	26.3	Right	THIRD TEST 24h	Erector Spin	Lateral	Sitting	Right	Relaxed	17.5	440	1.14	13.2	0.84	15	Fabio Valenti	000560	2024	1	3	4	Day
7.3254e+18	2024-01-18 12:32:36	4			1994-08-15	Male	190	95	26.3	Right	THIRD TEST 24h	Erector Spin	Lateral	Sitting	Right	Relaxed	17.5	439	1.13	13.3	0.85	15	Fabio Valenti	000560	2024	1	3	4	Day
7.3254e+18	2024-01-18 12:32:37	5			1994-08-15	Male	190	95	26.3	Right	THIRD TEST 24h	Erector Spin	Lateral	Sitting	Right	Relaxed	17.4	438	1.12	13.3	0.85	15	Fabio Valenti	000560	2024	1	3	4	Day
7.32279e+18	2024-01-11 11:43:01	1			1986-07-02	Female	160	54	21.1	Right	FIRST TEST	Erector Spin	Lateral	Lying	Left	Relaxed	15.9	364	1.09	15.3	0.94	15	Fabio Valenti	000560	2024	1	2	4	Morning
7.32279e+18	2024-01-11 11:43:02	2			1986-07-02	Female	160	54	21.1	Right	FIRST TEST	Erector Spin	Lateral	Lying	Left	Relaxed	16	369	1.08	15	0.93	15	Fabio Valenti	000560	2024	1	2	4	Morning
7.32279e+18	2024-01-11 11:43:03	3			1986-07-02	Female	160	54	21.1	Right	FIRST TEST	Erector Spin	Lateral	Lying	Left	Relaxed	16	373	1.07	15	0.93	15	Fabio Valenti	000560	2024	1	2	4	Morning
7.32279e+18	2024-01-11 11:43:03	4			1986-07-02	Female	160	54	21.1	Right	FIRST TEST	Erector Spin	Lateral	Lying	Left	Relaxed	16	377	1.08	15	0.93	15	Fabio Valenti	000560	2024	1	2	4	Morning
7.32279e+18	2024-01-11 11:43:04	5			1986-07-02	Female	160	54	21.1	Right	FIRST TEST	Erector Spin	Lateral	Lying	Left	Relaxed	16.1	376	1.07	15	0.93	15	Fabio Valenti	000560	2024	1	2	4	Morning
7.32279e+18	2024-01-11 11:43:13	1			1986-07-02	Female	160	54	21.1	Right	FIRST TEST	Erector Spin	Lateral	Lying	Right	Relaxed	16.9	372	1.17	15.2	0.95	15	Fabio Valenti	000560	2024	1	2	4	Morning
7.32279e+18	2024-01-11 11:43:14	2			1986-07-02	Female	160	54	21.1	Right	FIRST TEST	Erector Spin	Lateral	Lying	Right	Relaxed	17.1	380	1.15	15	0.94	15	Fabio Valenti	000560	2024	1	2	4	Morning
7.32279e+18	2024-01-11 11:43:15	3			1986-07-02	Female	160	54	21.1	Right	FIRST TEST	Erector Spin	Lateral	Lying	Right	Relaxed	17.2	384	1.13	14.9	0.94	15	Fabio Valenti	000560	2024	1	2	4	Morning
7.32279e+18	2024-01-11 11:43:16	4			1986-07-02	Female	160	54	21.1	Right	FIRST TEST	Erector Spin	Lateral	Lying	Right	Relaxed	17.2	389	1.13	14.7	0.92	15	Fabio Valenti	000560	2024	1	2	4	Morning
7.32279e+18	2024-01-11 11:43:16	5			1986-07-02	Female	160	54	21.1	Right	FIRST TEST	Erector Spin	Lateral	Lying	Right	Relaxed	17.2	391	1.14	14.7	0.93	15	Fabio Valenti	000560	2024	1	2	4	Morning
7.32279e+18	2024-01-11 11:43:44	1			1986-07-02	Female	160	54	21.1	Right	FIRST TEST	Erector Spin	Lateral	Sitting	Left	Relaxed	17.9	429	0.9	12.1	0.76	15	Fabio Valenti	000560	2024	1	2	4	Morning
7.32279e+18	2024-01-11 11:43:45	2			1986-07-02	Female	160	54	21.1	Right	FIRST TEST	Erector Spin	Lateral	Sitting	Left	Relaxed	17.9	428	0.87	12.1	0.76	15	Fabio Valenti	000560	2024	1	2	4	Morning
7.32279e+18	2024-01-11 11:43:45	3			1986-07-02	Female	160	54	21.1	Right	FIRST TEST	Erector Spin	Lateral	Sitting	Left	Relaxed	17.8	427	0.88	12.1	0.75	15	Fabio Valenti	000560	2024	1	2	4	Morning
7.32279e+18	2024-01-11 11:43:46	4			1986-07-02	Female	160	54	21.1	Right	FIRST TEST	Erector Spin	Lateral	Sitting	Left	Relaxed	17.9	419	0.87	12.2	0.76	15	Fabio Valenti	000560	2024	1	2	4	Morning
7.32279e+18	2024-01-11 11:43:47	5			1986-07-02	Female	160	54	21.1	Right	FIRST TEST	Erector Spin	Lateral	Sitting	Left	Relaxed	17.8	426	0.87	12.1	0.75	15	Fabio Valenti	000560	2024	1	2	4	Morning
7.32279e+18	2024-01-11 11:43:56	1			1986-07-02	Female	160	54	21.1	Right	FIRST TEST	Erector Spin	Lateral	Sitting	Right	Relaxed	18.9	535	0.92	9.8	0.63	15	Fabio Valenti	000560	2024	1	2	4	Morning
7.32279e+18	2024-01-11 11:43:57	2			1986-07-02	Female	160	54	21.1	Right	FIRST TEST	Erector Spin	Lateral	Sitting	Right	Relaxed	19	541	0.89	9.6	0.62	15	Fabio Valenti	000560	2024	1	2	4	Morning
7.32279e+18	2024-01-11 11:43:57	3			1986-07-02	Female	160	54	21.1	Right	FIRST TEST	Erector Spin	Lateral	Sitting	Right	Relaxed	18.8	542	0.88	9.6	0.62	15	Fabio Valenti	000560	2024	1	2	4	Morning
7.32279e+18	2024-01-11 11:43:58	4			1986-07-02	Female	160	54	21.1	Right	FIRST TEST	Erector Spin	Lateral	Sitting	Right	Relaxed	18.7	549	0.88	9.6	0.62	15	Fabio Valenti	000560	2024	1	2	4	Morning
7.32279e+18	2024-01-11 11:43:59	5			1986-07-02	Female	160	54	21.1	Right	FIRST TEST	Erector Spin	Lateral	Sitting	Right	Relaxed	18.7	548	0.87	9.6	0.62	15	Fabio Valenti	000560	2024	1	2	4	Morning
7.3228e+18	2024-01-11 12:17:22	1			1986-07-02	Female	160	54	21.1	Right	SECOND TESTING 30 min	Erector Spin	Lateral	Lying	Left	Relaxed	14.5	286	1.01	17.1	1.02	15	Fabio Valenti	000560	2024	1	2	4	Day
7.3228e+18	2024-01-11 12:17:23	2			1986-07-02	Female	160	54	21.1	Right	SECOND TESTING 30 min	Erector Spin	Lateral	Lying	Left	Relaxed	14.4	288	0.98	17.2	1.03	15	Fabio Valenti	000560	2024	1	2	4	Day
7.3228e+18	2024-01-11 12:17:24	3			1986-07-02	Female	160	54	21.1	Right	SECOND TESTING 30 min	Erector Spin	Lateral	Lying	Left	Relaxed	14.4	288	0.98	17.2	1.03	15	Fabio Valenti	000560	2024	1	2	4	Day
7.3228e+18	2024-01-11 12:17:25	4			1986-07-02	Female	160	54	21.1	Right	SECOND TESTING 30 min	Erector Spin	Lateral	Lying	Left	Relaxed	14.4	289	0.96	17	1.01	15	Fabio Valenti	000560	2024	1	2	4	Day
7.3228e+18	2024-01-11 12:17:25	5			1986-07-02	Female	160	54	21.1	Right	SECOND TESTING 30 min	Erector Spin	Lateral	Lying	Left	Relaxed	14.4	293	0.97	17	1.01	15	Fabio Valenti	000560	2024	1	2	4	Day
7.3228e+18	2024-01-11 12:17:36	1			1986-07-02	Female	160	54	21.1	Right	SECOND TESTING 30 min	Erector Spin	Lateral	Lying	Right	Relaxed	18	383	1.17	14.4	0.9	15	Fabio Valenti	000560	2024	1	2	4	Day
7.3228e+18	2024-01-11 12:17:37	2			1986-07-02	Female	160	54	21.1	Right	SECOND TESTING 30 min	Erector Spin	Lateral	Lying	Right	Relaxed	18.3	397	1.15	14	0.88	15	Fabio Valenti	000560	2024	1	2	4	Day
7.3228e+18	2024-01-11 12:17:38	3			1986-07-02	Female	160	54	21.1	Right	SECOND TESTING 30 min	Erector Spin	Lateral	Lying	Right	Relaxed	18.3	398	1.14	13.8	0.87	15	Fabio Valenti	000560	2024	1	2	4	Day
7.3228e+18	2024-01-11 12:17:38	4			1986-07-02	Female	160	54	21.1	Right	SECOND TESTING 30 min	Erector Spin	Lateral	Lying	Right	Relaxed	18.5	406	1.14	13.6	0.86	15	Fabio Valenti	000560	2024	1	2	4	Day
7.3228e+18	2024-01-11 12:17:39	5			1986-07-02	Female	160	54	21.1	Right	SECOND TESTING 30 min	Erector Spin	Lateral	Lying	Right	Relaxed	18.6	409	1.14	13.3	0.84	15	Fabio Valenti	000560	2024	1	2	4	Day
7.3228e+18	2024-01-11 12:17:59	1			1986-07-02	Female	160	54	21.1	Right	SECOND TESTING 30 min	Erector Spin	Lateral	Sitting	Left	Relaxed	20.1	514	0.87	10.2	0.65	15	Fabio Valenti	000560	2024	1	2	4	Day
7.3228e+18	2024-01-11 12:17:59	2			1986-07-02	Female	160	54	21.1	Right	SECOND TESTING 30 min	Erector Spin	Lateral	Sitting	Left	Relaxed	20	523	0.83	10.1	0.65	15	Fabio Valenti	000560	2024	1	2	4	Day
7.3228e+18	2024-01-11 12:18:00	3			1986-07-02	Female	160	54	21.1	Right	SECOND TESTING 30 min	Erector Spin	Lateral	Sitting	Left	Relaxed	19.6	526	0.81	10.1	0.65	15	Fabio Valenti	000560	2024	1	2	4	Day
7.3228e+18	2024-01-11 12:18:01	4			1986-07-02	Female	160	54	21.1	Right	SECOND TESTING 30 min	Erector Spin	Lateral	Sitting	Left	Relaxed	20	535	0.85	10	0.64	15	Fabio Valenti	000560	2024	1	2	4	Day
7.3228e+18	2024-01-11 12:18:02	5			1986-07-02	Female	160	54	21.1	Right	SECOND TESTING 30 min	Erector Spin	Lateral	Sitting	Left	Relaxed	20	533	0.83	10	0.64	15	Fabio Valenti	000560	2024	1	2	4	Day
7.3228e+18	2024-01-11 12:18:12	1			1986-07-02	Female	160	54	21.1	Right	SECOND TESTING 30 min	Erector Spin	Lateral	Sitting	Right	Relaxed	22.5	721	0.91	7.5	0.51	15	Fabio Valenti	000560	2024	1	2	4	Day
7.3228e+18	2024-01-11 12:18:13	2			1986-07-02	Female	160	54	21.1	Right	SECOND TESTING 30 min	Erector Spin	Lateral	Sitting	Right	Relaxed	22.4	732	0.88	7.5	0.51	15	Fabio Valenti	000560	2024	1	2	4	Day
7.3228e+18	2024-01-11 12:18:14	3			1986-07-02	Female	160	54	21.1	Right	SECOND TESTING 30 min	Erector Spin	Lateral	Sitting	Right	Relaxed	22.3	734	0.86	7.6	0.52	15	Fabio Valenti	000560	2024	1	2	4	Day
7.3228e+18	2024-01-11 12:18:14	4			1986-07-02	Female	160	54	21.1	Right	SECOND TESTING 30 min	Erector Spin	Lateral	Sitting	Right	Relaxed	22.4	737	0.86	7.5	0.51	15	Fabio Valenti	000560	2024	1	2	4	Day
7.3228e+18	2024-01-11 12:18:15	5			1986-07-02	Female	160	54	21.1	Right	SECOND TESTING 30 min	Erector Spin	Lateral	Sitting	Right	Relaxed	22.7	745	0.88	7.3	0.5	15	Fabio Valenti	000560	2024	1	2	4	Day
7.32316e+18	2024-01-12 11:45:26	1			1986-07-02	Female	160	54	21.1	Right	THIRD TEST 24h	Erector Spin	Lateral	Lying	Left	Relaxed	17	385	1.24	14.1	0.89	15	Fabio Valenti	000560	2024	1	2	5	Morning
7.32316e+18	2024-01-12 11:45:27	2			1986-07-02	Female	160	54	21.1	Right	THIRD TEST 24h	Erector Spin	Lateral	Lying	Left	Relaxed	17.1	397	1.22	14	0.89	15	Fabio Valenti	000560	2024	1	2	5	Morning
7.32316e+18	2024-01-12 11:45:27	3			1986-07-02	Female	160	54	21.1	Right	THIRD TEST 24h	Erector Spin	Lateral	Lying	Left	Relaxed	17.1	399	1.19	14	0.89	15	Fabio Valenti	000560	2024	1	2	5	Morning
7.32316e+18	2024-01-12 11:45:28	4			1986-07-02	Female	160	54	21.1	Right	THIRD TEST 24h	Erector Spin	Lateral	Lying	Left	Relaxed	17.1	402	1.2	14	0.9	15	Fabio Valenti	000560	2024	1	2	5	Morning
7.32316e+18	2024-01-12 11:45:29	5			1986-07-02	Female	160	54	21.1	Right	THIRD TEST 24h	Erector Spin	Lateral	Lying	Left	Relaxed	17.1	407	1.19	13.7	0.88	15	Fabio Valenti	000560	2024	1	2	5	Morning
7.32316e+18	2024-01-12 11:45:37	1			1986-07-02	Female	160	54	21.1	Right	THIRD TEST 24h	Erector Spin	Lateral	Lying	Right	Relaxed	19.2	406	1.34	13.4	0.85	15	Fabio Valenti	000560	2024	1	2	5	Morning
7.32316e+18	2024-01-12 11:45:38	2			1986-07-02	Female	160	54	21.1	Right	THIRD TEST 24h	Erector Spin	Lateral	Lying	Right	Relaxed	19.6	424	1.32	13	0.83	15	Fabio Valenti	000560	2024	1	2	5	Morning
7.32316e+18	2024-01-12 11:45:39	3			1986-07-02	Female	160	54	21.1	Right	THIRD TEST 24h	Erector Spin	Lateral	Lying	Right	Relaxed	19.6	430	1.26	12.9	0.82	15	Fabio Valenti	000560	2024	1	2	5	Morning
7.32316e+18	2024-01-12 11:45:39	4			1986-07-02	Female	160	54	21.1	Right	THIRD TEST 24h	Erector Spin	Lateral	Lying	Right	Relaxed	19.7	434	1.27	12.7	0.81	15	Fabio Valenti	000560	2024	1	2	5	Morning
7.32316e+18	2024-01-12 11:45:41	5			1986-07-02	Female	160	54	21.1	Right	THIRD TEST 24h	Erector Spin	Lateral	Lying	Right	Relaxed	19.6	437	1.26	12.5	0.8	15	Fabio Valenti	000560	2024	1	2	5	Morning
7.32316e+18	2024-01-12 11:45:58	1			1986-07-02	Female	160	54	21.1	Right	THIRD TEST 24h	Erector Spin	Lateral	Sitting	Left	Relaxed	19.1	457	0.91	11.3	0.72	15	Fabio Valenti	000560	2024	1	2	5	Morning
7.32316e+18	2024-01-12 11:45:59	2			1986-07-02	Female	160	54	21.1	Right	THIRD TEST 24h	Erector Spin	Lateral	Sitting	Left	Relaxed	19.2	469	0.89	11.2	0.71	15	Fabio Valenti	000560	2024	1	2	5	Morning
7.32316e+18	2024-01-12 11:45:59	3			1986-07-02	Female	160	54	21.1	Right	THIRD TEST 24h	Erector Spin	Lateral	Sitting	Left	Relaxed	19.2	470	0.86	11.1	0.71	15	Fabio Valenti	000560	2024	1	2	5	Morning
7.32316e+18	2024-01-12 11:46:00	4			1986-07-02	Female	160	54	21.1	Right	THIRD TEST 24h	Erector Spin	Lateral	Sitting	Left	Relaxed	19	471	0.87	11.2	0.71	15	Fabio Valenti	000560	2024	1	2	5	Morning
7.32316e+18	2024-01-12 11:46:01	5			1986-07-02	Female	160	54	21.1	Right	THIRD TEST 24h	Erector Spin	Lateral	Sitting	Left	Relaxed	19.1	471	0.85	11.1	0.71	15	Fabio Valenti	000560	2024	1	2	5	Morning
7.32316e+18	2024-01-12 11:46:21	1			1986-07-02	Female	160	54	21.1	Right	THIRD TEST 24h	Erector Spin	Lateral	Sitting	Right	Relaxed	20.9	580	0.94	9.2	0.6	15	Fabio Valenti	000560	2024	1	2	5	Morning
7.32316e+18	2024-01-12 11:46:22	2			1986-07-02	Female	160	54	21.1	Right	THIRD TEST 24h	Erector Spin	Lateral	Sitting	Right	Relaxed	20.8	597	0.93	9	0.59	15	Fabio Valenti	000560	2024	1	2	5	Morning
7.32316e+18	2024-01-12 11:46:23	3			1986-07-02	Female	160	54	21.1	Right	THIRD TEST 24h	Erector Spin	Lateral	Sitting	Right	Relaxed	20.8	598	0.95	9	0.59	15	Fabio Valenti	000560	2024	1	2	5	Morning
7.32316e+18	2024-01-12 11:46:23	4			1986-07-02	Female	160	54	21.1	Right	THIRD TEST 24h	Erector Spin	Lateral	Sitting	Right	Relaxed	21	614	0.95	8.9	0.59	15	Fabio Valenti	000560	2024	1	2	5	Morning
7.32316e+18	2024-01-12 11:46:24	5			1986-07-02	Female	160	54	21.1	Right	THIRD TEST 24h	Erector Spin	Lateral	Sitting	Right	Relaxed	20.9	618	0.96	8.9	0.59	15	Fabio Valenti	000560	2024	1	2	5	Morning
7.32468e+18	2024-01-16 14:14:14	1			2002-09-27	Male	178	100	31.6	Right	FIRST TEST	Erector Spin	Lateral	Lying	Left	Relaxed	16.3	327	1.2	16.4	1.01	15	Fabio Valenti	000560	2024	1	3	2	Day
7.32468e+18	2024-01-16 14:14:14	2			2002-09-27	Male	178	100	31.6	Right	FIRST TEST	Erector Spin	Lateral	Lying	Left	Relaxed	16.1	330	1.17	16.3	1.01	15	Fabio Valenti	000560	2024	1	3	2	Day
7.32468e+18	2024-01-16 14:14:15	3			2002-09-27	Male	178	100	31.6	Right	FIRST TEST	Erector Spin	Lateral	Lying	Left	Relaxed	16.2	330	1.15	16.3	1.01	15	Fabio Valenti	000560	2024	1	3	2	Day
7.32468e+18	2024-01-16 14:14:16	4			2002-09-27	Male	178	100	31.6	Right	FIRST TEST	Erector Spin	Lateral	Lying	Left	Relaxed	16.2	333	1.13	16.3	1.01	15	Fabio Valenti	000560	2024	1	3	2	Day
7.32468e+18	2024-01-16 14:14:17	5			2002-09-27	Male	178	100	31.6	Right	FIRST TEST	Erector Spin	Lateral	Lying	Left	Relaxed	16.2	331	1.13	16.3	1.01	15	Fabio Valenti	000560	2024	1	3	2	Day
7.32468e+18	2024-01-16 14:14:36	1			2002-09-27	Male	178	100	31.6	Right	FIRST TEST	Erector Spin	Lateral	Lying	Right	Relaxed	16.5	334	1.34	16.2	1.01	15	Fabio Valenti	000560	2024	1	3	2	Day
7.32468e+18	2024-01-16 14:14:37	2			2002-09-27	Male	178	100	31.6	Right	FIRST TEST	Erector Spin	Lateral	Lying	Right	Relaxed	16.4	338	1.32	16.2	1.01	15	Fabio Valenti	000560	2024	1	3	2	Day
7.32468e+18	2024-01-16 14:14:37	3			2002-09-27	Male	178	100	31.6	Right	FIRST TEST	Erector Spin	Lateral	Lying	Right	Relaxed	16.5	342	1.28	16	0.99	15	Fabio Valenti	000560	2024	1	3	2	Day
7.32468e+18	2024-01-16 14:14:38	4			2002-09-27	Male	178	100	31.6	Right	FIRST TEST	Erector Spin	Lateral	Lying	Right	Relaxed	16.5	346	1.26	15.9	0.99	15	Fabio Valenti	000560	2024	1	3	2	Day
7.32468e+18	2024-01-16 14:14:39	5			2002-09-27	Male	178	100	31.6	Right	FIRST TEST	Erector Spin	Lateral	Lying	Right	Relaxed	16.6	347	1.27	15.7	0.98	15	Fabio Valenti	000560	2024	1	3	2	Day
7.32468e+18	2024-01-16 14:15:14	1			2002-09-27	Male	178	100	31.6	Right	FIRST TEST	Erector Spin	Lateral	Sitting	Left	Relaxed	22.3	548	0.94	9.7	0.63	15	Fabio Valenti	000560	2024	1	3	2	Day
7.32468e+18	2024-01-16 14:15:15	2			2002-09-27	Male	178	100	31.6	Right	FIRST TEST	Erector Spin	Lateral	Sitting	Left	Relaxed	22.4	556	0.91	9.7	0.64	15	Fabio Valenti	000560	2024	1	3	2	Day
7.32468e+18	2024-01-16 14:15:16	3			2002-09-27	Male	178	100	31.6	Right	FIRST TEST	Erector Spin	Lateral	Sitting	Left	Relaxed	22.4	560	0.9	9.7	0.64	15	Fabio Valenti	000560	2024	1	3	2	Day
7.32468e+18	2024-01-16 14:15:16	4			2002-09-27	Male	178	100	31.6	Right	FIRST TEST	Erector Spin	Lateral	Sitting	Left	Relaxed	22.7	570	0.91	9.4	0.62	15	Fabio Valenti	000560	2024	1	3	2	Day
7.32468e+18	2024-01-16 14:15:17	5			2002-09-27	Male	178	100	31.6	Right	FIRST TEST	Erector Spin	Lateral	Sitting	Left	Relaxed	22.1	558	0.92	9.7	0.64	15	Fabio Valenti	000560	2024	1	3	2	Day
7.32468e+18	2024-01-16 14:15:41	1			2002-09-27	Male	178	100	31.6	Right	FIRST TEST	Erector Spin	Lateral	Sitting	Right	Relaxed	21.7	548	1	9.9	0.65	15	Fabio Valenti	000560	2024	1	3	2	Day
7.32468e+18	2024-01-16 14:15:42	2			2002-09-27	Male	178	100	31.6	Right	FIRST TEST	Erector Spin	Lateral	Sitting	Right	Relaxed	21.8	548	0.99	9.9	0.65	15	Fabio Valenti	000560	2024	1	3	2	Day
7.32468e+18	2024-01-16 14:15:43	3			2002-09-27	Male	178	100	31.6	Right	FIRST TEST	Erector Spin	Lateral	Sitting	Right	Relaxed	22	551	0.99	9.9	0.65	15	Fabio Valenti	000560	2024	1	3	2	Day
7.32468e+18	2024-01-16 14:15:45	4			2002-09-27	Male	178	100	31.6	Right	FIRST TEST	Erector Spin	Lateral	Sitting	Right	Relaxed	22.2	559	0.96	9.6	0.63	15	Fabio Valenti	000560	2024	1	3	2	Day
7.32468e+18	2024-01-16 14:15:46	5			2002-09-27	Male	178	100	31.6	Right	FIRST TEST	Erector Spin	Lateral	Sitting	Right	Relaxed	22.3	559	0.94	9.6	0.62	15	Fabio Valenti	000560	2024	1	3	2	Day
7.32469e+18	2024-01-16 14:44:54	1			2002-09-27	Male	178	100	31.6	Right	SECOND TESTING 30 min	Erector Spin	Lateral	Lying	Left	Relaxed	18.1	396	1.63	13.9	0.88	15	Fabio Valenti	000560	2024	1	3	2	Day
7.32469e+18	2024-01-16 14:44:55	2			2002-09-27	Male	178	100	31.6	Right	SECOND TESTING 30 min	Erector Spin	Lateral	Lying	Left	Relaxed	17.9	406	1.57	13.9	0.88	15	Fabio Valenti	000560	2024	1	3	2	Day
7.32469e+18	2024-01-16 14:44:56	3			2002-09-27	Male	178	100	31.6	Right	SECOND TESTING 30 min	Erector Spin	Lateral	Lying	Left	Relaxed	18	411	1.57	13.8	0.88	15	Fabio Valenti	000560	2024	1	3	2	Day
7.32469e+18	2024-01-16 14:44:56	4			2002-09-27	Male	178	100	31.6	Right	SECOND TESTING 30 min	Erector Spin	Lateral	Lying	Left	Relaxed	17.9	416	1.57	13.6	0.87	15	Fabio Valenti	000560	2024	1	3	2	Day
7.32469e+18	2024-01-16 14:44:57	5			2002-09-27	Male	178	100	31.6	Right	SECOND TESTING 30 min	Erector Spin	Lateral	Lying	Left	Relaxed	17.9	416	1.54	13.7	0.87	15	Fabio Valenti	000560	2024	1	3	2	Day
7.32469e+18	2024-01-16 14:45:05	1			2002-09-27	Male	178	100	31.6	Right	SECOND TESTING 30 min	Erector Spin	Lateral	Lying	Right	Relaxed	17	348	1.53	16	1	15	Fabio Valenti	000560	2024	1	3	2	Day
7.32469e+18	2024-01-16 14:45:06	2			2002-09-27	Male	178	100	31.6	Right	SECOND TESTING 30 min	Erector Spin	Lateral	Lying	Right	Relaxed	17.1	341	1.48	16.2	1.01	15	Fabio Valenti	000560	2024	1	3	2	Day
7.32469e+18	2024-01-16 14:45:06	3			2002-09-27	Male	178	100	31.6	Right	SECOND TESTING 30 min	Erector Spin	Lateral	Lying	Right	Relaxed	17	346	1.46	16	1	15	Fabio Valenti	000560	2024	1	3	2	Day
7.32469e+18	2024-01-16 14:45:07	4			2002-09-27	Male	178	100	31.6	Right	SECOND TESTING 30 min	Erector Spin	Lateral	Lying	Right	Relaxed	17.1	358	1.47	15.8	0.99	15	Fabio Valenti	000560	2024	1	3	2	Day
7.32469e+18	2024-01-16 14:45:08	5			2002-09-27	Male	178	100	31.6	Right	SECOND TESTING 30 min	Erector Spin	Lateral	Lying	Right	Relaxed	17	363	1.44	15.5	0.97	15	Fabio Valenti	000560	2024	1	3	2	Day
7.32469e+18	2024-01-16 14:45:30	1			2002-09-27	Male	178	100	31.6	Right	SECOND TESTING 30 min	Erector Spin	Lateral	Sitting	Left	Relaxed	22.1	566	0.95	9.3	0.6	15	Fabio Valenti	000560	2024	1	3	2	Day
7.32469e+18	2024-01-16 14:45:31	2			2002-09-27	Male	178	100	31.6	Right	SECOND TESTING 30 min	Erector Spin	Lateral	Sitting	Left	Relaxed	22	581	0.93	9.1	0.59	15	Fabio Valenti	000560	2024	1	3	2	Day
7.32469e+18	2024-01-16 14:45:32	3			2002-09-27	Male	178	100	31.6	Right	SECOND TESTING 30 min	Erector Spin	Lateral	Sitting	Left	Relaxed	22.1	578	0.92	9.2	0.6	15	Fabio Valenti	000560	2024	1	3	2	Day
7.32469e+18	2024-01-16 14:45:32	4			2002-09-27	Male	178	100	31.6	Right	SECOND TESTING 30 min	Erector Spin	Lateral	Sitting	Left	Relaxed	22.1	581	0.92	9.1	0.59	15	Fabio Valenti	000560	2024	1	3	2	Day
7.32469e+18	2024-01-16 14:45:33	5			2002-09-27	Male	178	100	31.6	Right	SECOND TESTING 30 min	Erector Spin	Lateral	Sitting	Left	Relaxed	22.4	589	0.91	9	0.59	15	Fabio Valenti	000560	2024	1	3	2	Day
7.32469e+18	2024-01-16 14:45:40	1			2002-09-27	Male	178	100	31.6	Right	SECOND TESTING 30 min	Erector Spin	Lateral	Sitting	Right	Relaxed	22.1	582	1.02	9.2	0.61	15	Fabio Valenti	000560	2024	1	3	2	Day
7.32469e+18	2024-01-16 14:45:41	2			2002-09-27	Male	178	100	31.6	Right	SECOND TESTING 30 min	Erector Spin	Lateral	Sitting	Right	Relaxed	21.8	591	0.99	9.1	0.6	15	Fabio Valenti	000560	2024	1	3	2	Day
7.32469e+18	2024-01-16 14:45:41	3			2002-09-27	Male	178	100	31.6	Right	SECOND TESTING 30 min	Erector Spin	Lateral	Sitting	Right	Relaxed	21.8	599	0.98	9	0.59	15	Fabio Valenti	000560	2024	1	3	2	Day
7.32469e+18	2024-01-16 14:45:42	4			2002-09-27	Male	178	100	31.6	Right	SECOND TESTING 30 min	Erector Spin	Lateral	Sitting	Right	Relaxed	22.1	611	0.98	8.9	0.59	15	Fabio Valenti	000560	2024	1	3	2	Day
7.32469e+18	2024-01-16 14:45:43	5			2002-09-27	Male	178	100	31.6	Right	SECOND TESTING 30 min	Erector Spin	Lateral	Sitting	Right	Relaxed	21.9	604	1.01	8.9	0.59	15	Fabio Valenti	000560	2024	1	3	2	Day
7.32506e+18	2024-01-17 14:51:32	1			2002-09-27	Male	178	100	31.6	Right	THIRD TEST 24h	Erector Spin	Lateral	Lying	Left	Relaxed	17.9	372	1.52	14.9	0.94	15	Fabio Valenti	000560	2024	1	3	3	Day
7.32506e+18	2024-01-17 14:51:33	2			2002-09-27	Male	178	100	31.6	Right	THIRD TEST 24h	Erector Spin	Lateral	Lying	Left	Relaxed	18.2	380	1.52	14.7	0.93	15	Fabio Valenti	000560	2024	1	3	3	Day
7.32506e+18	2024-01-17 14:51:34	3			2002-09-27	Male	178	100	31.6	Right	THIRD TEST 24h	Erector Spin	Lateral	Lying	Left	Relaxed	18.1	388	1.58	14.5	0.92	15	Fabio Valenti	000560	2024	1	3	3	Day
7.32506e+18	2024-01-17 14:51:35	4			2002-09-27	Male	178	100	31.6	Right	THIRD TEST 24h	Erector Spin	Lateral	Lying	Left	Relaxed	18.1	397	1.54	14.5	0.92	15	Fabio Valenti	000560	2024	1	3	3	Day
7.32506e+18	2024-01-17 14:51:35	5			2002-09-27	Male	178	100	31.6	Right	THIRD TEST 24h	Erector Spin	Lateral	Lying	Left	Relaxed	18.3	392	1.54	14.5	0.92	15	Fabio Valenti	000560	2024	1	3	3	Day
7.32506e+18	2024-01-17 14:51:48	1			2002-09-27	Male	178	100	31.6	Right	THIRD TEST 24h	Erector Spin	Lateral	Lying	Right	Relaxed	16.5	331	1.45	16.2	1	15	Fabio Valenti	000560	2024	1	3	3	Day
7.32506e+18	2024-01-17 14:51:49	2			2002-09-27	Male	178	100	31.6	Right	THIRD TEST 24h	Erector Spin	Lateral	Lying	Right	Relaxed	16.4	331	1.42	16.3	1.01	15	Fabio Valenti	000560	2024	1	3	3	Day
7.32506e+18	2024-01-17 14:51:49	3			2002-09-27	Male	178	100	31.6	Right	THIRD TEST 24h	Erector Spin	Lateral	Lying	Right	Relaxed	16.4	332	1.4	16.2	1	15	Fabio Valenti	000560	2024	1	3	3	Day
7.32506e+18	2024-01-17 14:51:50	4			2002-09-27	Male	178	100	31.6	Right	THIRD TEST 24h	Erector Spin	Lateral	Lying	Right	Relaxed	16.4	336	1.39	16.2	1.01	15	Fabio Valenti	000560	2024	1	3	3	Day
7.32506e+18	2024-01-17 14:51:51	5			2002-09-27	Male	178	100	31.6	Right	THIRD TEST 24h	Erector Spin	Lateral	Lying	Right	Relaxed	16.5	336	1.39	16.2	1.01	15	Fabio Valenti	000560	2024	1	3	3	Day
7.32506e+18	2024-01-17 14:52:16	1			2002-09-27	Male	178	100	31.6	Right	THIRD TEST 24h	Erector Spin	Lateral	Sitting	Left	Relaxed	21.4	524	0.87	10.2	0.66	15	Fabio Valenti	000560	2024	1	3	3	Day
7.32506e+18	2024-01-17 14:52:17	2			2002-09-27	Male	178	100	31.6	Right	THIRD TEST 24h	Erector Spin	Lateral	Sitting	Left	Relaxed	21.6	526	0.84	10.2	0.66	15	Fabio Valenti	000560	2024	1	3	3	Day
7.32506e+18	2024-01-17 14:52:18	3			2002-09-27	Male	178	100	31.6	Right	THIRD TEST 24h	Erector Spin	Lateral	Sitting	Left	Relaxed	21.4	526	0.85	10.2	0.66	15	Fabio Valenti	000560	2024	1	3	3	Day
7.32506e+18	2024-01-17 14:52:18	4			2002-09-27	Male	178	100	31.6	Right	THIRD TEST 24h	Erector Spin	Lateral	Sitting	Left	Relaxed	21.4	532	0.85	10.2	0.66	15	Fabio Valenti	000560	2024	1	3	3	Day
7.32506e+18	2024-01-17 14:52:19	5			2002-09-27	Male	178	100	31.6	Right	THIRD TEST 24h	Erector Spin	Lateral	Sitting	Left	Relaxed	21.5	530	0.85	10.1	0.65	15	Fabio Valenti	000560	2024	1	3	3	Day
7.32506e+18	2024-01-17 14:52:29	1			2002-09-27	Male	178	100	31.6	Right	THIRD TEST 24h	Erector Spin	Lateral	Sitting	Right	Relaxed	20.7	512	0.99	10.5	0.68	15	Fabio Valenti	000560	2024	1	3	3	Day
7.32506e+18	2024-01-17 14:52:30	2			2002-09-27	Male	178	100	31.6	Right	THIRD TEST 24h	Erector Spin	Lateral	Sitting	Right	Relaxed	20.6	510	0.97	10.5	0.68	15	Fabio Valenti	000560	2024	1	3	3	Day
7.32506e+18	2024-01-17 14:52:31	3			2002-09-27	Male	178	100	31.6	Right	THIRD TEST 24h	Erector Spin	Lateral	Sitting	Right	Relaxed	20.6	512	0.96	10.5	0.68	15	Fabio Valenti	000560	2024	1	3	3	Day
7.32506e+18	2024-01-17 14:52:32	4			2002-09-27	Male	178	100	31.6	Right	THIRD TEST 24h	Erector Spin	Lateral	Sitting	Right	Relaxed	20.5	512	0.94	10.6	0.69	15	Fabio Valenti	000560	2024	1	3	3	Day
7.32506e+18	2024-01-17 14:52:32	5			2002-09-27	Male	178	100	31.6	Right	THIRD TEST 24h	Erector Spin	Lateral	Sitting	Right	Relaxed	20.4	514	0.95	10.5	0.68	15	Fabio Valenti	000560	2024	1	3	3	Day
